# Supplementary material for: Visible light-mediated radical addition cascade cyclization of aryl isocyanides with tricarbonyls: rapid access to substituted phenanthridines and isoquinolines
Source: Royal Society of Chemistry journal article supplement (doi:10.1039/d4ob01405g), 2024-01-01

06-Feb-2024  
1: TOF MS ES+  
2.08e6

SM-03-221-B  
06022024\_12.66 (0.623) AM2 (Ar:22000.0,556.28,0.00,LS 10); ABS; Cm (66-(420.426+1.8))  
424.1759

Mol. For = C<sub>24</sub>H<sub>25</sub>NO<sub>6</sub>H  
Calcd. Mass = 424.1760 (M+H)

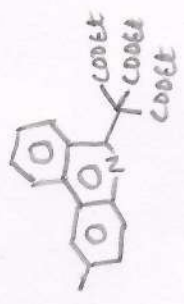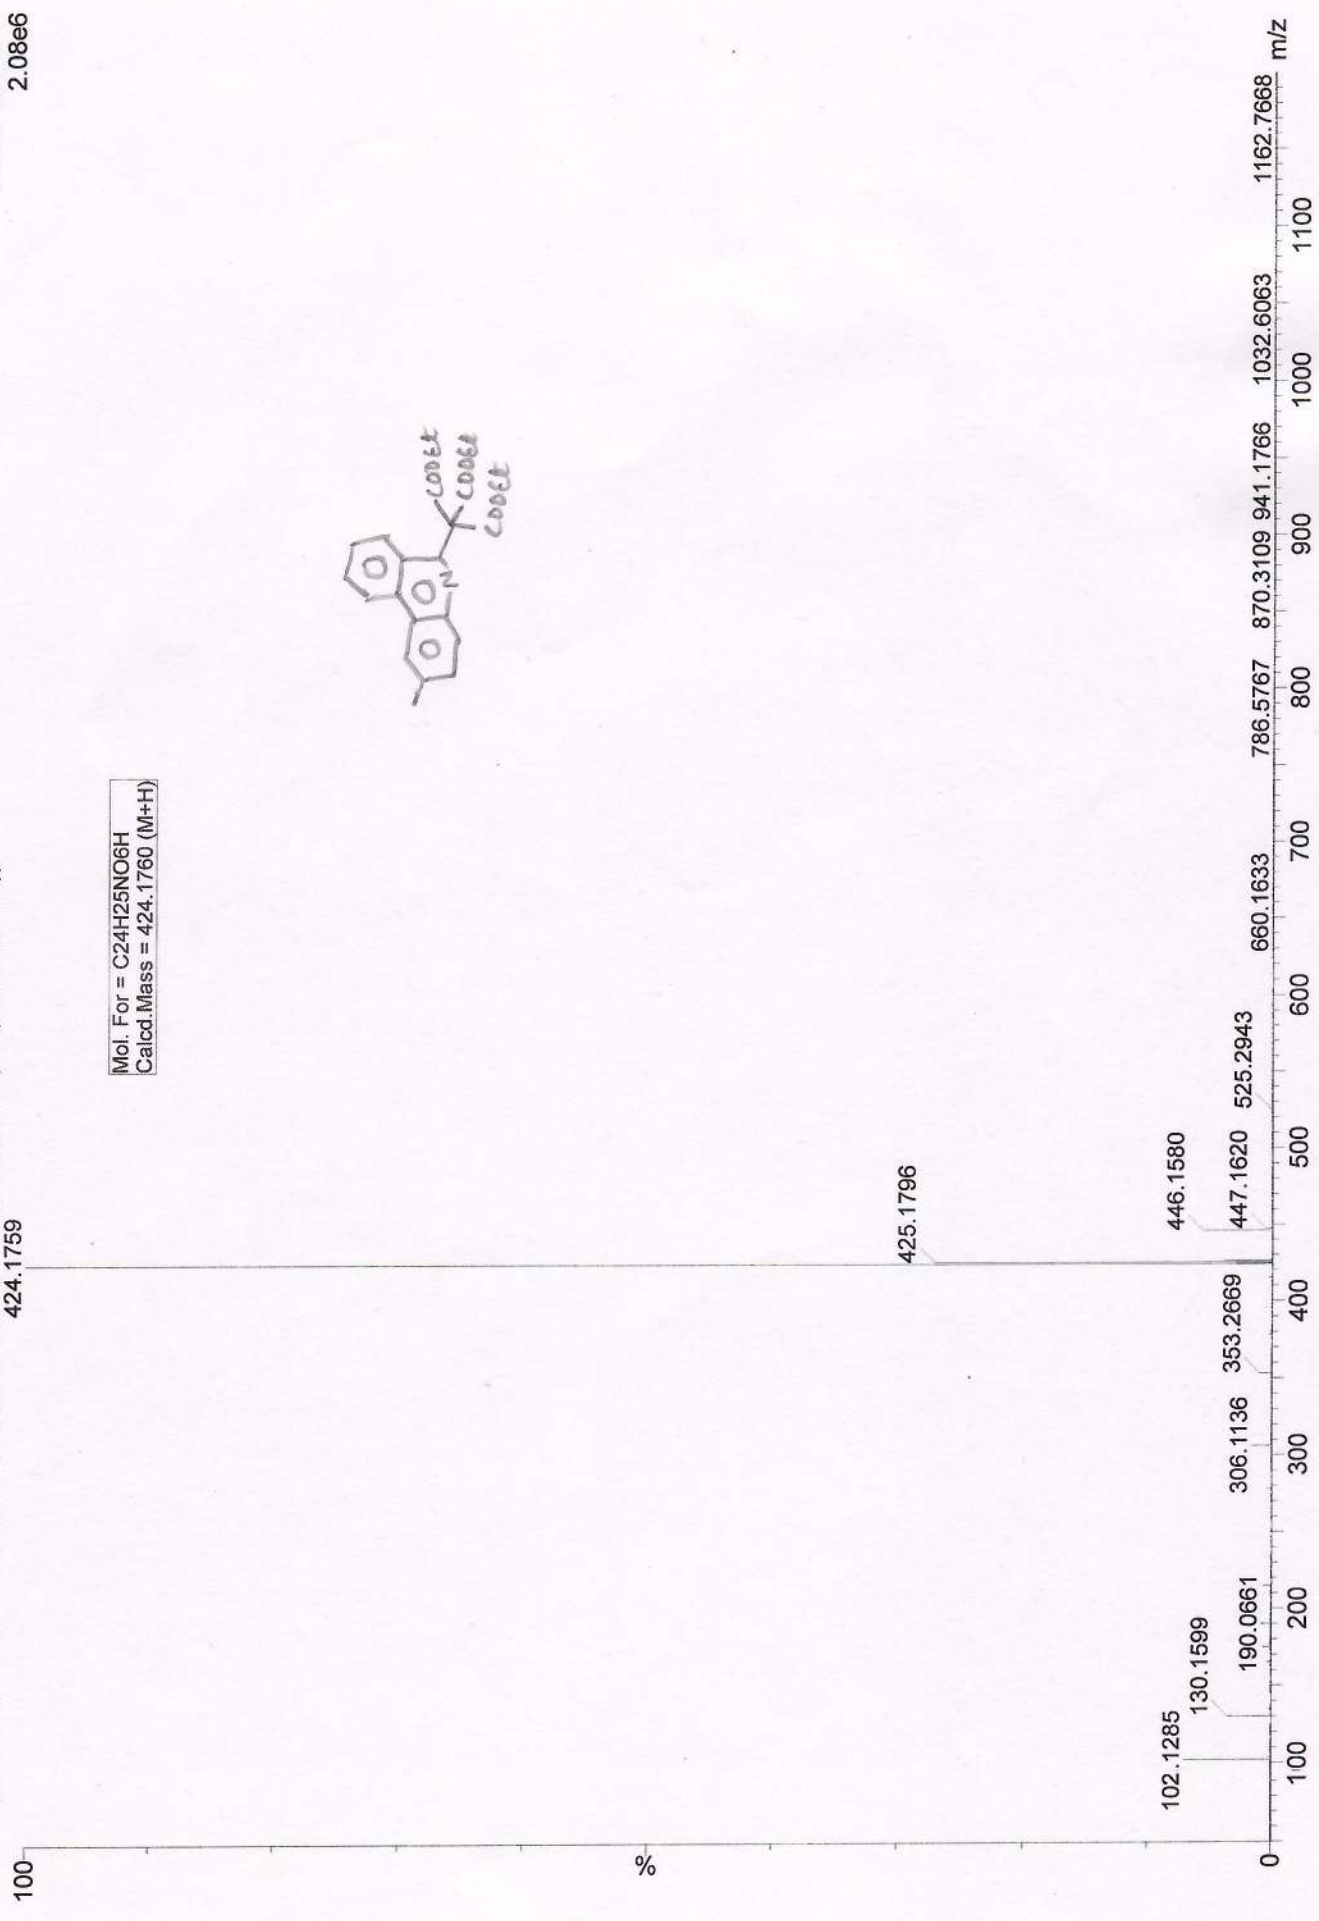

SM-05-347-B

IISc Organic Chemistry

09-Feb-2024  
1: TOF MS ES+  
6.37e5

10022024\_32 66 (0.622) AM2 (Ar, 22000.0, 556.28, 0.00, LS 10); ABS; Cm (66-(422:430+3:11))

100

410.1610

Mol. For=C<sub>23</sub>H<sub>23</sub>NO<sub>6</sub>H  
Calcd. Mass=410.1604 (M+H)

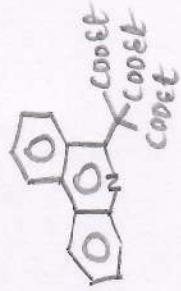

%

411.1647

432.1427

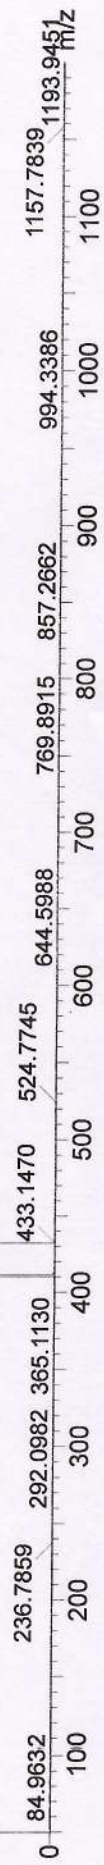

SM-05-350 B

13022024\_1467 (0.631) AM2 (Ar, 22000.0, 556.28, 0.00, LS 10); ABS; Cm (67-(1:10+405:423))

13-Feb-2024  
1: TOF MS ES+  
9.30e5

435.1552

457.1371

Mol. For= C<sub>24</sub>H<sub>22</sub>N<sub>2</sub>O<sub>6</sub>H  
Calcd. Mass= 435.1556 (M+H)

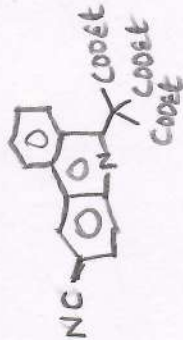

473.1110

225.1955

287.0852

474.1139  
519.1072

353.2644

520.1085

123.0896  
186.2166

226.1989

317.0898

891.2872

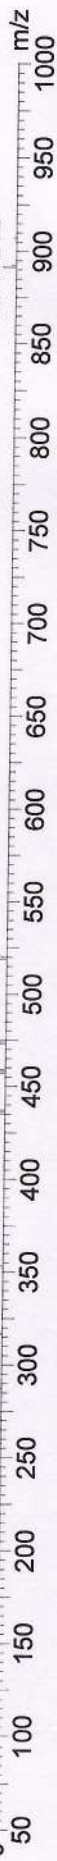

SM-05-366 B

IISc Organic Chemistry

12-Feb-2024  
1: TOF MS ES+  
1.02e4

12022024\_04 87 (0.822) AM2 (Ar,22000.0,556.28,0.00,LS 10); ABS; Cm (87-(409:419+12:17))  
486.1920

Mol. For=C<sub>29</sub>H<sub>27</sub>NO<sub>6</sub>H  
Calcd. Mass=486.1917 (M+H)

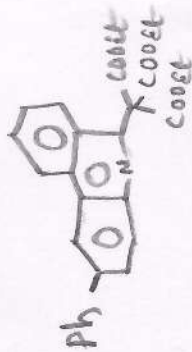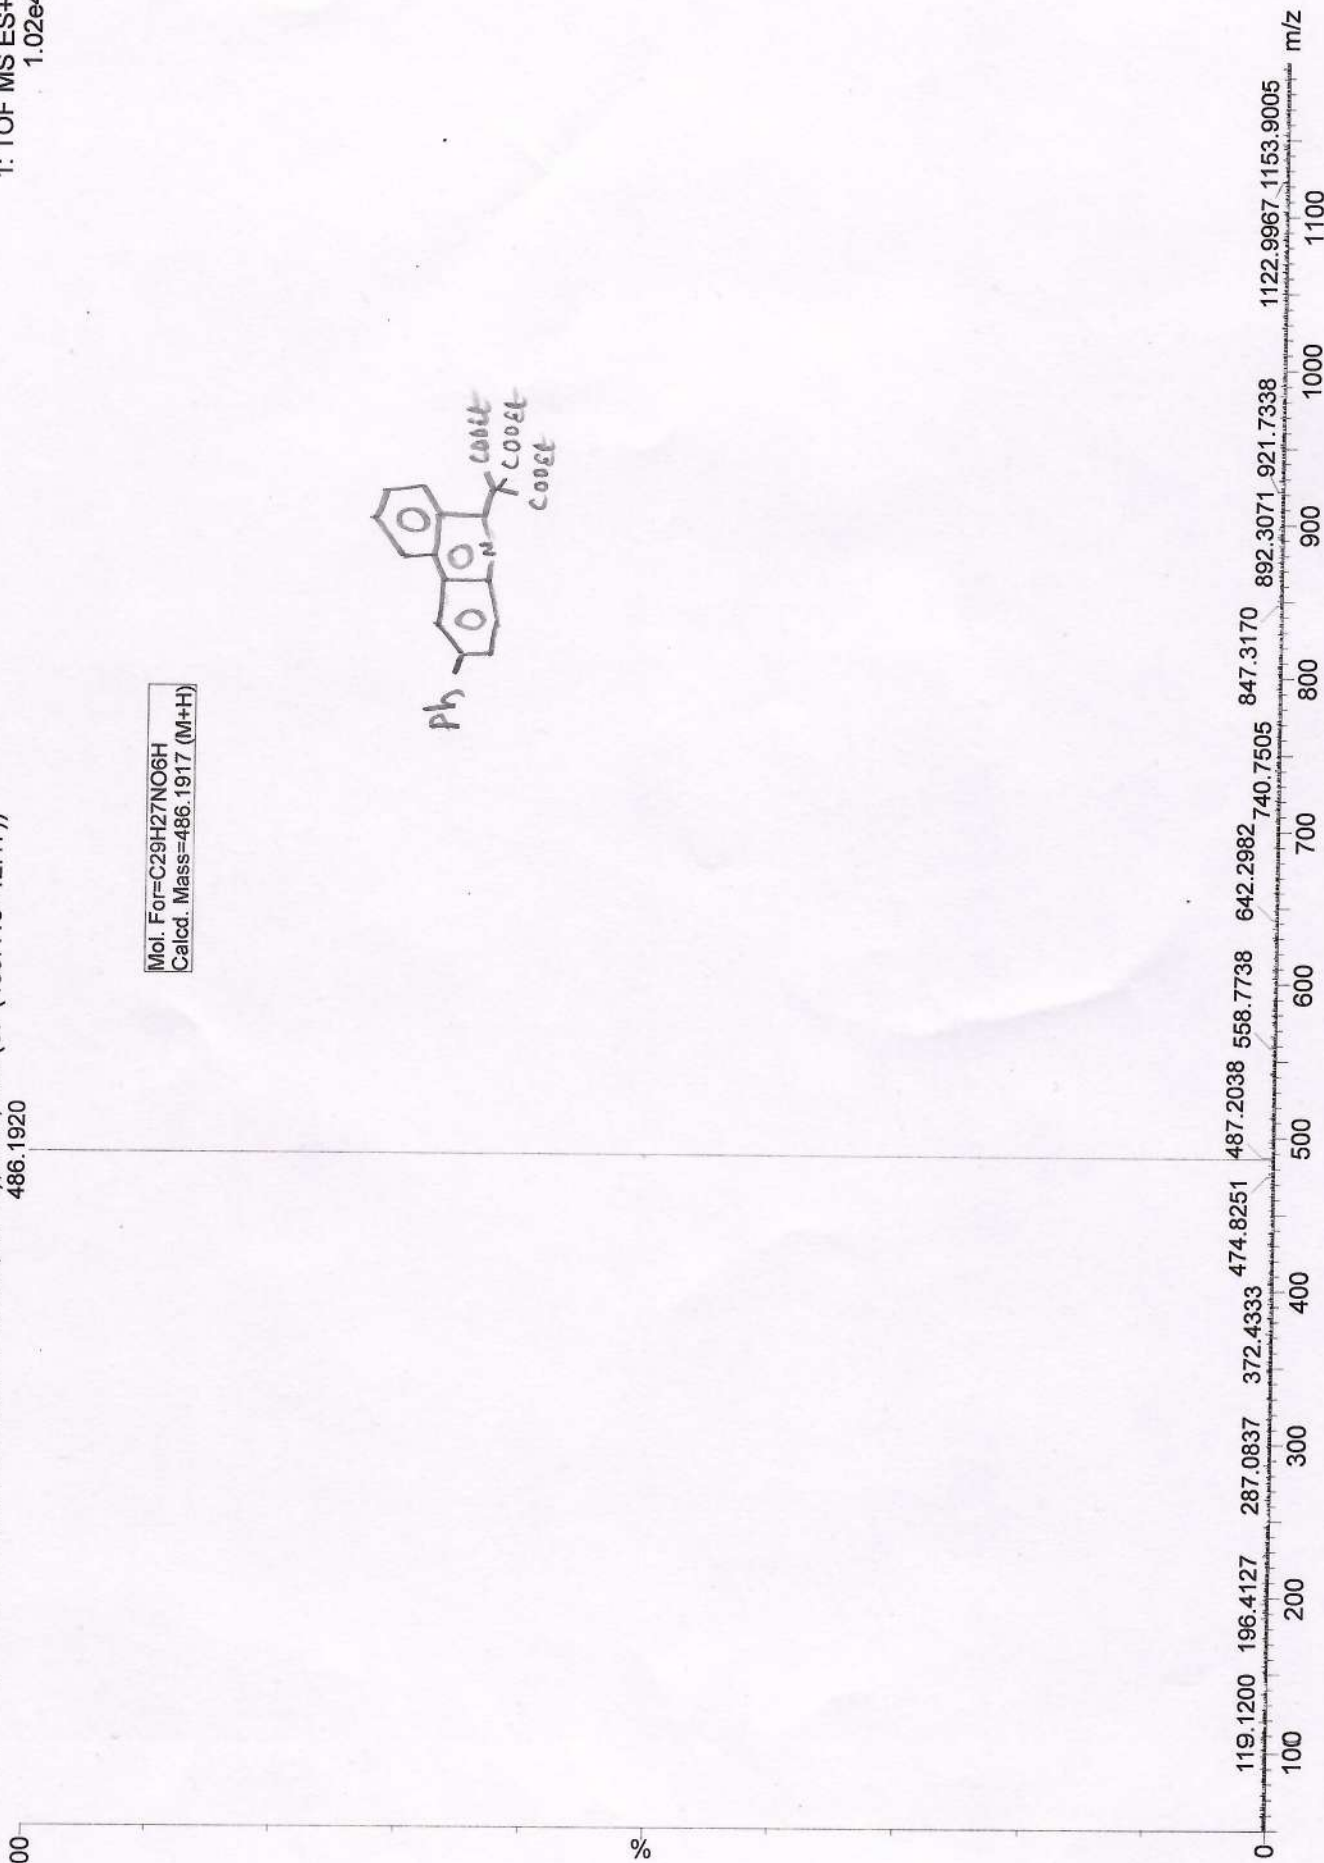



SM-05-351 B

IIsc Organic Chemistry

13-Feb-2024  
1: TOF MS ES+  
4.35e5

13022024\_16 68 (0.640) AM2 (Ar,22000,0.556,28,0.00,LS 10); ABS; Cm (68-(1:9+407.430))  
455.1452

Mol. For= C23H22N2O8H  
Calcd. Mass= 455.1454 (M+H)

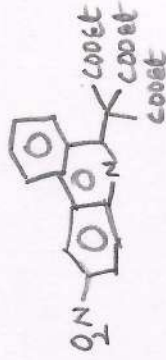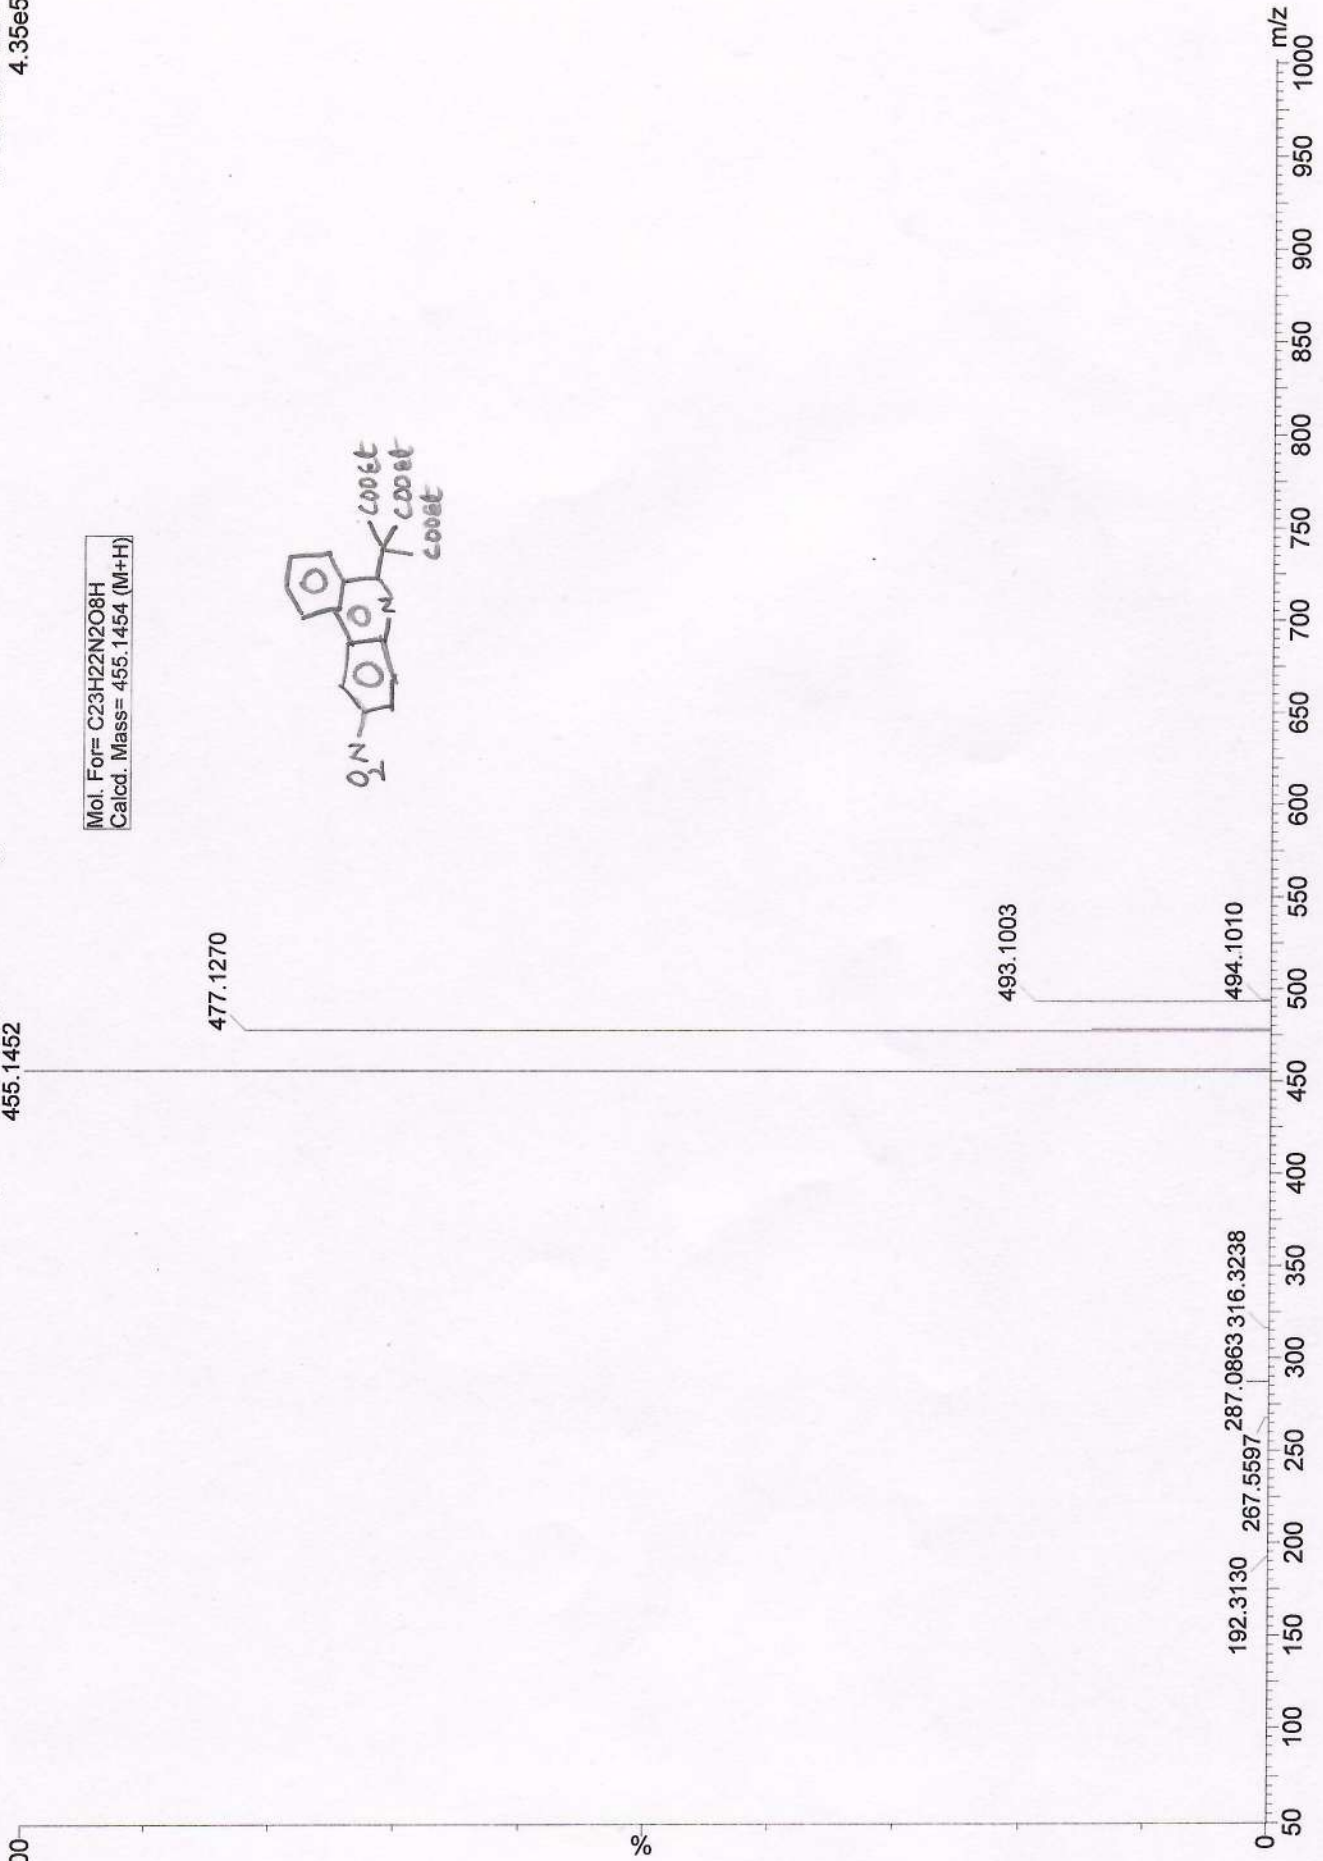

SM-05-338-B

IISc Organic Chemistry

06022024\_13 65 (0.614) AM2 (Ar,22000.0,556.28,0.00,LS 10); ABS; Cm (65-(416:424+1.6))

06-Feb-2024  
1: TOF MS ES+  
4.00e5

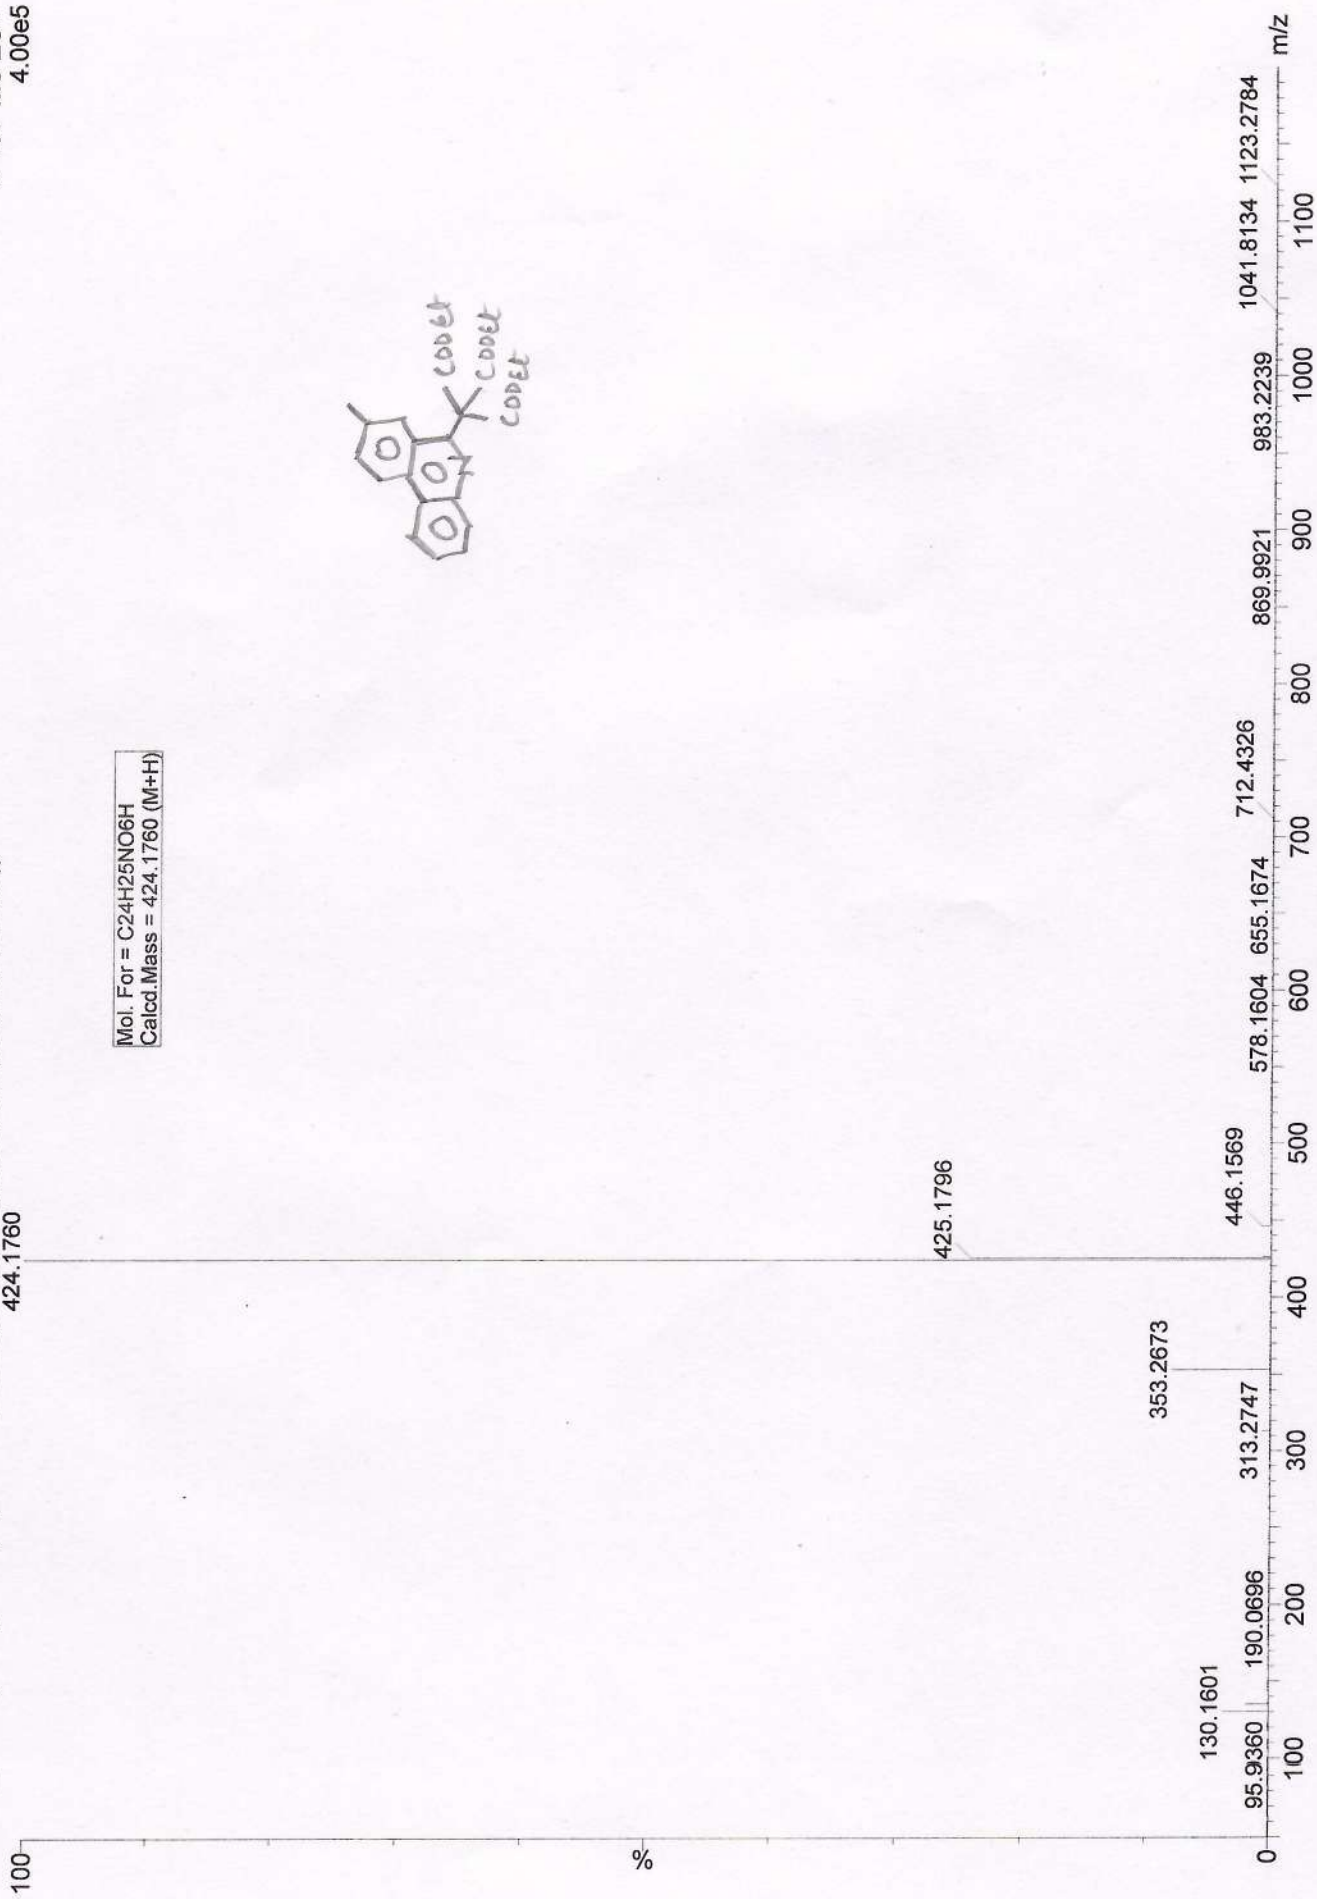

Mol. For = C<sub>24</sub>H<sub>25</sub>NO<sub>6</sub>H  
Calcd. Mass = 424.1760 (M+H)

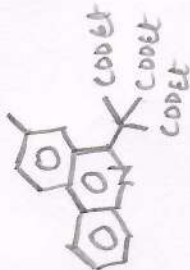

SM-05-336-B

IISc Organic Chemistry

07-Feb-2024

07022024\_05 67 (0.631) AM2 (Ar, 22000.0, 556.28, 0.00, LS 10); ABS; Cm (67-(421.426+5:13))

1: TOF MS ES+

7.45e5

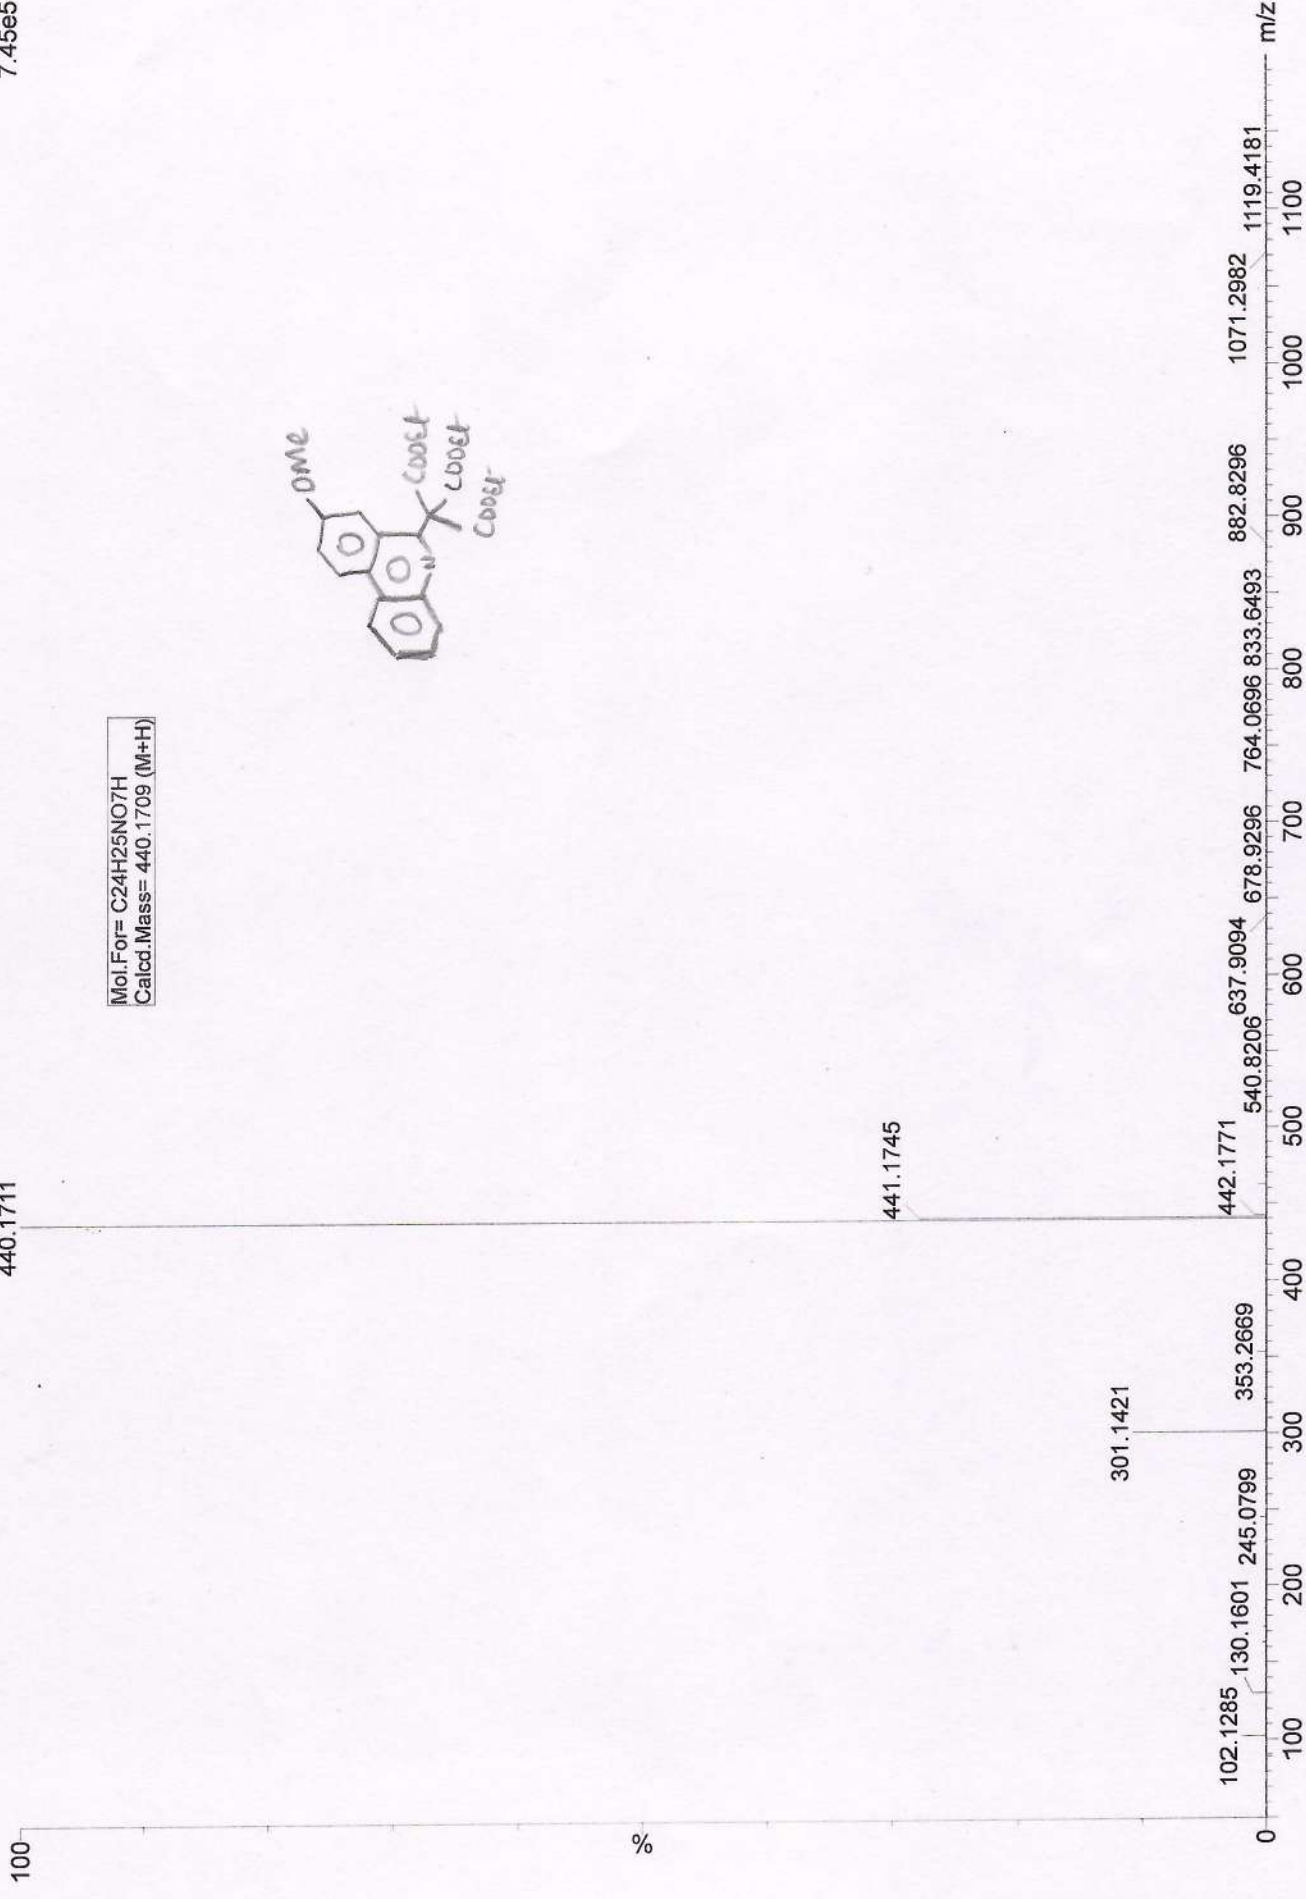

Mol. For= C<sub>24</sub>H<sub>25</sub>NO<sub>7</sub>H  
Calcd. Mass= 440.1709 (M+H)

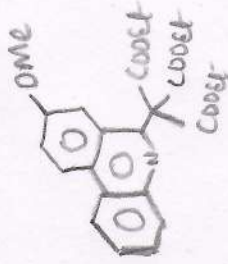

SM-05-340-B-1

IISc Organic Chemistry

09022024\_09 70 (0.657) AM2 (Ar, 22000, 0, 556.28, 0.00, LS 10); ABS; Cm (70-(421:430+1:9))

08-Feb-2024  
1: TOF MS ES+  
3.72e5

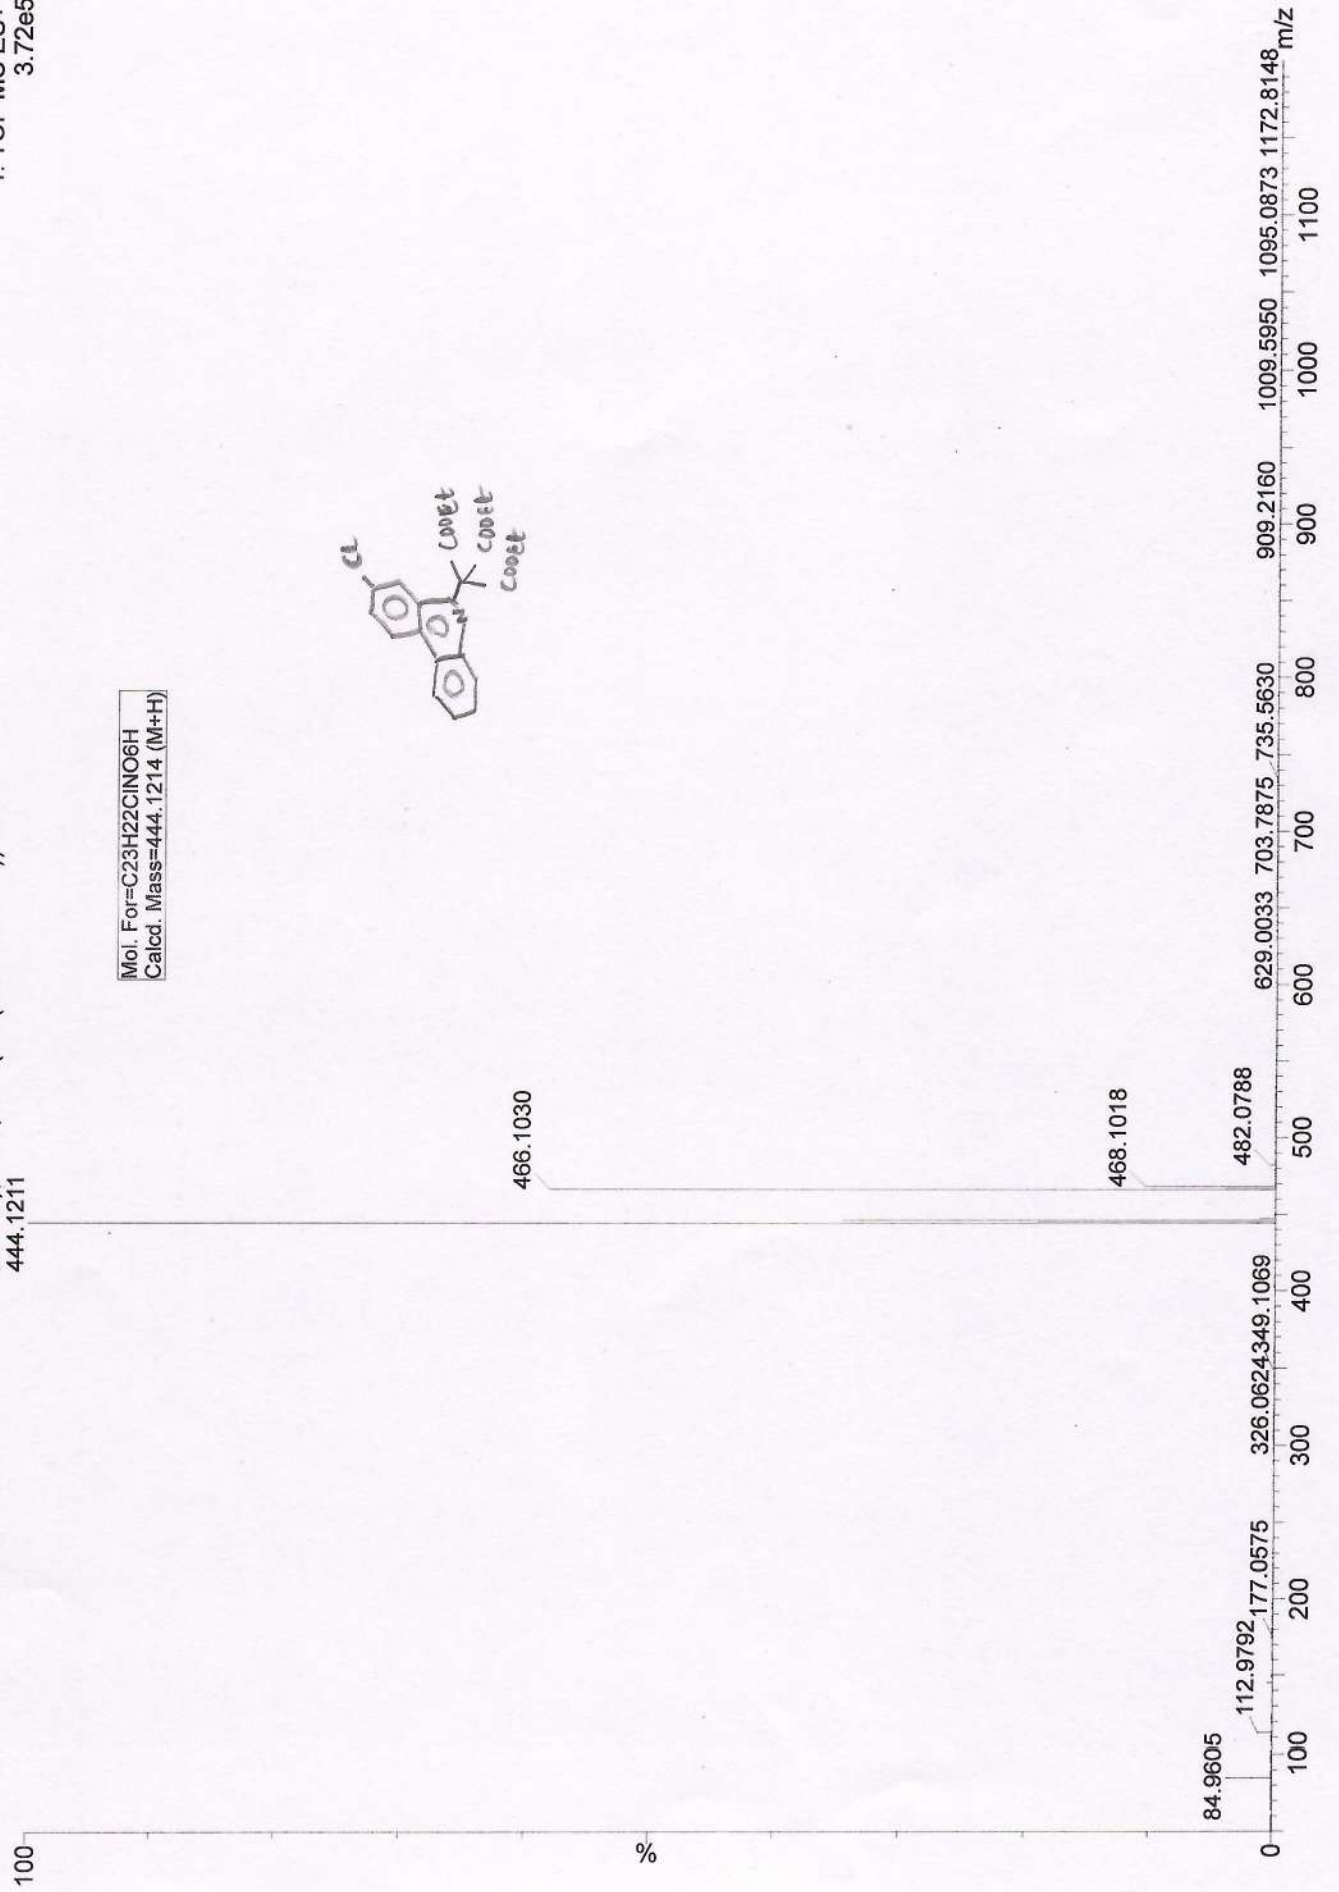

Mol. For=C<sub>23</sub>H<sub>22</sub>ClNO<sub>6</sub>H  
Calcd. Mass=444.1214 (M+H)

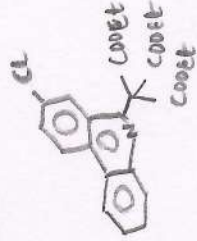



SM-05-341-B-1

IISc Organic Chemistry

08-Feb-2024

09022024\_10 69 (0.648) AM2 (Ar, 22000.0, 556.28, 0.00, LS 10); ABS; Cm (69-(417:431+3:19))

1: TOF MS ES+

490.0683

Mol. For=C<sub>23</sub>H<sub>22</sub>BrNO<sub>6</sub>H  
Calcd. Mass=488.0709 (M+H)

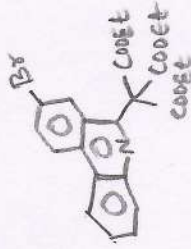

488.0702

510.0520 512.0501

491.0714

456.0645 459.2041

496.1649

508.2426

513.0529

528.0212

538.1302

m/z

545

540

535

530

525

520

515

510

505

500

495

490

485

480

475

470

465

460

455

450

%

SM-05-344-B-1

IISc Organic Chemistry

09-Feb-2024

10022024\_41 67 (0.631) AM2 (Ar,22000.0,556.28,0.00,LS 10); ABS; Cm (67-(418;427+3;12))

1: TOF MS ES+  
6.62e5

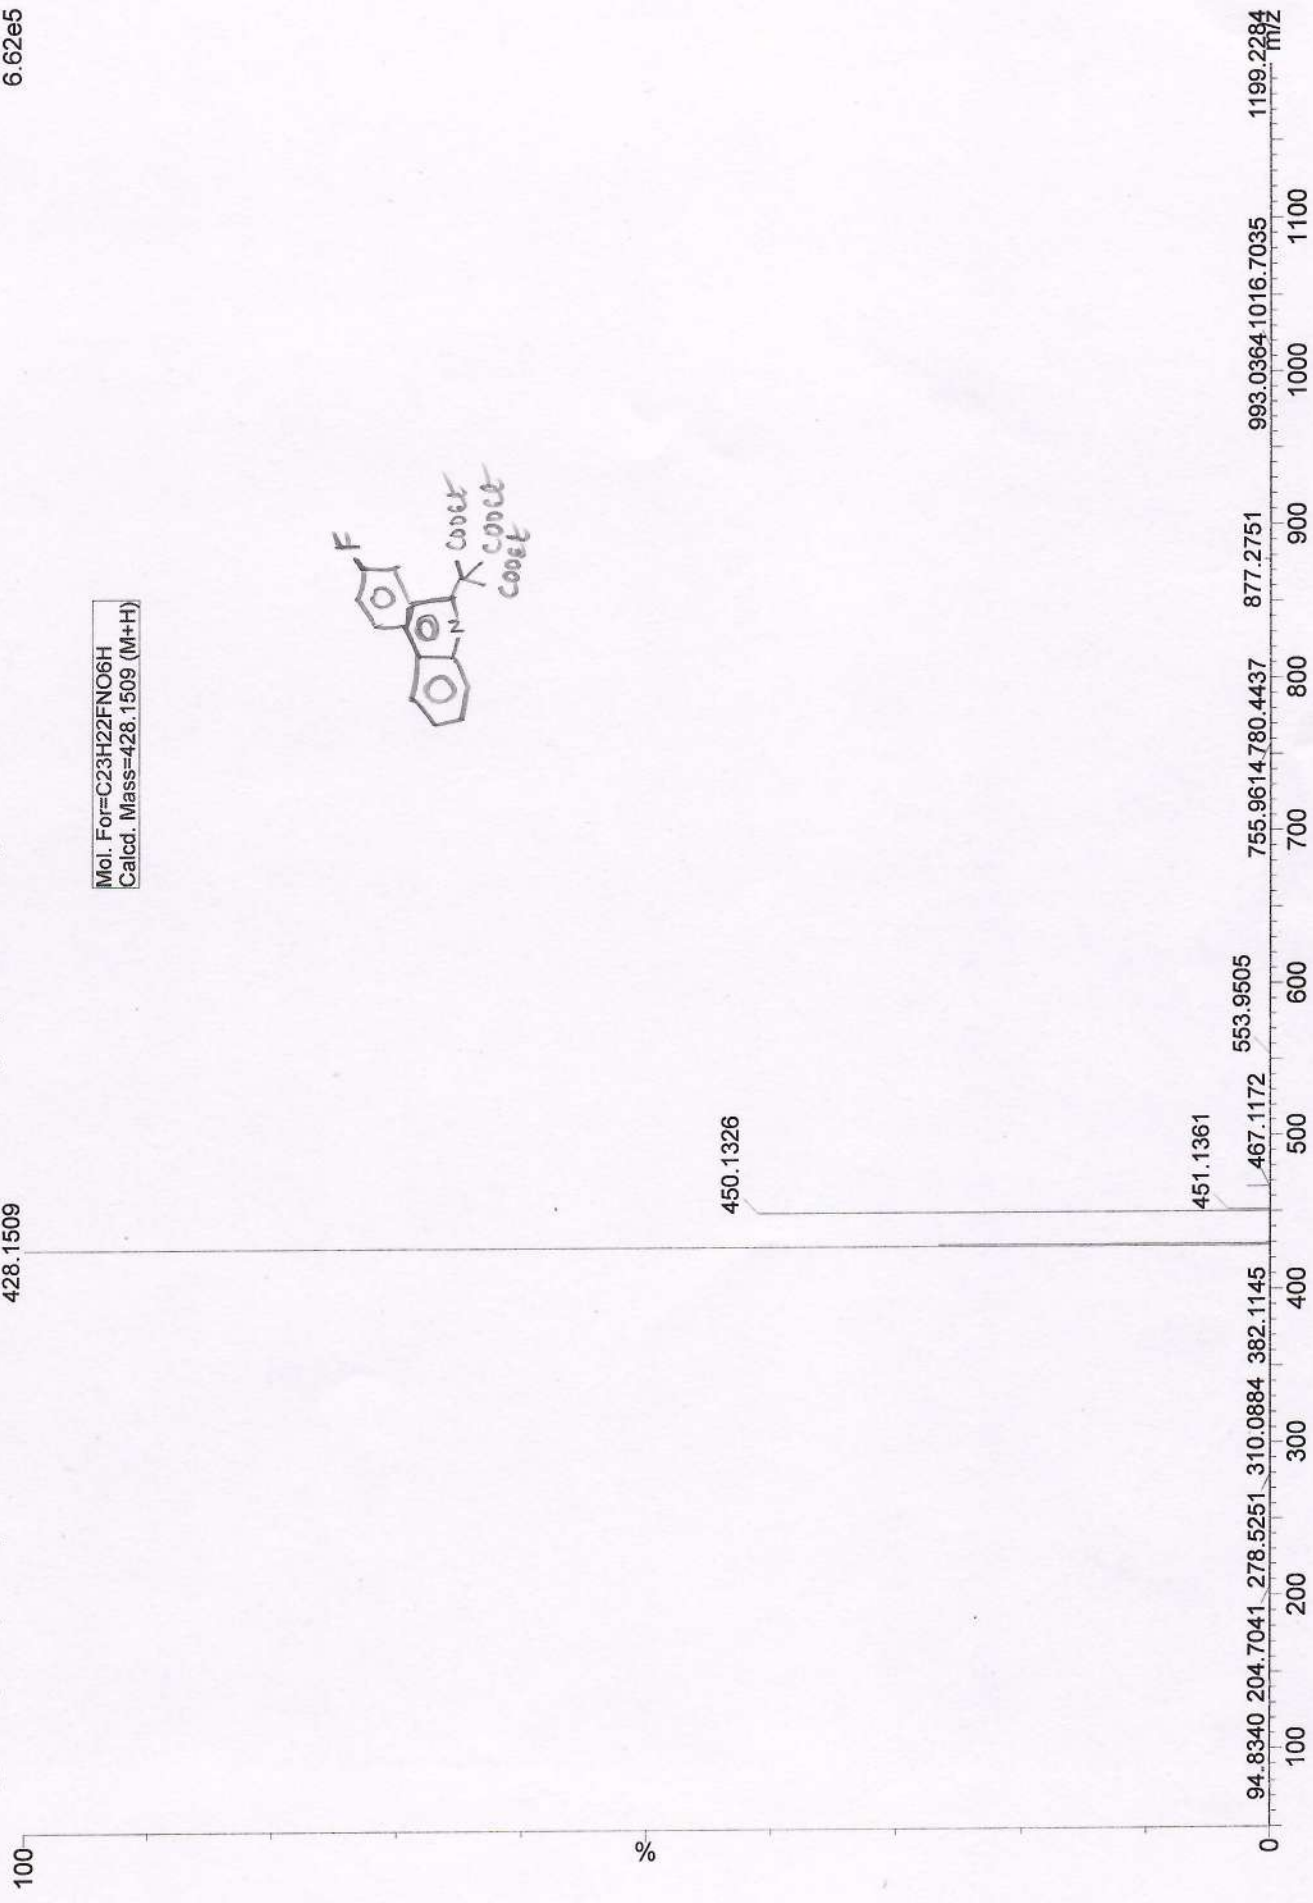

Mol. For=C<sub>23</sub>H<sub>22</sub>FNO<sub>6</sub>H  
Calcd. Mass=428.1509 (M+H)

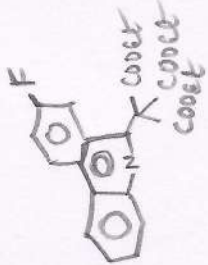

SM-05-343 B

09022024\_44 61 (0.580) AM2 (Ar,22000.0,556.28,0.00,LS 10); ABS; Cm (61-(422:429+3:10))

IIsc Organic Chemistry

08-Feb-2024

1: TOF MS ES+

1.01e6

Mol. For=C<sub>24</sub>H<sub>22</sub>F<sub>3</sub>NO<sub>6</sub>H  
Calcd. Mass=478.1477 (M+H)

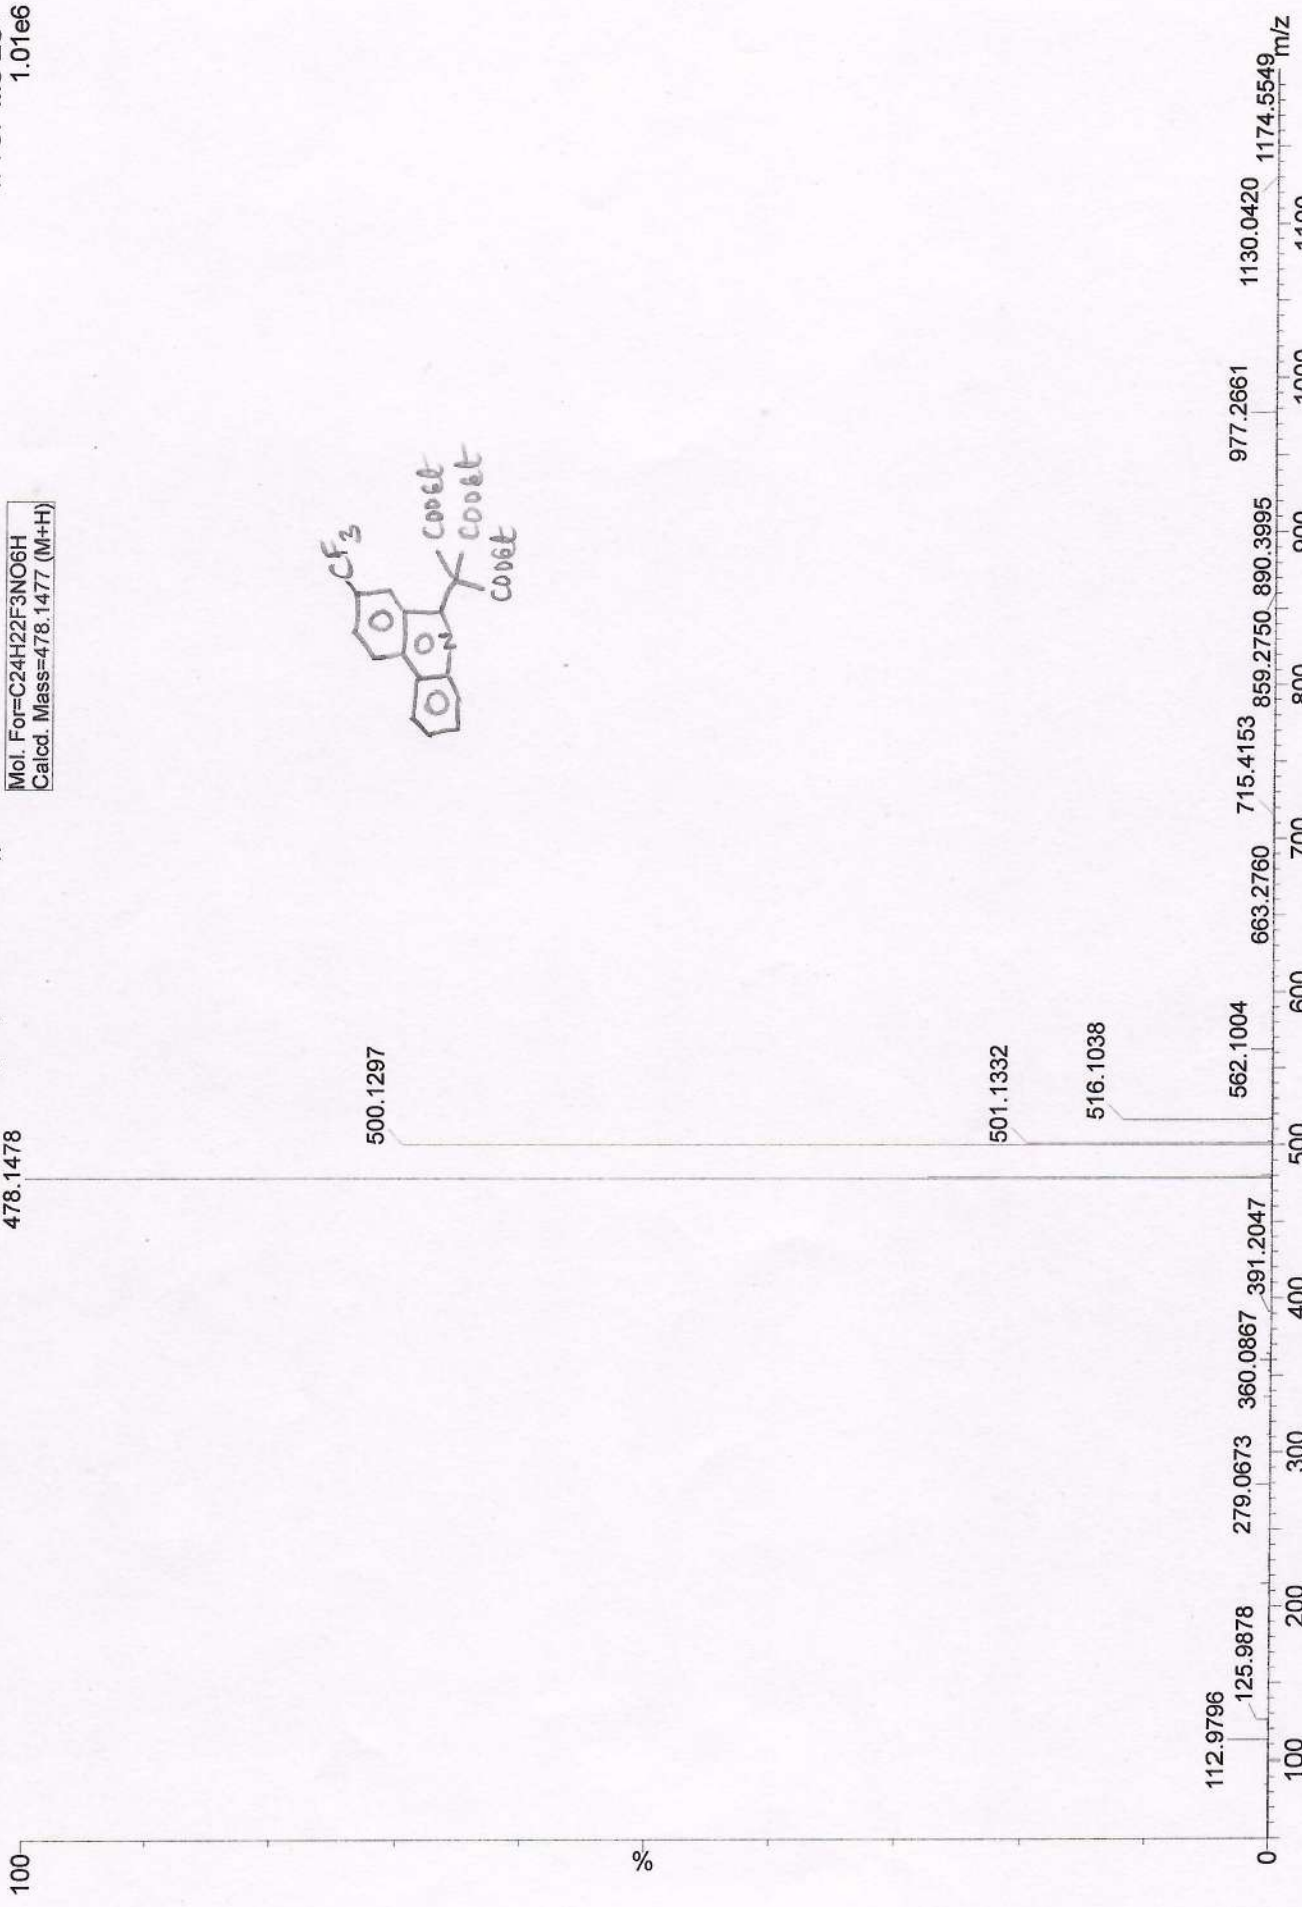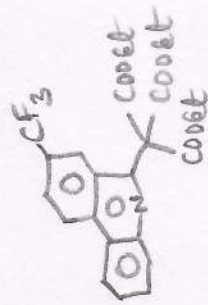

SM-05-345-B-1

10022024\_42\_69 (0.648) AM2 (Ar,22000.0,556.28,0.00,LS 10); ABS; Cm (69-(415:428+8:17))

IISc Organic Chemistry

09-Feb-2024  
1: TOF MS ES+  
3.19e5

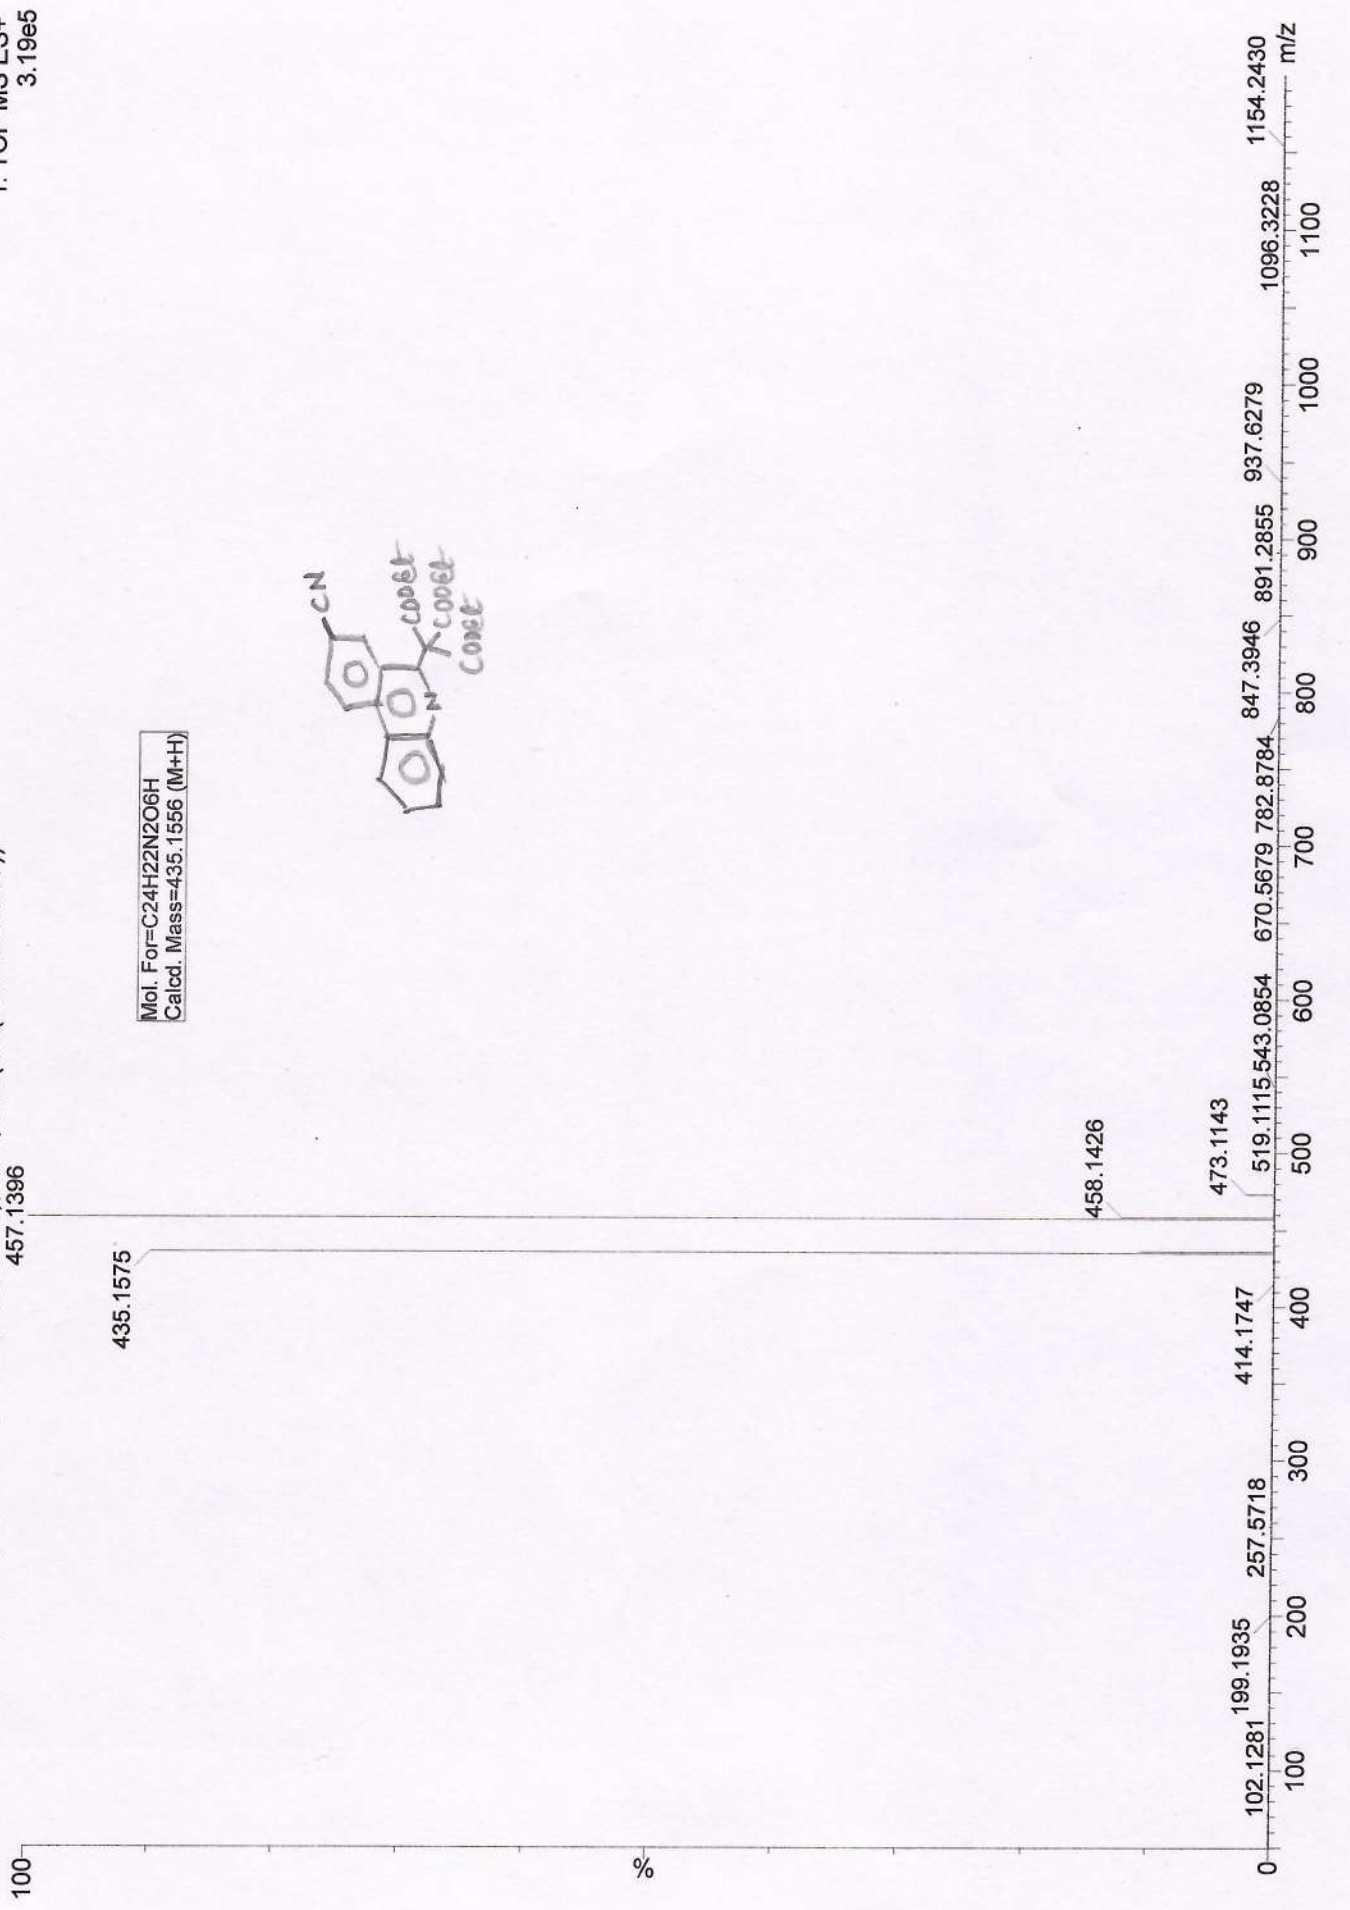

Mol. For=C<sub>24</sub>H<sub>22</sub>N<sub>2</sub>O<sub>6</sub>H  
Calcd. Mass=435.1556 (M+H)

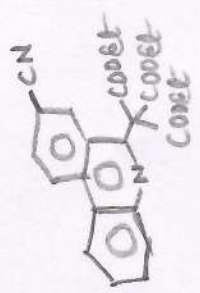



SM-05-339 B

IISc Organic Chemistry

07022024\_07 60 (0.571) AM2 (Ar, 22000.0, 556.28, 0.00, LS 10); ABS; Cm (60-(418:426+3:8))

100 474.1531

452.1713

Mol. For = C<sub>25</sub>H<sub>25</sub>NO<sub>7</sub>Na  
Calcd. Mass = 474.1529 (M+Na)

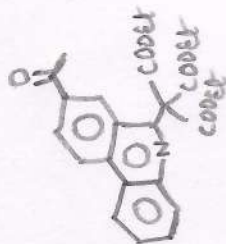

475.1562

490.1270

0 123.0932 229.1420 266.0776 334.1094353.2670

491.1329 537.1456 636.2827 670.2767 798.3703

888.2299 925.3217 959.6721 m/z

07-Feb-2024  
1: TOF MS ES+  
6.72e5

SM-05-342 B-1

09022024\_43 67 (0.631) AM2 (Ar, 22000.0, 556.28, 0.00, LS 10); ABS; Cm (67-(420:428+6:13))

IISc Organic Chemistry

08-Feb-2024

1: TOF MS ES+

4.66e5

Mol. For=C<sub>23</sub>H<sub>21</sub>Cl<sub>2</sub>N<sub>2</sub>O<sub>6</sub>Na  
Calcd. Mass=500.0644 (M+Na)

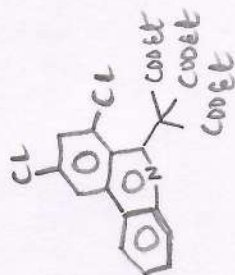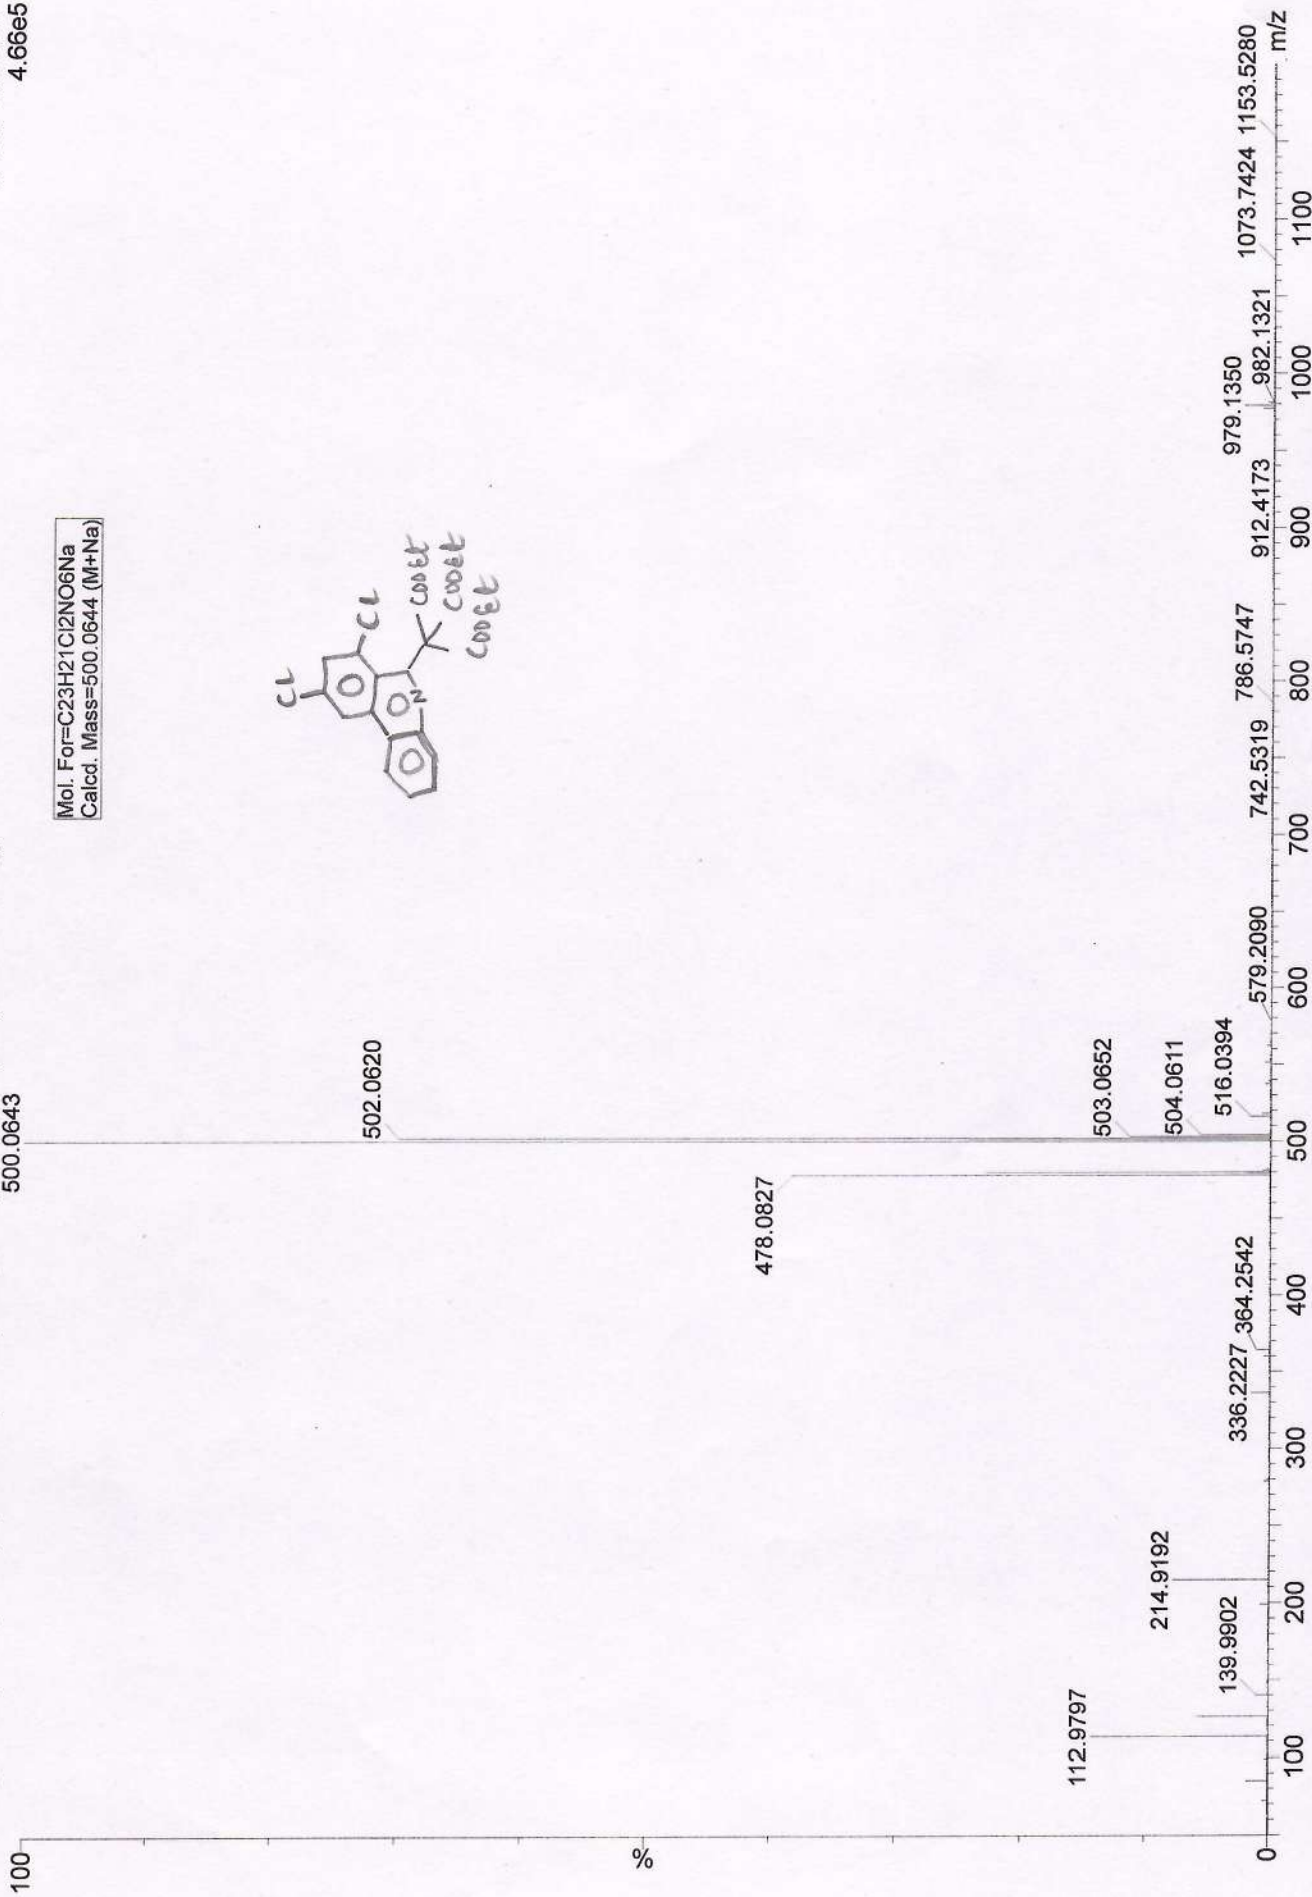

SM-05-367 B

IISc Organic Chemistry

12-Feb-2024

12022024\_05\_82 (0.779) AM2 (Ar,22000.0,556.28,0.00,LS 10); ABS; Cm (82-(412.418+12.17))

1: TOF MS ES+  
8.42e4

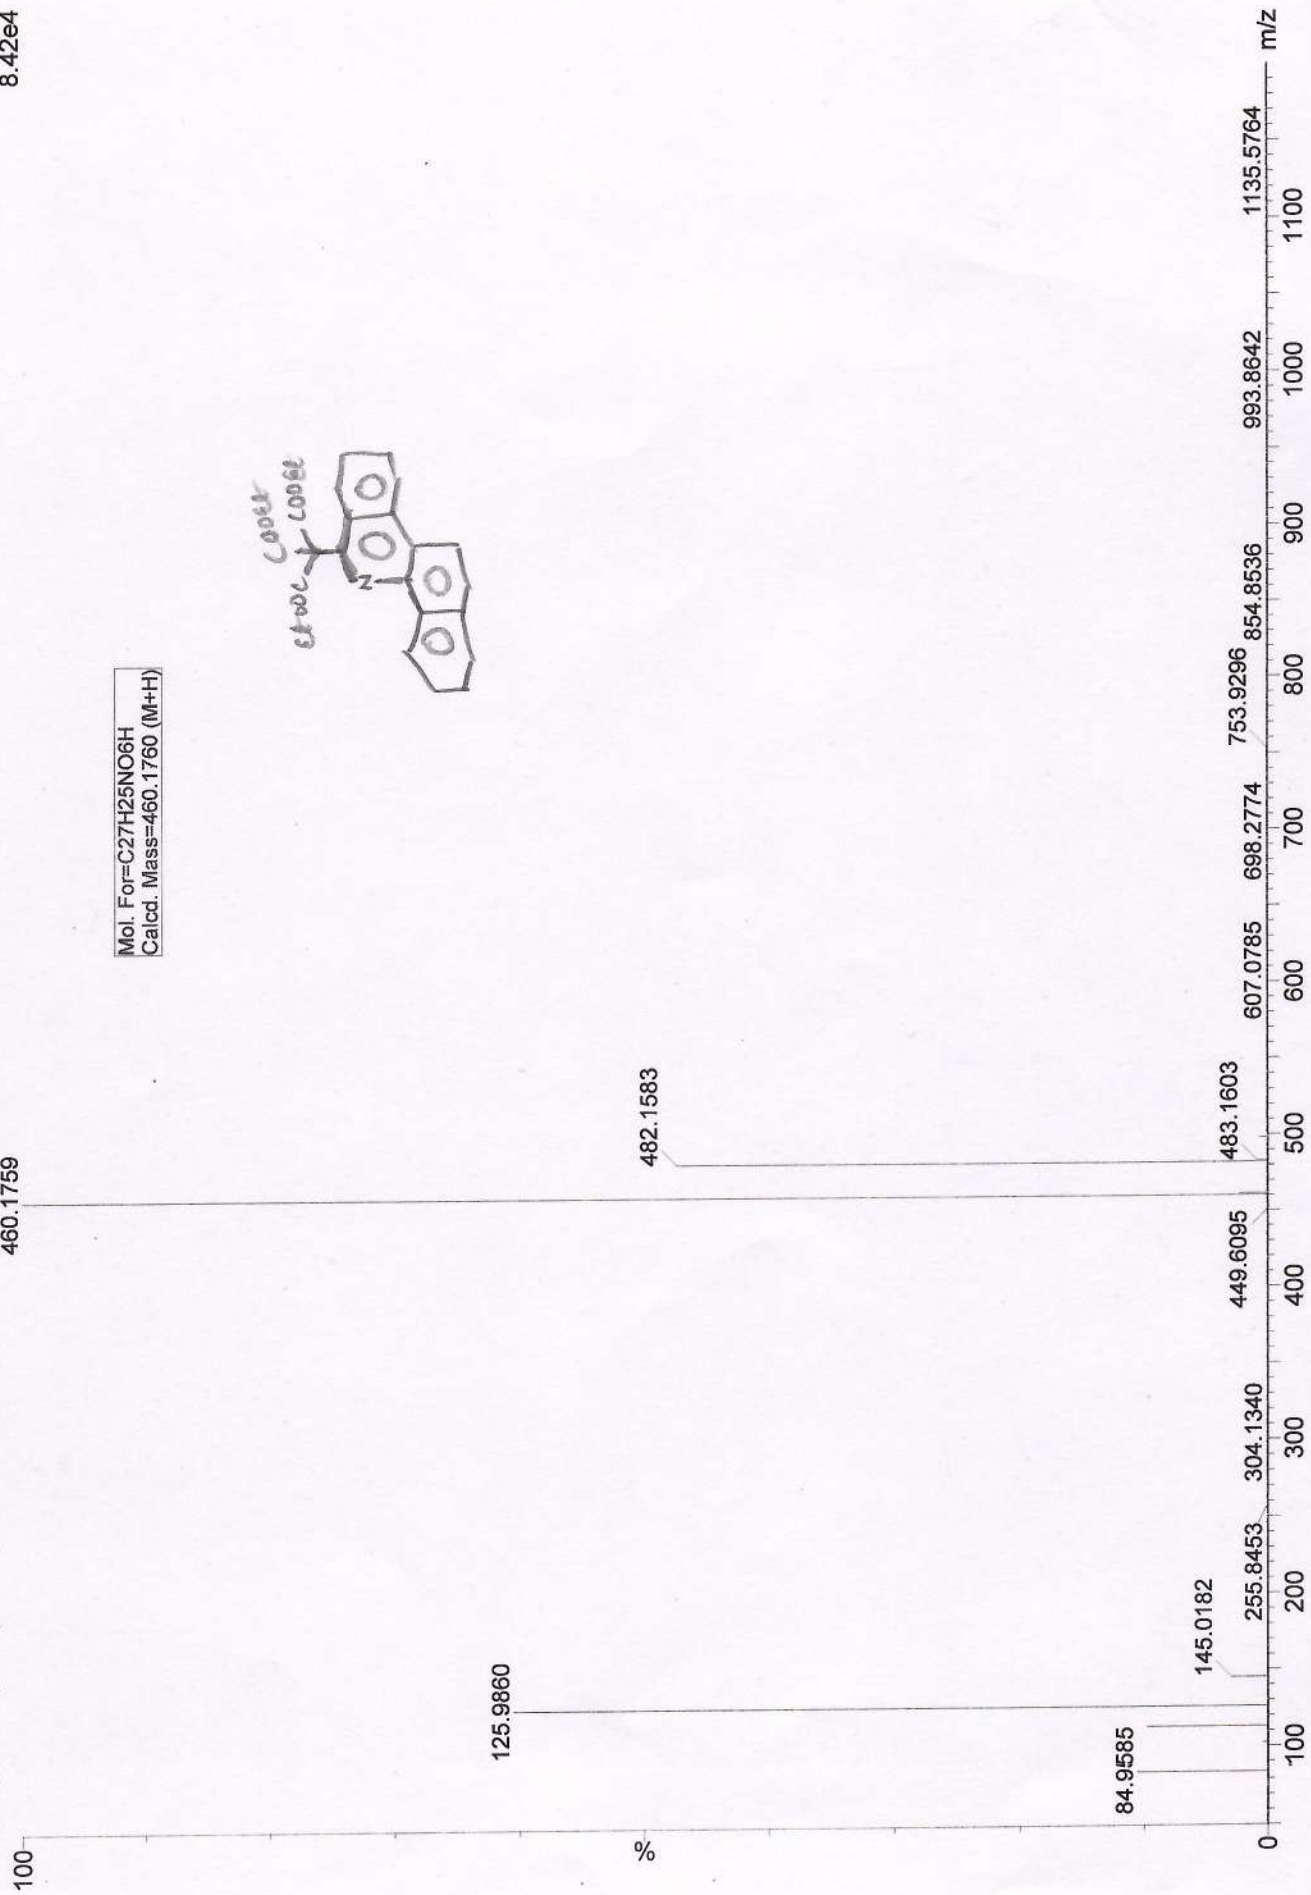

SM-05-392-B

IISc Organic Chemistry

15-Feb-2024

15022024\_40 64 (0.605) AM2 (Ar,22000.0,556.28,0.00,LS 10); ABS; Cm (64-(409:422+8:17))

1: TOF MS ES+

454.1865

100

Mol. For= C25H27NO7H  
Calcd. Mass= 454.1866 (M+H)

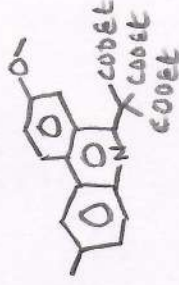

%

455.1902

476.1689

477.1711 544.1974

408.1469

287.0840 336.1238

125.9842

100

0

m/z

1100

1000

900

800

700

600

500

400

300

200

100

929.3521



SM-05-369B

IISc Organic Chemistry

14-Feb-2024

14022024\_4166 (0.622) AM2 (Ar, 22000.0, 556.28, 0.00, LS 10); ABS; Cm (66-(1:15+404:424))

1: TOF MS ES+

471.1533

1.66e6

Mol. For= C<sub>25</sub>H<sub>24</sub>N<sub>2</sub>O<sub>6</sub>Na  
Calcd. Mass= 471.1532 (M+Na)

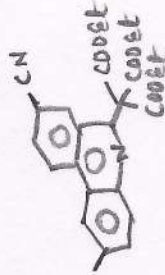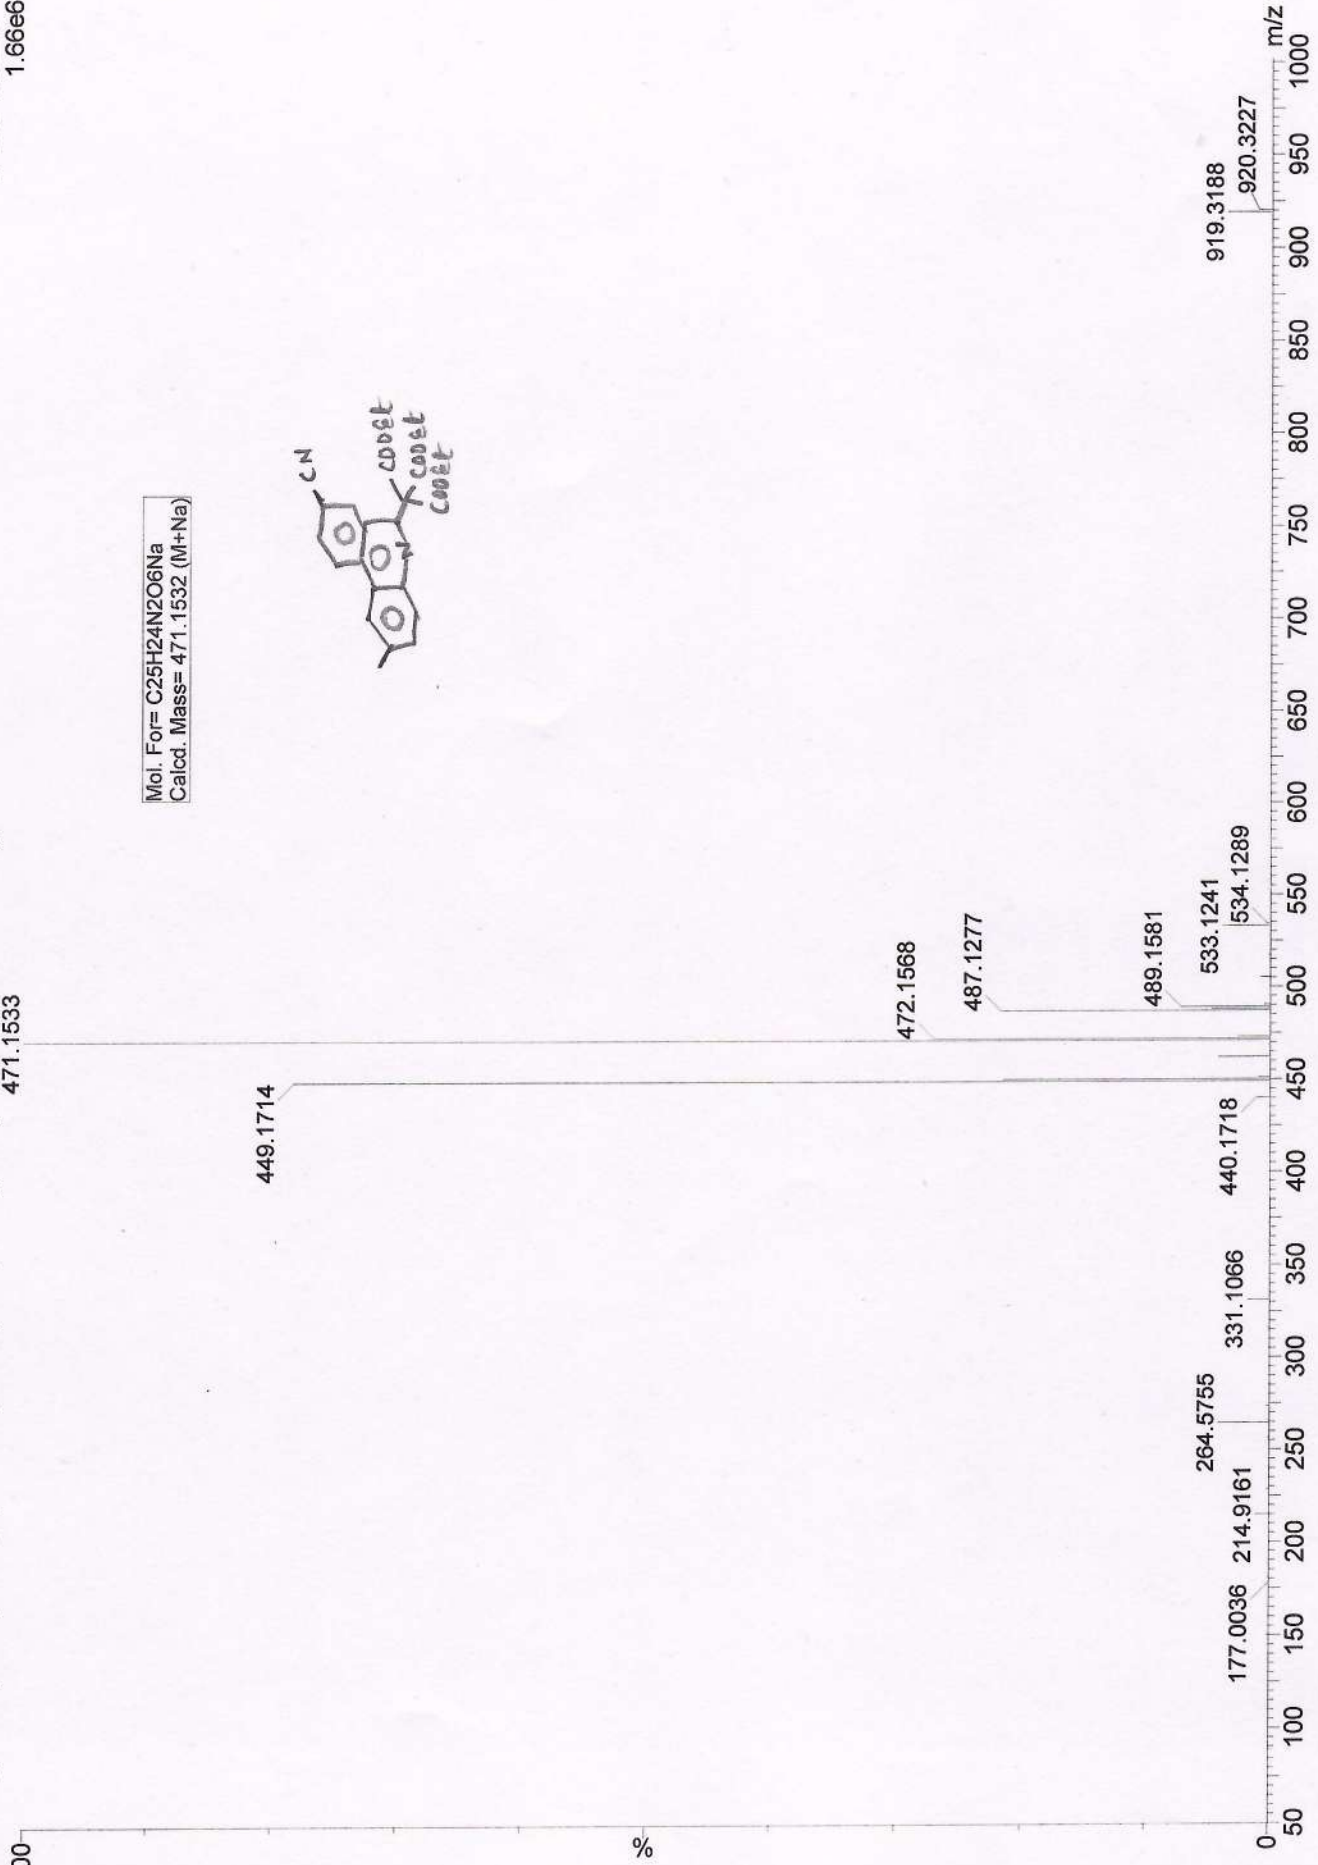

SM-05-370-B

IISc Organic Chemistry

14-Feb-2024

14022024\_42 59 (0.562) AM2 (Ar, 22000, 0.556, 28, 0.00, LS 10); ABS; Cm (59-(1:10+409:434))

1: TOF MS ES+  
9.07e6

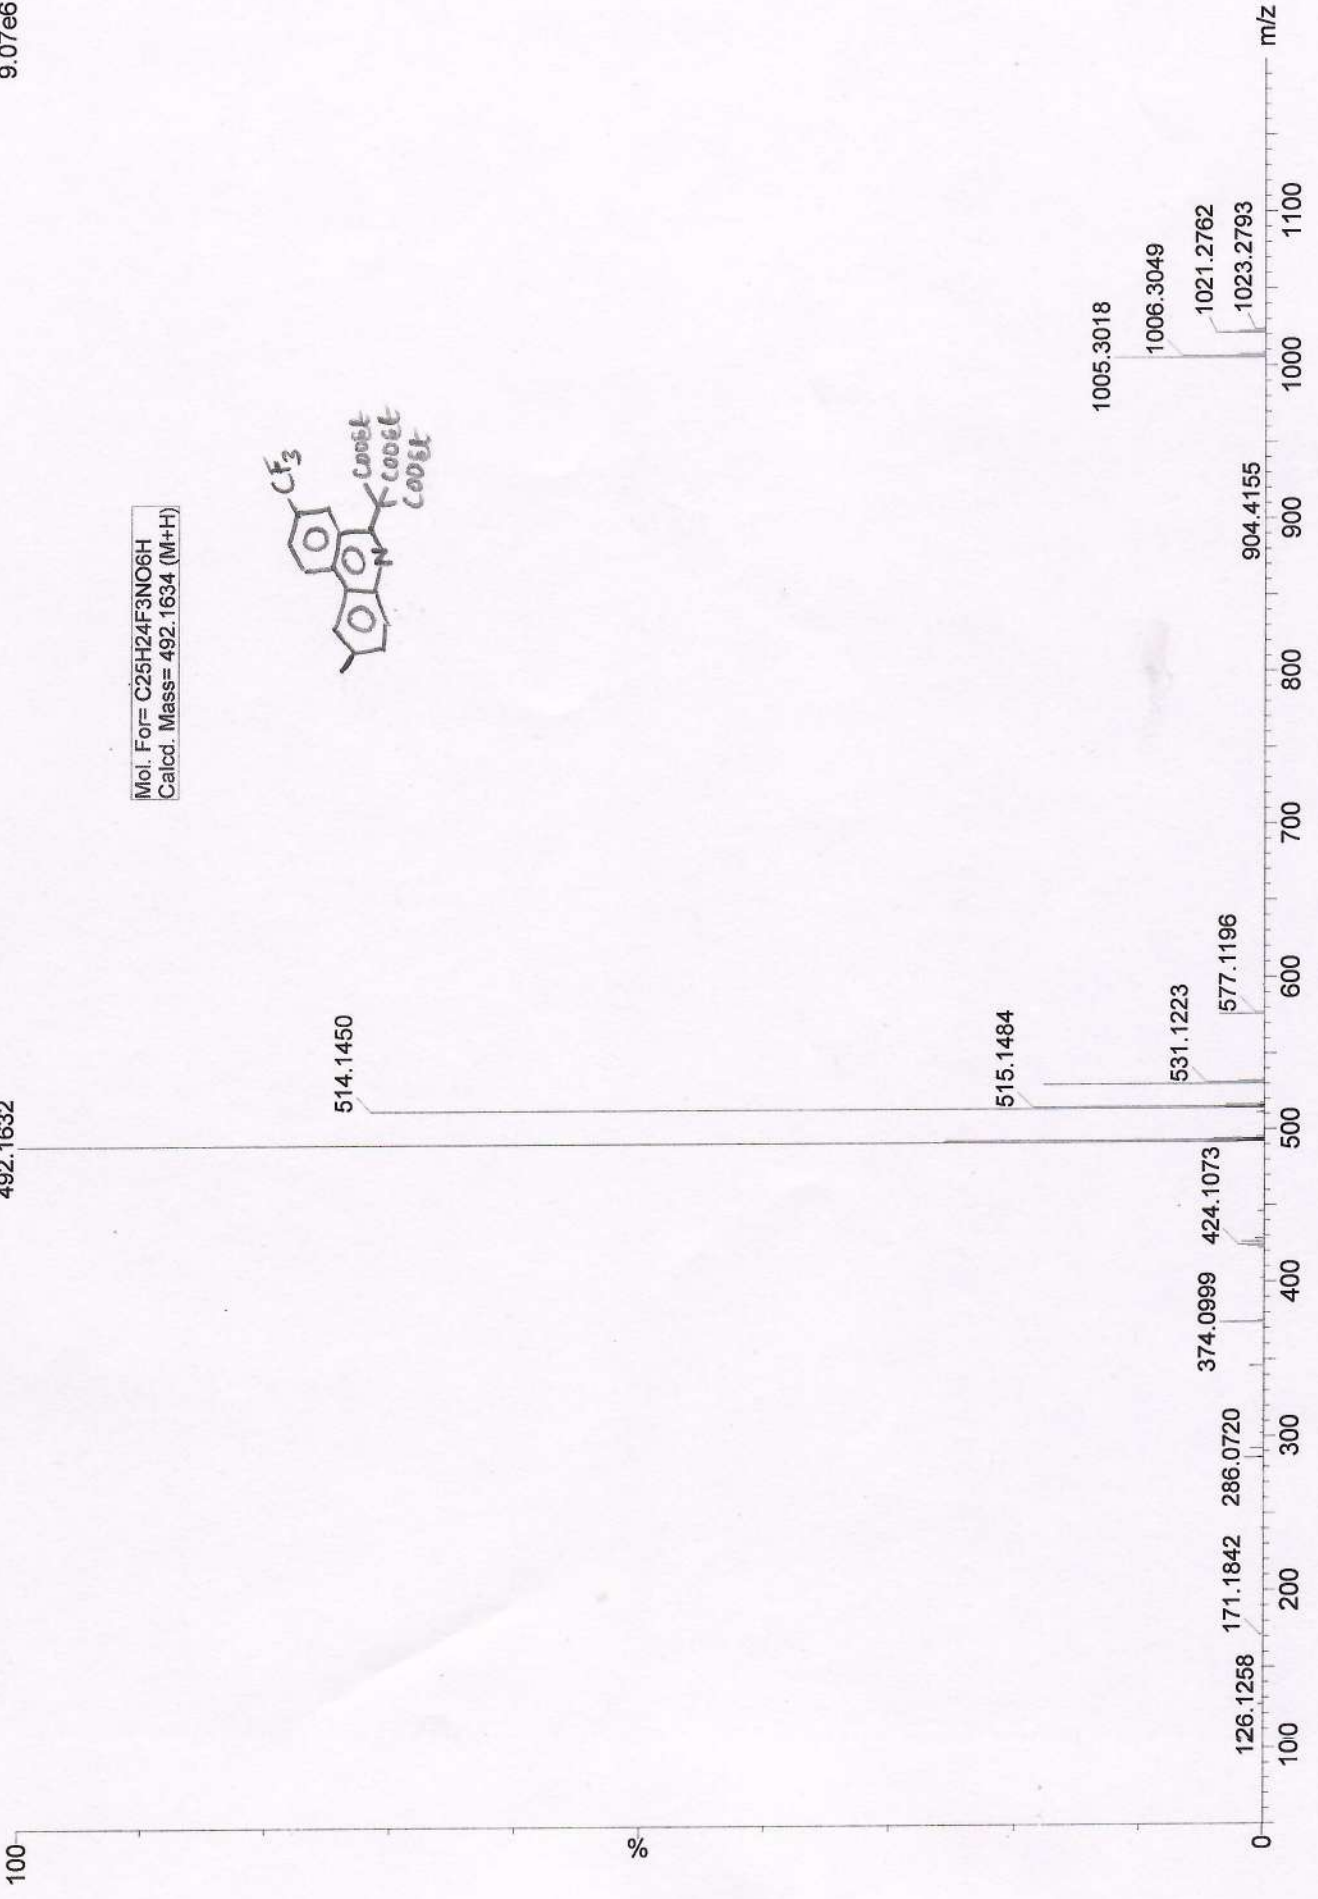

Mol. For= C<sub>25</sub>H<sub>24</sub>F<sub>3</sub>NO<sub>6</sub>H  
Calcd. Mass= 492.1634 (M+H)

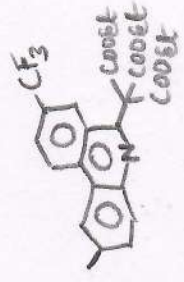

15-Feb-2024  
1: TOF MS ES+  
2.22e6

Mol. For= C<sub>34</sub>H<sub>41</sub>NO<sub>8</sub>H  
Calcd. Mass= 592.2910 (M+H)

IIsc Organic Chemistry  
592.2913

SM-05-391-B  
15022024\_39 62 (0.588) AM2 (A1,22000.0,556.28,0.00,LS 10); ABS; Cm (62-(422:433+1:16))

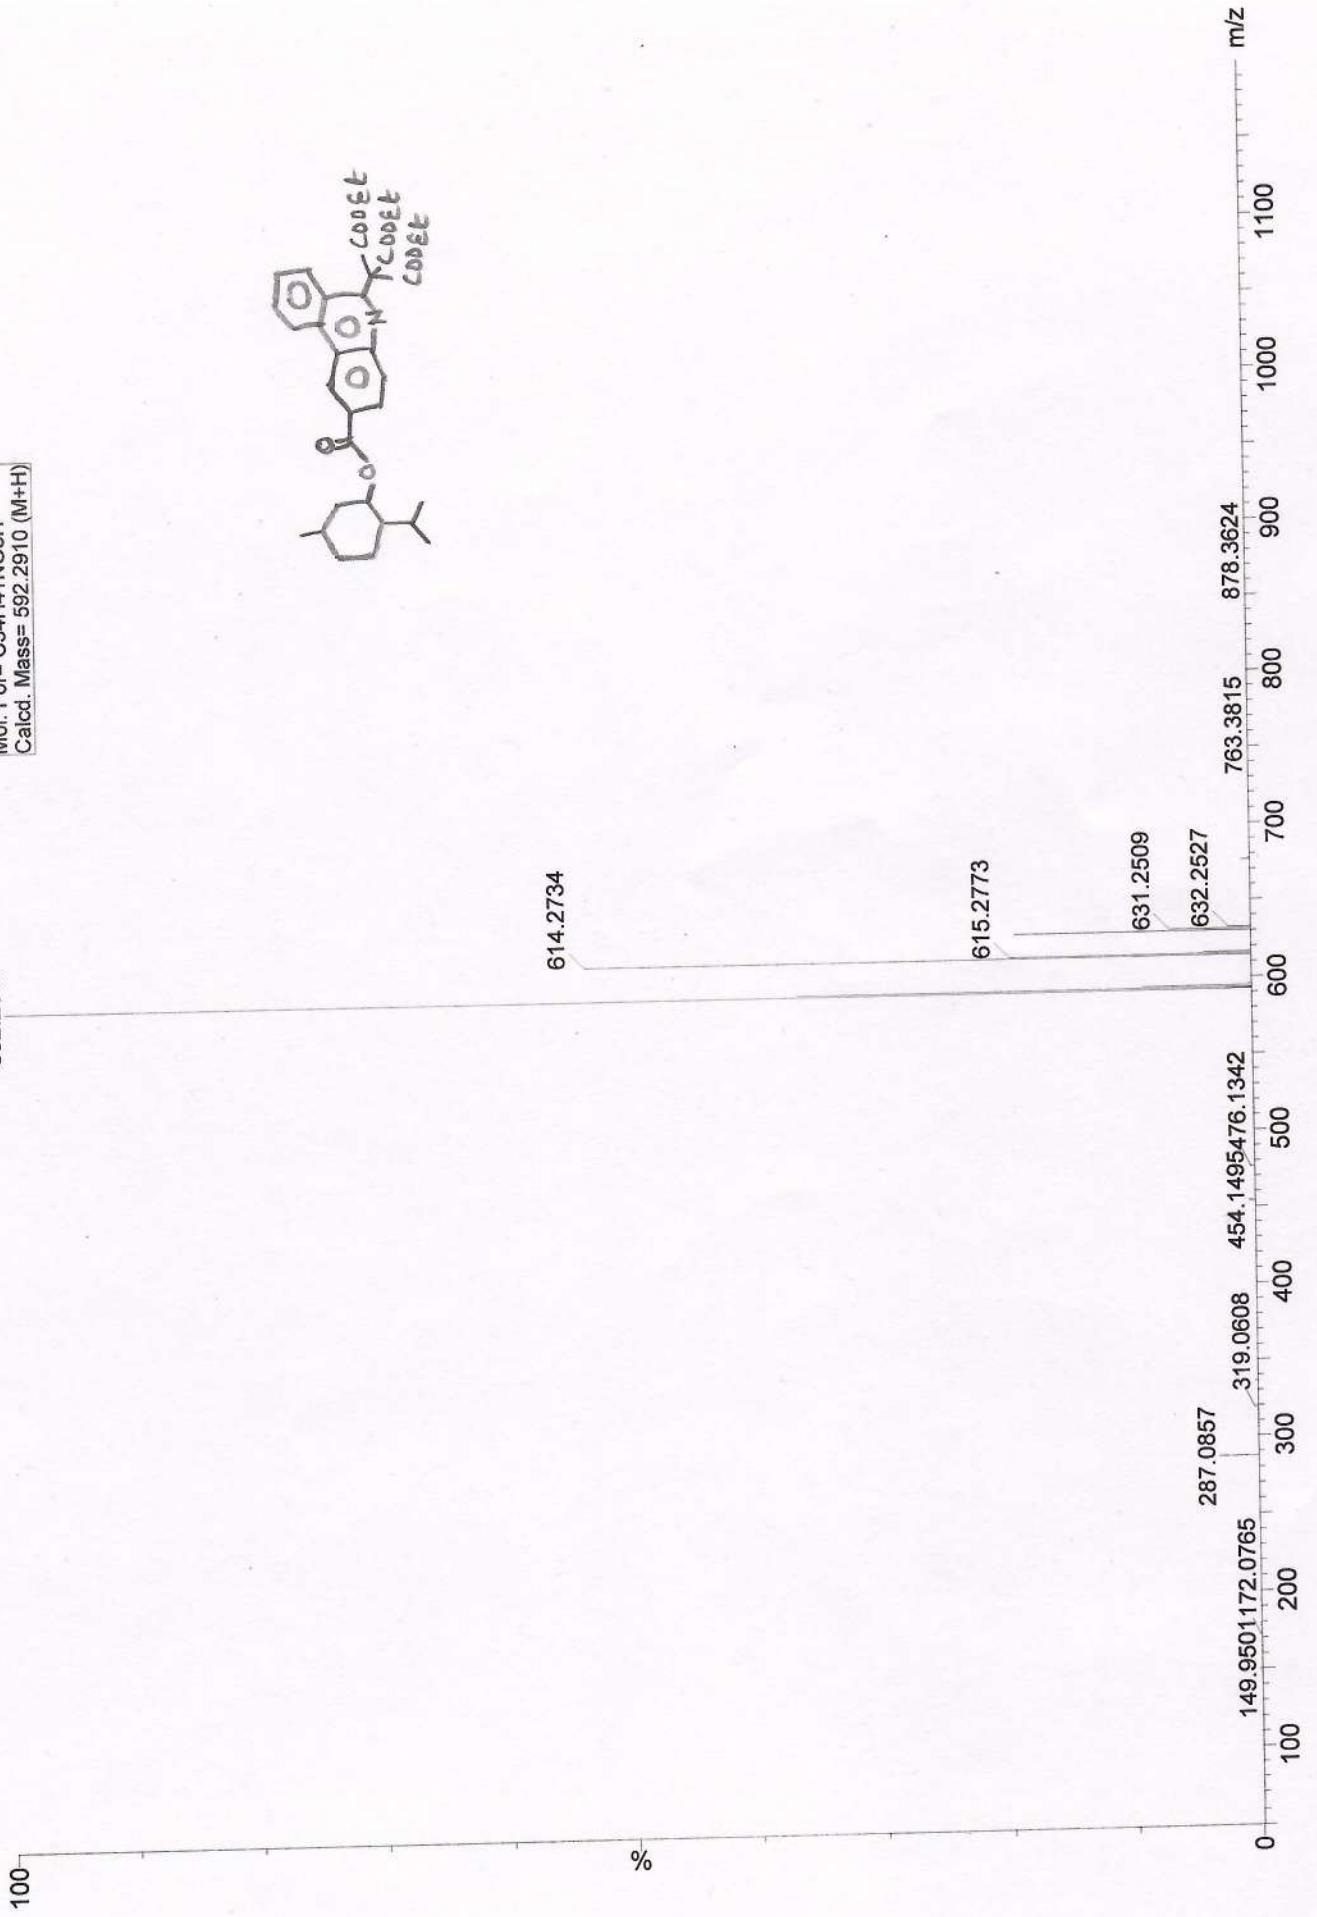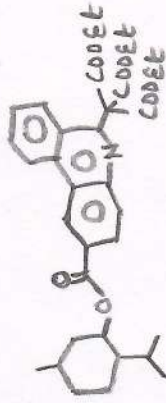

SM-05-346 B

IISc Organic Chemistry

09-Feb-2024

10022024\_30\_64 (0.605) AM2 (Ar,22000.0,556.28,0.00,LS 10); ABS; Cm (64-(413:419+9:19))

1: TOF MS ES+  
2.49e5

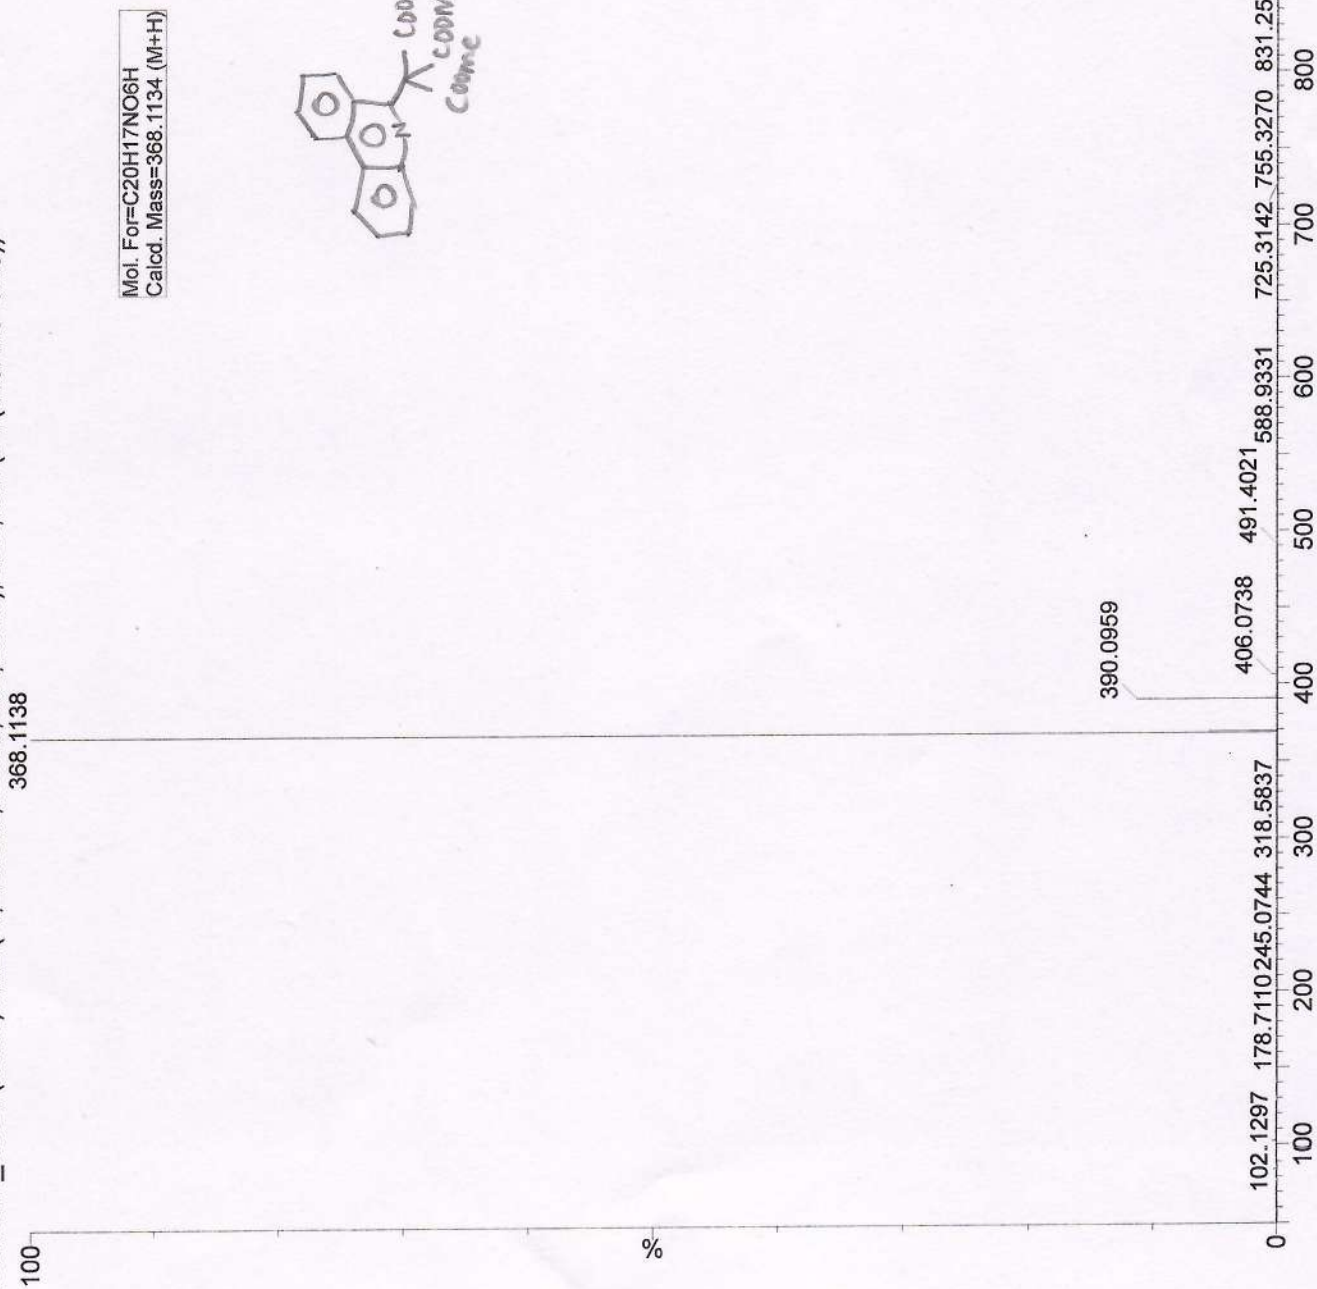



SM-05-348

IIsc Organic Chemistry

22032024\_15 57 (0.545) AM2 (Ar,22000,0.556,28,0.00,LS 10); ABS; Cm (57-(8:32+399:423))

100

396.1448

Mol.For= C22H21NO6H  
Calcd.Mass= 396.1447 (M+H)

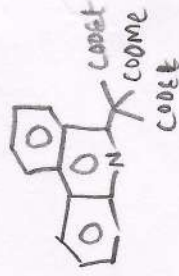

%

434.1869

116.1179

435.1895

112.1118 117.1226 174.6759

0

m/z 1000 950 900 850 800 750 700 650 600 550 500 450 400 350 300 250 200 150 100

22-Mar-2024  
1: TOF MS ES+  
7.28e5

SM-05-383B-1

IISc Organic Chemistry

10-Mar-2023  
1: TOF MS ES+  
2.91e6

10032023\_01 112 (1.056) AM2 (Ar, 22000.0, 556.28, 0.00, LS 10); Cm (112-(362.416+21.39))

508.1973

Mol. For = C<sub>28</sub>H<sub>29</sub>NO<sub>8</sub>H  
Calcd. Mass = 508.1971 (M+H)

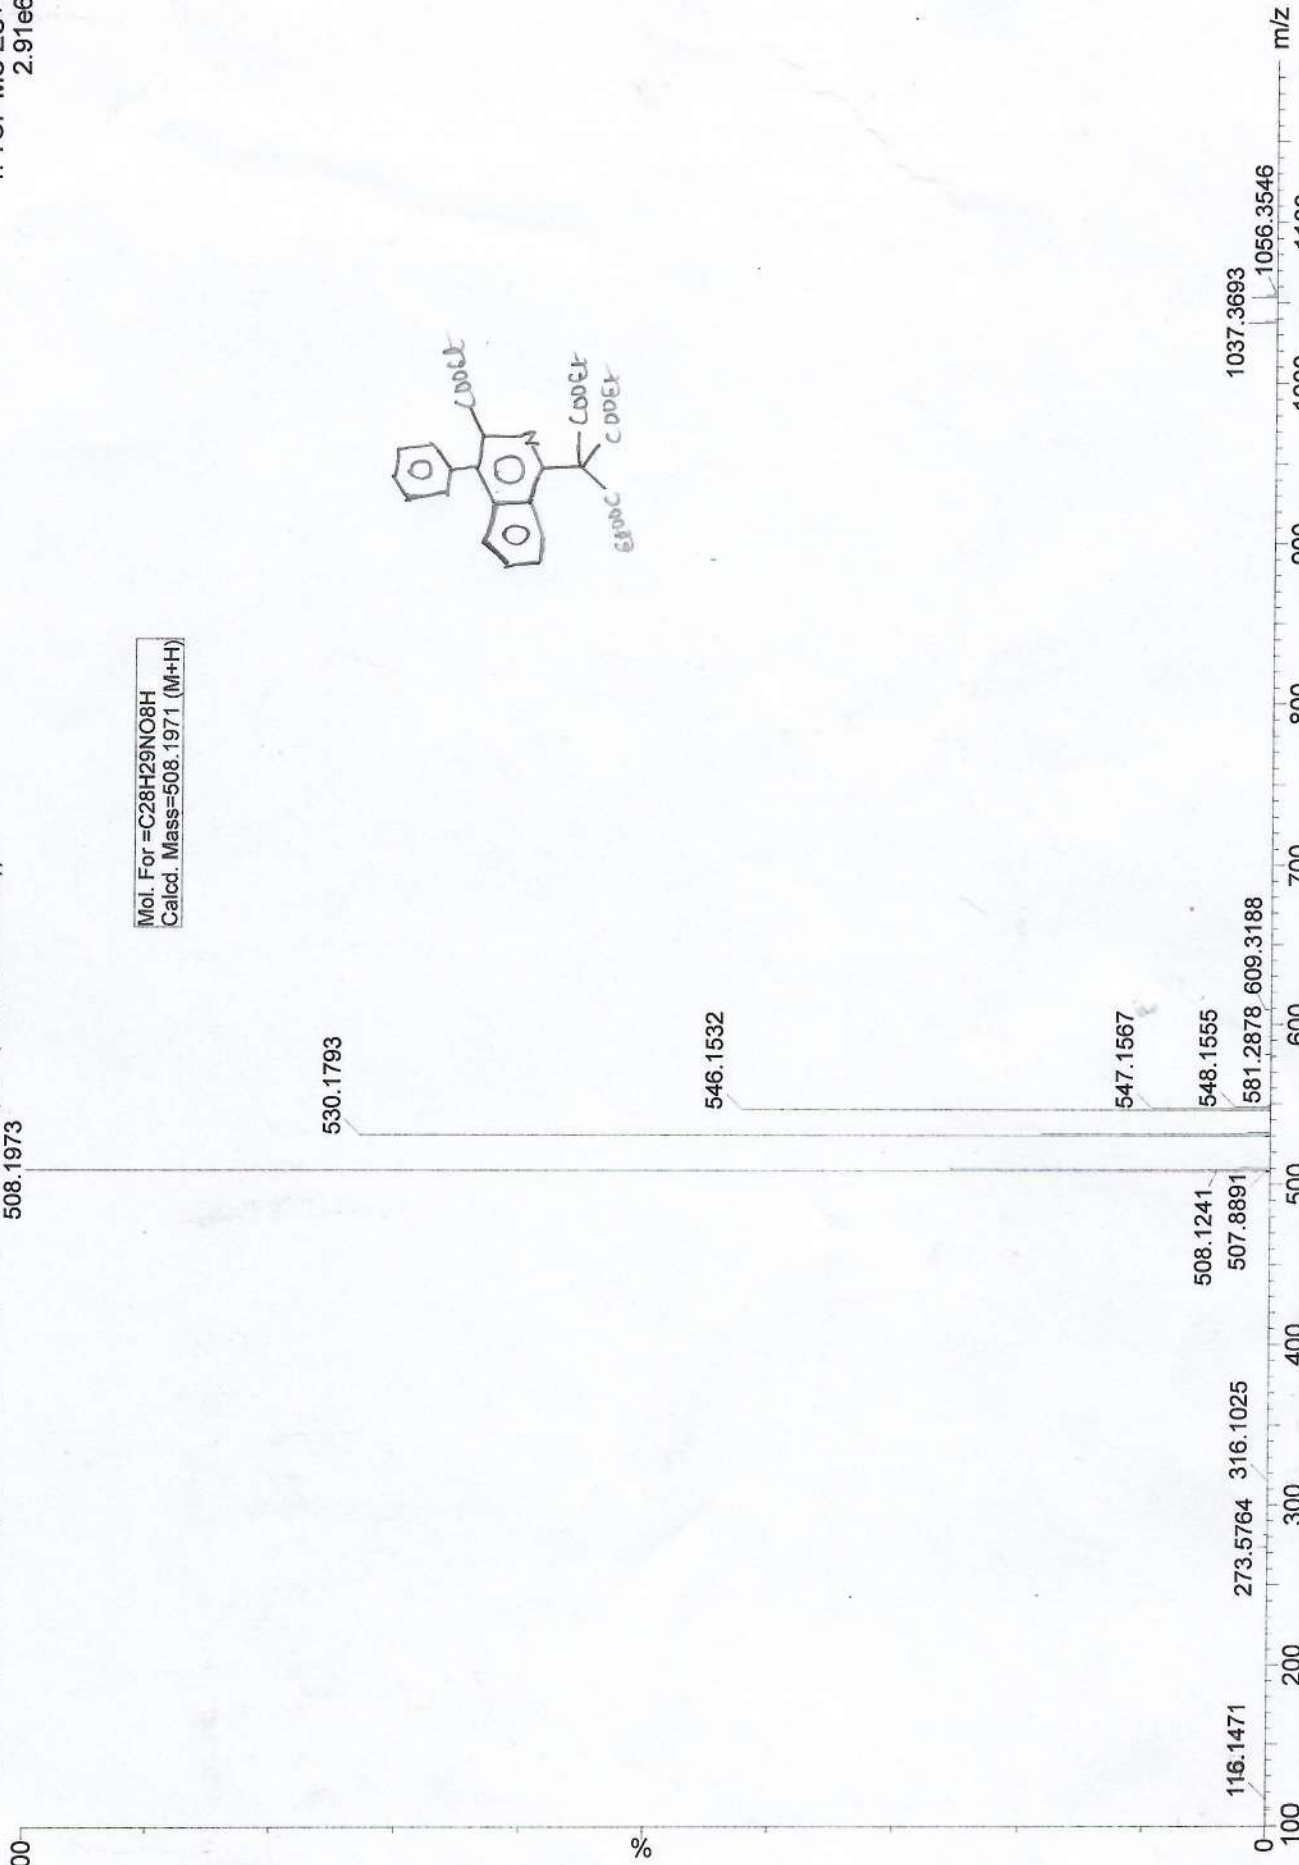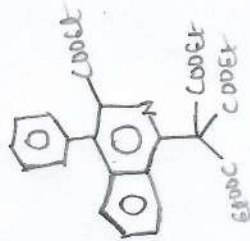

SM-05-386-B

IISc Organic Chemistry

14022024\_43 101 (0.942) AM2 (Ar, 22000, 0.556, 28, 0.00, LS 10); ABS; Cm (101-(1:2+420:428))

14-Feb-2024

1: TOF MS ES+

516.1637

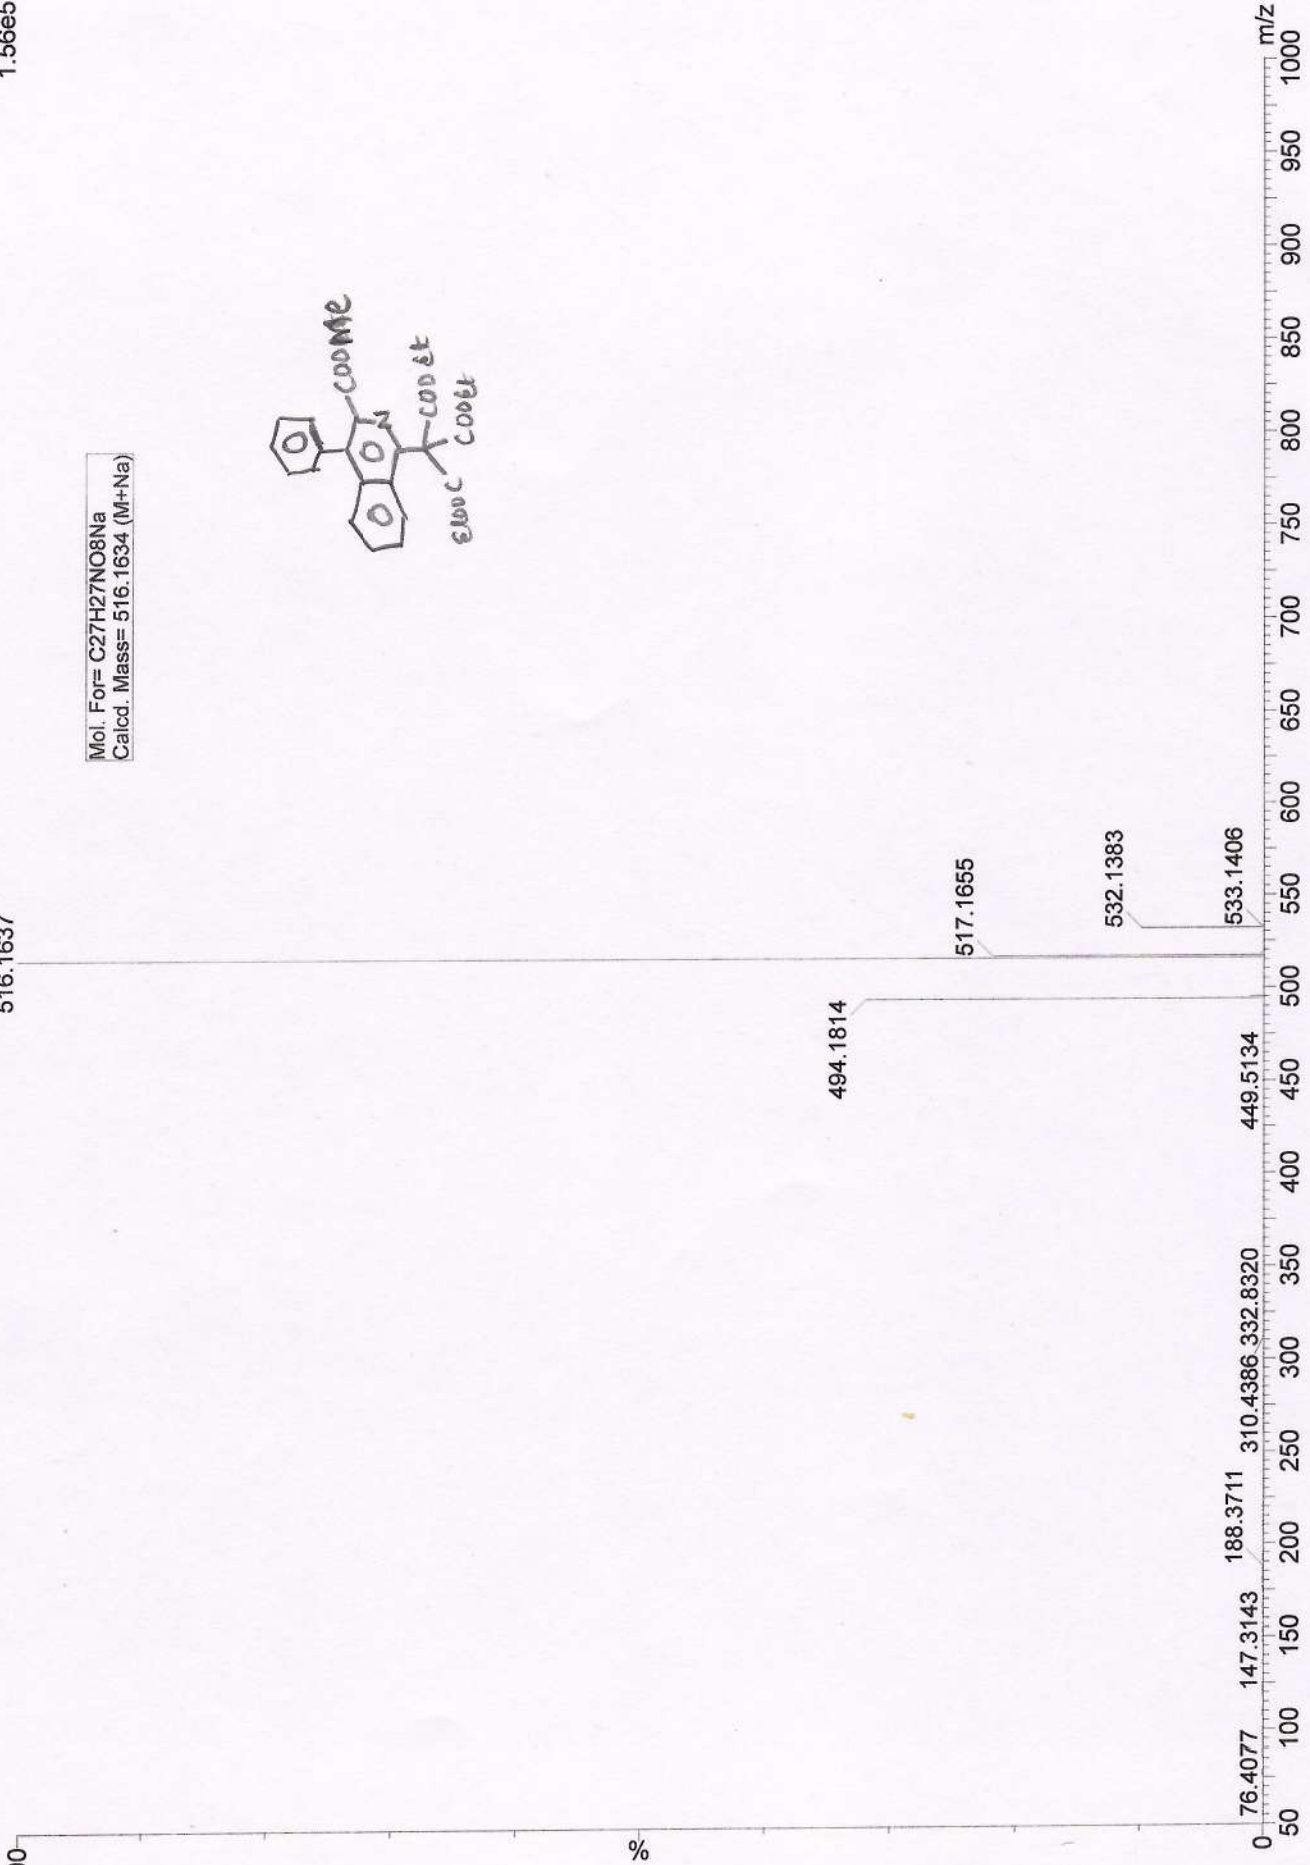

Mol. For= C27H27NO8Na  
Calcd. Mass= 516.1634 (M+Na)

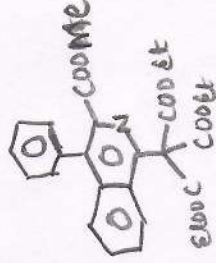

SM-05-387B

14022024\_45 67 (0.631) AM2 (Ar,22000.0,556.28,0.00,LS 10); ABS; Cm (67-(1:7+405:420))

14-Feb-2024  
1: TOF MS ES+  
4.19e6

IISc Organic Chemistry

474.1165

Mol. For= C<sub>24</sub>H<sub>21</sub>NO<sub>8</sub>Na  
Calcd. Mass= 474.1165 (M+Na)

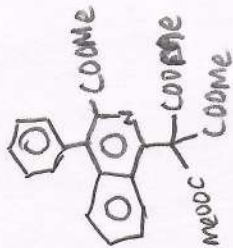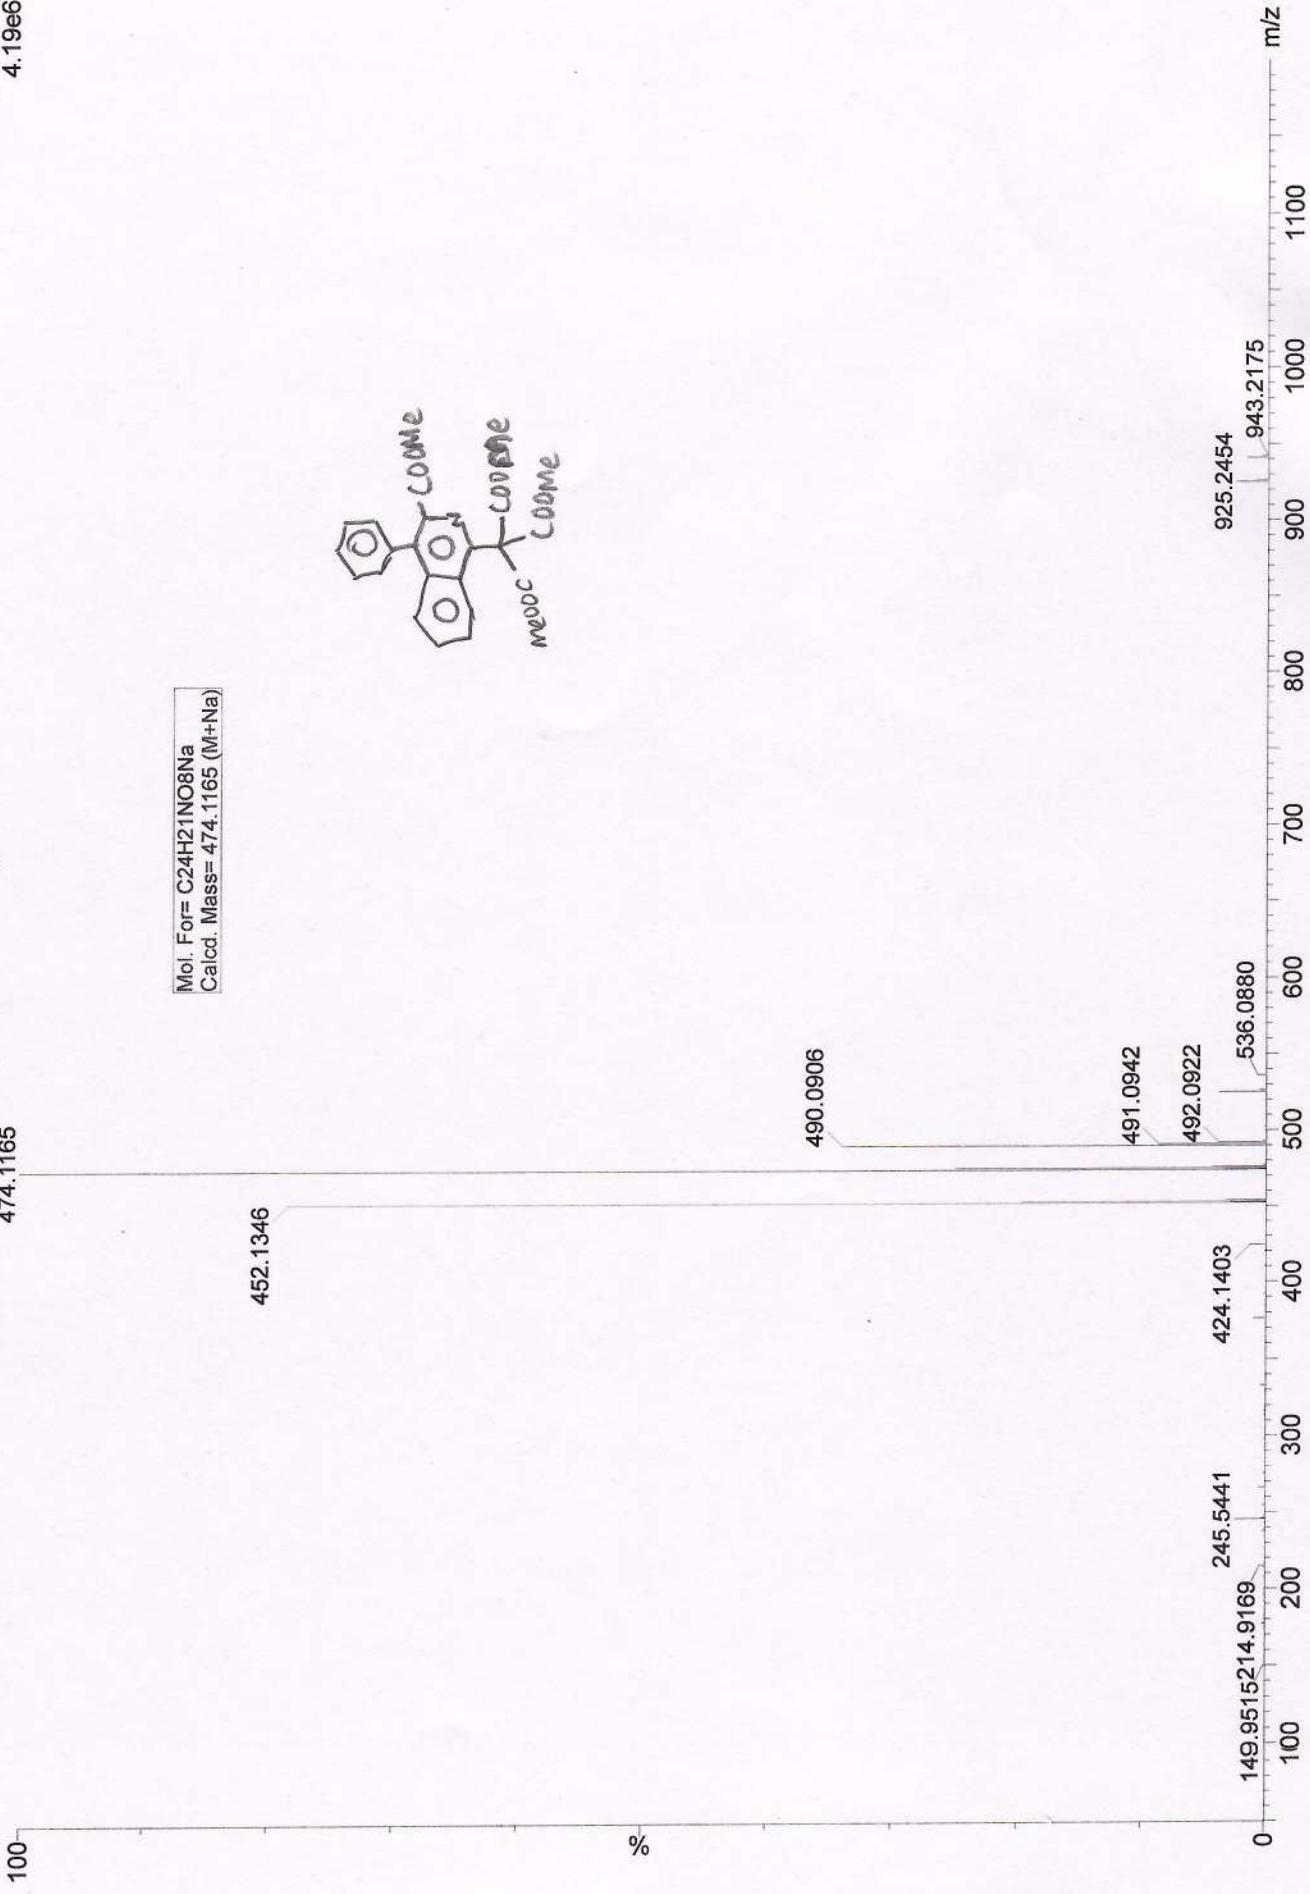



SM-05-390B

IISc Organic Chemistry

15-Feb-2024

15022024\_20 73 (0.682) AM2 (Ar, 22000.0, 556.28, 0.00, LS 10); ABS; Cm (73-(1:12+403:434))

1: TOF MS ES+  
2.82e6

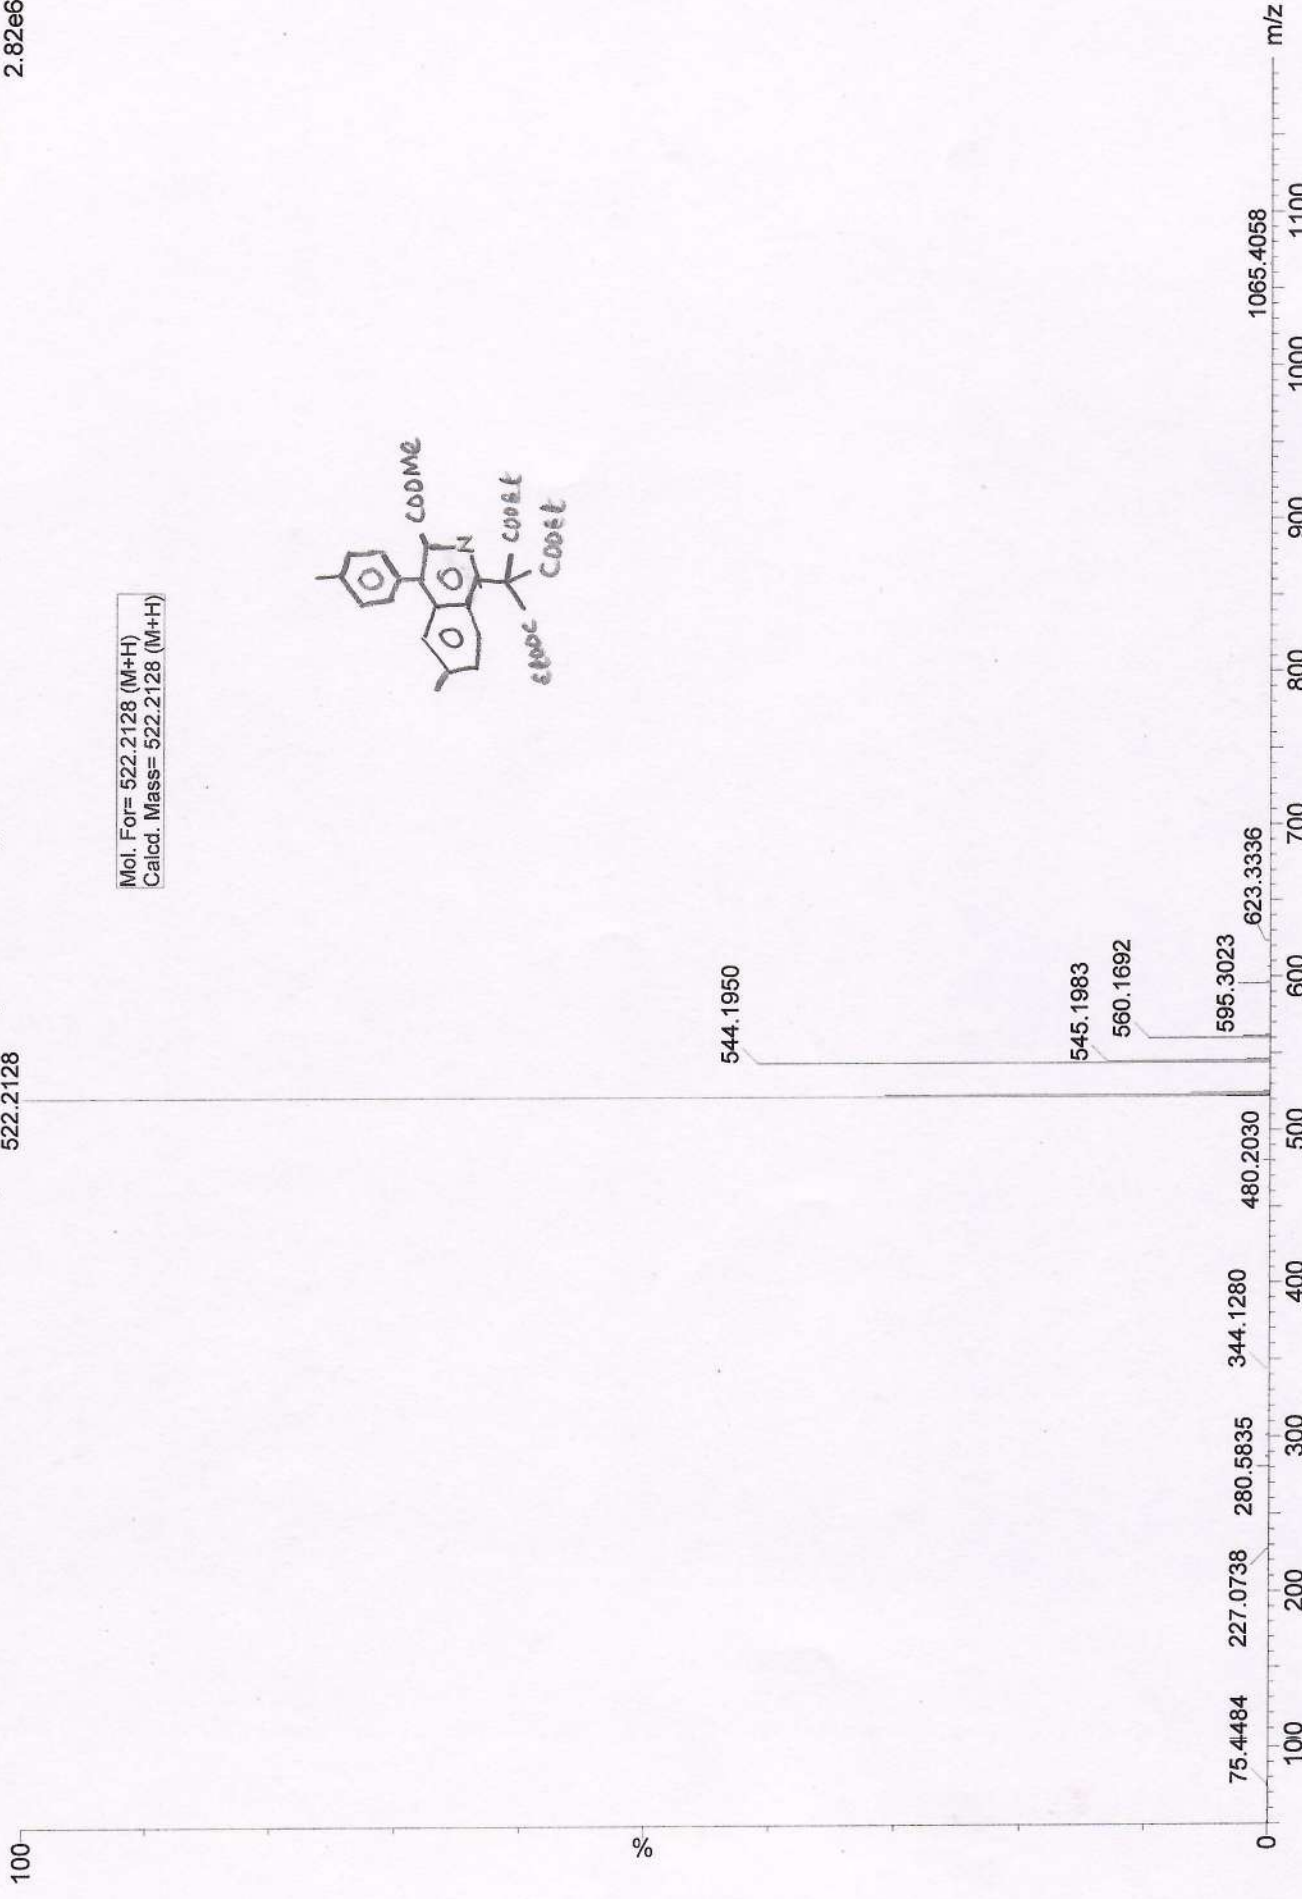

Mol. For= 522.2128 (M+H)  
Calcd. Mass= 522.2128 (M+H)

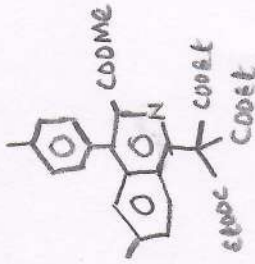

SM-05-389B

IISc Organic Chemistry

15022024\_19 68 (0.640) AM2 (Ar,22000.0,556.28,0.00,LS 10); ABS; Cm (68-(1:24+381:407))

530.1624

15-Feb-2024

1: TOF MS ES+  
4.71e6

Mol. For= C<sub>27</sub>H<sub>25</sub>F<sub>2</sub>N<sub>2</sub>O<sub>8</sub>H  
Calcd. Mass= 530.1626 (M+H)

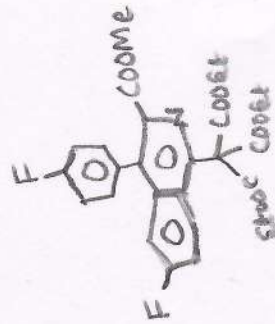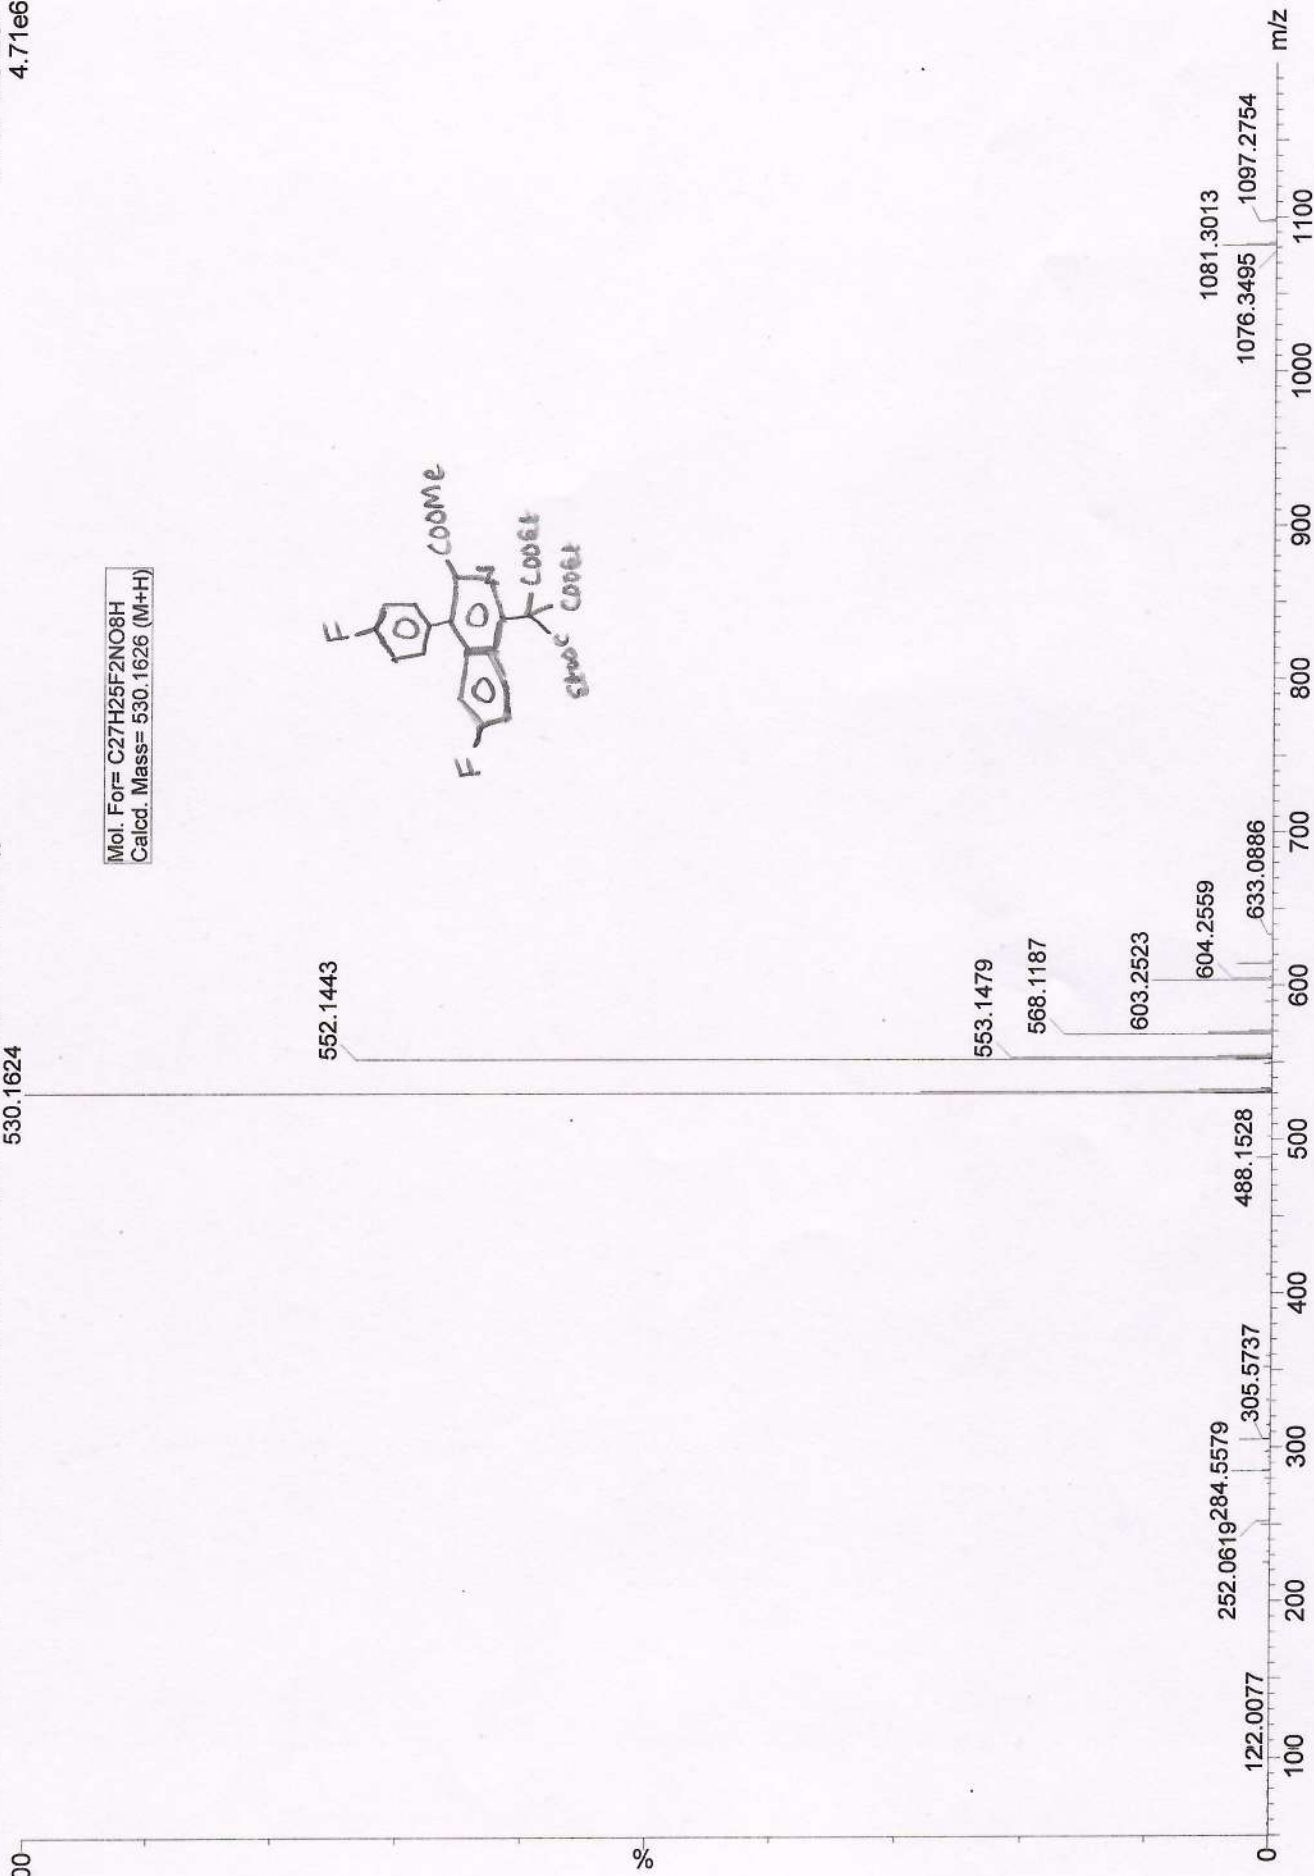

HSR-M-102

25032024\_27 72 (0.674) AM2 (Ar, 22000.0, 556.28, 0.00, LS 10); ABS; Cm (72-(408:423+10:18))

25-Mar-2024  
1: TOF MS ES+  
5.50e6

Mol.Fo<sub>r</sub>= C<sub>21</sub>H<sub>21</sub>NO<sub>4</sub>H  
Calcd.Mass= 352.1549 (M+H)

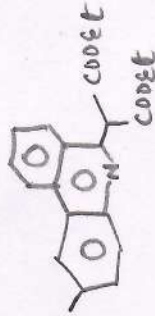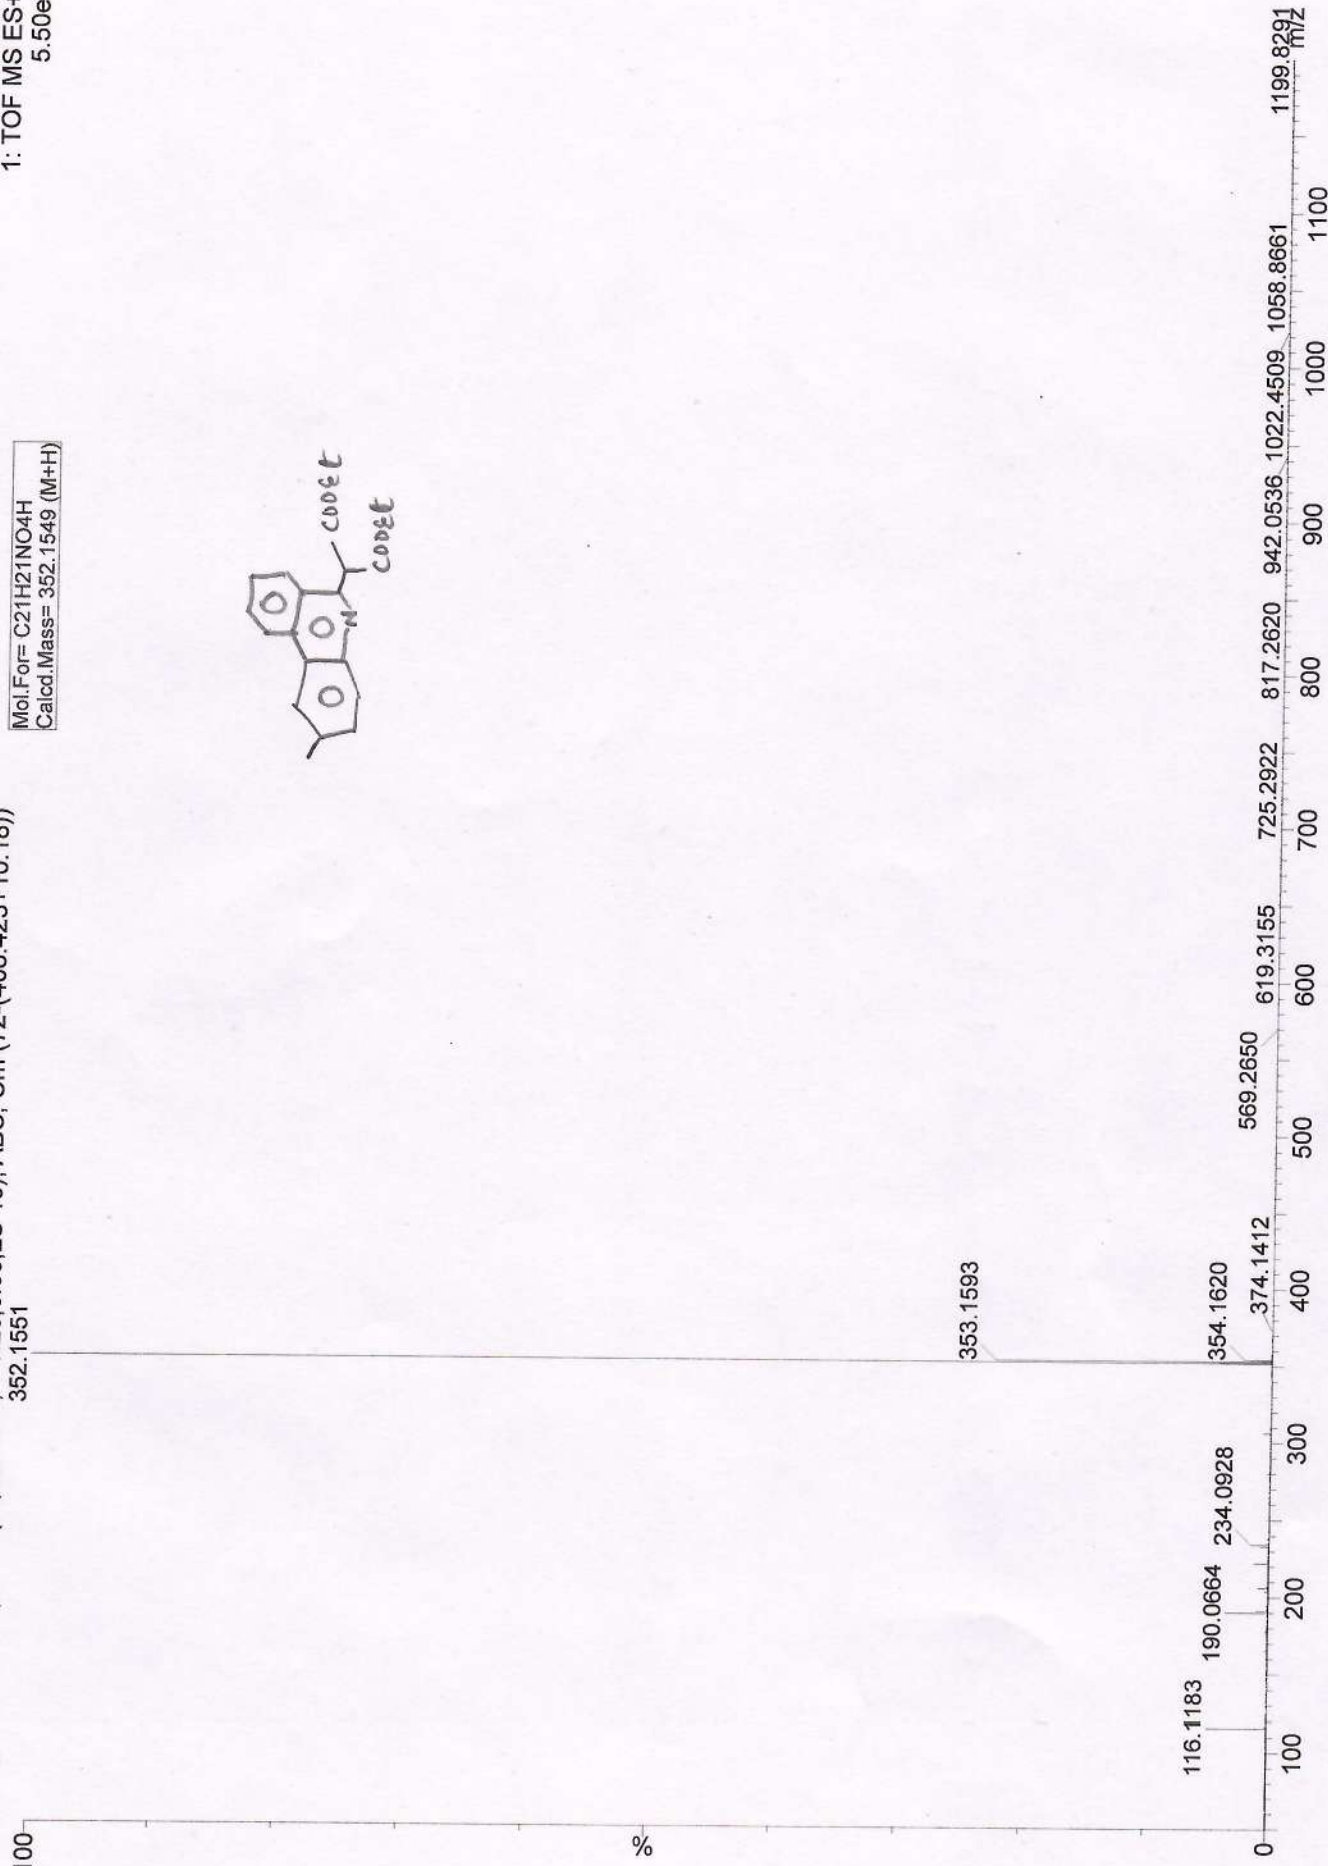

23-Jul-2024  
1: TOF MS ES+  
3.24e6

IISc Organic Chemistry

HSR-M-133(R)  
23072024\_21 62 (0.588) AM2 (Ar, 15000.0, 556.28, 0.00, LS 10); ABS; Cm (62-(1:9+416:426))

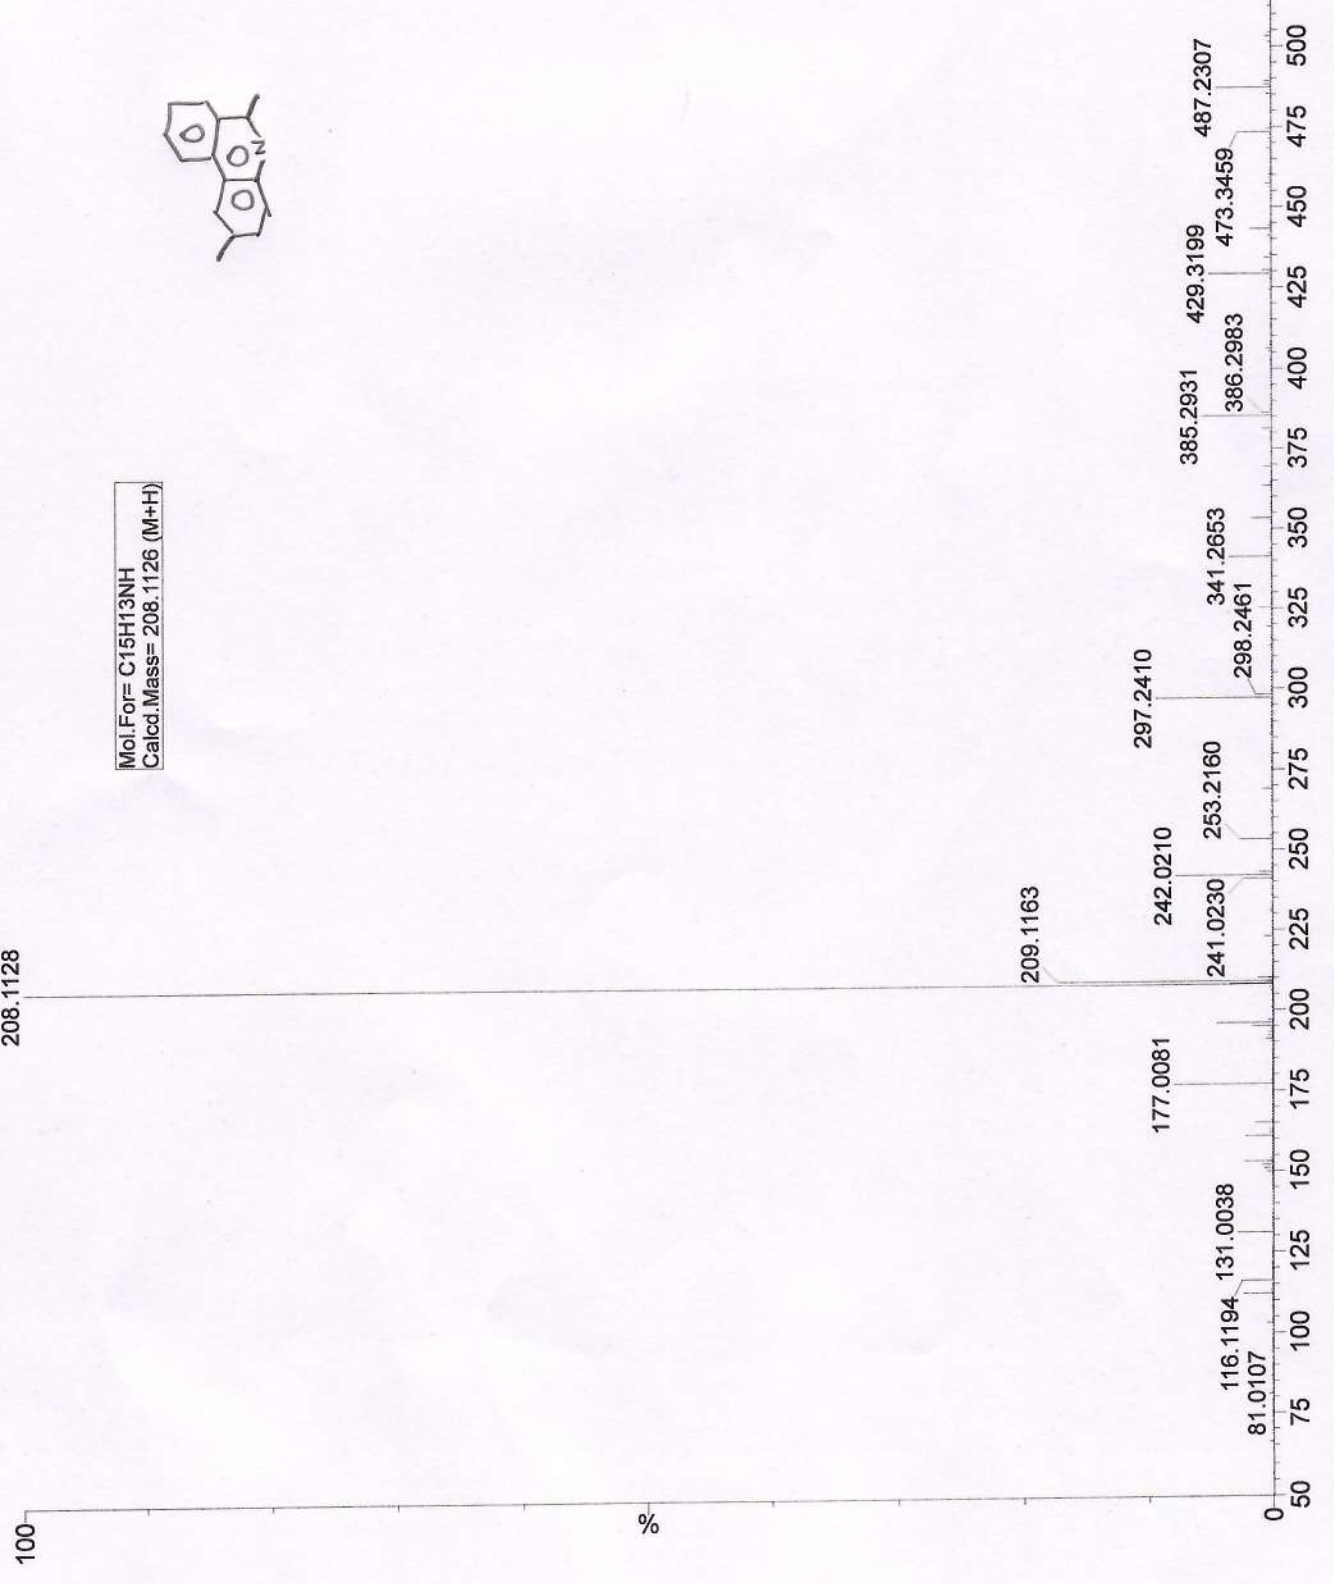

Mol. For= C<sub>15</sub>H<sub>13</sub>NH  
Calcd. Mass= 208.1126 (M+H)

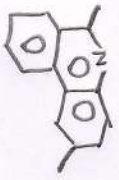

Supplement: d4ob01405g1.pdf [file d4ob01405g1.pdf]
