# Supplementary material for: Visible light-mediated radical addition cascade cyclization of aryl isocyanides with tricarbonyls: rapid access to substituted phenanthridines and isoquinolines
Source: Royal Society of Chemistry journal article supplement (doi:10.1039/d4ob01405g), 2024-01-01

# **Visible light-mediated radical addition cascade cyclization of aryl isocyanide with tricarbonyls: Rapid access to substituted phenanthridines and isoquinolines**

Sabyasachi Manna, Rahul Halanuru Sreedhara, and Kandikere Ramaiah Prabhu\*

Department of Organic Chemistry,

Indian Institute of Science,

Bangalore 560 012,

Karnataka, India

\*To whom correspondence should be addressed. E-mail: [prabhu@iisc.ac.in](mailto:prabhu@iisc.ac.in)

**Table of Contents:**

| <b>Sl.No</b> | <b>Title</b>                               | <b>Page No.</b> |
|--------------|--------------------------------------------|-----------------|
| 1            | General Experimental                       | SI-3            |
| 2            | Optimization and control studies           | SI-4            |
| 3            | General experimental procedure             | SI-8            |
| 4            | Characterization data for products         | SI-9            |
| 5            | Product modification                       | SI-16           |
| 6            | Mechanistic studies                        | SI-16           |
| 7            | Crystal data for <b>3fa</b>                | SI-18           |
| 8            | References                                 | SI-19           |
| 9            | <sup>1</sup> H and <sup>13</sup> C spectra | SI-20           |

## General Experimental

All reactions were carried out using distilled solvents. Reactions were monitored by using precoated silica TLC plates (GF-254). Mass spectra were recorded in EI and ESI (TOF) modes. NMR spectra were recorded in at 400 MHz spectrometers in  $\text{CDCl}_3$ ,  $\text{DMSO-d}_6$ , and tetramethylsilane (TMS;  $\delta = 0.00$  ppm) served as an internal standard for  $^1\text{H}$  NMR. The corresponding residual non-deuterated solvent signal ( $\text{CDCl}_3$ ;  $\delta = 77.00$  ppm and  $\text{DMSO-d}_6$ ;  $\delta = 39.52$  ppm) was used as an internal standard for  $^{13}\text{C}$  NMR. Column chromatography was carried out on silica gel 230-400 mesh or 100-200 mesh (Merck), and thin-layer chromatography was carried out using Silica Gel GF-254. Chemicals obtained from commercial suppliers were used without further purification. Aryl isocyanides were prepared according to the literature procedures.<sup>1</sup> and  $(\text{Ir}[\text{df}(\text{CF}_3)\text{ppy}]_2(\text{dtbpy}))\text{PF}_6$ <sup>2</sup> were prepared according to the literature reports.

### Emission Spectra of Blue LED Strip:

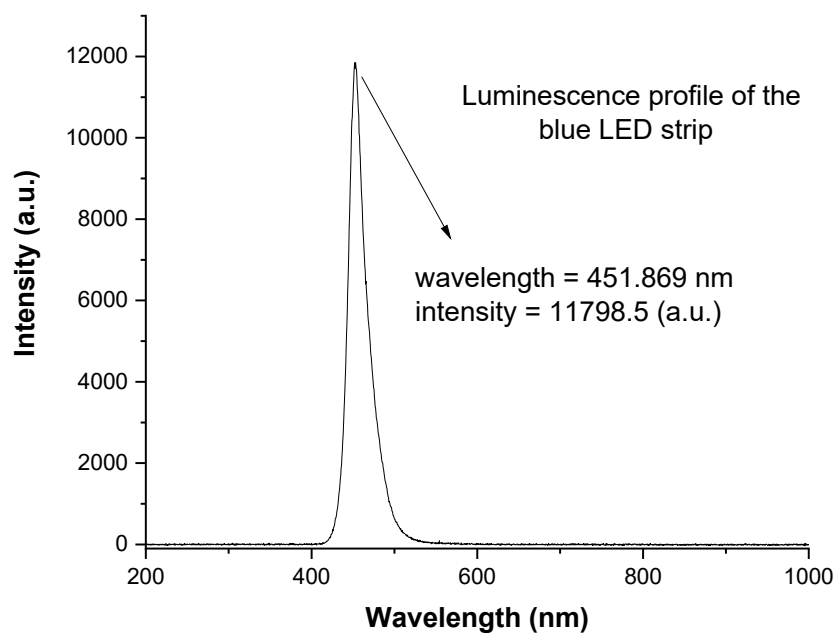

**Fig 1: Plot of Intensity versus wavelength for the emission from the blue LED strip**

An Ocean Optics spectrometer was used to record the emission spectrum of the blue LED strip, which was oriented toward the aperture of the spectrometer unit at a distance of approximately 8 cm.

## Optimization and Control Studies

### (a) Optimization of reaction conditions for the synthesis of phenanthridines:

In an 8 mL screw cap reaction vial equipped with a magnetic stirrer bar was added 2-isocyano-5-methyl-1,1'-biphenyl (0.2 mmol, 1 equiv.), triethyl methanetricarboxylate, appropriate oxidant, and appropriate photocatalyst. The appropriate solvent was added to the vial, and it was purged three times with argon and sealed with a cap containing a TFE-lined silicone septa. The reaction vial was degassed with argon for 15 minutes via an inlet needle. After this, the cap was changed with a solid-top cap under argon flow, and the vial was irradiated with 2 × 27 W CFL for 6-24 h. The reaction temperature was maintained at approximately 25 °C *via* a fan. After the reaction was stopped, the reaction mixture was transferred to a separatory funnel and diluted with EtOAc (10 mL) and water (10 mL). Sat. NaHCO<sub>3</sub> was then added and extracted with EtOAc (10 mL x 3) and washed with brine (saturated aq NaCl, 10 mL). The combined organic layer was dried over Na<sub>2</sub>SO<sub>4</sub>, and the solvent was removed in a rotatory evaporator followed by *a vacuo*. The reaction mixture was analyzed by <sup>1</sup>H NMR using 1,3,5-trimethoxybenzene as an internal standard.

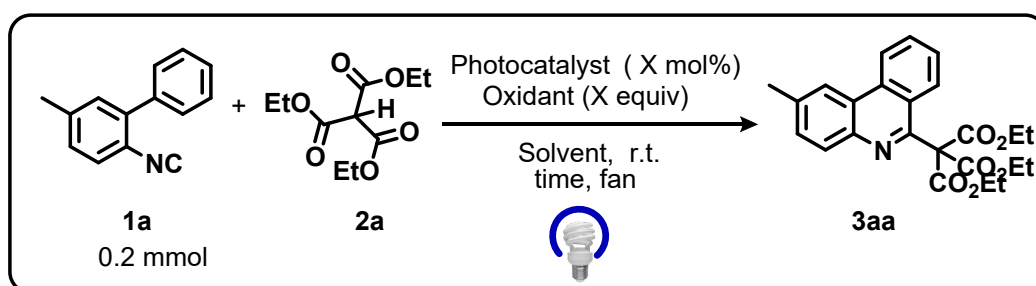

**Table 1** Optimization studies <sup>a</sup>

| Entry | 2a (equiv) | Oxidant (equiv)                                  | Atmosphere | Time (h) | Photocatalyst (mol%)                                         | Solvent                                                           | NMR Yield of 3aa (%) <sup>b</sup> |
|-------|------------|--------------------------------------------------|------------|----------|--------------------------------------------------------------|-------------------------------------------------------------------|-----------------------------------|
| 1     | 2          | K <sub>2</sub> S <sub>2</sub> O <sub>8</sub> (2) | air        | 12       | Ru(bpy) <sub>3</sub> Cl <sub>2</sub> ·6 H <sub>2</sub> O (2) | CH <sub>3</sub> CN:H <sub>2</sub> O (1:1)<br>2 mL                 | 62                                |
| 2     | 2          | K <sub>2</sub> S <sub>2</sub> O <sub>8</sub> (2) | air        | 12       | Ru(bpy) <sub>3</sub> Cl <sub>2</sub> ·6 H <sub>2</sub> O (2) | CH <sub>3</sub> CN                                                | n.d.                              |
| 3     | 2          | K <sub>2</sub> S <sub>2</sub> O <sub>8</sub> (2) | air        | 12       | Ru(bpy) <sub>3</sub> Cl <sub>2</sub> ·6 H <sub>2</sub> O (2) | CH <sub>3</sub> CH <sub>2</sub> CN:H <sub>2</sub> O (1:1)<br>2 mL | 6                                 |
| 4     | 2          | K <sub>2</sub> S <sub>2</sub> O <sub>8</sub> (2) | air        | 12       | Ru(bpy) <sub>3</sub> Cl <sub>2</sub> ·6 H <sub>2</sub> O (2) | C <sub>3</sub> H <sub>7</sub> CN:H <sub>2</sub> O (1:1)<br>2 mL   | n.d.                              |

|    |   |                                                                      |     |    |                                                                             |                                                      |       |
|----|---|----------------------------------------------------------------------|-----|----|-----------------------------------------------------------------------------|------------------------------------------------------|-------|
| 5  | 2 | K <sub>2</sub> S <sub>2</sub> O <sub>8</sub><br>(2)                  | air | 12 | Ru(bpy) <sub>3</sub> Cl <sub>2</sub> . 6<br>H <sub>2</sub> O (2)            | DCM:H <sub>2</sub> O (1:1)<br>2 mL                   | trace |
| 6  | 2 | K <sub>2</sub> S <sub>2</sub> O <sub>8</sub><br>(2)                  | air | 12 | Ru(bpy) <sub>3</sub> Cl <sub>2</sub> . 6<br>H <sub>2</sub> O (2)            | DMSO:H <sub>2</sub> O<br>(1:1)<br>2 mL               | trace |
| 7  | 2 | K <sub>2</sub> S <sub>2</sub> O <sub>8</sub><br>(2)                  | air | 12 | Ru(bpy) <sub>3</sub> Cl <sub>2</sub> . 6<br>H <sub>2</sub> O (2)            | TFE:H <sub>2</sub> O (1:1)<br>2 mL                   | n.d.  |
| 8  | 2 | K <sub>2</sub> S <sub>2</sub> O <sub>8</sub><br>(2)                  | air | 12 | Ru(bpy) <sub>3</sub> Cl <sub>2</sub> . 6<br>H <sub>2</sub> O (2)            | HFIP:H <sub>2</sub> O (1:1)<br>2 mL                  | n.d.  |
| 9  | 2 | K <sub>2</sub> S <sub>2</sub> O <sub>8</sub><br>(2)                  | air | 12 | Eosin Y (5)                                                                 | CH <sub>3</sub> CN:H <sub>2</sub> O<br>(1:1)<br>2 mL | n.d.  |
| 10 | 2 | K <sub>2</sub> S <sub>2</sub> O <sub>8</sub><br>(2)                  | air | 12 | Ir[{dF(CF <sub>3</sub> )ppy}<br><sub>2</sub> (dtbpy)]PF <sub>6</sub><br>(2) | CH <sub>3</sub> CN:H <sub>2</sub> O<br>(1:1)<br>2 mL | n.d.  |
| 11 | 2 | K <sub>2</sub> S <sub>2</sub> O <sub>8</sub><br>(2)                  | air | 12 | Mes-Acr-PhBF <sub>4</sub><br>(5)                                            | CH <sub>3</sub> CN:H <sub>2</sub> O<br>(1:1)<br>2 mL | n.d.  |
| 12 | 2 | Na <sub>2</sub> S <sub>2</sub> O <sub>8</sub><br>(2)                 | air | 12 | Ru(bpy) <sub>3</sub> Cl <sub>2</sub> . 6<br>H <sub>2</sub> O (2)            | CH <sub>3</sub> CN:H <sub>2</sub> O<br>(1:1)<br>2 mL | 59    |
| 13 | 2 | (NH <sub>4</sub> ) <sub>2</sub> S <sub>2</sub><br>O <sub>8</sub> (2) | air | 12 | Ru(bpy) <sub>3</sub> Cl <sub>2</sub> . 6<br>H <sub>2</sub> O (2)            | CH <sub>3</sub> CN:H <sub>2</sub> O<br>(1:1)<br>2 mL | 53    |
| 14 | 2 | 70% aq.<br>TBHP(2)                                                   | air | 12 | Ru(bpy) <sub>3</sub> Cl <sub>2</sub> . 6<br>H <sub>2</sub> O (2)            | CH <sub>3</sub> CN:H <sub>2</sub> O<br>(1:1)<br>2 mL | n.d.  |
| 15 | 2 | K <sub>2</sub> S <sub>2</sub> O <sub>8</sub><br>(2)                  | air | 12 | Ru(bpy) <sub>3</sub> Cl <sub>2</sub> . 6<br>H <sub>2</sub> O (2)            | CH <sub>3</sub> CN:H <sub>2</sub> O<br>(1:1)<br>1 mL | 46    |
| 16 | 2 | K <sub>2</sub> S <sub>2</sub> O <sub>8</sub><br>(2)                  | air | 12 | Ru(bpy) <sub>3</sub> Cl <sub>2</sub> . 6<br>H <sub>2</sub> O (2)            | CH <sub>3</sub> CN:H <sub>2</sub> O<br>(1:1)<br>4 mL | 38    |
| 17 | 2 | K <sub>2</sub> S <sub>2</sub> O <sub>8</sub><br>(2)                  | air | 12 | Ru(bpy) <sub>3</sub> Cl <sub>2</sub> . 6<br>H <sub>2</sub> O (2)            | CH <sub>3</sub> CN:H <sub>2</sub> O<br>(3:1)         | 59    |

|                    |     |                                                       |                                   |    |                                                                 |                                                          |    |
|--------------------|-----|-------------------------------------------------------|-----------------------------------|----|-----------------------------------------------------------------|----------------------------------------------------------|----|
|                    |     |                                                       |                                   |    |                                                                 | 2 mL                                                     |    |
| 18                 | 2   | K <sub>2</sub> S <sub>2</sub> O <sub>8</sub><br>(2)   | air                               | 12 | Ru(bpy) <sub>3</sub> Cl <sub>2</sub> ·6<br>H <sub>2</sub> O (2) | CH <sub>3</sub> CN:H <sub>2</sub> O<br>(1:3)<br><br>2 mL | 52 |
| 19                 | 2   | K <sub>2</sub> S <sub>2</sub> O <sub>8</sub><br>(2)   | air                               | 24 | Ru(bpy) <sub>3</sub> Cl <sub>2</sub> ·6<br>H <sub>2</sub> O (2) | CH <sub>3</sub> CN:H <sub>2</sub> O<br>(1:1)<br><br>2 mL | 60 |
| 20                 | 2   | K <sub>2</sub> S <sub>2</sub> O <sub>8</sub><br>(2)   | air                               | 6  | Ru(bpy) <sub>3</sub> Cl <sub>2</sub> ·6<br>H <sub>2</sub> O (2) | CH <sub>3</sub> CN:H <sub>2</sub> O<br>(1:1)<br><br>2 mL | 56 |
| 21                 | 2   | K <sub>2</sub> S <sub>2</sub> O <sub>8</sub><br>(2)   | air                               | 12 | Ru(bpy) <sub>3</sub> (PF <sub>6</sub> ) <sub>2</sub><br>(2)     | CH <sub>3</sub> CN:H <sub>2</sub> O<br>(1:1)<br><br>2 mL | 65 |
| 22                 | 2   | K <sub>2</sub> S <sub>2</sub> O <sub>8</sub><br>(2)   | air                               | 12 | Ru(bpy) <sub>3</sub> (PF <sub>6</sub> ) <sub>2</sub><br>(1)     | CH <sub>3</sub> CN:H <sub>2</sub> O<br>(1:1)<br><br>2 mL | 61 |
| 23                 | 2   | K <sub>2</sub> S <sub>2</sub> O <sub>8</sub><br>(2)   | air                               | 12 | Ru(bpy) <sub>3</sub> (PF <sub>6</sub> ) <sub>2</sub><br>(3)     | CH <sub>3</sub> CN:H <sub>2</sub> O<br>(1:1)<br><br>2 mL | 57 |
| 24 <sup>c</sup>    | 2   | K <sub>2</sub> S <sub>2</sub> O <sub>8</sub><br>(2)   | air                               | 12 | Ru(bpy) <sub>3</sub> (PF <sub>6</sub> ) <sub>2</sub><br>(2)     | CH <sub>3</sub> CN:H <sub>2</sub> O<br>(1:1)<br><br>2 mL | 71 |
| 25 <sup>c, d</sup> | 2   | K <sub>2</sub> S <sub>2</sub> O <sub>8</sub><br>(2)   | purged and<br>degassed<br>with Ar | 12 | Ru(bpy) <sub>3</sub> (PF <sub>6</sub> ) <sub>2</sub><br>(2)     | CH <sub>3</sub> CN:H <sub>2</sub> O<br>(1:1)<br><br>2 mL | 78 |
| 26 <sup>c, d</sup> | 2   | K <sub>2</sub> S <sub>2</sub> O <sub>8</sub><br>(1.5) | purged and<br>degassed<br>with Ar | 12 | Ru(bpy) <sub>3</sub> (PF <sub>6</sub> ) <sub>2</sub><br>(2)     | CH <sub>3</sub> CN:H <sub>2</sub> O<br>(1:1)<br><br>2 mL | 76 |
| 27 <sup>c, d</sup> | 2   | K <sub>2</sub> S <sub>2</sub> O <sub>8</sub><br>(1.2) | purged and<br>degassed<br>with Ar | 12 | Ru(bpy) <sub>3</sub> (PF <sub>6</sub> ) <sub>2</sub><br>(2)     | CH <sub>3</sub> CN:H <sub>2</sub> O<br>(1:1)<br><br>2 mL | 71 |
| 28 <sup>c, d</sup> | 2   | K <sub>2</sub> S <sub>2</sub> O <sub>8</sub><br>(2.5) | purged and<br>degassed<br>with Ar | 12 | Ru(bpy) <sub>3</sub> (PF <sub>6</sub> ) <sub>2</sub><br>(2)     | CH <sub>3</sub> CN:H <sub>2</sub> O<br>(1:1)<br><br>2 mL | 75 |
| 29 <sup>c, d</sup> | 1.5 | K <sub>2</sub> S <sub>2</sub> O <sub>8</sub><br>(1.5) | purged and<br>degassed            | 12 | Ru(bpy) <sub>3</sub> (PF <sub>6</sub> ) <sub>2</sub><br>(2)     | CH <sub>3</sub> CN:H <sub>2</sub> O<br>(1:1)             | 79 |

|                    |     |                                                       |                                   |    |                                                                  |                                                          |      |
|--------------------|-----|-------------------------------------------------------|-----------------------------------|----|------------------------------------------------------------------|----------------------------------------------------------|------|
|                    |     |                                                       | with Ar                           |    |                                                                  | 2 mL                                                     |      |
| 30 <sup>c, d</sup> | 1.2 | K <sub>2</sub> S <sub>2</sub> O <sub>8</sub><br>(1.5) | purged and<br>degassed<br>with Ar | 12 | Ru(bpy) <sub>3</sub> (PF <sub>6</sub> ) <sub>2</sub><br>(2)      | CH <sub>3</sub> CN:H <sub>2</sub> O<br>(1:1)<br><br>2 mL | 57   |
| 31                 | 2   | K <sub>2</sub> S <sub>2</sub> O <sub>8</sub><br>(2)   | air                               | 12 | none                                                             | CH <sub>3</sub> CN:H <sub>2</sub> O<br>(1:1)<br><br>2 mL | n.d. |
| 32                 | 2   | none                                                  | air                               | 12 | Ru(bpy) <sub>3</sub> Cl <sub>2</sub> · 6<br>H <sub>2</sub> O (2) | CH <sub>3</sub> CN:H <sub>2</sub> O<br>(1:1)<br><br>2 mL | n.d. |
| 33 <sup>e</sup>    | 2   | K <sub>2</sub> S <sub>2</sub> O <sub>8</sub><br>(2)   | air                               | 12 | Ru(bpy) <sub>3</sub> Cl <sub>2</sub> · 6<br>H <sub>2</sub> O (2) | CH <sub>3</sub> CN:H <sub>2</sub> O<br>(1:1)<br><br>2 mL | n.d. |

<sup>a</sup> Reaction conditions: **1a** (0.2 mmol), **2a** (X mmol), oxidant (X mmol), Photocatalyst (x mol%), Solvent (x mL) under 2 × 27W CFL for 6-12 h. <sup>b</sup> NMR yield (using 1,3,5-trimethoxybenzene as an internal standard). <sup>c</sup> Reaction was performed under blue LED strip (452 nm, 1.5 mW/cm<sup>2</sup>). <sup>d</sup> Reaction mixture was degassed with Ar for 15 min. <sup>e</sup> Reaction was performed in the dark.

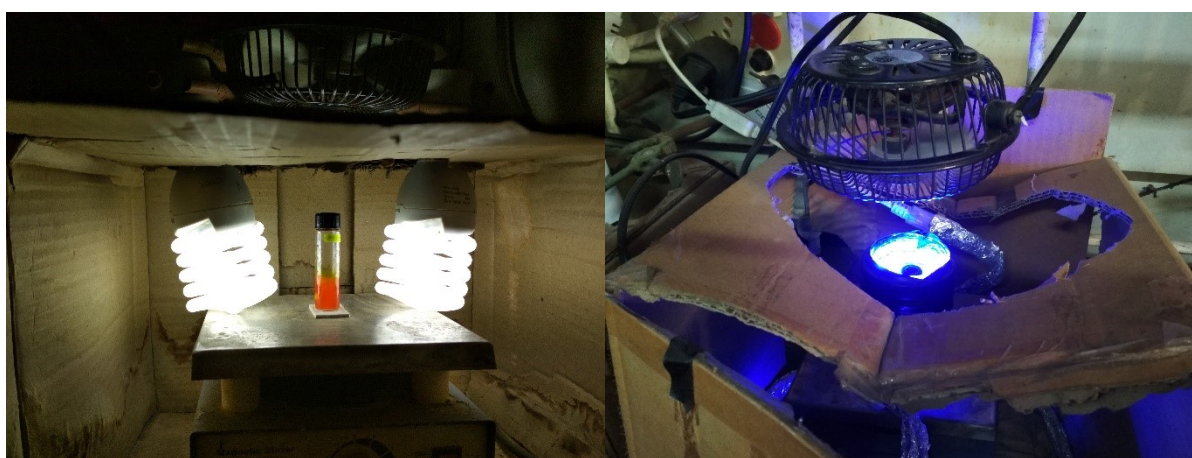

**Fig 2: Reaction set-up under CFL (left) and Blue LED strips (right)**

## General Experimental Procedure

### (a) General experimental procedure for synthesis of phenanthridines from *ortho*-aryl isocyanides and tricarbonyls:

In a 8 mL screw cap reaction vial equipped with a magnetic stirrer bar was added *ortho*-aryl isocyanide (0.2 mmol, 1 equiv.), tricarbonyl (0.3 mmol, 1.5 equiv.),  $K_2S_2O_8$  (0.3 mmol, 1.5 equiv.),  $Ru(bpy)_3(PF_6)_2$  (0.004 mmol, 2 mol%). 2 mL of degassed  $CH_3CN:H_2O$  (1:1) was added to the vial and it was purged three times with argon and was sealed with a cap containing TFE-lined silicone septa. The reaction vial was then degassed with argon for 15 min *via* an inlet needle. After this, the cap was changed with a solid-top cap under argon flow and the vial was irradiated with a blue LED strip (0.11 W/cm<sup>2</sup>, measured through a Newport optical power meter 1916-R at a distance of 2 cm) for 12-24 h. The temperature of the reaction vial was maintained at approximately 25 °C *via* a fan. After the reaction was stopped, the reaction mixture was transferred to a separatory funnel and diluted with EtOAc (10 mL) and water (10 mL). Sat.  $NaHCO_3$  was then added to the reaction mixture and it was extracted with EtOAc (10 mL x 3) and washed with brine (saturated aq NaCl, 10 mL). The combined organic layer was dried over  $Na_2SO_4$ , and the solvent was removed in a rotatory evaporator followed by *vacuo*. The crude products were then purified on a silica gel column (230-400 mesh) using EtOAc/petroleum ether mixture to get the pure product.

### (b) Experimental procedure for synthesis of isoquinolines from vinyl isocyanides and tricarbonyls:

In an 8 mL screw cap reaction vial equipped with a magnetic stirrer bar was added vinyl-isocyanide (0.2 mmol, 1 equiv.), tricarbonyl (0.3 mmol, 1.5 equiv.),  $K_2S_2O_8$  (0.3 mmol, 1.5 equiv.),  $Ru(bpy)_3(PF_6)_2$  (0.004 mmol, 2 mol%). 2 mL of degassed  $CH_3CN:H_2O$  (1:1) was added to the vial, and it was purged three times with argon and was sealed with a cap containing TFE-lined silicone septa. The reaction vial was degassed with argon for 15 minutes *via* an inlet needle. After this, the cap was changed with a solid-top cap under argon flow and the vial was irradiated with a blue LED strip (0.11 W/cm<sup>2</sup>, measured through a Newport optical power meter 1916-R at a distance of 2 cm) for 12-24 h. The temperature of the reaction vial was maintained at approximately 25 °C *via* a fan. After the reaction was stopped, the reaction mixture was transferred to a separatory funnel and diluted with EtOAc (10 mL) and water (10 mL). Sat.  $NaHCO_3$  was then added to the reaction mixture and it was extracted with EtOAc (10 mL x 3) and washed with brine (saturated aq NaCl, 10 mL). The combined organic layer was dried over  $Na_2SO_4$ , and the solvent was removed in a rotatory evaporator followed by *a vacuum*. The crude products were then purified on a silica gel column (230-400 mesh) using EtOAc/petroleum ether mixture to get the pure product.

### (c) Experimental Procedure for the scale-up reaction for phenanthridine from *ortho*-aryl isocyanide and triethylmethane tricarbonylate:

In a 50 mL RB (round bottom flask), equipped with a magnetic stirrer bar was added the 2-isocyano-5-methyl-1,1'-biphenyl (5.175 mmol, 1 equiv.), tricarbonyl (7.7625 mmol, 1.5 equiv.),  $K_2S_2O_8$  (7.7625 mmol, 1.5 equiv.),  $Ru(bpy)_3(PF_6)_2$  (0.1035 mmol, 2 mol%). 52 mL of



degassed CH<sub>3</sub>CN:H<sub>2</sub>O (1:1) was added to the RB, and it was purged three times with argon and was sealed with a rubber septum. The rb was then degassed with argon for 15 min via an inlet needle. After this, the rb was irradiated with a blue LED strip (0.11 W/cm<sup>2</sup>, measured through an optical power meter 1916-R at a distance of 1 cm) for 12 h. The temperature of the RB was maintained at approximately 25 °C *via* a fan. After the reaction was stopped, the reaction mixture was transferred to a separatory funnel and diluted with EtOAc (20 mL) and water (20 mL). Sat. NaHCO<sub>3</sub> was then added to the reaction mixture, and it was extracted with EtOAc (20 mL x 3) and washed with brine (saturated aq NaCl, 20 mL). The combined organic layer was dried over Na<sub>2</sub>SO<sub>4</sub> and the solvent was removed in a rotatory evaporator followed by a *vacuo*. The crude products were then purified on a silica gel column (230-400 mesh) using EtOAc/petroleum ether mixture to get the pure product **3aa** in 61% yield (1.34 gm).

#### Characterization data for products:

1. **triethyl (2-methylphenanthridin-6-yl)methanetricarboxylate (3aa)**. White solid; Yield – (56.7 mg, 67%); *mp*: 145-147 °C; Prepared as shown in the general experimental procedure (a). **IR** (Neat, cm<sup>-1</sup>): 2982, 2925, 1739, 1219, 1060; **<sup>1</sup>H NMR** (400 MHz, CDCl<sub>3</sub>) δ 8.65 (d, *J* = 8.3 Hz, 1 H), 8.35 (s, 1 H), 7.98 (d, *J* = 8.3 Hz, 1 H), 7.81-7.73 (m, 2 H), 7.60-7.53 (m, 2 H), 4.37 (q, *J* = 7.1 Hz, 6 H), 2.64 (s, 3 H), 1.25 (t, *J* = 7.1 Hz, 9 H); **<sup>13</sup>C NMR** (100 MHz, CDCl<sub>3</sub>) δ 165.6, 153.5, 140.8, 137.5, 132.9, 130.2, 130.1, 129.8, 126.6, 126.2, 125.2, 124.0, 122.4, 121.4, 74.7, 62.6, 22.0, 13.8; **HRESI-MS** (*m/z*): Calculated for C<sub>24</sub>H<sub>25</sub>NO<sub>6</sub>H (M + H): 424.1760, found (M + H): 424.1759.

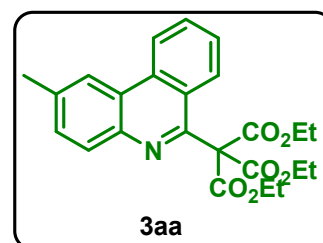

2. **triethyl phenanthridin-6-ylmethanetricarboxylate (3ba)**. White solid; Yield – (52.1 mg, 64%); *mp*: 109-111 °C; Prepared as shown in the general experimental procedure (a). **IR** (Neat, cm<sup>-1</sup>): 2981, 1731, 1221, 1058; **<sup>1</sup>H NMR** (400 MHz, CDCl<sub>3</sub>) δ 8.67 (d, *J* = 8.3 Hz, 1 H), 8.59-8.57 (m, 1 H), 8.11-8.09 (m, 1 H), 7.84-7.77 (m, 2 H), 7.75-7.68 (m, 2 H), 7.63-7.59 (m, 1 H), 4.38 (q, *J* = 7.1 Hz, 6 H), 1.26 (t, *J* = 7.1 Hz, 9 H); **<sup>13</sup>C NMR** (100 MHz, CDCl<sub>3</sub>) δ 165.6, 154.5, 142.5, 133.2, 130.5, 130.1, 128.4, 127.6, 126.7, 126.2, 125.2, 124.1, 122.4, 121.8, 74.7, 62.7, 13.8; **HRESI-MS** (*m/z*): Calculated for C<sub>23</sub>H<sub>23</sub>NO<sub>6</sub>H (M + H): 410.1604, found (M + H): 410.1610.

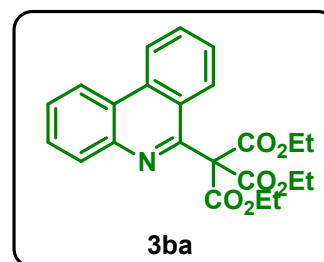

3. **triethyl (2-cyanophenanthridin-6-yl)methanetricarboxylate (3ca)**. White solid; Yield – (71.6 mg, 82%); *mp*: 164-166 °C; Prepared as shown in the general experimental procedure (a). **IR** (Neat, cm<sup>-1</sup>): 2983, 2228, 1736, 1218, 1059; **<sup>1</sup>H NMR** (400 MHz, CDCl<sub>3</sub>) δ 8.91 (d, *J* = 1.28 Hz, 1 H), 8.61 (d, *J* = 8.3 Hz, 1 H), 8.15 (d, *J* = 8.4 Hz, 1 H), 7.91-7.88 (m, 2 H), 7.81 (d, *J* = 8.2 Hz, 1 H), 7.71-7.67 (m, 1 H), 4.38 (q, *J* = 7.1 Hz, 6 H), 1.26 (t, *J* = 7.1 Hz, 9 H); **<sup>13</sup>C NMR** (100 MHz, CDCl<sub>3</sub>) δ 165.1, 157.7, 144.0, 132.1, 131.5, 131.2, 130.1, 128.0, 127.7, 126.6, 125.5, 124.3, 122.4, 118.9, 111.0, 74.7, 62.9, 13.8; **HRESI-MS** (*m/z*): Calculated for C<sub>24</sub>H<sub>22</sub>N<sub>2</sub>O<sub>6</sub>H (M + H): 435.1556, found (M + H): 435.1552.

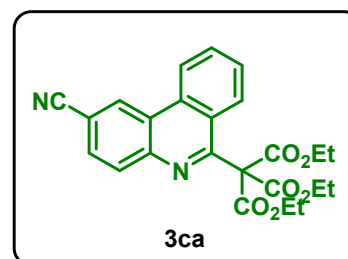

4. **triethyl (2-phenylphenanthridin-6-yl)methanetricarboxylate (3da)**. White solid; Yield – (65.7 mg, 67%); **mp**: 168-170 °C; Prepared as shown in the general experimental procedure (a). **IR** (Neat,  $\text{cm}^{-1}$ ): 2981, 2934, 1738, 1224, 1060;  **$^1\text{H NMR}$**  (400 MHz,  $\text{CDCl}_3$ )  $\delta$  8.77-8.74 (m, 2 H), 8.16 (d,  $J = 8.4$  Hz, 1 H), 7.97 (dd,  $J_1 = 8.4$  Hz,  $J_2 = 1.8$  Hz, 1 H), 7.84-7.79 (m, 4 H), 7.63 (t,  $J = 7.4$  Hz, 1 H), 7.55 (t,  $J = 7.4$  Hz, 2 H), 7.45 (t,  $J = 7.4$  Hz, 1 H), 4.41 (q,  $J = 7.2$  Hz, 6 H), 1.29 (t,  $J = 7.1$  Hz, 9 H);  **$^{13}\text{C NMR}$**  (100 MHz,  $\text{CDCl}_3$ )  $\delta$  165.6, 154.4, 141.8, 141.0, 140.5, 133.2, 130.9, 130.1, 128.9, 127.9, 127.7, 127.6, 126.9, 126.3, 125.4, 124.3, 122.4, 120.2, 74.7, 62.7, 13.8; **HRESI-MS** ( $m/z$ ): Calculated for  $\text{C}_{29}\text{H}_{27}\text{NO}_6\text{H}$  ( $M + H$ ): 486.1917, found ( $M + H$ ): 486.1920.

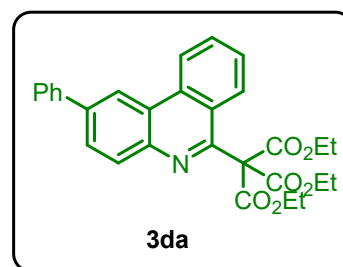

5. **triethyl (2-nitrophenanthridin-6-yl)methanetricarboxylate (3ea)**. White solid; Yield – (41.8 mg, 46%); **mp**: 166-168 °C; Prepared as shown in the general experimental procedure (a). **IR** (Neat,  $\text{cm}^{-1}$ ): 2983, 1732, 1217, 1059;  **$^1\text{H NMR}$**  (400 MHz,  $\text{CDCl}_3$ )  $\delta$  9.49(d,  $J = 2.4$  Hz, 1 H), 8.74 (d,  $J = 8.3$  Hz, 1 H), 8.51 (dd,  $J_1 = 8.9$  Hz,  $J_2 = 2.4$  Hz, 1 H), 8.20 (d,  $J = 8.9$  Hz, 1 H), 7.97-7.92 (m, 1 H), 7.85-7.83 (m, 1 H), 7.75-7.71 (m, 1 H), 4.39 (q,  $J = 7.1$  Hz, 6 H), 1.27 (t,  $J = 7.1$  Hz, 9 H);  **$^{13}\text{C NMR}$**  (100 MHz,  $\text{CDCl}_3$ )  $\delta$  165.1, 158.4, 146.3, 145.3, 133.0, 131.8, 131.4, 128.3, 126.8, 125.6, 124.2, 122.7, 122.4, 118.7, 74.82, 63.0, 13.8; **HRESI-MS** ( $m/z$ ): Calculated for  $\text{C}_{23}\text{H}_{22}\text{N}_2\text{O}_8\text{H}$  ( $M + H$ ): 455.1454, found ( $M + H$ ): 455.1452.

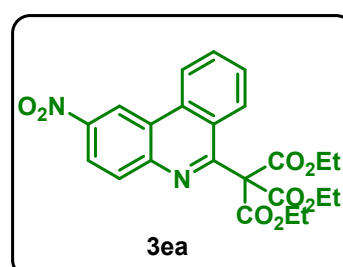

6. **triethyl (8-methylphenanthridin-6-yl)methanetricarboxylate (3fa)**. White solid; Yield – (57.1 mg, 68%); **mp**: 162-164 °C; Prepared as shown in the general experimental procedure (a). **IR** (Neat,  $\text{cm}^{-1}$ ): 2981, , 1737, 1206, 1059;  **$^1\text{H NMR}$**  (400 MHz,  $\text{CDCl}_3$ )  $\delta$  8.56-8.54 (m, 2 H), 8.08-8.05 (m, 1 H), 7.69-7.63(m, 3 H), 7.51 (s, 1 H), 4.38 (q,  $J = 7.1$  Hz, 6 H), 2.53 (s, 3 H), 1.26 (t,  $J = 7.1$  Hz, 9 H);  **$^{13}\text{C NMR}$**  (100 MHz,  $\text{CDCl}_3$ )  $\delta$  165.6, 154.2, 142.2, 136.7, 131.9, 131.2, 130.5, 128.0, 127.5, 125.6, 125.4, 124.3, 122.4, 121.6, 74.8, 62.7, 21.8, 13.8; **HRESI-MS** ( $m/z$ ): Calculated for  $\text{C}_{24}\text{H}_{25}\text{NO}_6\text{H}$  ( $M + H$ ): 424.1760, found ( $M + H$ ): 424.1760.

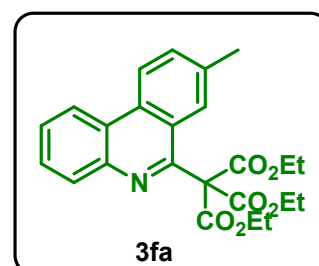

7. **triethyl (8-methoxyphenanthridin-6-yl)methanetricarboxylate (3ga)**. White solid; Yield – (62.6 mg, 71%); **mp**: 121-123 °C; Prepared as shown in the general experimental procedure (a). **IR** (Neat,  $\text{cm}^{-1}$ ): 2981, 1736, 1220, 1058;  **$^1\text{H NMR}$**  (400 MHz,  $\text{CDCl}_3$ )  $\delta$  8.57 (d,  $J = 9.1$  Hz, 1 H), 8.50-8.48 (m, 1 H), 8.08-8.05 (m, 1 H), 7.68-7.66 (m, 2 H), 7.45 (dd,  $J_1 = 9.0$  Hz,  $J_2 = 2.4$  Hz 1 H), 7.10 (s, 1 H), 4.38 (q,  $J = 7.1$  Hz, 6 H), 3.87 (s, 3 H), 1.27 (t,  $J = 7.0$  Hz, 9 H);  **$^{13}\text{C NMR}$**  (100 MHz,  $\text{CDCl}_3$ )  $\delta$  165.6, 158.1, 153.6, 141.7, 130.4, 127.6, 127.4, 126.4, 124.2, 124.0, 121.3, 121.0, 106.3, 74.9, 62.6, 55.3, 13.9; **HRESI-MS** ( $m/z$ ): Calculated for  $\text{C}_{24}\text{H}_{25}\text{NO}_7\text{H}$  ( $M + H$ ): 440.1709, found ( $M + H$ ): 440.1711.

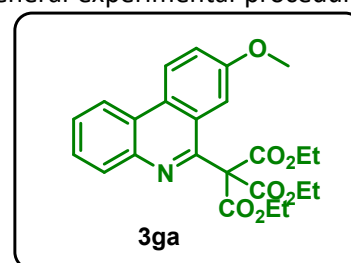

8. **triethyl (8-chlorophenanthridin-6-yl)methanetricarboxylate (3ha)**. White solid; Yield – (61.7 mg, 70%); **mp**: 143-145 °C; Prepared as shown in the general experimental procedure (a). **IR** (Neat,  $\text{cm}^{-1}$ ): 2981, 1736, 1207, 1058;  **$^1\text{H NMR}$**  (400 MHz,  $\text{CDCl}_3$ )  $\delta$  8.57 (d,  $J = 9.0$  Hz, 1 H), 8.49

(d,  $J = 7.4$  Hz, 1 H), 8.08 (d,  $J = 7.9$  Hz, 1 H), 7.75-7.67 (m, 4 H), 4.41 (q,  $J = 7.1$  Hz, 6 H), 1.30 (t,  $J = 7.1$  Hz, 9 H);  $^{13}\text{C NMR}$  (100 MHz,  $\text{CDCl}_3$ )  $\delta$  165.2, 153.3, 142.3, 132.7, 131.6, 130.6, 130.5, 128.7, 128.0, 126.1, 125.7, 124.1, 123.5, 121.6, 74.7, 62.8, 13.8; **HRESI-MS** ( $m/z$ ): Calculated for  $\text{C}_{23}\text{H}_{22}\text{ClNO}_6\text{H}$  (M + H): 444.1214, found (M + H): 444.1211.

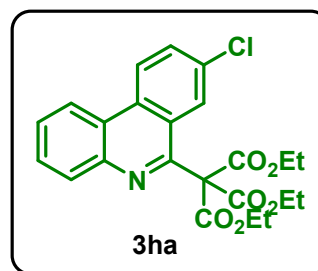

9. **triethyl (8-bromophenanthridin-6-yl)methanetricarboxylate (3ia)**. White solid; Yield – (76.8 mg, 79%); **mp**: 149-151 °C; Prepared as shown in the general experimental procedure (a). **IR** (Neat,  $\text{cm}^{-1}$ ): 2982, 1736, 1208, 1059;  $^1\text{H NMR}$  (400 MHz,  $\text{CDCl}_3$ )  $\delta$  8.49 (d,  $J = 8.4$  Hz, 2 H), 8.07 (d,  $J = 7.92$  Hz, 1 H), 7.89-7.86 (m, 2 H), 7.75-7.67 (m, 2 H), 4.41 (q,  $J = 7.1$  Hz, 6 H), 1.31 (t,  $J = 7.0$  Hz, 9 H);  $^{13}\text{C NMR}$  (100 MHz,  $\text{CDCl}_3$ )  $\delta$  165.2, 153.2, 142.3, 133.3, 131.9, 130.5, 128.9, 128.8, 128.0, 126.4, 124.2, 123.5, 121.6, 120.8, 74.7, 62.8, 13.8; **HRESI-MS** ( $m/z$ ): Calculated for  $\text{C}_{23}\text{H}_{22}\text{BrNO}_6\text{H}$  (M + H): 488.0709, found (M + H): 488.0702.

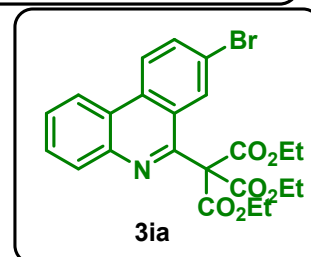

10. **triethyl (8-fluorophenanthridin-6-yl)methanetricarboxylate (3ja)**. White solid; Yield – (49.2 mg, 57%); **mp**: 105-107 °C; Prepared as shown in the general experimental procedure (a). **IR** (Neat,  $\text{cm}^{-1}$ ): 2982, 2937, 1734, 1194, 1058;  $^1\text{H NMR}$  (400 MHz,  $\text{CDCl}_3$ )  $\delta$  8.67-8.63 (m, 1 H), 8.52-8.50 (m, 1 H), 8.10-8.08 (m, 1 H), 7.74-7.68 (m, 2 H), 7.59-7.55 (m, 1 H), 7.43-7.40 (m, 1 H), 4.40 (q,  $J = 7.1$  Hz, 6 H), 1.29 (t,  $J = 7.1$  Hz, 9 H);  $^{13}\text{C NMR}$  (100 MHz,  $\text{CDCl}_3$ )  $\delta$  165.3, 160.7 (d,  $J_{\text{C-F}} = 246.9$  Hz), 153.6 (d,  $J_{\text{C-F}} = 3.8$  Hz), 142.1, 130.5, 129.9, 128.3, 128.0, 126.4 (d,  $J_{\text{C-F}} = 7.9$  Hz), 125.0 (d,  $J_{\text{C-F}} = 8.4$  Hz), 123.7, 121.5, 119.5 (d,  $J_{\text{C-F}} = 23.6$  Hz), 111.0 (d,  $J_{\text{C-F}} = 22.1$  Hz), 74.7, 62.8, 13.8; **HRESI-MS** ( $m/z$ ): Calculated for  $\text{C}_{23}\text{H}_{22}\text{FNO}_6\text{H}$  (M + H): 428.1059, found (M + H): 428.1509.

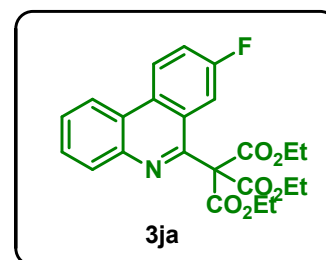

11. **triethyl (8-(trifluoromethyl)phenanthridin-6-yl)methanetricarboxylate (3ka)**. White solid; Yield – (74.3 mg, 78%); **mp**: 144-146 °C; Prepared as shown in the general experimental procedure (a). **IR** (Neat,  $\text{cm}^{-1}$ ): 2983, 1733, 1208, 1124, 1058;  $^1\text{H NMR}$  (400 MHz,  $\text{CDCl}_3$ )  $\delta$  8.76 (d,  $J = 8.7$  Hz, 1 H), 8.57 (d,  $J = 8.0$  Hz, 1 H), 8.11 (d,  $J = 8.0$  Hz, 1 H), 8.05 (s, 1 H), 8.0 (d,  $J = 8.7$  Hz, 1 H), 7.81-7.72 (m, 2 H), 4.41 (q,  $J = 7.1$  Hz, 6 H), 1.30 (t,  $J = 7.1$  Hz, 9 H);  $^{13}\text{C NMR}$  (100 MHz,  $\text{CDCl}_3$ )  $\delta$  165.3, 154.4, 143.1, 135.5, 130.7, 129.8, 128.5 (q,  $J = 35.2$  Hz), 128.3, 125.9 (q,  $J = 3.7$  Hz), 124.7, 124.2 (q,  $J = 4.3$  Hz), 123.8 (q,  $J = 270.8$  Hz), 123.6, 123.3, 122.3, 74.9, 63.0, 13.8; **HRESI-MS** ( $m/z$ ): Calculated for  $\text{C}_{24}\text{H}_{22}\text{F}_3\text{NO}_6\text{H}$  (M + H): 478.1477, found (M + H): 478.1478.

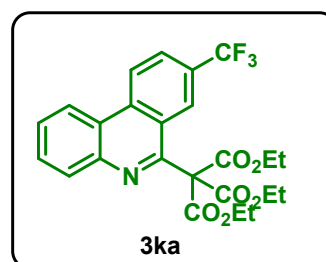

12. **triethyl (8-cyanophenanthridin-6-yl)methanetricarboxylate (3la)**. White solid; Yield – (50.1 mg, 58%); **mp**: 155-157 °C; Prepared as shown in the general experimental procedure (a). **IR** (Neat,  $\text{cm}^{-1}$ ): 2982, 2230, 1733, 1206, 1057;  $^1\text{H NMR}$  (400 MHz,  $\text{CDCl}_3$ )  $\delta$  8.74 (d,  $J = 8.6$  Hz, 1 H), 8.57 (d,  $J = 8.0$  Hz, 1 H), 8.13-8.08 (m, 2 H), 7.98 (d,  $J = 8.3$  Hz, 1 H), 7.85-7.76 (m, 2 H), 4.43 (q,  $J = 7.1$  Hz, 6 H), 1.33 (t,  $J = 7.1$  Hz, 9 H);  $^{13}\text{C NMR}$  (100 MHz,  $\text{CDCl}_3$ )  $\delta$  165.1, 153.7, 143.3, 135.9,

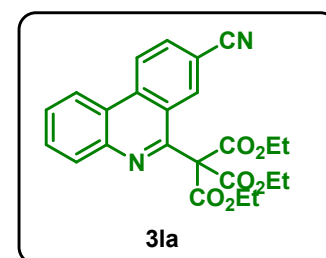

131.9, 131.2, 130.7, 130.3, 128.6, 124.8, 123.8, 122.9, 122.4, 118.3, 110.3, 74.7, 63.1, 13.8 ;  
**HRESI-MS** (*m/z*): Calculated for C<sub>24</sub>H<sub>22</sub>N<sub>2</sub>O<sub>6</sub>H (M + H): 435.1556, found (M + H): 435.1575.

13. **triethyl (8-acetylphenanthridin-6-yl)methanetricarboxylate (3ma)**. White solid; Yield – (59.8 mg, 66%); **mp**: 136-138 °C; Prepared as shown in the general experimental procedure (a). **IR** (Neat, cm<sup>-1</sup>): 2981, 2937, 1731, 1686, 1249, 1057; **<sup>1</sup>H NMR** (400 MHz, CDCl<sub>3</sub>) δ 8.71 (d, *J* = 8.6 Hz, 1 H), 8.59 (d, *J* = 8.0 Hz, 1 H), 8.39 (s, 1 H), 8.36 (d, *J* = 8.6 Hz, 1 H), 8.11 (d, *J* = 7.9 Hz, 1 H), 7.81-7.72 (m, 2 H), 4.41 (q, *J* = 7.0 Hz, 6 H), 2.69 (s, 3 H), 1.30 (t, *J* = 7.4 Hz, 9H); **<sup>13</sup>C NMR** (100 MHz, CDCl<sub>3</sub>) δ 196.9, 166.0, 165.5, 154.8, 143.3, 136.4, 134.7, 130.6, 129.7, 128.4, 128.1, 128.0, 124.7, 123.5, 123.0, 122.5, 74.9, 63.3, 63.0, 26.4, 13.9; **HRESI-MS** (*m/z*): Calculated for C<sub>25</sub>H<sub>25</sub>NO<sub>7</sub>Na (M + Na): 474.1529, found (M + H): 474.1531.

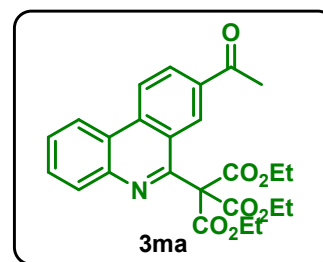

14. **triethyl (7,9-dichlorophenanthridin-6-yl)methanetricarboxylate (3na)**. White solid; Yield – (83.8 mg, 88%); **mp**: 177-179 °C; Prepared as shown in the general experimental procedure (a). **IR** (Neat, cm<sup>-1</sup>): 2982, 1746, 1592, 1197, 1062; **<sup>1</sup>H NMR** (400 MHz, CDCl<sub>3</sub>) δ 8.62 (s, 1 H), 8.44 (d, *J* = 8.1 Hz, 1 H), 8.01 (d, *J* = 7.9 Hz, 1 H), 7.77-7.67 (m, 3 H), 4.53-4.48 (m, 2 H), 4.31-4.30 (m, 4 H), 1.44 (t, *J* = 7.08, 3 H), 1.21 (s, 6 H); **<sup>13</sup>C NMR** (100 MHz, CDCl<sub>3</sub>) δ 166.9, 165.5, 152.6, 141.7, 137.1, 135.6, 132.7, 130.5, 130.1, 129.8, 128.4, 122.5, 122.3, 122.1, 121.8, 77.8, 62.9, 62.6, 14.0, 13.6; **HRESI-MS** (*m/z*): Calculated for C<sub>23</sub>H<sub>21</sub>Cl<sub>2</sub>NO<sub>6</sub>Na (M + Na): 500.0644, found (M + Na): 500.0643.

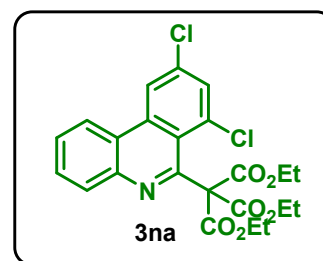

15. **triethyl benzo[*c*]phenanthridin-6-ylmethanetricarboxylate (3oa)**. White solid; Yield – (50.4 mg, 64%); **mp**: 150-152 °C; Prepared as shown in the general experimental procedure (a). **IR** (Neat, cm<sup>-1</sup>): 2982, 2925, 1736, 1225, 1059; **<sup>1</sup>H NMR** (400 MHz, CDCl<sub>3</sub>) δ 9.23 (d, *J* = 7.9 Hz, 1 H), 8.74 (d, *J* = 8.4 Hz, 1 H), 8.56 (d, *J* = 9.0 Hz, 1 H), 8.06 (d, *J* = 8.9 Hz, 1 H), 7.99-7.97 (m, 1 H), 7.90-7.84 (m, 2 H), 7.75-7.63 (m, 3 H), 4.45 (q, *J* = 7.1 Hz, 6 H), 1.27 (t, *J* = 7.1 Hz, 9 H); **<sup>13</sup>C NMR** (100 MHz, CDCl<sub>3</sub>) δ 165.7, 153.0, 139.2, 133.6, 133.1, 131.9, 130.0, 128.4, 127.5, 127.3, 126.8, 126.6, 126.3, 125.6, 124.7, 75.2, 62.7, 13.8; **HRESI-MS** (*m/z*): Calculated for C<sub>27</sub>H<sub>25</sub>NO<sub>6</sub>H (M + H): 460.1760, found (M + H): 460.1759.

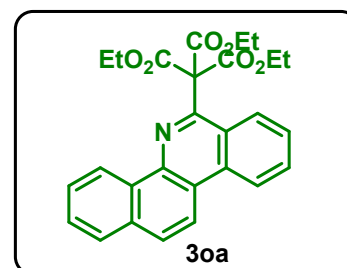

16. **triethyl (8-methoxy-2-methylphenanthridin-6-yl)methanetricarboxylate (3pa)**. White solid; Yield – (64.4 mg, 71%); **mp**: 133-135 °C; Prepared as shown in the general experimental procedure (a). **IR** (Neat, cm<sup>-1</sup>): 2981, 2926, 1737, 1222, 1058; **<sup>1</sup>H NMR** (400 MHz, CDCl<sub>3</sub>) δ 8.55 (d, *J* = 9.12 Hz, 1 H), 8.27 (s, 1 H), 7.95 (d, *J* = 8.3 Hz, 1 H), 7.48 (d, *J* = 8.2 Hz, 1 H), 7.43 (dd, *J*<sub>1</sub> = 9.1 Hz, *J*<sub>2</sub> = 2.4 Hz, 1 H), 7.08 (d, *J* = 2.4 Hz, 1 H), 4.38 (q, *J* = 7.1 Hz, 6 H), 3.87 (s, 3 H), 2.64 (s, 3 H), 1.27 (t, *J* = 7.1 Hz, 9 H); **<sup>13</sup>C NMR** (100 MHz, CDCl<sub>3</sub>) δ 165.7, 158.0, 152.6, 140.1, 137.6, 130.2, 129.2, 127.5, 126.5, 124.1, 124.0, 120.9, 120.8, 106.2, 74.9, 62.7, 55.3, 22.1, 13.9; **HRESI-MS** (*m/z*): Calculated for C<sub>25</sub>H<sub>27</sub>NO<sub>7</sub>H (M + H): 454.1866, found (M + H): 454.1865.

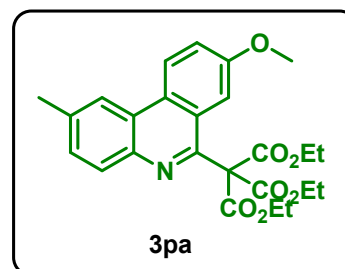

17. **triethyl (8-cyano-2-methylphenanthridin-6-yl)methanetricarboxylate (3qa)**. White solid;

Yield – (42.3 mg, 47%); **mp**: 130-132 °C; Prepared as shown in the general experimental procedure (a). **IR** (Neat,  $\text{cm}^{-1}$ ): 2226, 1734, 1216, 1054;  **$^1\text{H NMR}$**  (400 MHz,  $\text{CDCl}_3$ )  $\delta$  8.71 (d,  $J = 8.5$  Hz, 1 H), 8.32 (s, 1 H), 8.07 (s, 1 H), 7.99 (d,  $J = 8.3$  Hz, 1 H), 7.94 (dd,  $J_1 = 8.5$  Hz,  $J_2 = 1.2$  Hz, 1 H), 7.63 (d,  $J = 8.3$  Hz, 1 H), 4.42 (q,  $J = 7.1$  Hz, 6 H), 2.66 (s, 3 H), 1.32 (t,  $J = 7.1$  Hz, 9 H);  **$^{13}\text{C NMR}$**  (100 MHz,  $\text{CDCl}_3$ )  $\delta$  165.2, 152.6, 141.7, 138.8, 135.6, 132.0, 131.9, 131.0, 130.4, 124.8, 123.8, 122.7, 121.9, 118.4, 110.1, 74.7, 63.0, 22.0, 13.9; **HRESI-MS** ( $m/z$ ): Calculated for  $\text{C}_{25}\text{H}_{24}\text{N}_2\text{O}_6\text{Na}$  ( $M + \text{Na}$ ): 471.1532, found ( $M + \text{H}$ ): 471.1533.

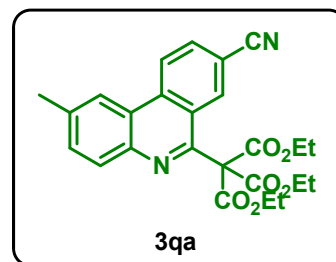

18. **triethyl (2-methyl-8-(trifluoromethyl)phenanthridin-6-yl)methanetricarboxylate (3ra)**. White solid; Yield – (79.8 mg, 81%); **mp**: 102-104 °C; Prepared as shown in the general experimental procedure (a). **IR** (Neat,  $\text{cm}^{-1}$ ): 2983, 1731, 1210, 1124, 1056;  **$^1\text{H NMR}$**  (400 MHz,  $\text{CDCl}_3$ )  $\delta$  8.75 (d,  $J = 8.7$  Hz, 1 H), 8.35 (s, 1 H), 8.02-7.96 (m, 3 H), 7.61 (d,  $J = 8.2$  Hz, 1 H), 4.40 (q,  $J = 7.1$  Hz, 6 H), 2.66 (s, 3 H), 1.29 (t,  $J = 7.1$  Hz, 9 H);  **$^{13}\text{C NMR}$**  (100 MHz,  $\text{CDCl}_3$ )  $\delta$  165.3, 153.4, 141.4, 138.4, 135.2, 131.2, 130.4, 128.3 (q,  $J = 32.5$  Hz), 125.6 (q,  $J = 2.9$  Hz), 124.1 (q,  $J = 4.2$  Hz), 123.8 (q,  $J = 270.8$  Hz), 123.5, 121.8, 74.8, 62.9, 22.0, 13.8; **HRESI-MS** ( $m/z$ ): Calculated for  $\text{C}_{25}\text{H}_{24}\text{F}_3\text{NO}_6\text{H}$  ( $M + \text{H}$ ): 492.1634, found ( $M + \text{H}$ ): 492.1632.

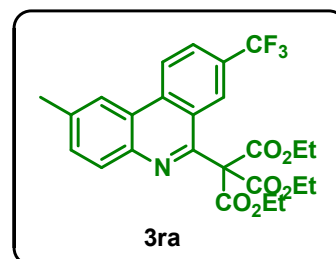

19. **Triethyl (2-(((2-isopropyl-5-methylcyclohexyl)oxy)carbonyl)phenanthridin-6-yl)methanetricarboxylate (3sa)**. White solid; Yield – (96.9 mg, 80%); **mp**: 62-64 °C; Prepared as shown in the general experimental procedure (a). **IR** (Neat,  $\text{cm}^{-1}$ ): 2955, 2928, 2869, 1738, 1712, 1285, 1254, 1060;  **$^1\text{H NMR}$**  (400 MHz,  $\text{CDCl}_3$ )  $\delta$  9.32 (s, 1 H), 8.77 (d,  $J = 8.3$  Hz, 1 H), 8.33 (d,  $J_1 = 8.5$  Hz,  $J_2 = 1.5$  Hz, 1 H), 8.12 (d,  $J = 8.5$  Hz, 1 H), 7.88 (t,  $J = 7.5$  Hz, 1 H), 7.79 (d,  $J = 8.3$  Hz, 1 H), 7.65 (t,  $J = 7.5$  Hz, 1 H), 5.07 (td,  $J_1 = 10.9$  Hz,  $J_2 = 4.2$  Hz, 1 H), 4.37 (q,  $J = 7.1$  Hz, 6 H), 2.24-2.21 (m, 1 H), 2.07-2.01 (m, 1 H), 1.80-1.77 (m, 2 H), 1.71-1.63 (m, 2 H), 1.27-1.22 (m, 11 H), 0.99-0.97 (m, 7H), 0.86 (d,  $J = 6.8$  Hz, 3 H);  **$^{13}\text{C NMR}$**  (100 MHz,  $\text{CDCl}_3$ )  $\delta$  165.9, 165.3, 156.7, 144.8, 133.3, 130.7, 130.5, 129.5, 128.5, 127.3, 126.4, 125.3, 124.5, 123.7, 122.7, 75.3, 74.7, 62.8, 47.3, 41.0, 34.3, 31.4, 26.6, 23.7, 22.0, 20.7, 16.6, 13.8; **HRESI-MS** ( $m/z$ ): Calculated for  $\text{C}_{34}\text{H}_{41}\text{NO}_8\text{H}$  ( $M + \text{H}$ ): 592.2910, found ( $M + \text{H}$ ): 592.2913.

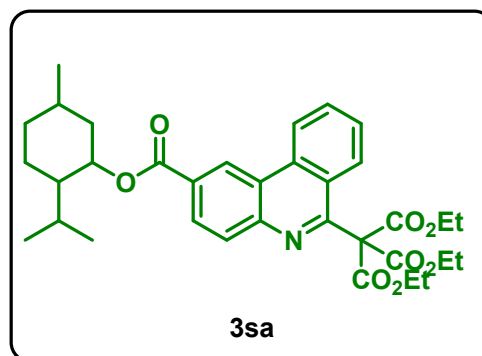

20. **trimethyl phenanthridin-6-ylmethanetricarboxylate (3ta)**. White solid; Yield – (49.2 mg, 67%); **mp**: 190-192 °C; Prepared as shown in the general experimental procedure (a). **IR** (Neat,  $\text{cm}^{-1}$ ): 2952, 1742, 1232, 1066;  **$^1\text{H NMR}$**  (400 MHz,  $\text{CDCl}_3$ )  $\delta$  8.69 (d,  $J = 8.3$  Hz, 1 H), 8.60-8.58 (m, 1 H), 8.11-8.08 (m, 1 H), 7.84 (t,  $J = 8$  Hz, 1 H), 7.76-7.70 (m, 3 H), 7.64-7.60 (m, 1 H), 3.89 (s, 9 H);  **$^{13}\text{C NMR}$**  (100 MHz,  $\text{CDCl}_3$ )  $\delta$  165.9, 154.2, 142.3, 133.3, 130.7, 130.2,

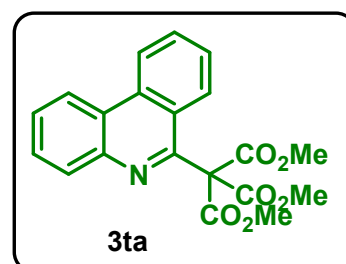



128.6, 127.8, 127.1, 125.0, 124.2, 121.8, 74.6, 53.7; **HRESI-MS** (*m/z*): Calculated for C<sub>20</sub>H<sub>17</sub>NO<sub>6</sub>H (M + H): 368.1134, found (M + H): 368.1138.

21. **trimethyl phenanthridin-6-ylmethanetricarboxylate (3ua)**. White solid; Yield – (51.4 mg, 65%); **mp**: 179-181 °C; Prepared as shown in the general experimental procedure (a). **IR** (Neat, cm<sup>-1</sup>): 2923, 2855, 1740, 1510, 1458, 1352, 1251, 1172, 1065; **<sup>1</sup>H NMR** (400 MHz, CDCl<sub>3</sub>) δ 8.68 (d, *J* = 8.3 Hz, 1 H), 8.60-8.58 (m, 1 H), 8.11-8.09 (m, 1 H), 7.85-7.81 (m, 1 H), 7.76-7.71 (m, 3 H), 7.63-7.60 (m, 1 H), 4.39 (t, *J* = 7.1 Hz, 4 H), 3.87 (s, 3 H), 1.27 (t, *J* = 7.1 Hz, 6 H); **<sup>13</sup>C NMR** (100 MHz, CDCl<sub>3</sub>) δ 166.2, 165.4, 154.4, 142.4, 133.2, 130.5, 130.1, 128.5, 127.7, 126.8, 126.1, 125.1, 124.1, 122.5, 121.8, 74.7, 62.7, 53.5, 13.8; **HRESI-MS** (*m/z*): Calculated for C<sub>22</sub>H<sub>21</sub>NO<sub>6</sub>H (M + H): 396.1447, found (M + H): 396.1448.

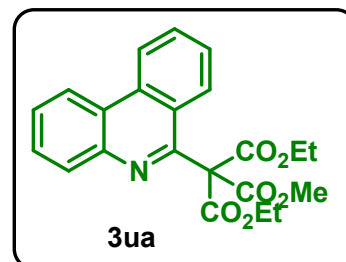

22. **triethyl (3-(ethoxycarbonyl)-4-phenylisoquinolin-1-yl)methanetricarboxylate (4aa)**. white sticky solid; Yield – (85.2 mg, 70%); Prepared as shown in the general experimental procedure (b). **IR** (Neat, cm<sup>-1</sup>): 2982, 1735, 1221, 1059; **<sup>1</sup>H NMR** (400 MHz, CDCl<sub>3</sub>) δ 7.80-7.70 (m, 1 H), 7.67-7.64 (m, 1 H), 7.61-7.59 (m, 2 H), 7.51-7.50 (m, 3 H), 7.38-7.36 (m, 2 H), 4.39 (q, *J* = 7.1 Hz, 6 H), 4.11 (q, *J* = 7.1 Hz, 2 H), 1.29 (t, *J* = 7.1 Hz, 9 H), 1.05 (t, *J* = 7.1 Hz, 3 H); **<sup>13</sup>C NMR** (100 MHz, CDCl<sub>3</sub>) δ 166.2, 165.4, 153.4, 139.7, 136.4, 136.1, 134.7, 130.0, 129.7, 128.1, 128.0, 127.9, 127.8, 127.2, 125.5, 74.5, 62.8, 60.9, 13.8; **HRESI-MS** (*m/z*): Calculated for C<sub>28</sub>H<sub>29</sub>NO<sub>8</sub>H (M + H): 508.1971, found (M + H): 508.1973.

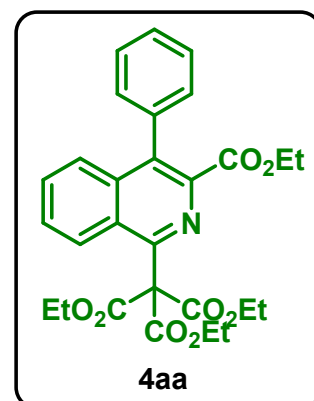

23. **triethyl (3-(methoxycarbonyl)-4-phenylisoquinolin-1-yl)methanetricarboxylate (4ba)**. White solid; Yield – (78.3 mg, 79%); **mp**: 90-92 °C; Prepared as shown in the general experimental procedure (b). **IR** (Neat, cm<sup>-1</sup>): 2982, 2925, 1733, 1221, 1058; **<sup>1</sup>H NMR** (400 MHz, CDCl<sub>3</sub>) δ 7.79-7.78 (m, 1 H), 7.63-7.61 (m, 3 H), 7.52-7.50 (m, 3 H), 7.35 (d, *J* = 7.2 Hz, 2 H), 4.39 (q, *J* = 7.2 Hz, 6 H), 3.69 (s, 3 H), 1.29 (t, *J* = 7.1 Hz, 9 H); **<sup>13</sup>C NMR** (100 MHz, CDCl<sub>3</sub>) δ 166.5, 165.4, 153.4, 138.9, 136.5, 135.9, 135.3, 130.0, 129.5, 128.2, 128.1, 127.9, 127.4, 125.5, 74.5, 62.8, 51.9, 13.8; **HRESI-MS** (*m/z*): Calculated for C<sub>27</sub>H<sub>27</sub>NO<sub>8</sub>Na (M + Na): 516.1634, found (M + H): 516.1631.

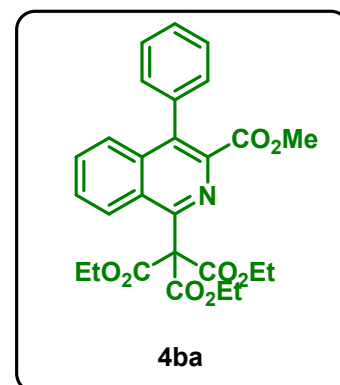

24. **trimethyl (3-(methoxycarbonyl)-4-phenylisoquinolin-1-yl)methanetricarboxylate (4ca)**. White solid; Yield – (61.9 mg, 69%); **mp**: 168-170 °C; Prepared as shown in the general experimental procedure (b). **IR** (Neat, cm<sup>-1</sup>): 2953, 1736, 1433, 1226, 1065; **<sup>1</sup>H NMR** (400 MHz, CDCl<sub>3</sub>) δ 7.74-7.72 (m, 1 H), 7.64-7.62 (m, 3 H), 7.52-7.51 (m, 3 H), 7.34-7.33 (m, 2 H), 3.90 (s, 9 H), 3.69 (s, 3 H); **<sup>13</sup>C NMR** (100 MHz, CDCl<sub>3</sub>) δ 166.3, 165.8, 153.1, 138.5, 136.7, 135.9, 130.2, 129.5, 128.6, 128.1, 128.0, 127.9, 127.7, 125.0, 74.4, 53.8, 52.1; **HRESI-MS**

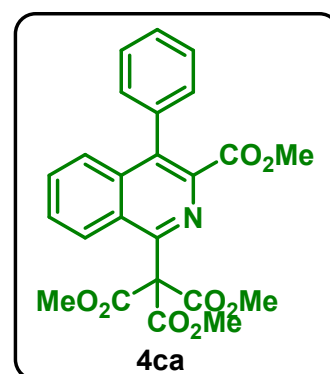

(*m/z*): Calculated for C<sub>24</sub>H<sub>21</sub>NO<sub>8</sub>Na (M + Na): 474.1165, found (M + H): 474.1165.

25. **triethyl(3-(methoxycarbonyl)-6-methyl-4-(*p*-tolyl)isoquinolin-1-yl)methanetricarboxylate (4da)**. White solid; Yield – (64.7 mg, 62%); *mp*: 105-107 °C; Prepared as shown in the general experimental procedure (b). IR (Neat, cm<sup>-1</sup>): 2981, 2923, 1736, 1221, 1059; <sup>1</sup>H NMR (400 MHz, CDCl<sub>3</sub>) δ 7.56 (d, *J* = 8.7 Hz, 1 H), 7.51 (s, 1 H), 7.42 (dd, *J*<sub>1</sub> = 8.6 Hz, *J*<sub>2</sub> = 1.2 Hz, 1 H), 7.32 (d, *J* = 7.9 Hz, 2 H), 7.22 (d, *J* = 7.9 Hz, 2 H), 4.40 (q, *J* = 7.1 Hz, 6 H), 3.70 (s, 3 H), 2.50 (s, 3 H), 2.48 (s, 3 H), 1.29 (t, *J* = 7.1 Hz, 9 H); <sup>13</sup>C NMR (100 MHz, CDCl<sub>3</sub>) δ 166.6, 165.5, 152.4, 138.5, 138.0, 137.5, 135.6, 135.0, 133.0, 132.2, 129.3, 128.8, 128.2, 127.3, 124.3, 74.4, 62.8, 51.9, 22.2, 21.3, 13.7; **HRESI-MS** (*m/z*): Calculated for C<sub>29</sub>H<sub>31</sub>NO<sub>8</sub>H (M + H): 522.2128, found (M + H): 522.2128.

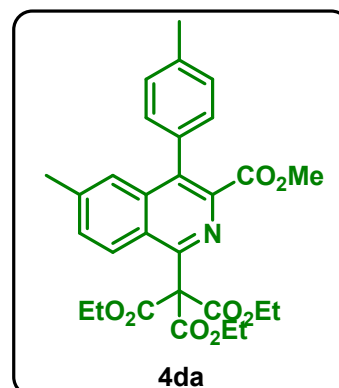

26. **Triethyl (6-fluoro-4-(4-fluorophenyl)-3-(methoxycarbonyl)isoquinolin-1-yl)methanetricarboxylate (4ea)**. White solid; Yield – (83.8 mg, 79%); *mp*: 124-126 °C; Prepared as shown in the general experimental procedure (b). IR (Neat, cm<sup>-1</sup>): 2984, 1735, 1220, 1196, 1058; <sup>1</sup>H NMR (400 MHz, CDCl<sub>3</sub>) δ 7.65-7.61 (m, 1 H), 7.43-7.39 (m, 2 H), 7.33-7.29 (m, 2 H), 7.24-7.20 (m, 2 H), 4.41 (q, *J* = 7.1 Hz, 6 H), 3.70 (s, 3 H), 1.32 (t, *J* = 7.1 Hz, 9 H); <sup>13</sup>C NMR (100 MHz, CDCl<sub>3</sub>) δ 166.1, 165.1, 162.6 (d, *J*<sub>c-f</sub> = 245.8 Hz), 161.3 (d, *J*<sub>c-f</sub> = 251.1 Hz), 153.1 (d, *J*<sub>c-f</sub> = 5.5 Hz), 138.7, 134.3, 131.5 (d, *J*<sub>c-f</sub> = 3.6 Hz), 131.3 (d, *J*<sub>c-f</sub> = 8.0 Hz), 130.2 (d, *J*<sub>c-f</sub> = 8.8 Hz), 129.3 (d, *J*<sub>c-f</sub> = 8.9 Hz), 120.8 (d, *J*<sub>c-f</sub> = 24.7 Hz), 115.5 (d, *J*<sub>c-f</sub> = 21.5 Hz), 109.8 (d, *J*<sub>c-f</sub> = 22.3 Hz), 74.5, 63.0, 52.0, 13.8; **HRESI-MS** (*m/z*): Calculated for C<sub>27</sub>H<sub>25</sub>F<sub>2</sub>NO<sub>8</sub>H (M + H): 530.1626, found (M + H): 530.1624.

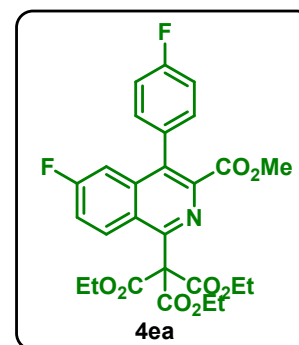

## Product modification

### Synthesis of dicarbonyl 5aa:

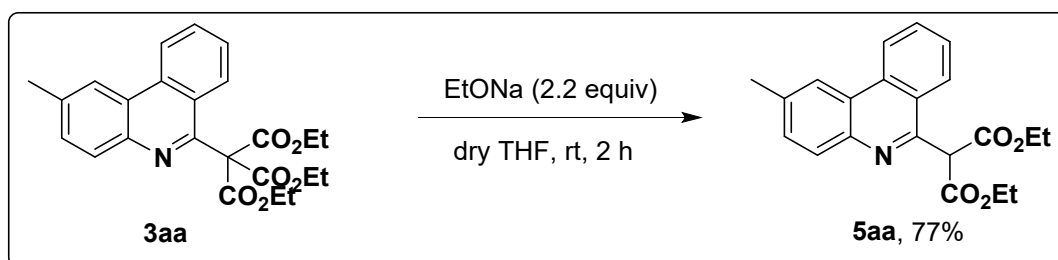

The compound **3aa** (0.2 mmol, 1 equiv) in dry THF (2 mL) was added dropwise to a well stirred solution of sodium ethoxide (0.44 mmol, 2.2 equiv) in THF (2 mL) under argon at rt. After stirring at rt for 2 h the solution was acidified with 1N HCl and diluted with ethyl acetate (10 mL). The organic layer was collected and washed with water, sat. NaHCO<sub>3</sub> solution, brine. The organic layer collected was then dried over Na<sub>2</sub>SO<sub>4</sub>. The solvent was concentrated in rotatory evaporator followed by *in vacuo* and purified by silica gel (230-400 mesh) column chromatography with EtOAc/petroleum ether mixture to provide the pure dicarbonyl product **5aa** (54.1 mg, 77% yield)

### diethyl 2-(2-methylphenanthridin-6-yl)malonate (**5aa**)

White solid; Yield – (54.1 mg, 77%); *mp*: 129-131 °C; IR (Neat, cm<sup>-1</sup>): 2981, 1737, 1451, 1365, 1304, 1252, 1179, 1148, 1097, 1035; <sup>1</sup>H NMR δ (CDCl<sub>3</sub>, 400 MHz): 8.65 (d, *J* = 8.2 Hz, 1 H), 8.34 (s, 1 H), 8.07-7.99 (m, 2 H), 7.85-7.81 (m, 1 H), 7.69-7.65 (m, 1 H), 7.56 (d, *J* = 8.3 Hz, 1 H), 5.65 (s, 1 H), 4.41-4.29 (m, 4 H), 2.63 (s, 3 H), 1.30 (t, *J* = 7.1 Hz, 6 H); <sup>13</sup>C NMR δ (CDCl<sub>3</sub>, 100 MHz): 167.5, 152.5, 141.5, 137.2, 132.9, 130.3, 130.2, 130.1, 127.3, 125.0, 124.9, 123.7, 122.5, 121.4, 61.9, 59.3, 21.9, 14.0; HRMS (ESI) (*m/z*): Calculated for C<sub>21</sub>H<sub>21</sub>NO<sub>4</sub>H [M+H]: 352.1549, found [M+H]: 352.1551.

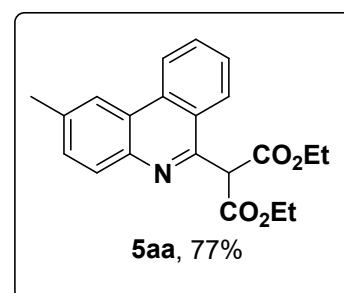

### Synthesis of 2,6-dimethylphenanthridine **6aa**:

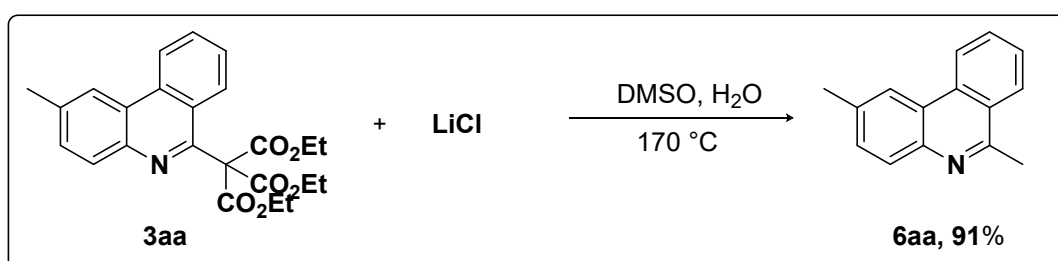

DMSO (2 mL) solution of the compound triethyl (2-methylphenanthridin-6-yl)methanetricarboxylate, **3aa** (84.69 mg, 0.2 mmol, 1.0 equiv.), LiCl (27.13 mg, 0.64 mmol, 3.2 equiv), and water (7 mg, 0.4 mmol, 2.0 equiv.) was heated at 170°C for 2 h. After cooling down to room temperature, the reaction mixture was washed with water (10 mL), and the aqueous layer was extracted with diethyl ether (3x20 mL). The combined organic layers were washed with brine (10 mL), dried over anhydrous Na<sub>2</sub>SO<sub>4</sub>, and then concentrated under



reduced pressure to give a crude product. The crude product was purified by flash chromatography on silica gel using EtOAc/petroleum ether as the eluant in 91% (37.7 mg) yield.

### 2,6-dimethylphenanthridine (6aa)

White solid; Yield – (37.7 mg, 91%); IR (Neat,  $\text{cm}^{-1}$ ): 2922, 2854, 1582, 1495, 1457, 1375, 1315, 1244, 1187, 1082, 825, 760;  $^1\text{H NMR } \delta$  ( $\text{CDCl}_3$ , 400 MHz): 8.63 (d,  $J = 8.3$  Hz, 1 H), 8.34 (s, 1 H), 8.22 (d,  $J = 8.1$  Hz, 1 H), 8.02 (d,  $J = 8.3$  Hz, 1 H), 7.86-7.82 (m, 1 H), 7.71-7.67 (m, 1 H), 7.56-7.54 (m, 1 H), 3.05 (s, 3 H), 2.63 (s, 3 H);  $^{13}\text{C NMR } \delta$  ( $\text{CDCl}_3$ , 100 MHz): 157.8, 141.8, 136.0, 132.3, 130.3, 130.2, 128.9, 127.1, 126.4, 125.9, 123.5, 122.2, 121.5, 23.2, 21.8; HRMS (ESI) ( $m/z$ ): Calculated for  $\text{C}_{15}\text{H}_{13}\text{NH}$  [ $\text{M}+\text{H}$ ]: 208.1126, found [ $\text{M}+\text{H}$ ]: 208.1128.

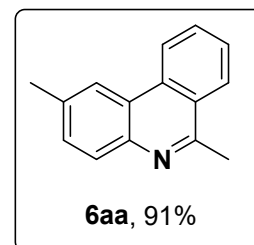

## Mechanistic Studies:

### Tempo Quenching Studies

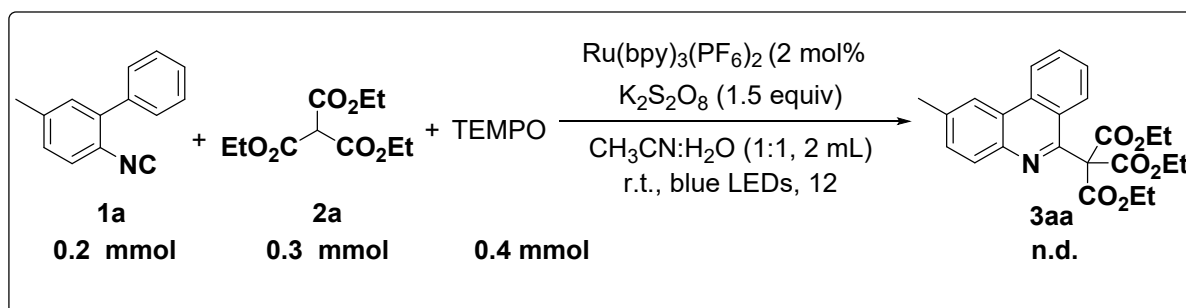

In a 8 mL screw cap reaction vial equipped with a magnetic stirrer bar was added 2-isocyano-5-methyl-1,1'-biphenyl **1a** as ortho-aryl isocyanide (0.2 mmol, 1 equiv.), tricarbonyl **2a** (0.3 mmol, 1.5 equiv.),  $\text{K}_2\text{S}_2\text{O}_8$  (0.3 mmol, 1.5 equiv.), 2,2,6,6-tetramethylpiperidinyloxy (0.4 mmol, 2 equiv.),  $\text{Ru}(\text{bpy})_3(\text{PF}_6)_2$  (0.004 mmol, 2 mol%). 2 mL of degassed  $\text{CH}_3\text{CN}:\text{H}_2\text{O}$  (1:1) was added to the vial then and it was purged three times with argon and was sealed with a cap containing PTFE-lined silicone septa. The reaction vial was then degassed with argon for 15 min via an inlet needle. After this, the cap was changed with a PTFE-lined solid-top cap under argon flow and the vial was irradiated with a blue LED strip (1.5 mW/cm<sup>2</sup>, at a distance of 2 cm) for 12 h. The temperature of the reaction vial was maintained at approximately 25 °C via a fan. After the reaction was stopped, the reaction mixture was transferred to a separatory funnel and diluted with EtOAc (10 mL) and water (10 mL). The residue was extracted with EtOAc (10 mL x 3) and washed with brine (saturated aq NaCl, 10 mL). The combined organic layer was dried over  $\text{Na}_2\text{SO}_4$  and the solvent was removed in rotatory evaporator followed by in vacuo. The crude product was then purified by column chromatography on silica gel (230-400 mesh) using EtOAc/petroleum ether mixture.

## Crystal Data:

### Crystal data for 3fa:

The ORTEP diagram and crystal parameters of **3fa** in thermal ellipsoids are drawn at 50% probability level. The crystal of suitable quality was obtained from slow evaporation of solution of pure isolated **3fa** in DCM/hexane and was analyzed by single crystal diffractometer. Atomic coordinates, bond lengths, bond angles, and thermal parameters for this compound have been deposited at the Cambridge Crystallographic Data Centre. CCDC 2344514 contains supplementary crystallographic data.

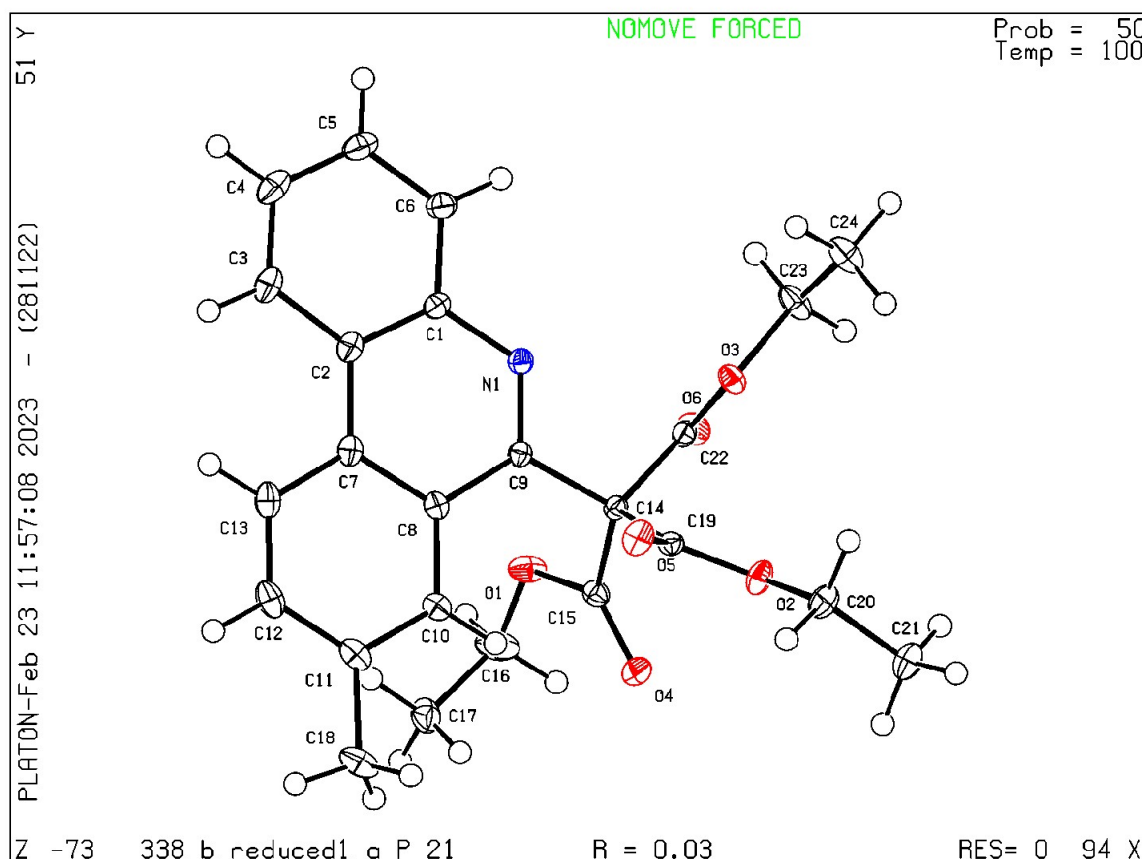

Bond precision: C-C = 0.0022 Å Wavelength = 0.71076

Cell: a=7.8789 (9) b=14.2204 (13) c=10.1298 (19)

alpha=90

beta=110.174 (7)

gamma=90

Temperature: 100 K

|                        | Calculated                                      | Reported                                        |
|------------------------|-------------------------------------------------|-------------------------------------------------|
| Volume                 | 1065.3 (3)                                      | 1065.3 (3)                                      |
| Space group            | P 21                                            | P 21                                            |
| Hall group             | P 2yb                                           | P 2yb                                           |
| Moiety formula         | C <sub>24</sub> H <sub>25</sub> NO <sub>6</sub> | ?                                               |
| Sum formula            | C <sub>24</sub> H <sub>25</sub> NO <sub>6</sub> | C <sub>24</sub> H <sub>25</sub> NO <sub>6</sub> |
| Mr                     | 423.45                                          | 423.45                                          |
| Dx, g cm <sup>-3</sup> | 1.320                                           | 1.320                                           |
| Z                      | 2                                               | 2                                               |

|                        |             |            |
|------------------------|-------------|------------|
| Mu (mm <sup>-1</sup> ) | 0.095       | 0.095      |
| F000                   | 448.0       | 448.0      |
| F000'                  | 448.24      |            |
| h, k, lmax             | 11, 20, 14  | 11, 20, 14 |
| Nref                   | 6535[ 3388] | 6437       |
| Tmin, Tmax             |             |            |
| Tmin'                  | 0.973       |            |

Correction method= Not given

Data completeness= 1.90/0.99; Theta(max)= 30.564; R (reflections) = 0.0336 ( 6269); S =1.086; Npar= 284; wR2 (reflections) = 0.0925 ( 6437).

## References:

1. (a) M. Tobisu, K. Koh, T. Furukawa and N. Chatani, *Angew. Chem. Int. Ed.*, 2012, **51**, 11363 –11366. (b) J. Rong, L. Deng, P. Tan, C. Ni, Y. Gu and J. Hu, *Angew. Chem. Int. Ed.*, 2016, **55**, 2743 –2747.
2. C. B. Kelly, N. R. Patel, D. N. Primer, M. Jouffroy, J. C. Tellis, G. A. Molander, *Nat. Protoc.*, 2017, **12**, 472-492.

Spectras:

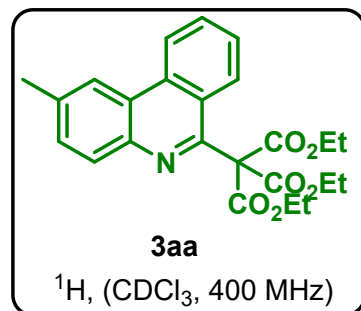

8.661  
8.640  
8.359  
7.990  
7.969  
7.816  
7.813  
7.796  
7.778  
7.775  
7.755  
7.735  
7.603  
7.601  
7.585  
7.583  
7.561  
7.556  
7.539  
7.535  
7.284

4.401  
4.383  
4.365  
4.347

2.649

1.273  
1.255  
1.237

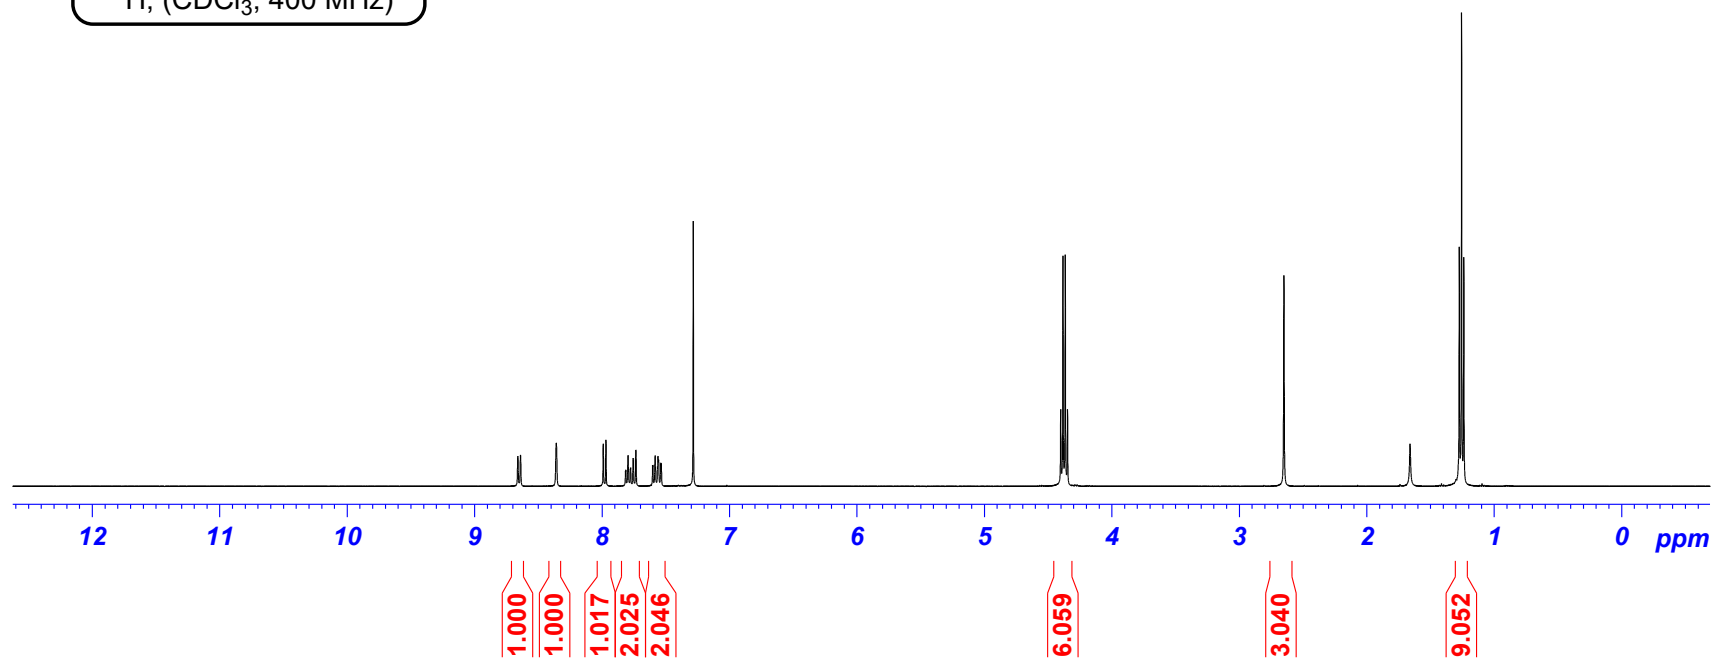

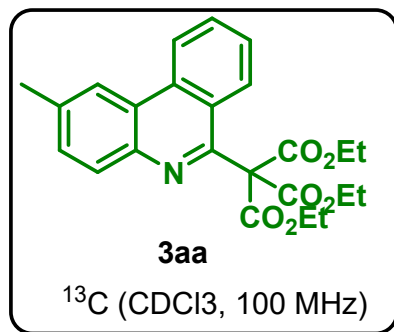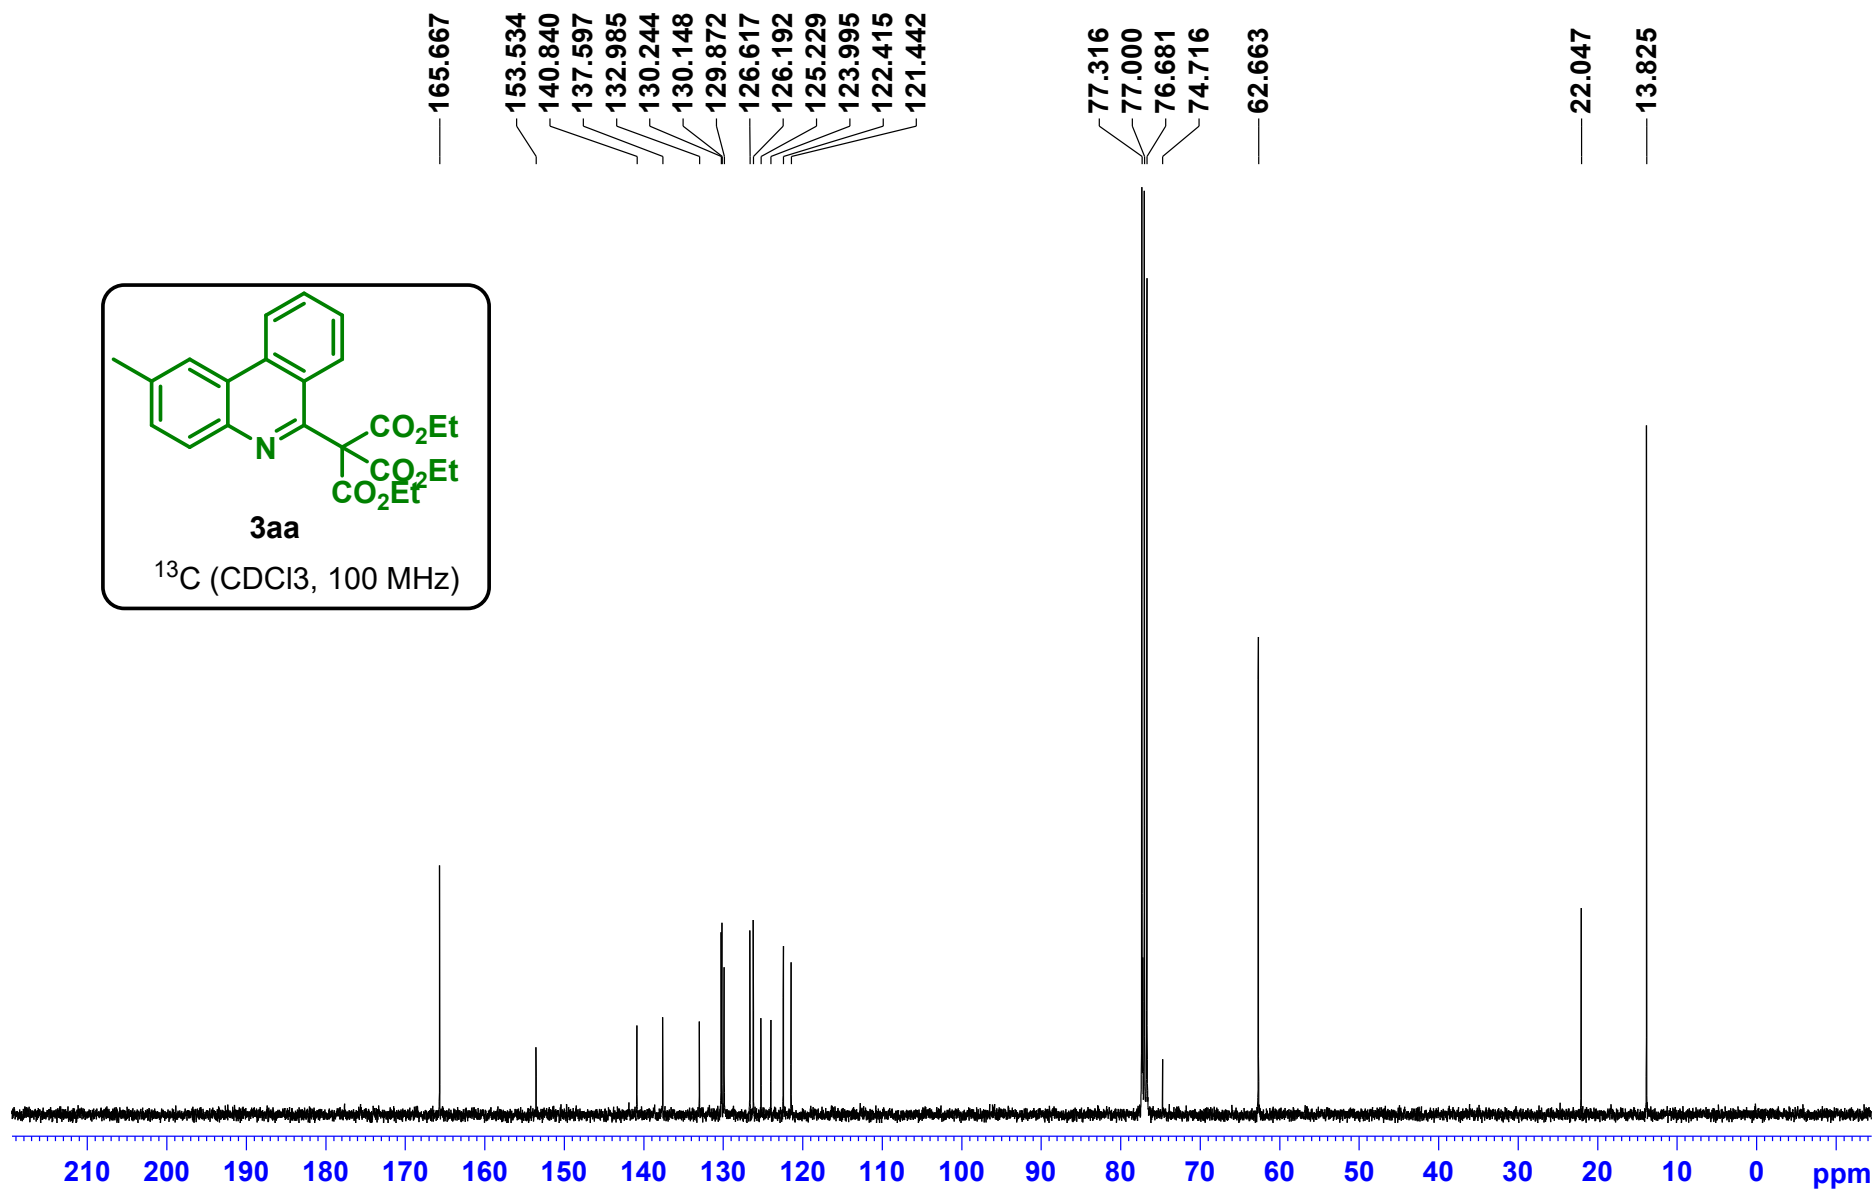

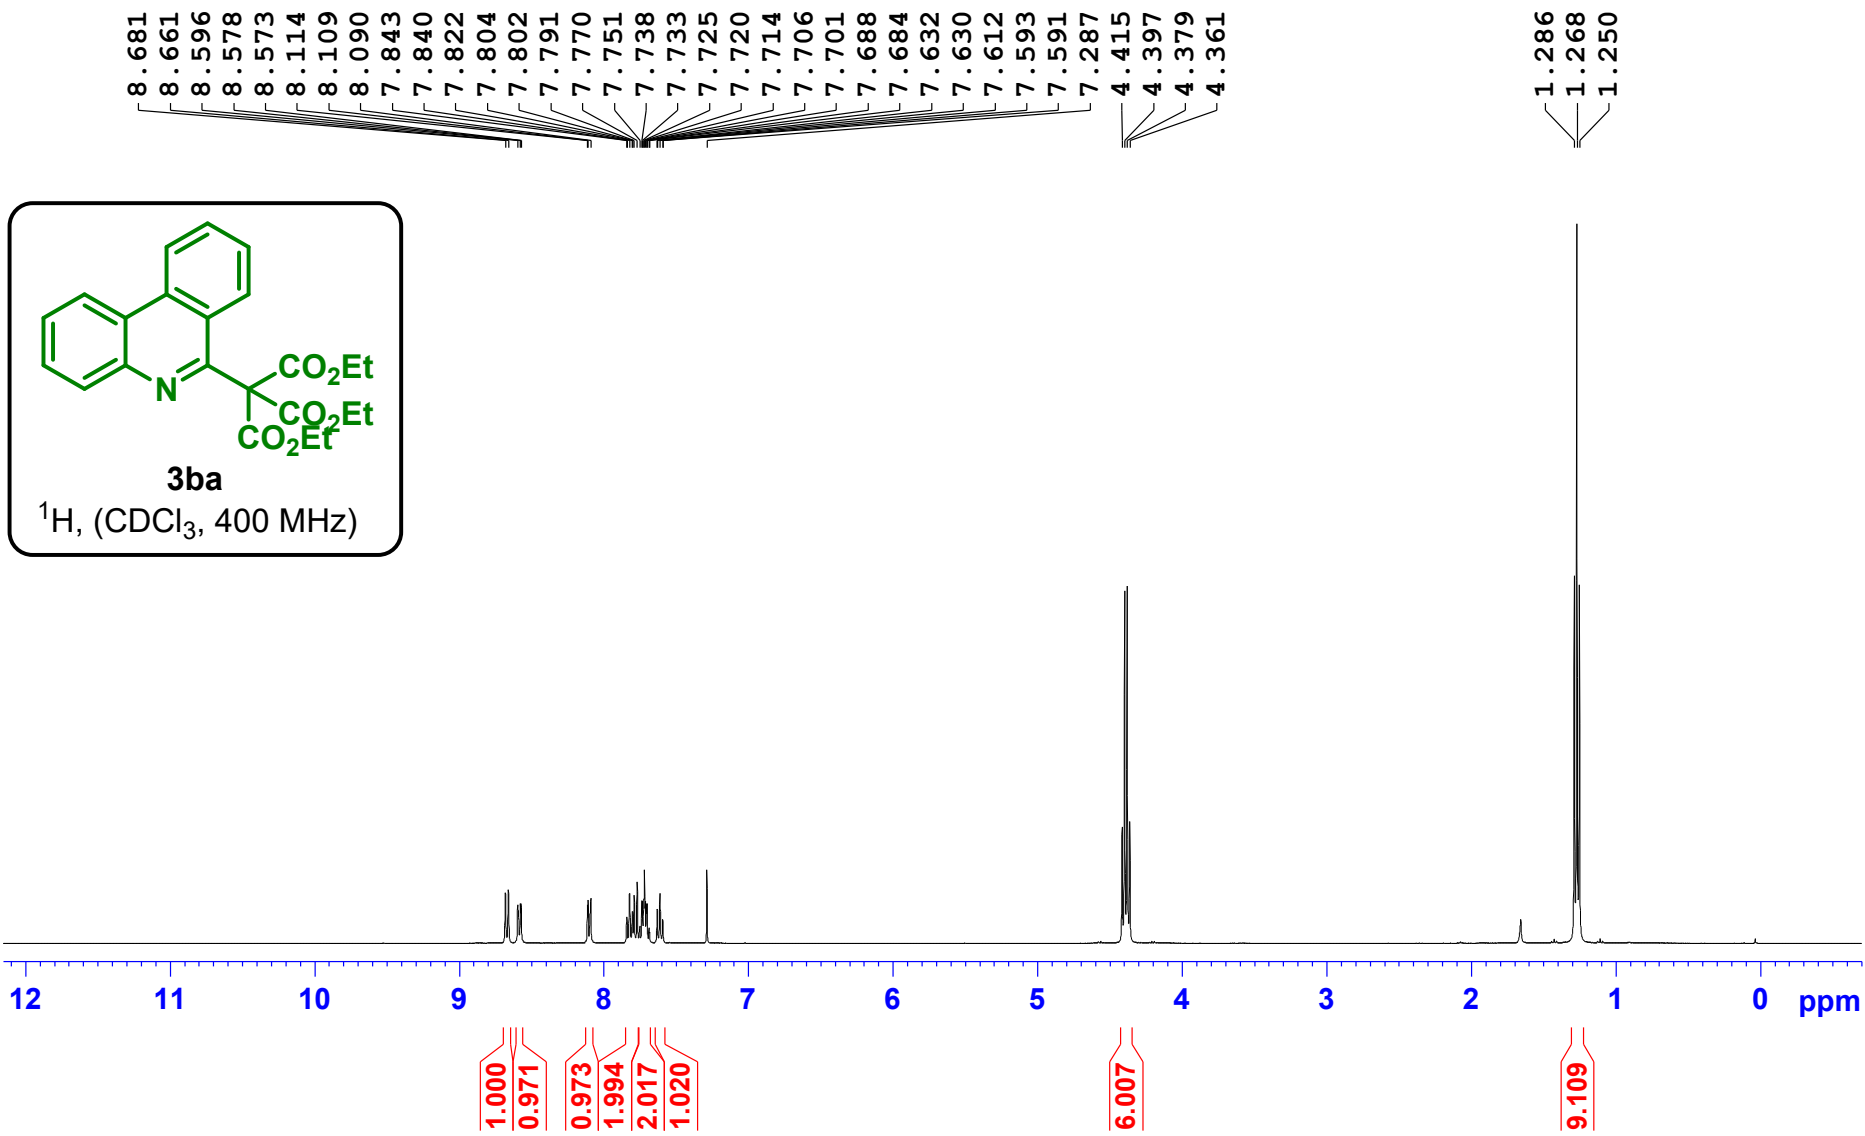

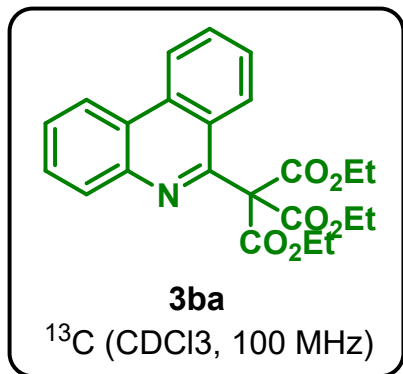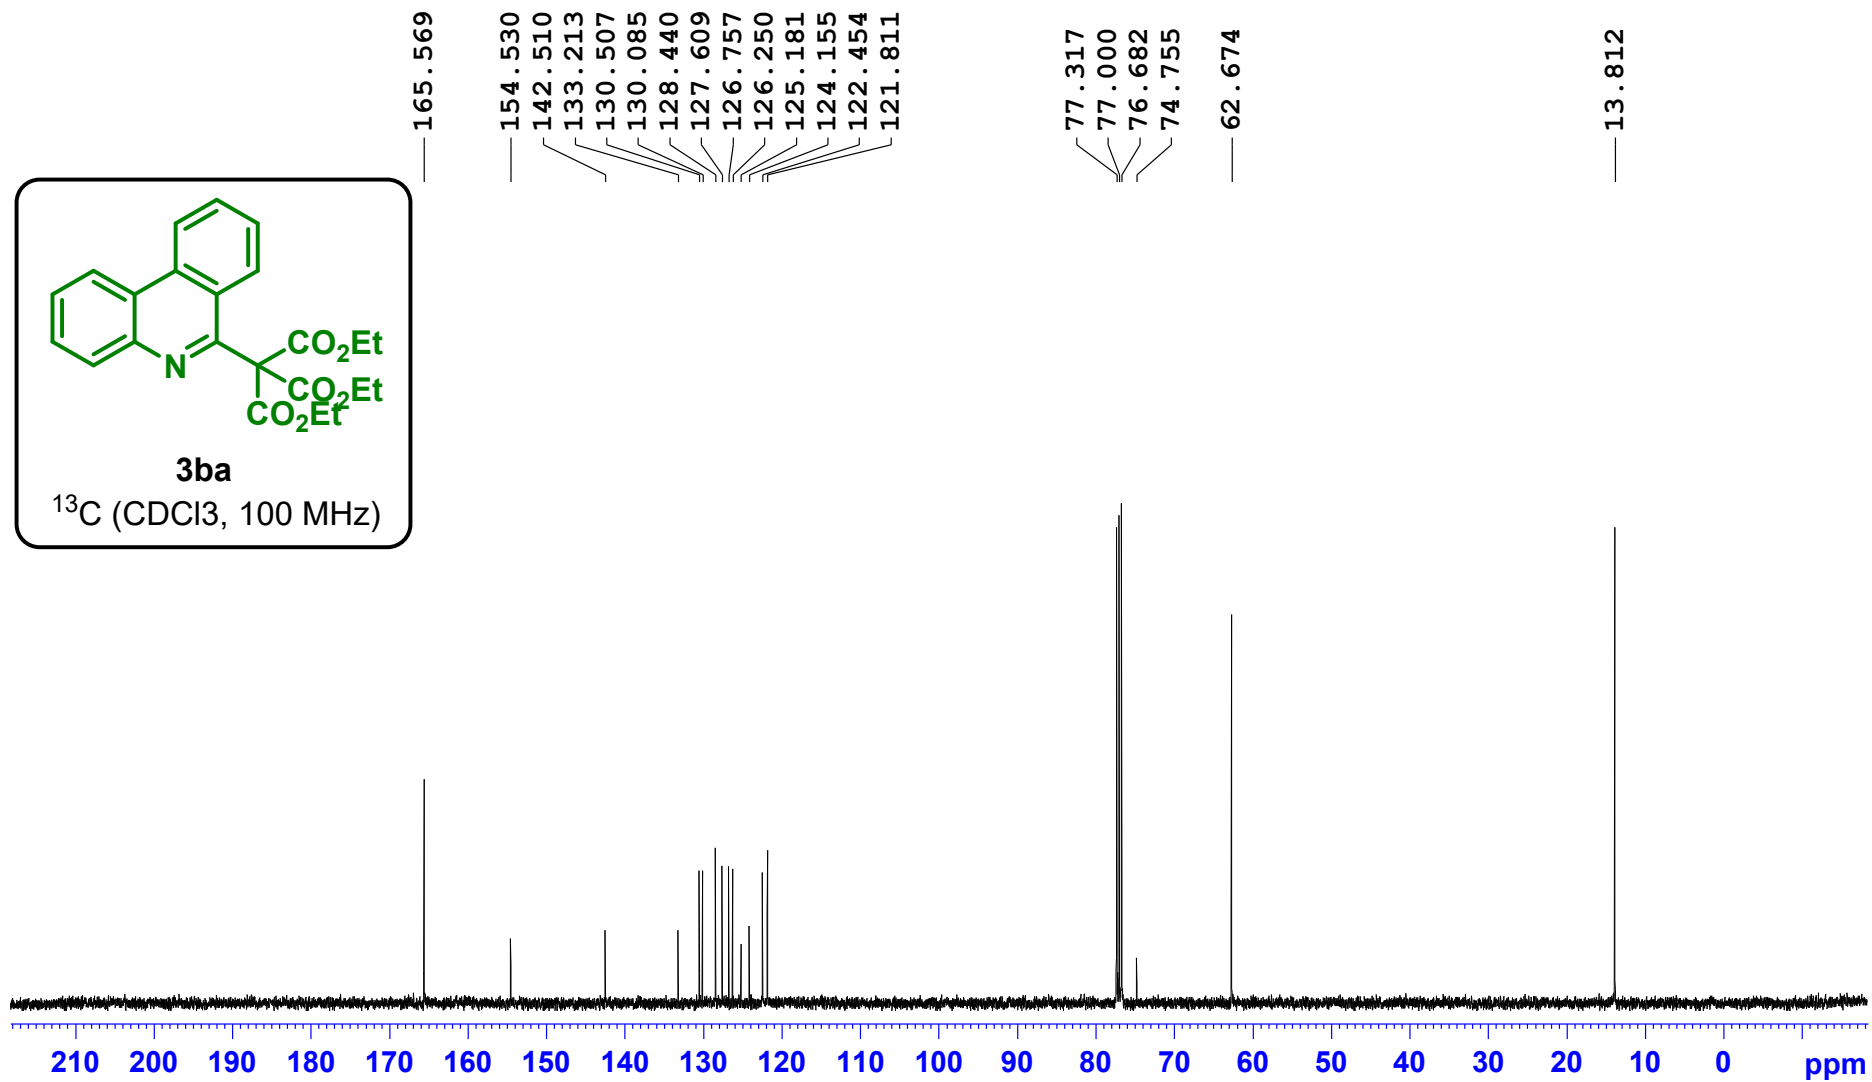

8.914  
8.911  
8.626  
8.606  
8.158  
8.137  
7.918  
7.914  
7.901  
7.898  
7.893  
7.883  
7.881  
7.820  
7.799  
7.717  
7.698  
7.679  
7.284

4.409  
4.391  
4.374  
4.356

1.283  
1.265  
1.248

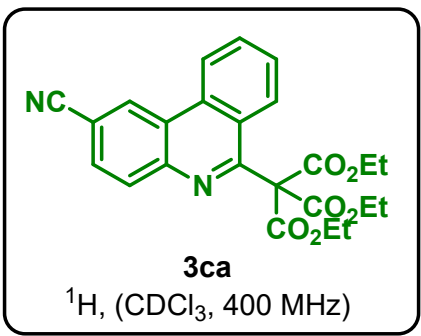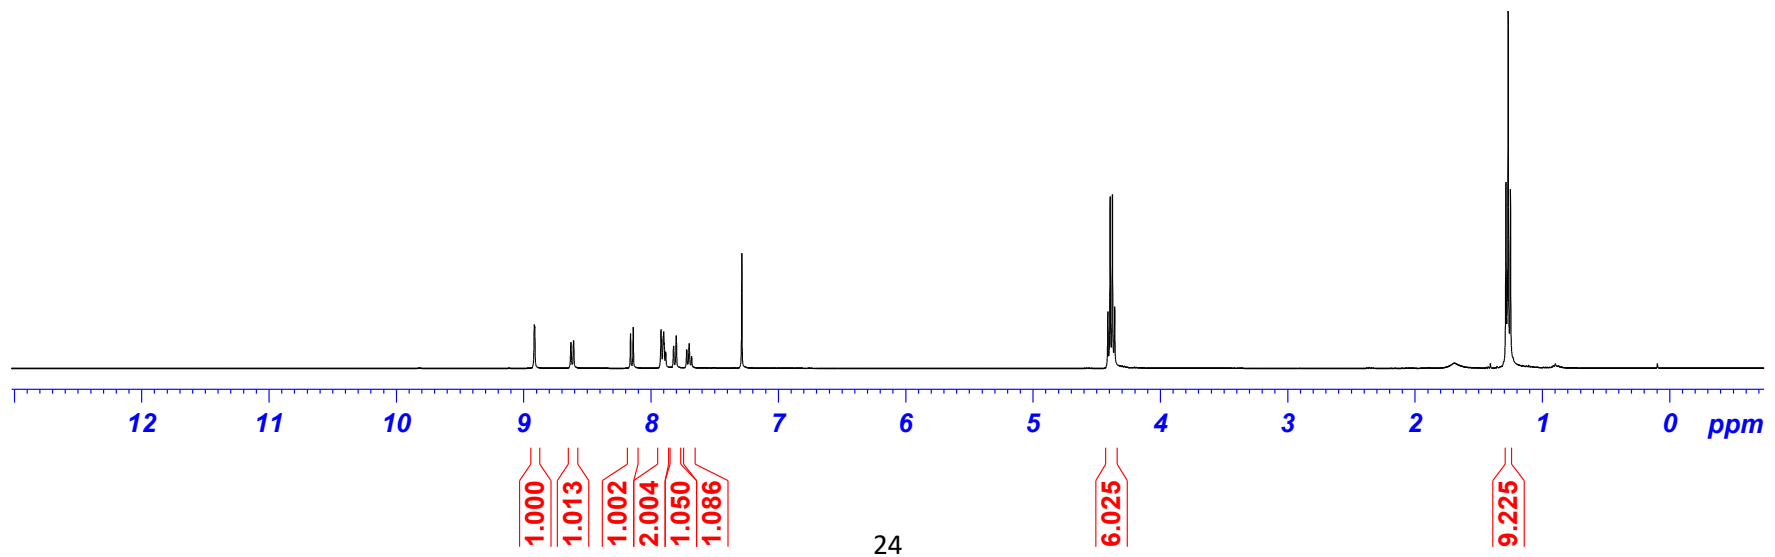



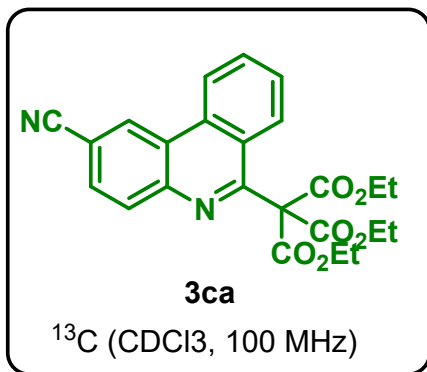

165.120  
157.777  
144.056  
132.110  
131.574  
131.224  
130.111  
128.098  
127.698  
126.651  
125.577  
124.390  
122.417  
118.898  
111.035

77.318  
77.000  
76.682  
74.760  
62.933

13.800

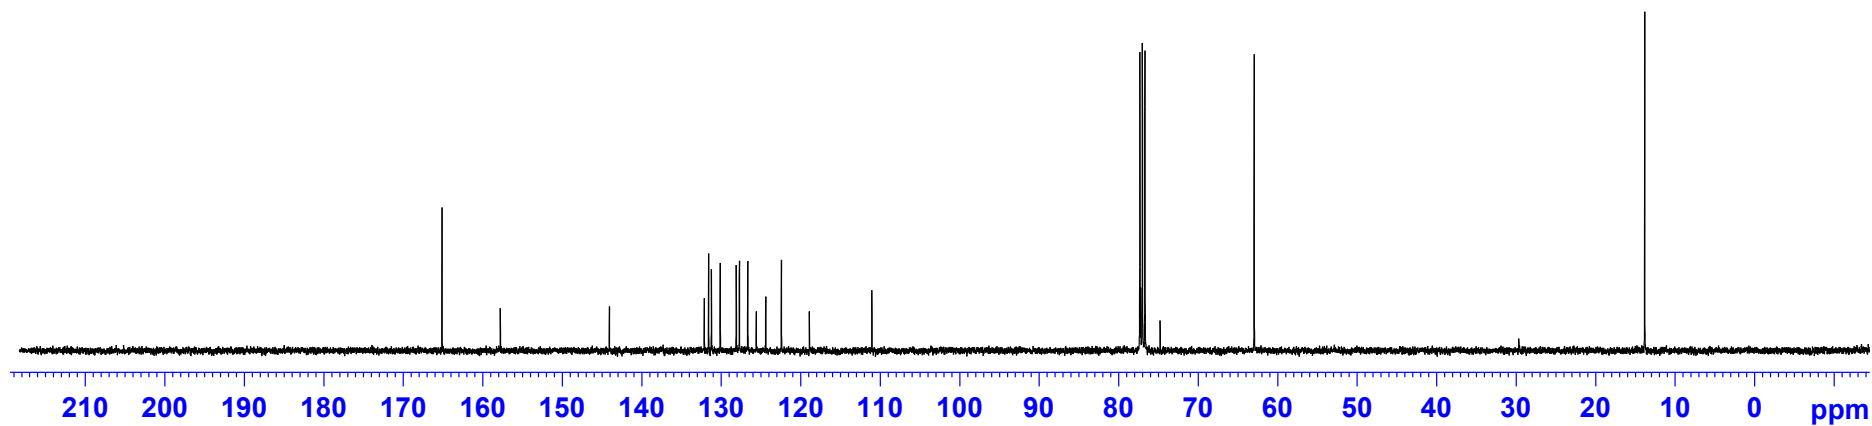

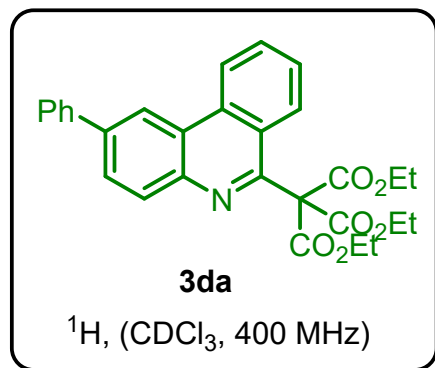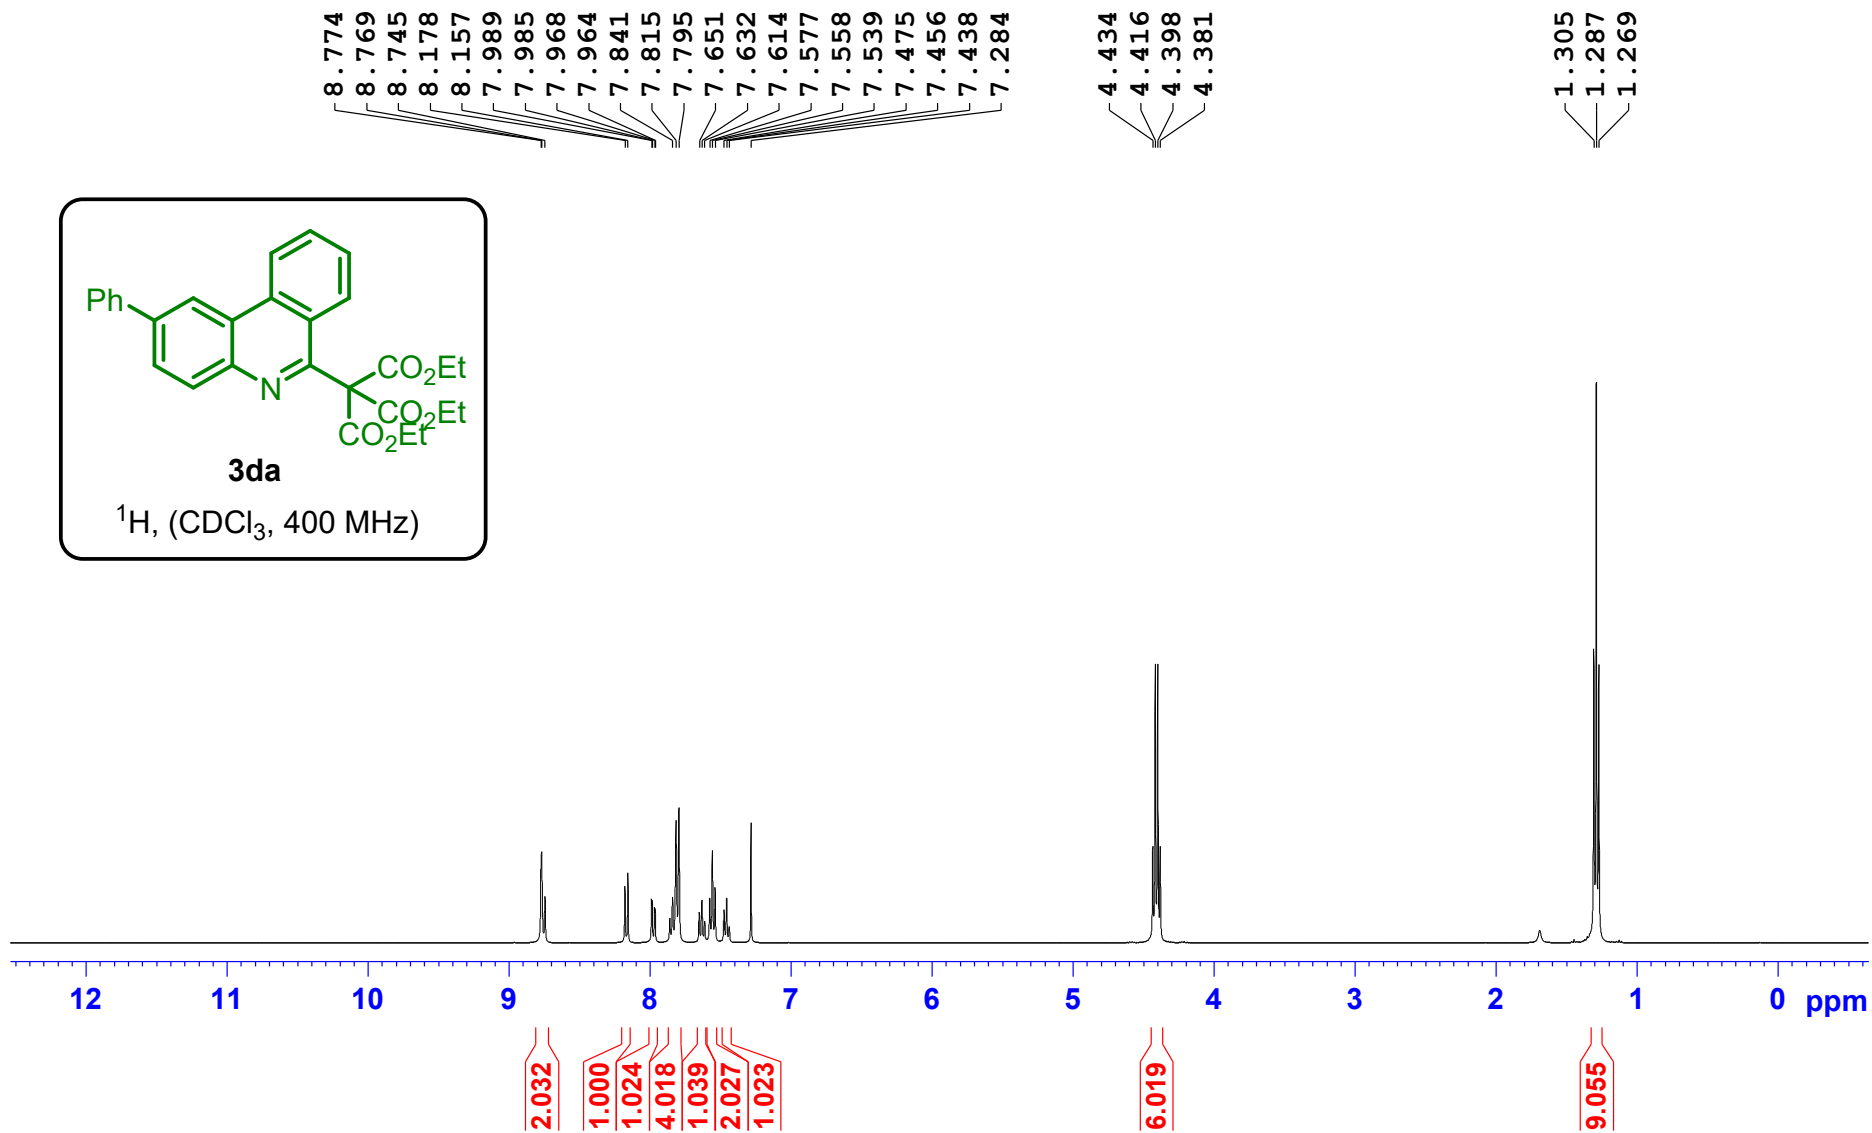

165.565  
154.451  
141.859  
140.881  
140.465  
133.248  
130.869  
130.116  
128.923  
127.860  
127.673  
127.564  
126.884  
126.327  
125.390  
124.307  
122.459  
120.164

77.318  
77.000  
76.682  
74.749  
62.685

13.821

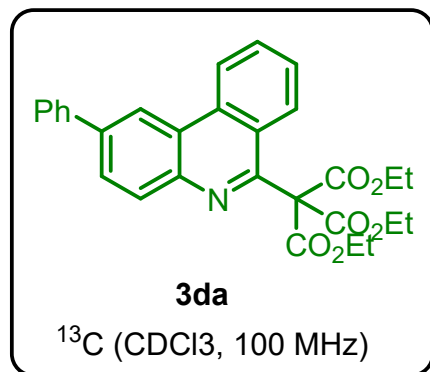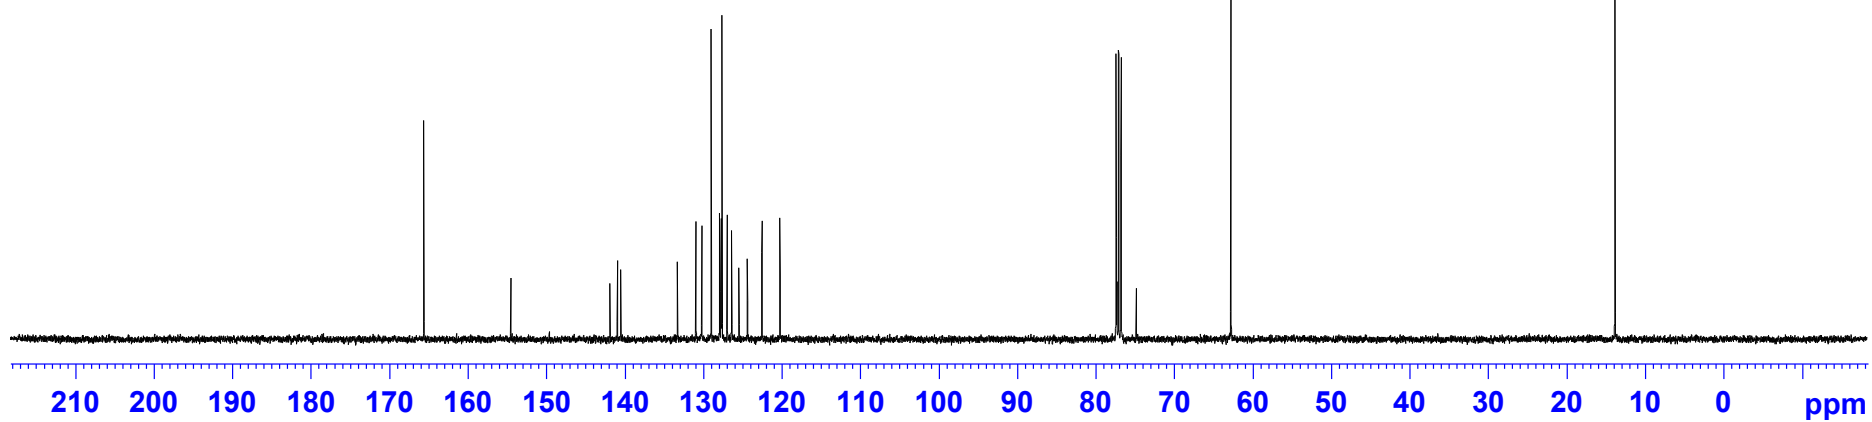

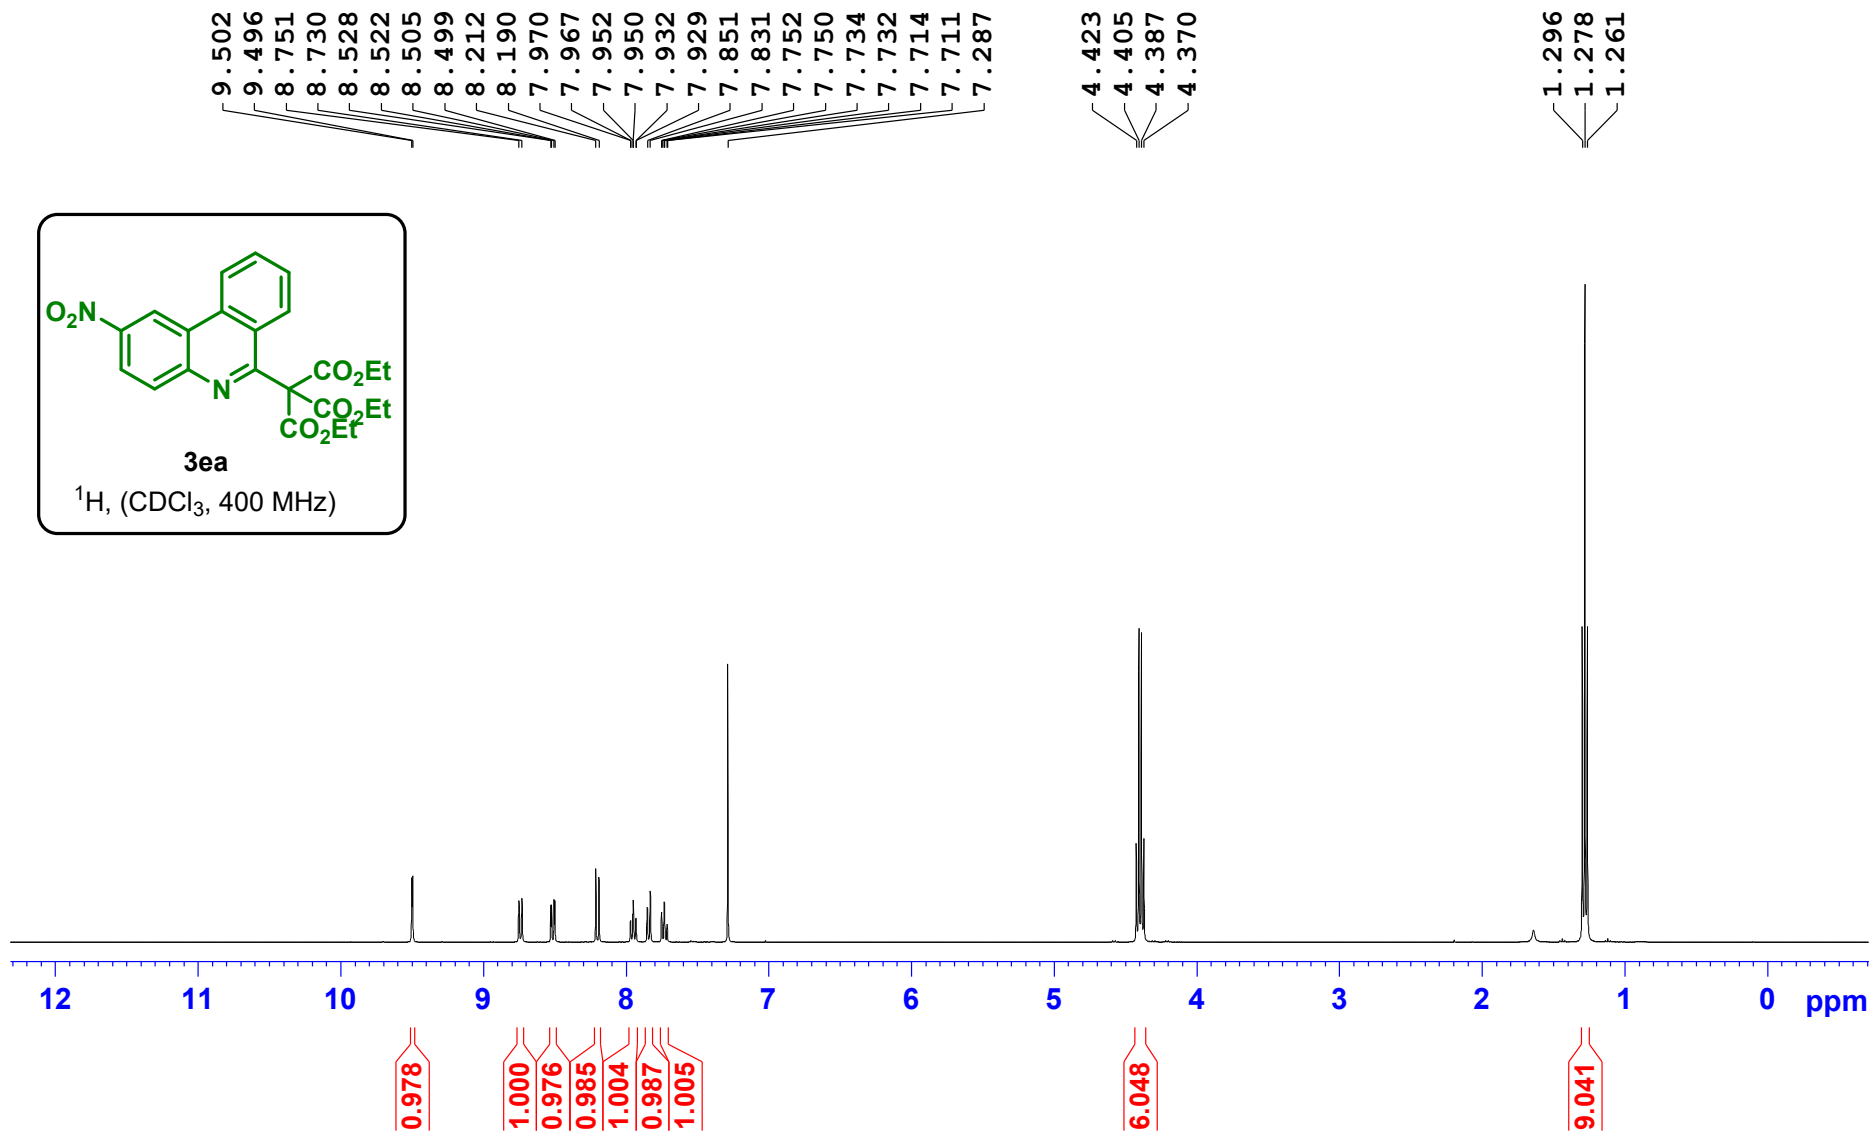

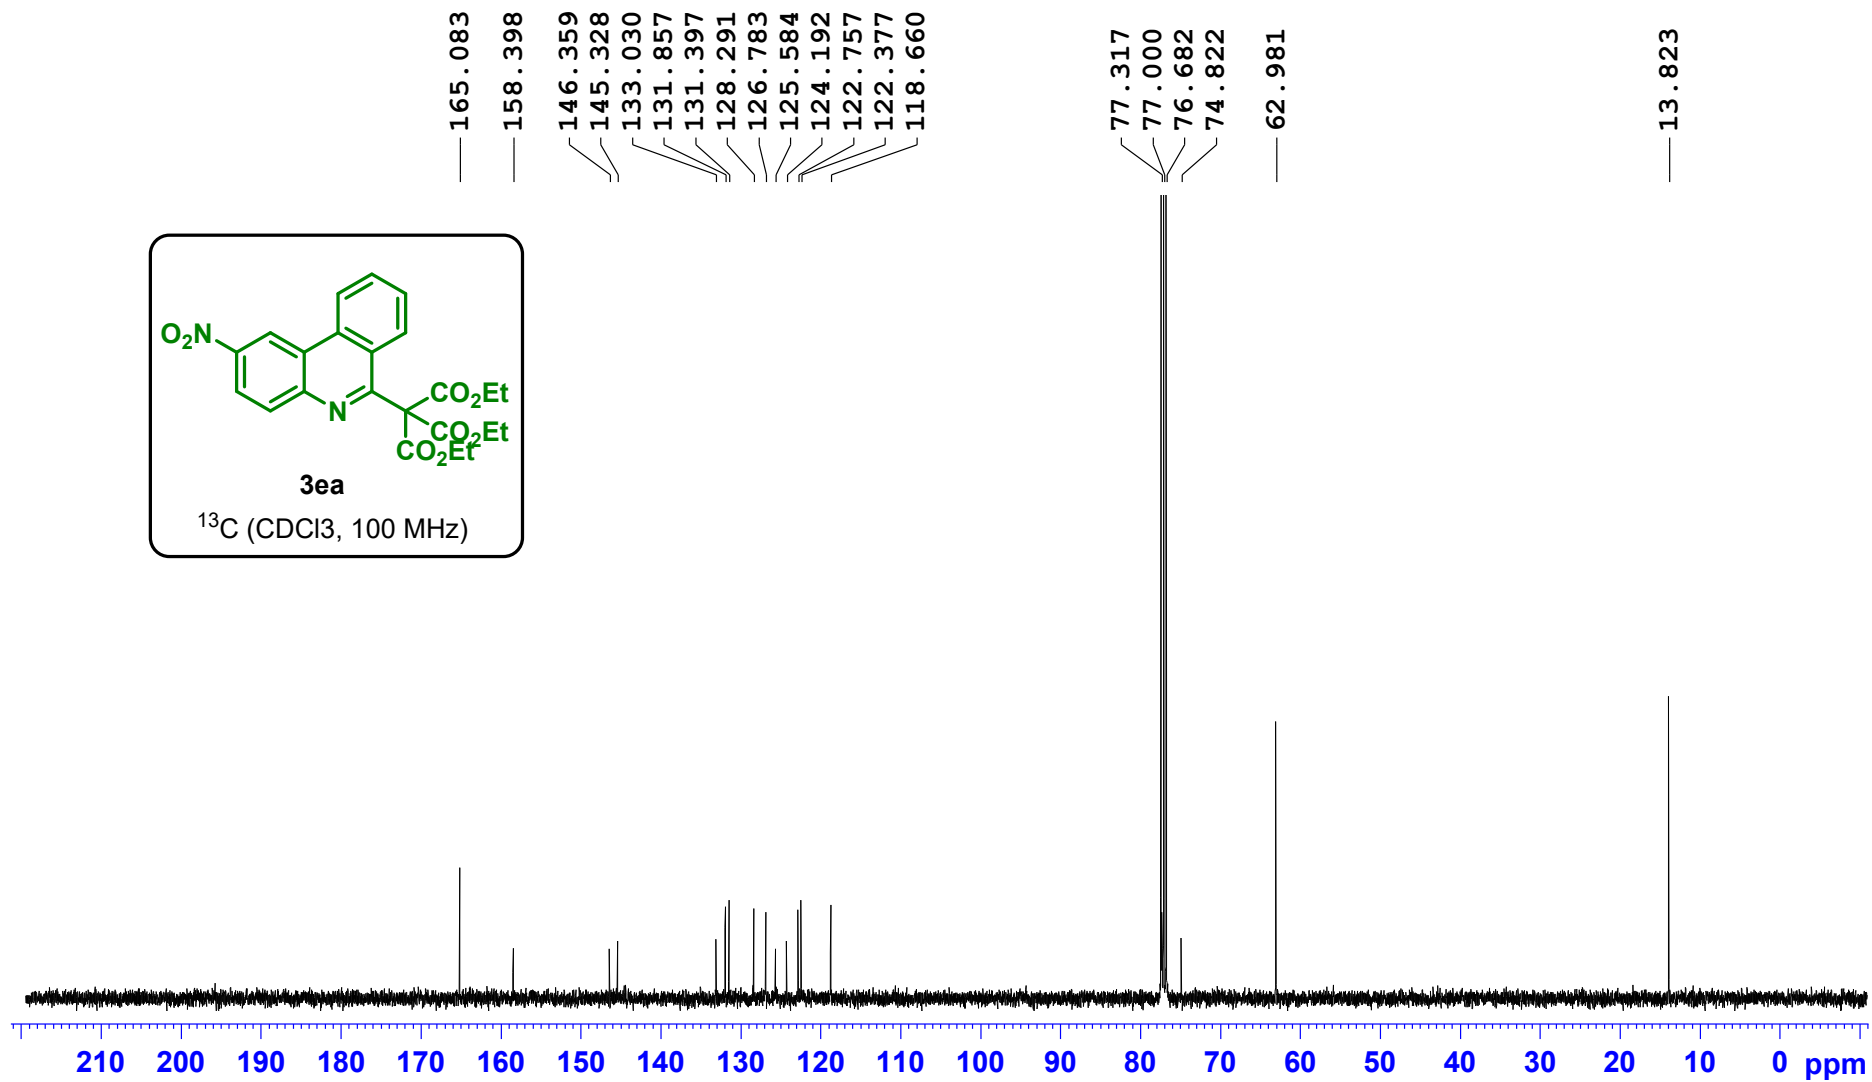

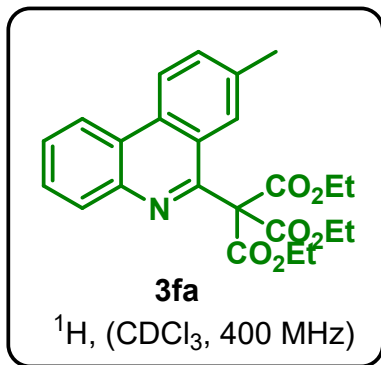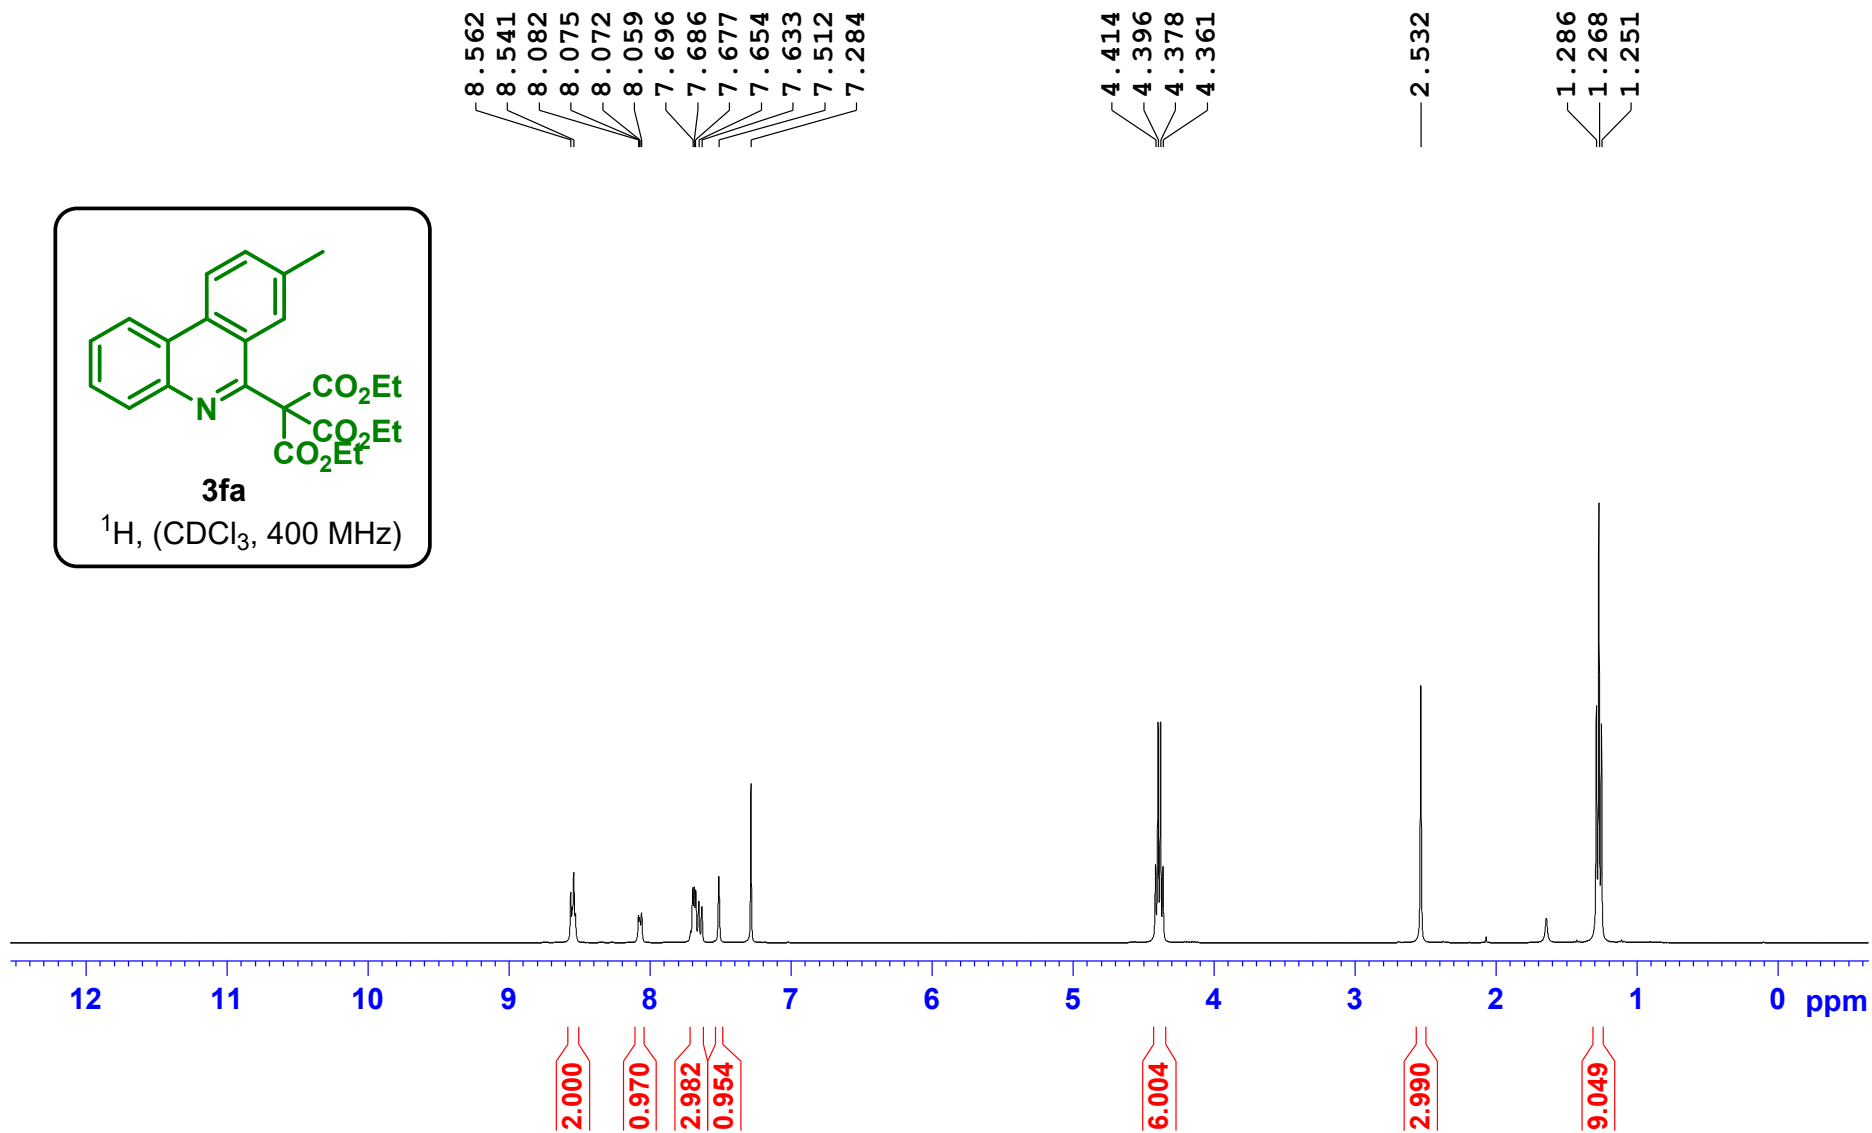

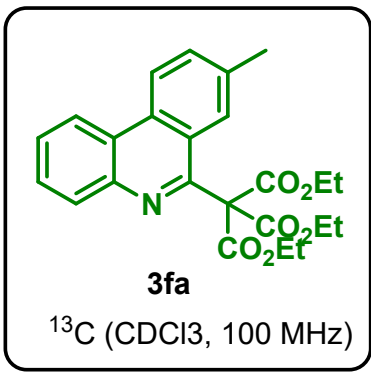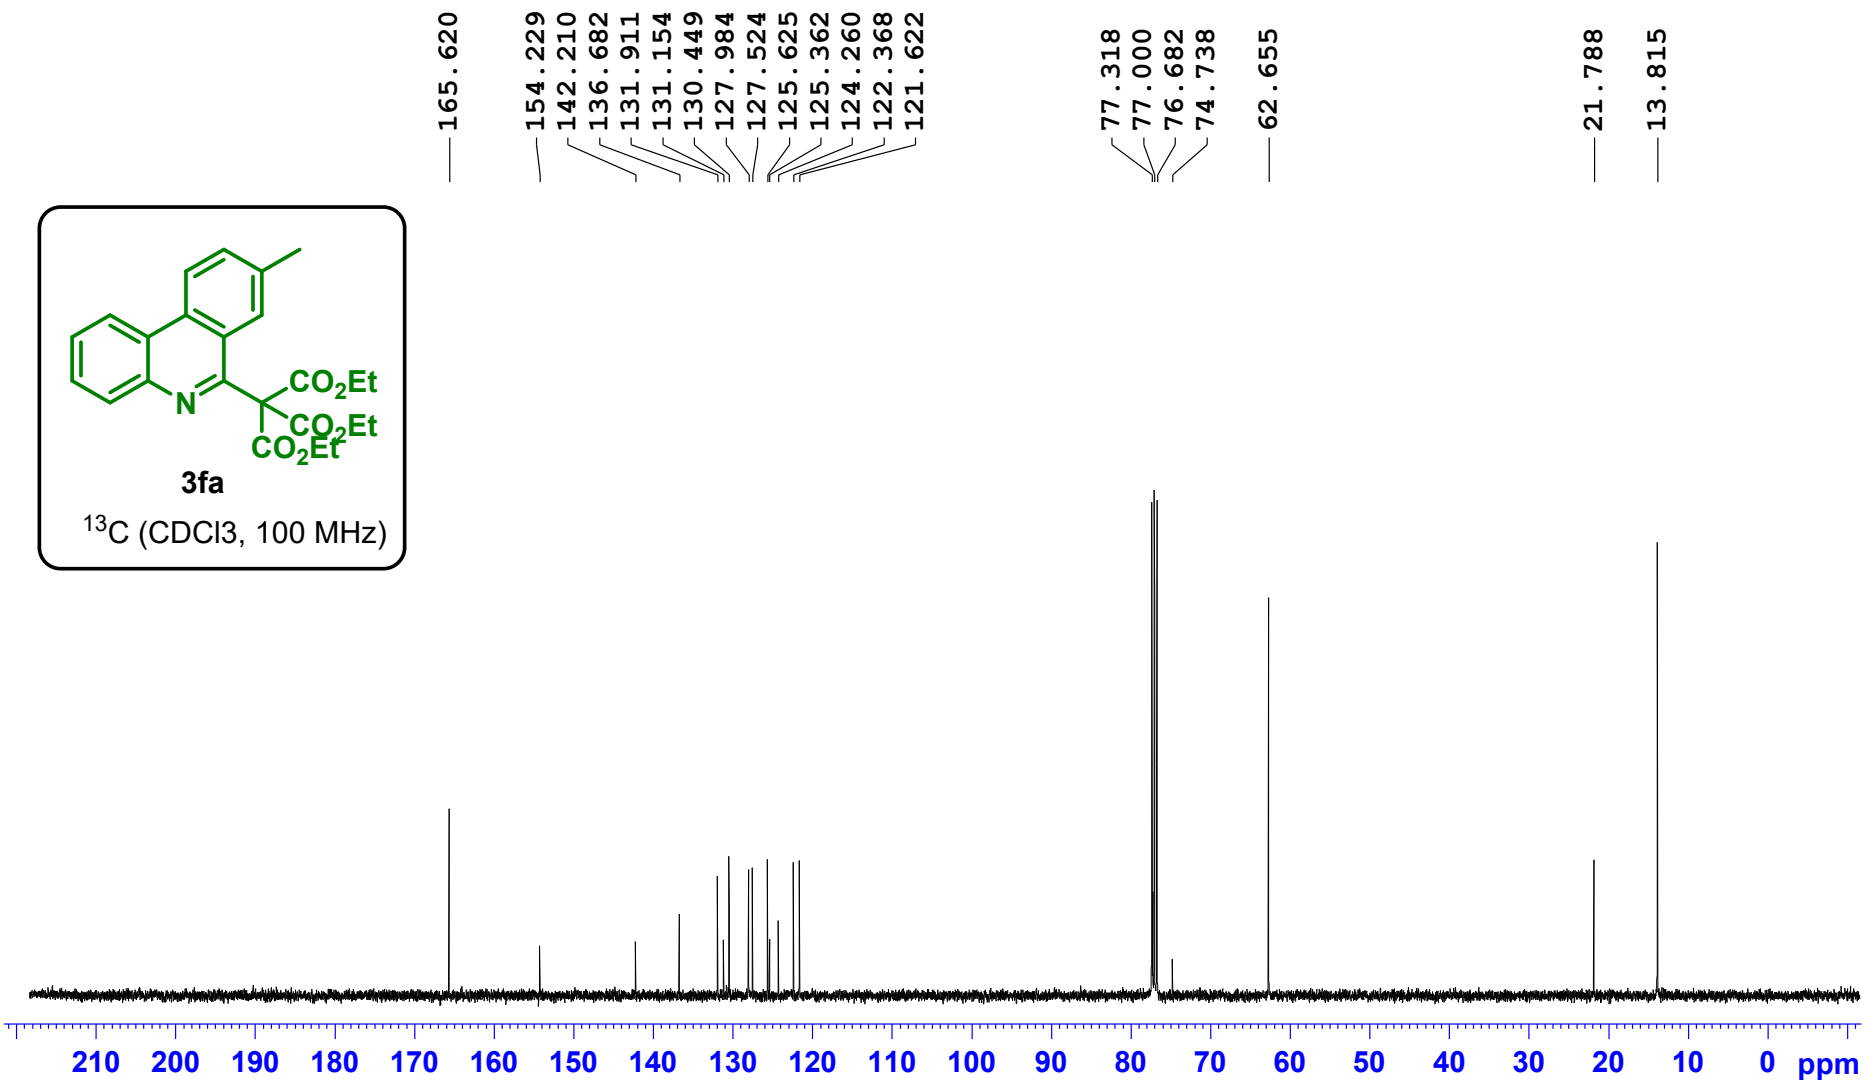

8.585  
8.562  
8.508  
8.498  
8.485  
8.079  
8.074  
8.065  
8.062  
8.055  
7.681  
7.672  
7.662  
7.473  
7.467  
7.450  
7.444  
7.284  
7.099

4.409  
4.392  
4.374  
4.356  
3.871

1.293  
1.275  
1.257

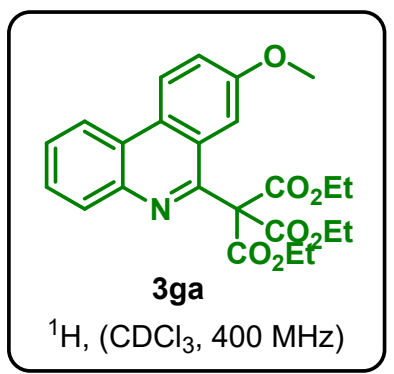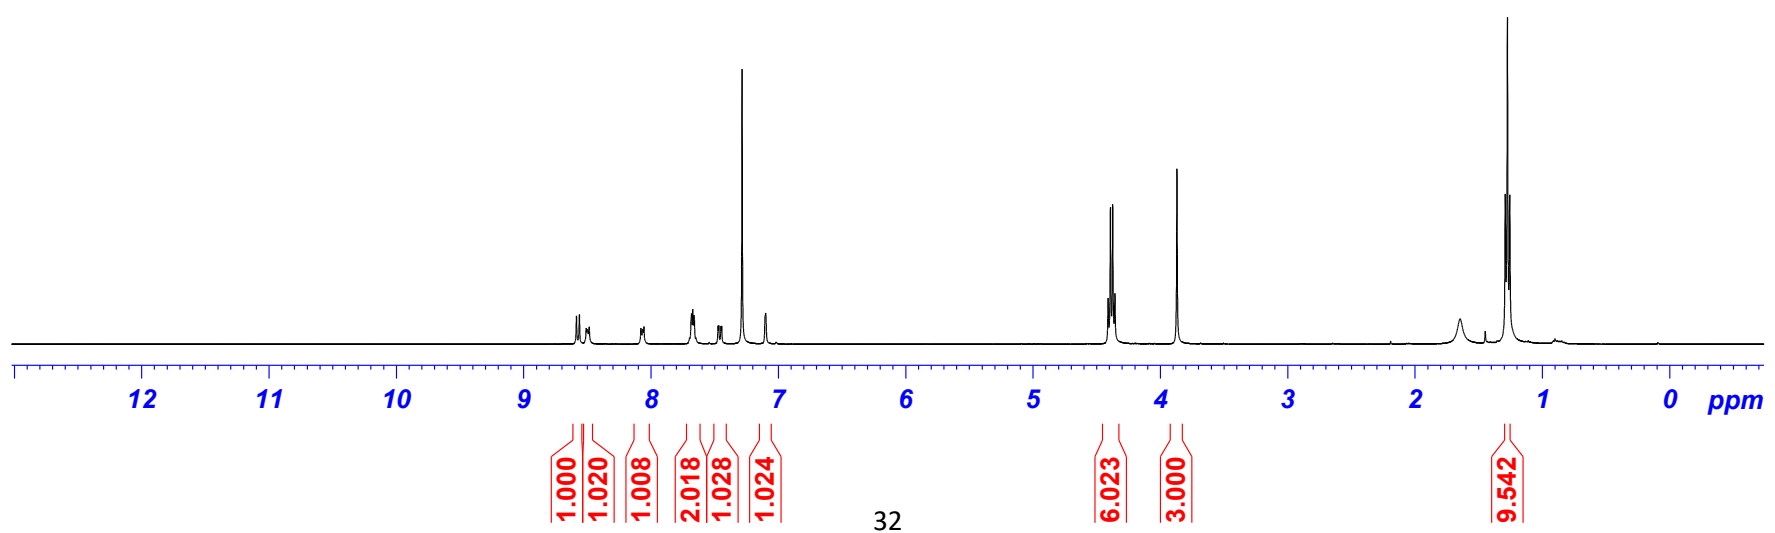



165.588  
158.060  
153.593  
141.727  
130.440  
127.647  
127.442  
126.415  
124.232  
124.047  
121.305  
120.988  
106.274

77.318  
77.000  
76.682  
74.878  
62.656  
55.310

13.863

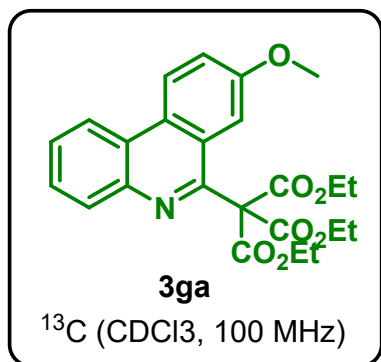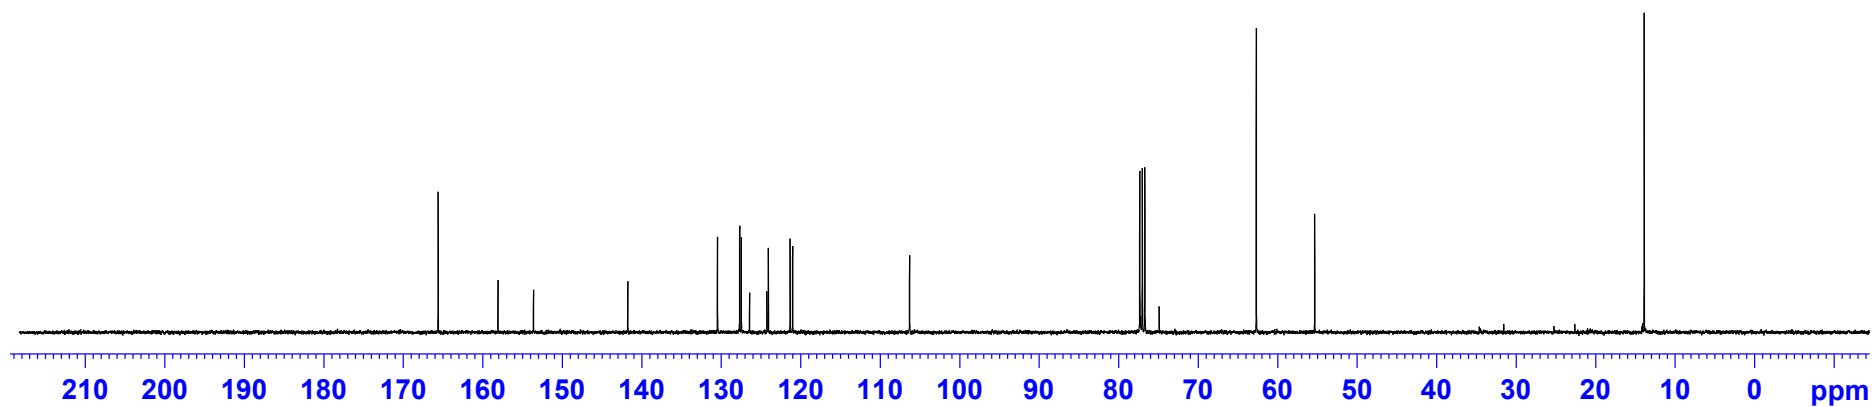

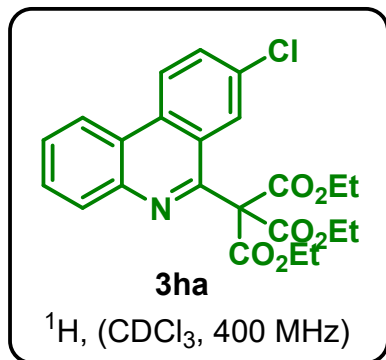

8.580  
 8.557  
 8.504  
 8.485  
 8.089  
 8.069  
 7.754  
 7.734  
 7.713  
 7.692  
 7.675  
 7.283

4.442  
 4.425  
 4.407  
 4.389

1.322  
 1.304  
 1.286

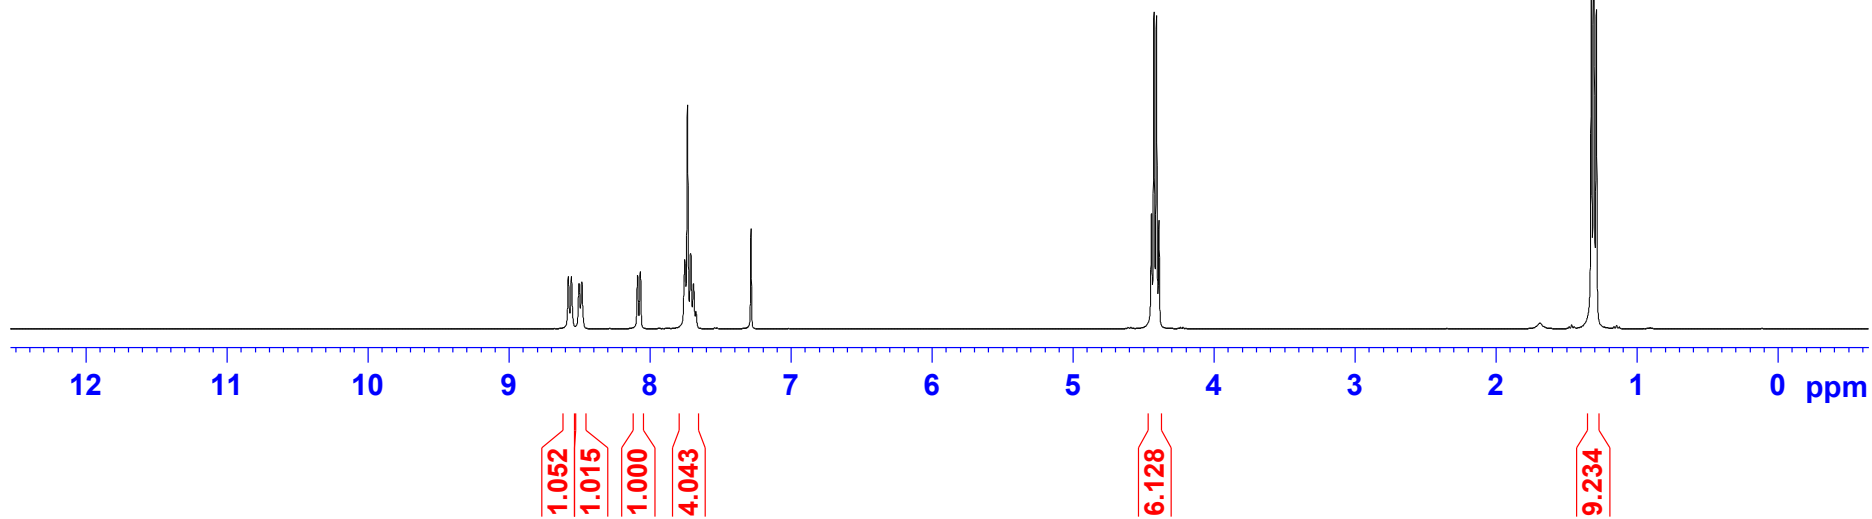

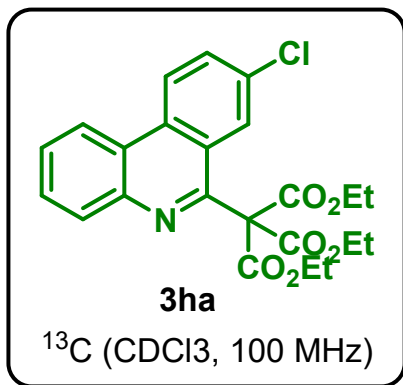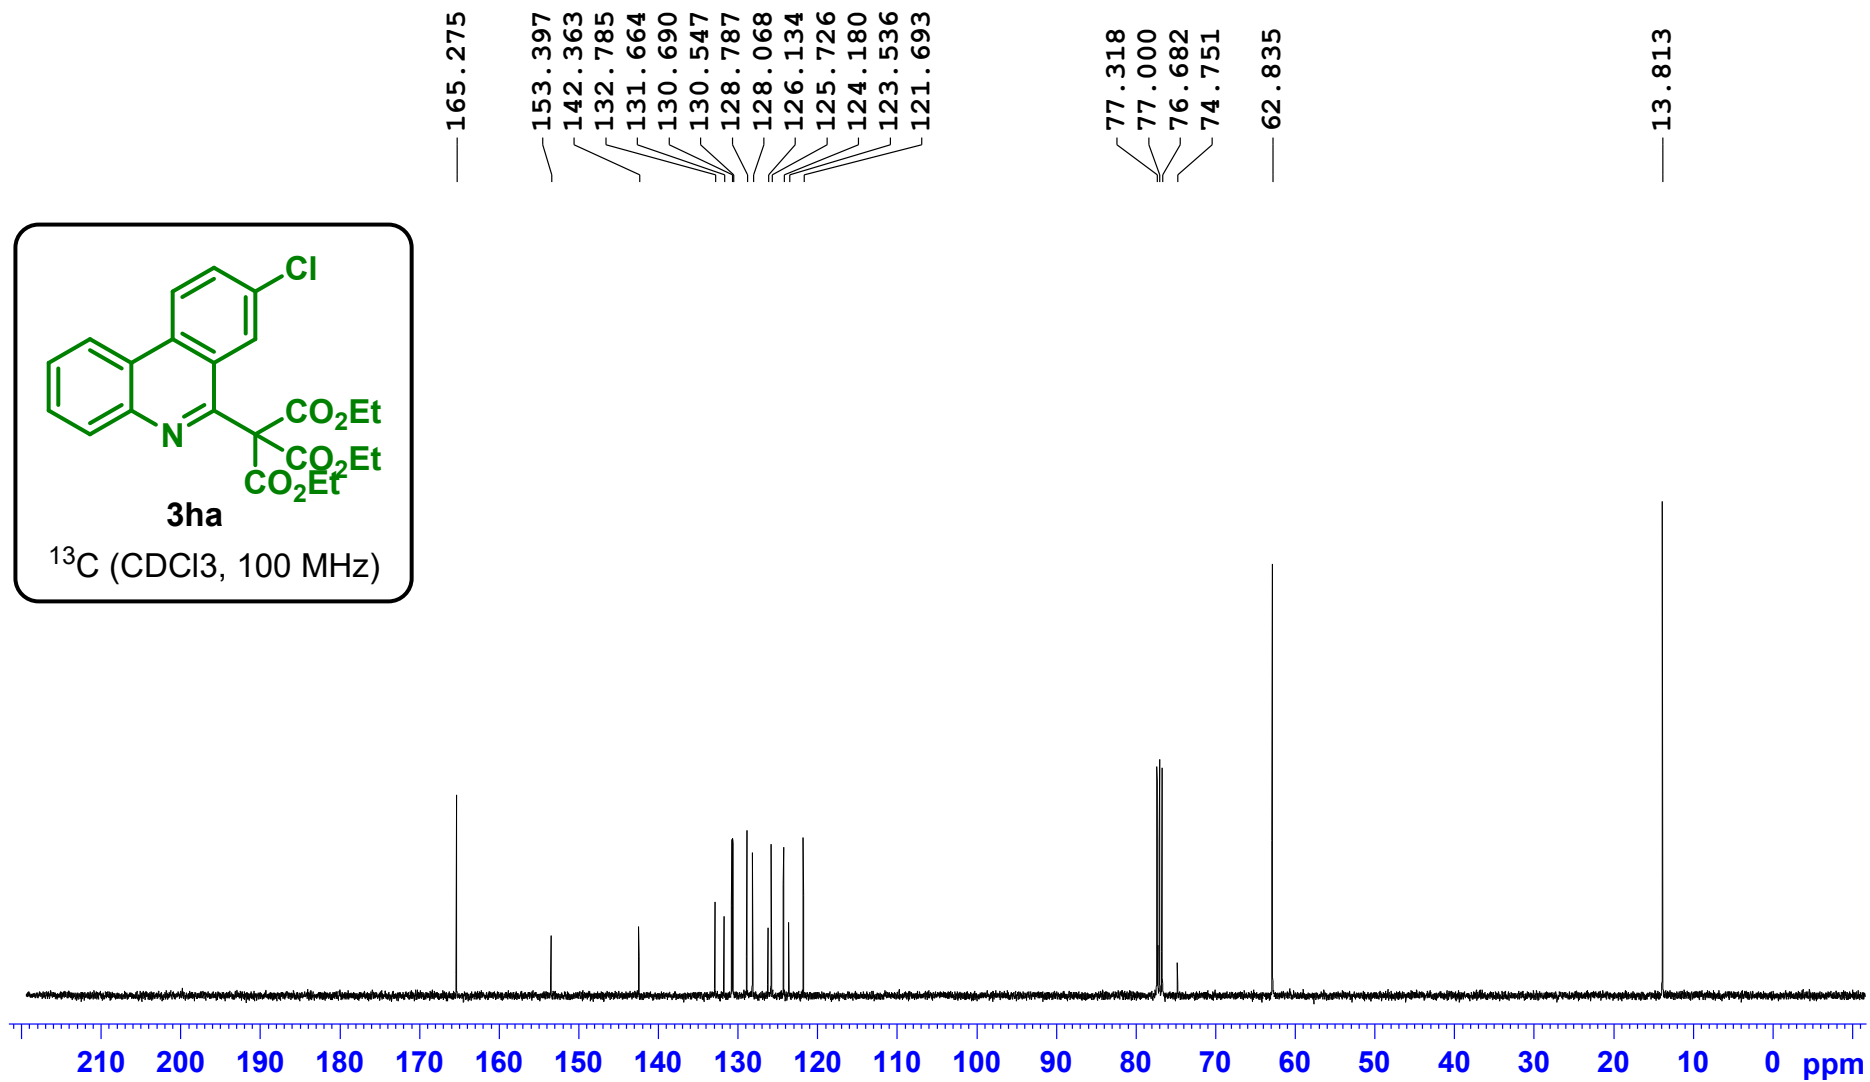

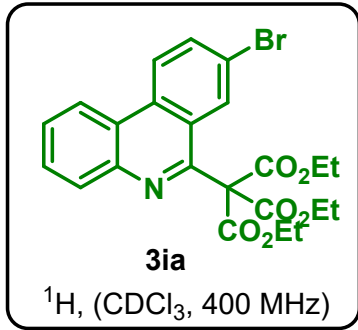

8.510  
8.489  
8.085  
8.065  
7.891  
7.868  
7.756  
7.739  
7.719  
7.715  
7.712  
7.692  
7.674  
7.284

4.442  
4.425  
4.407  
4.389

1.324  
1.307  
1.289

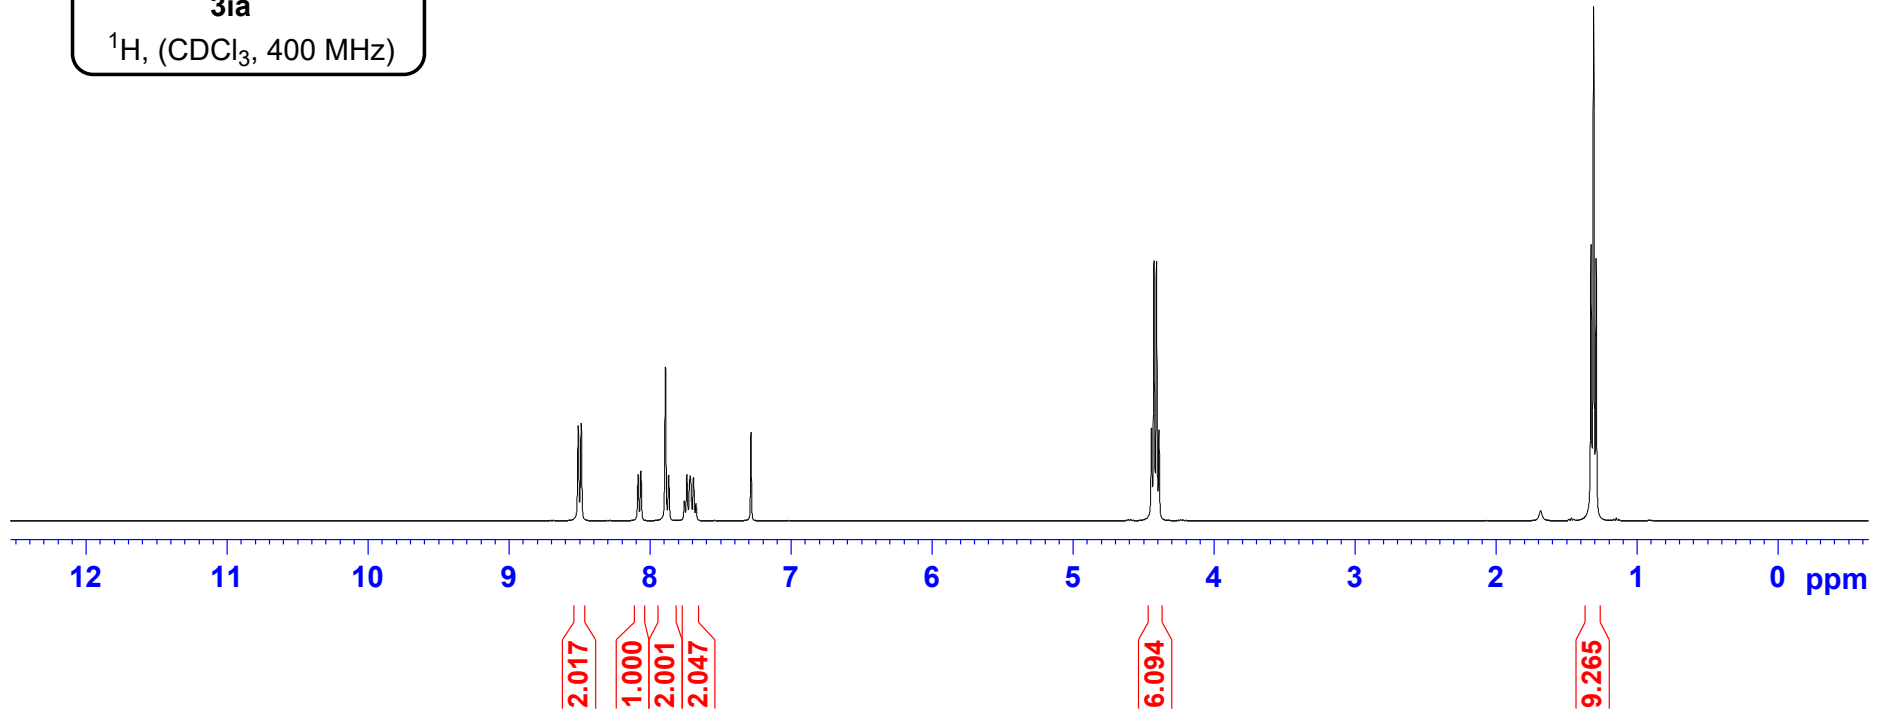

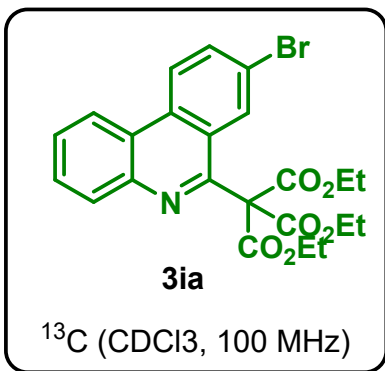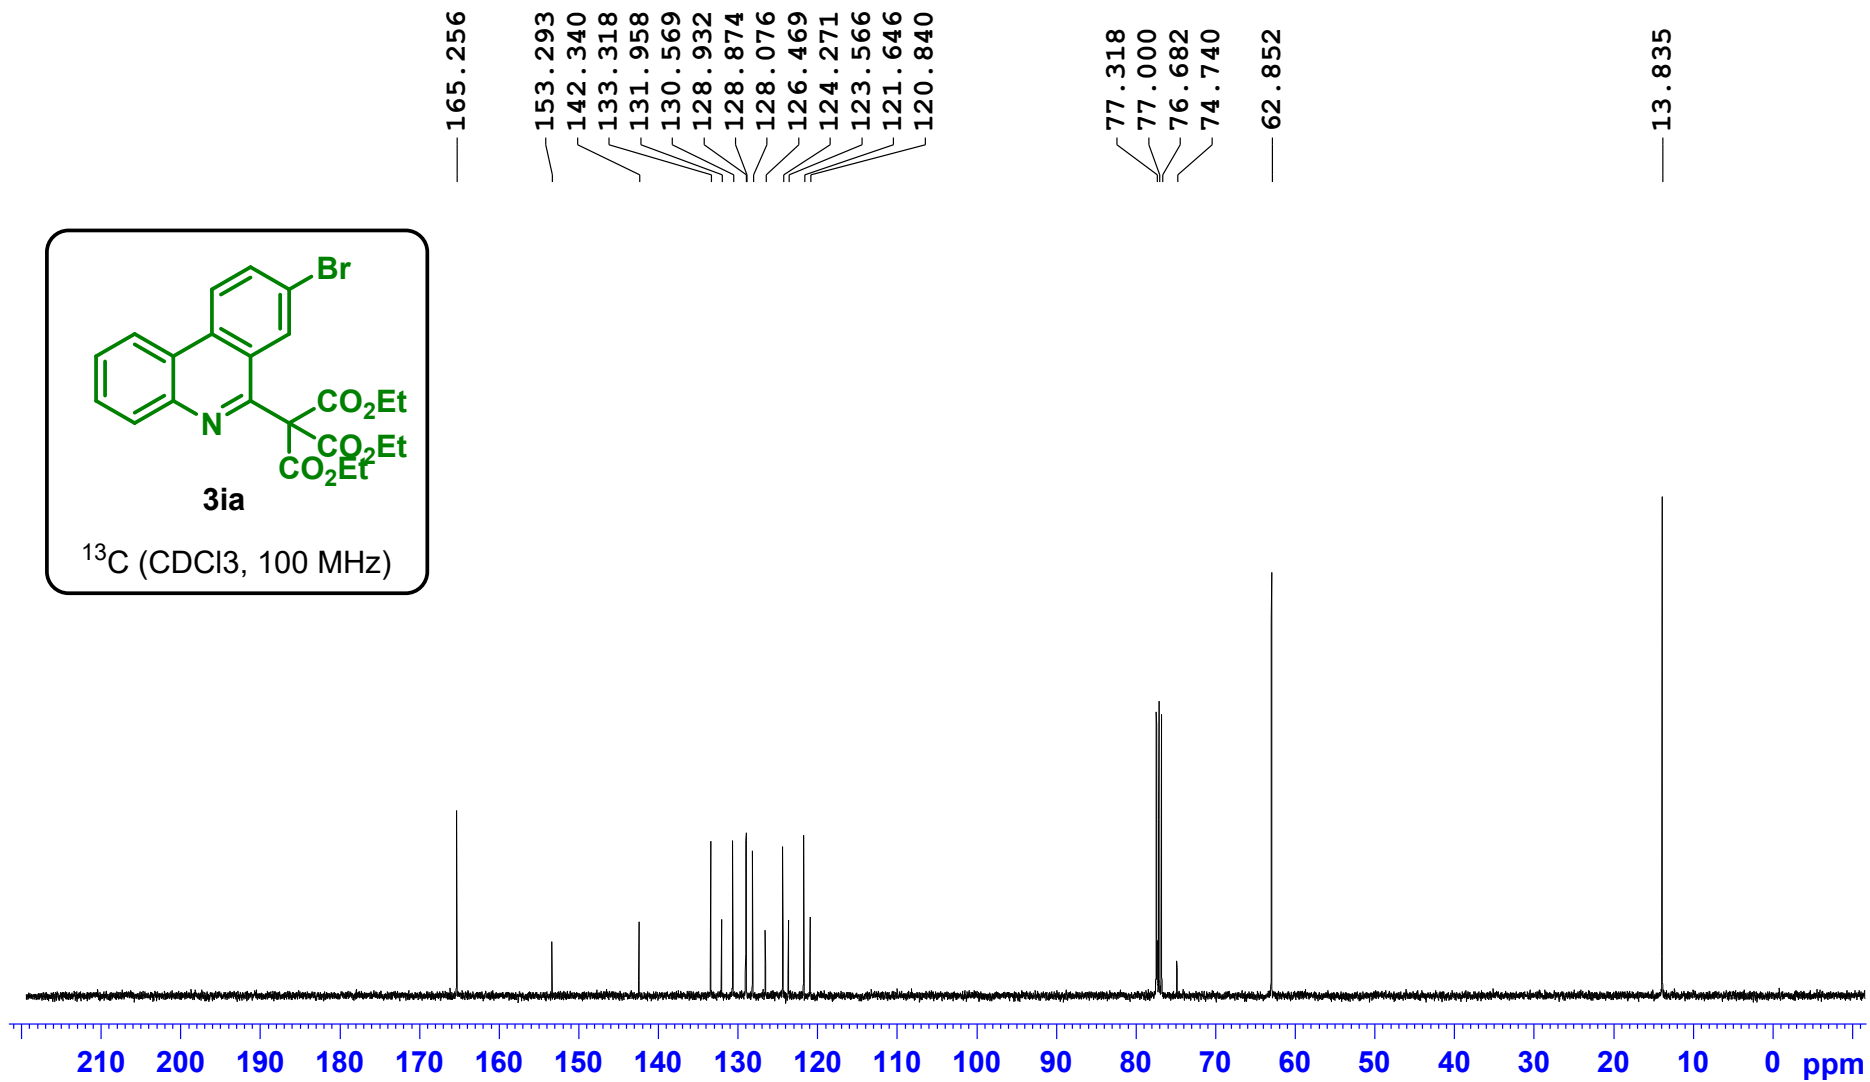

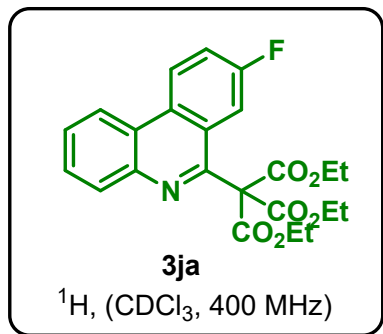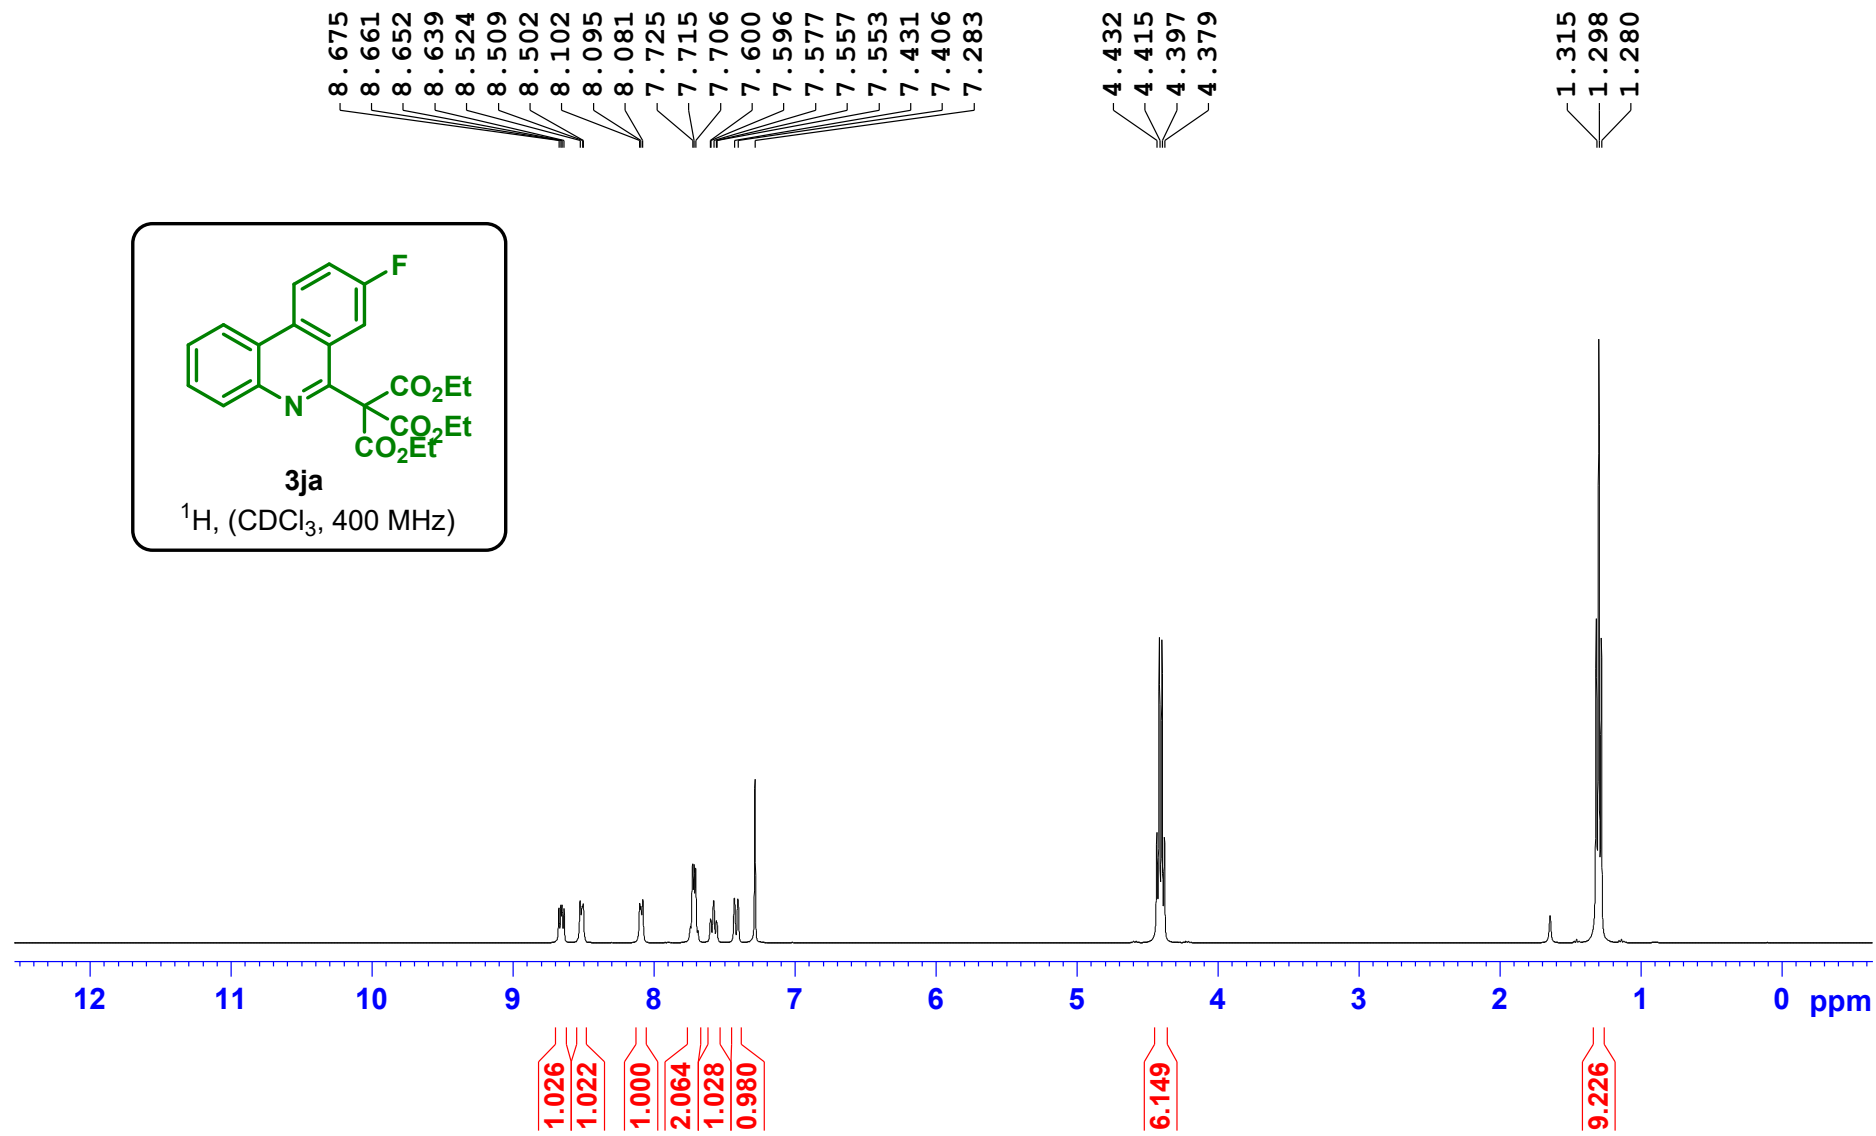

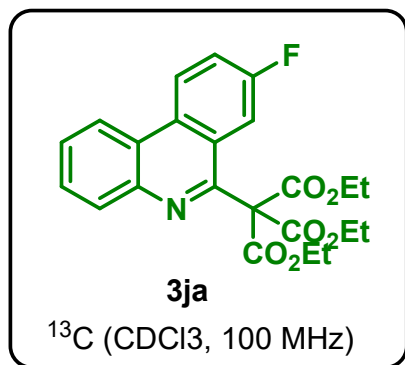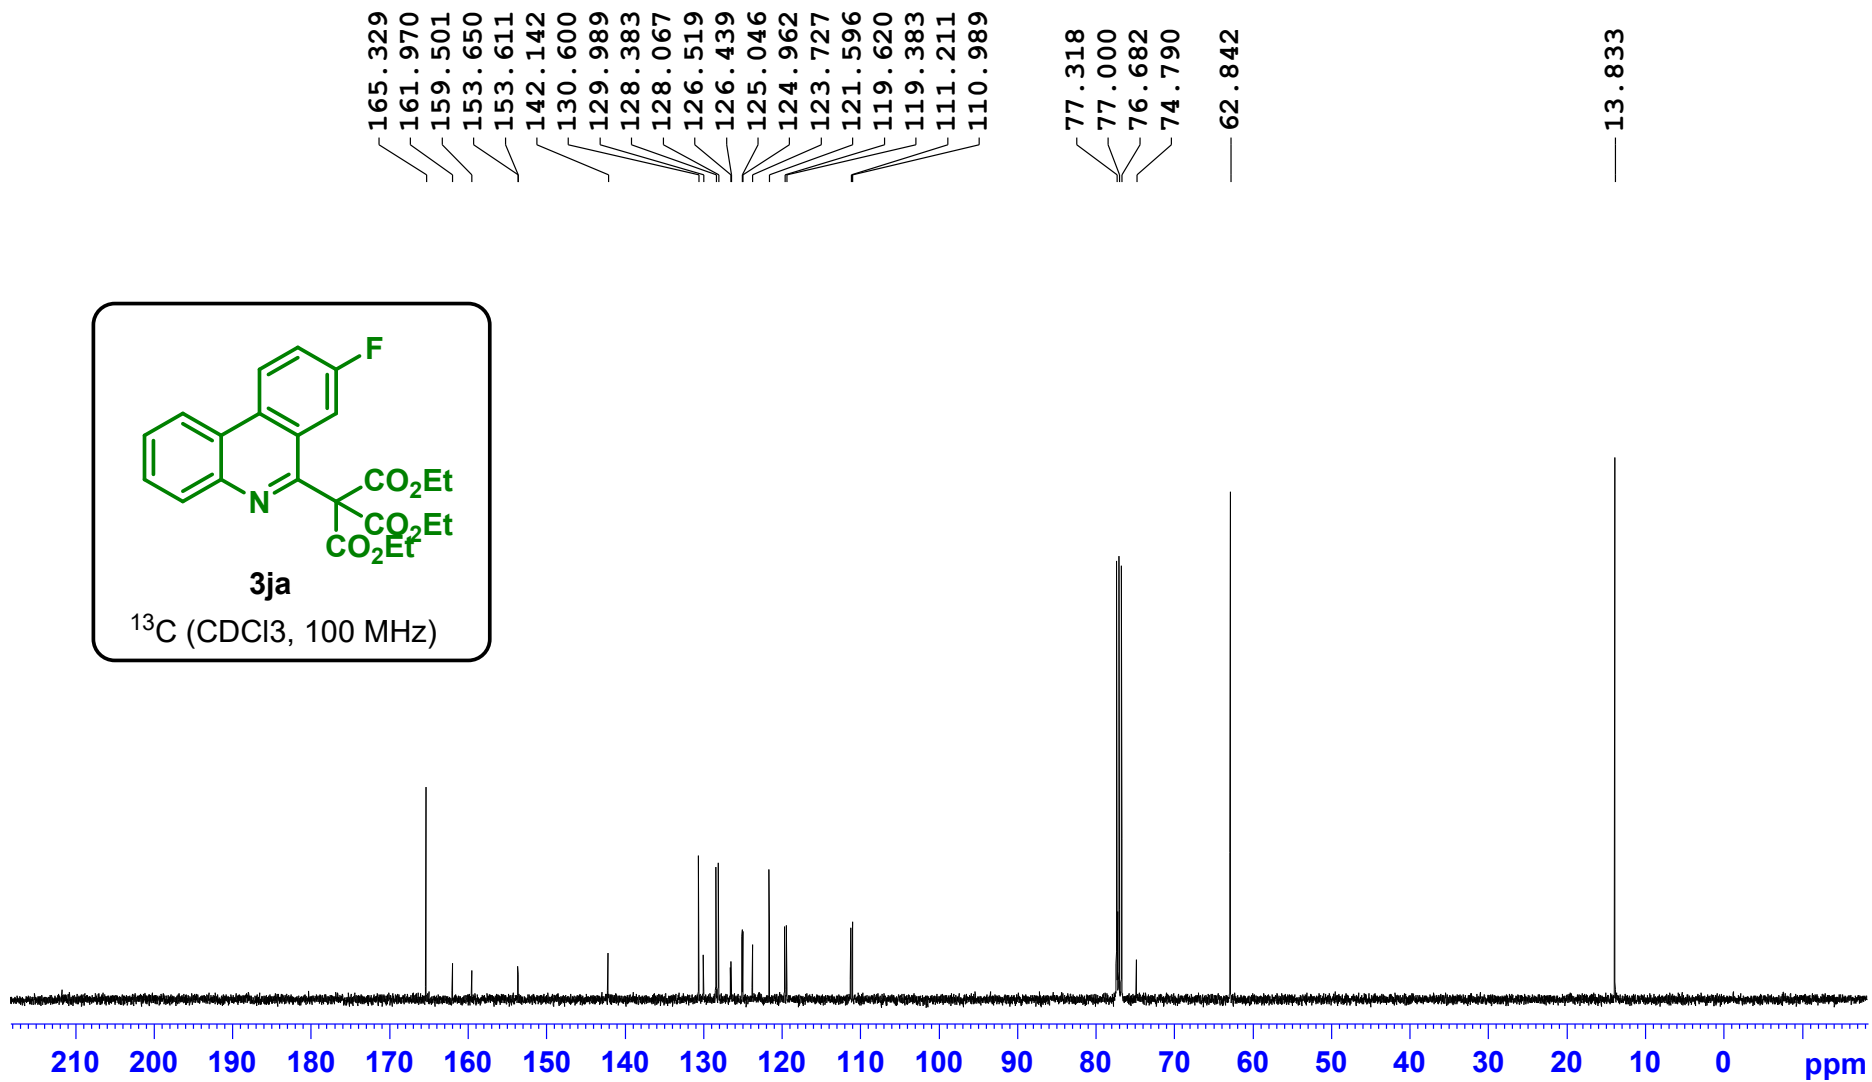

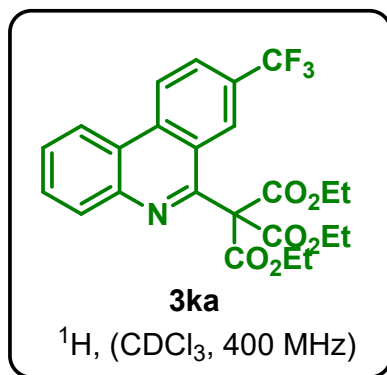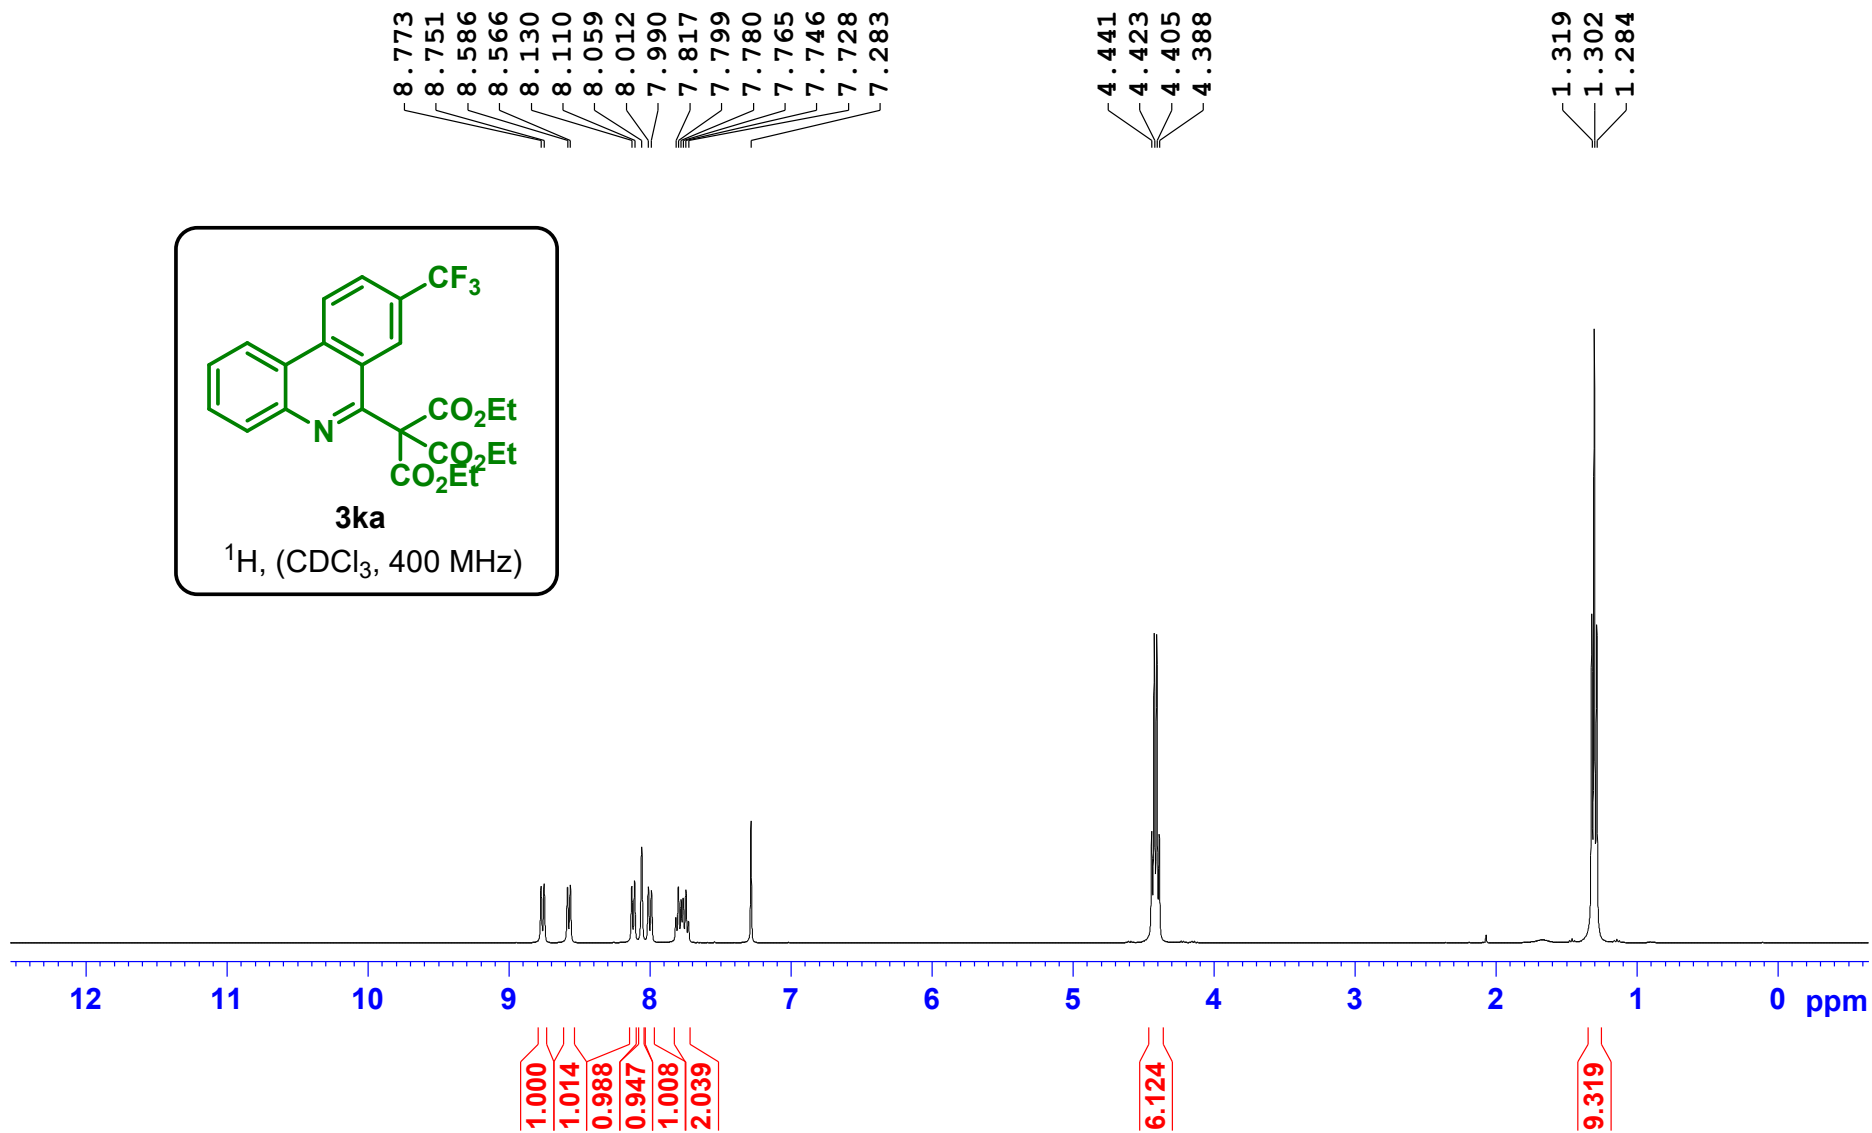



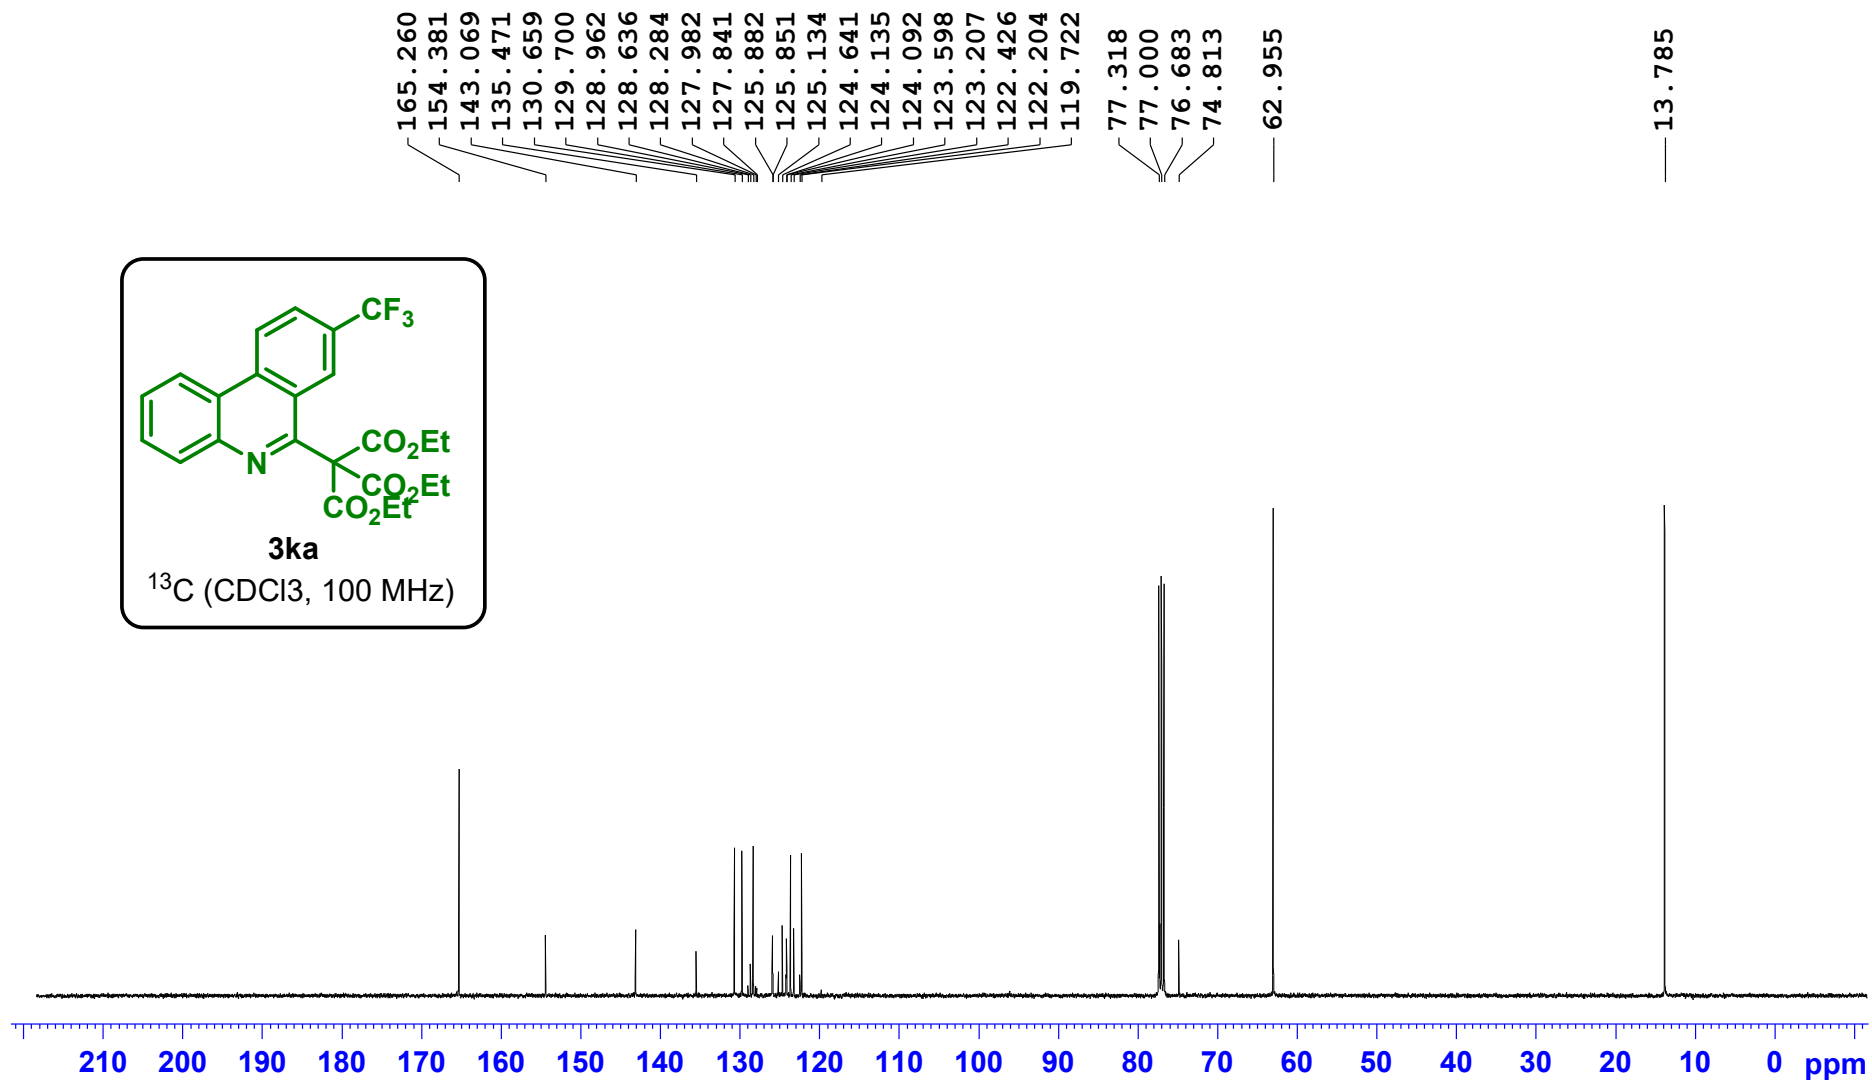

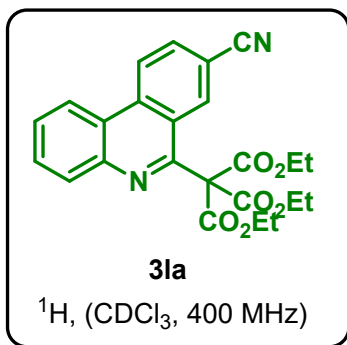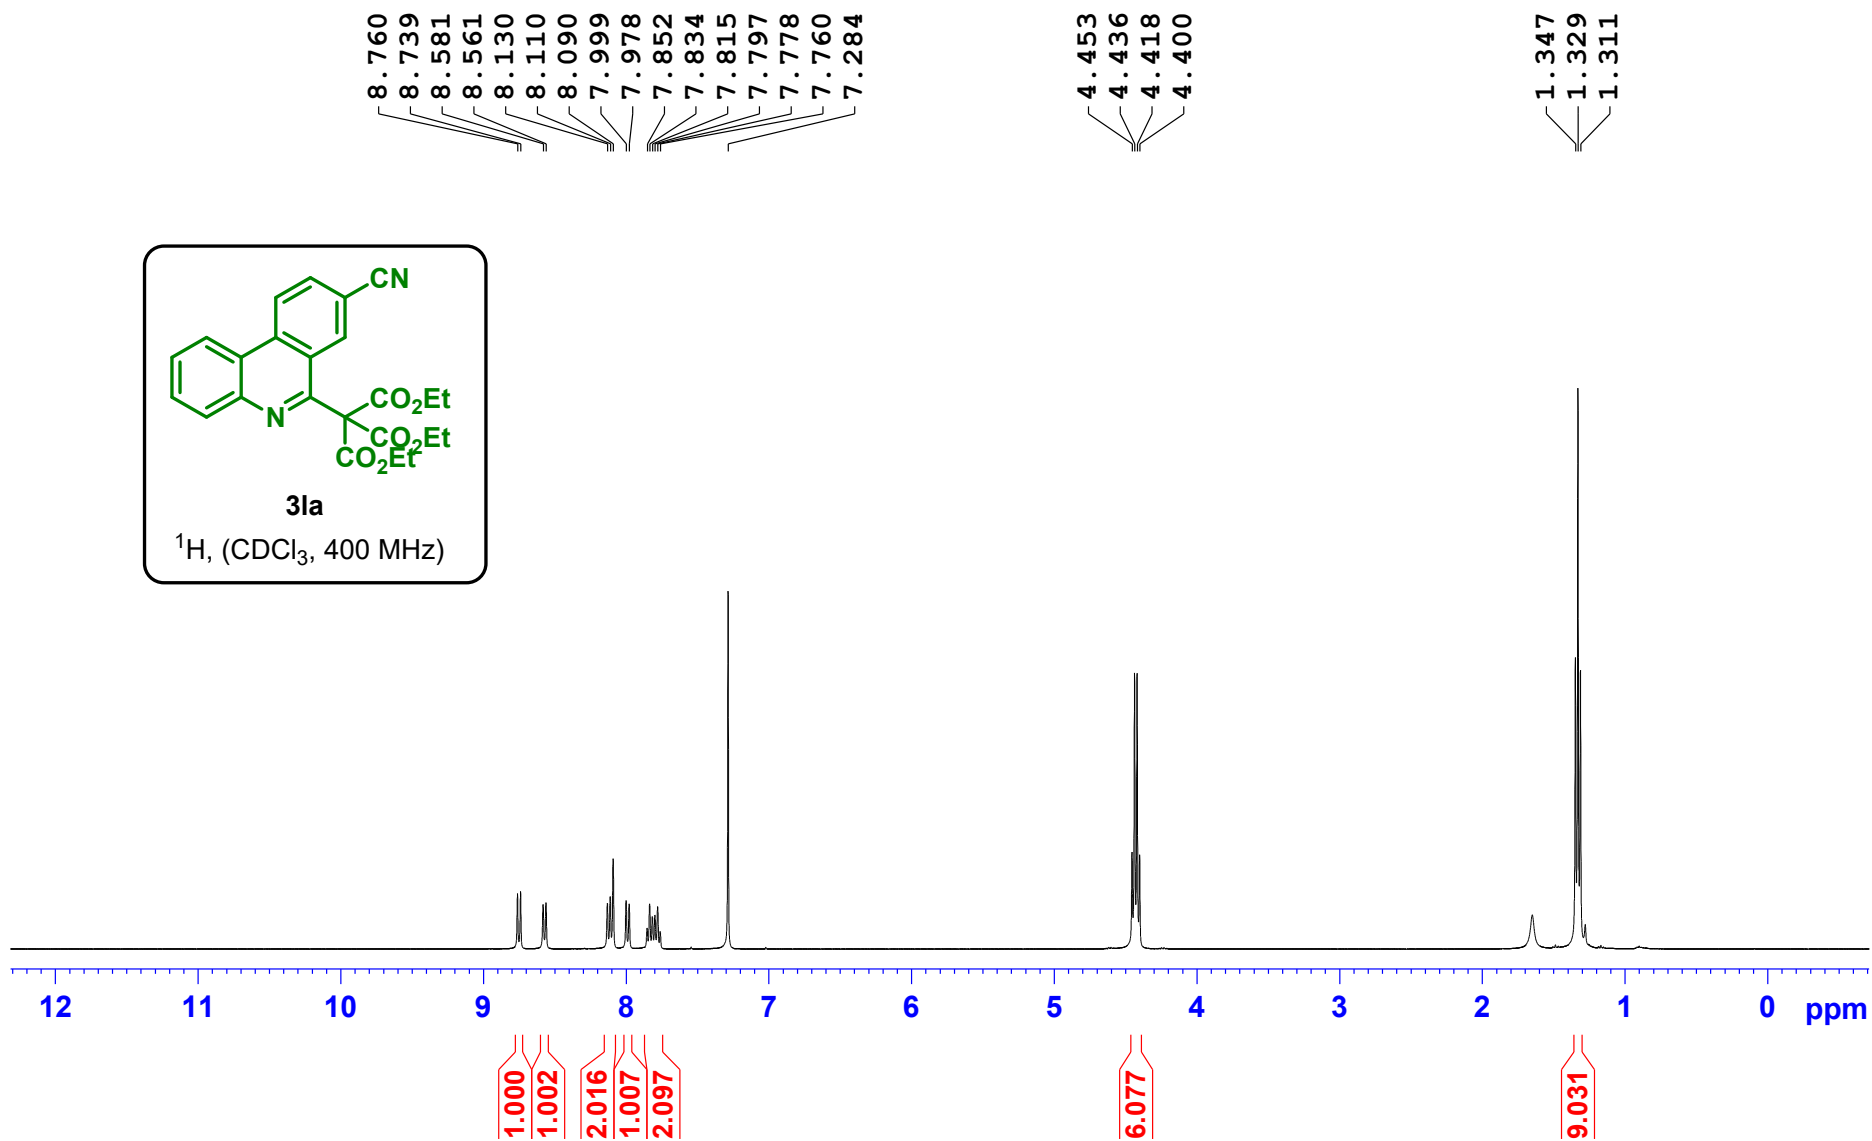

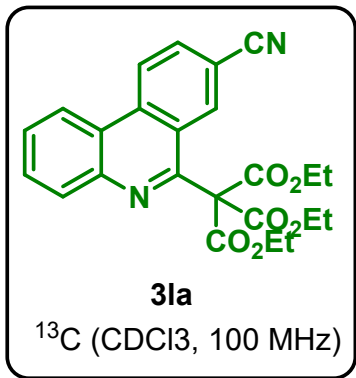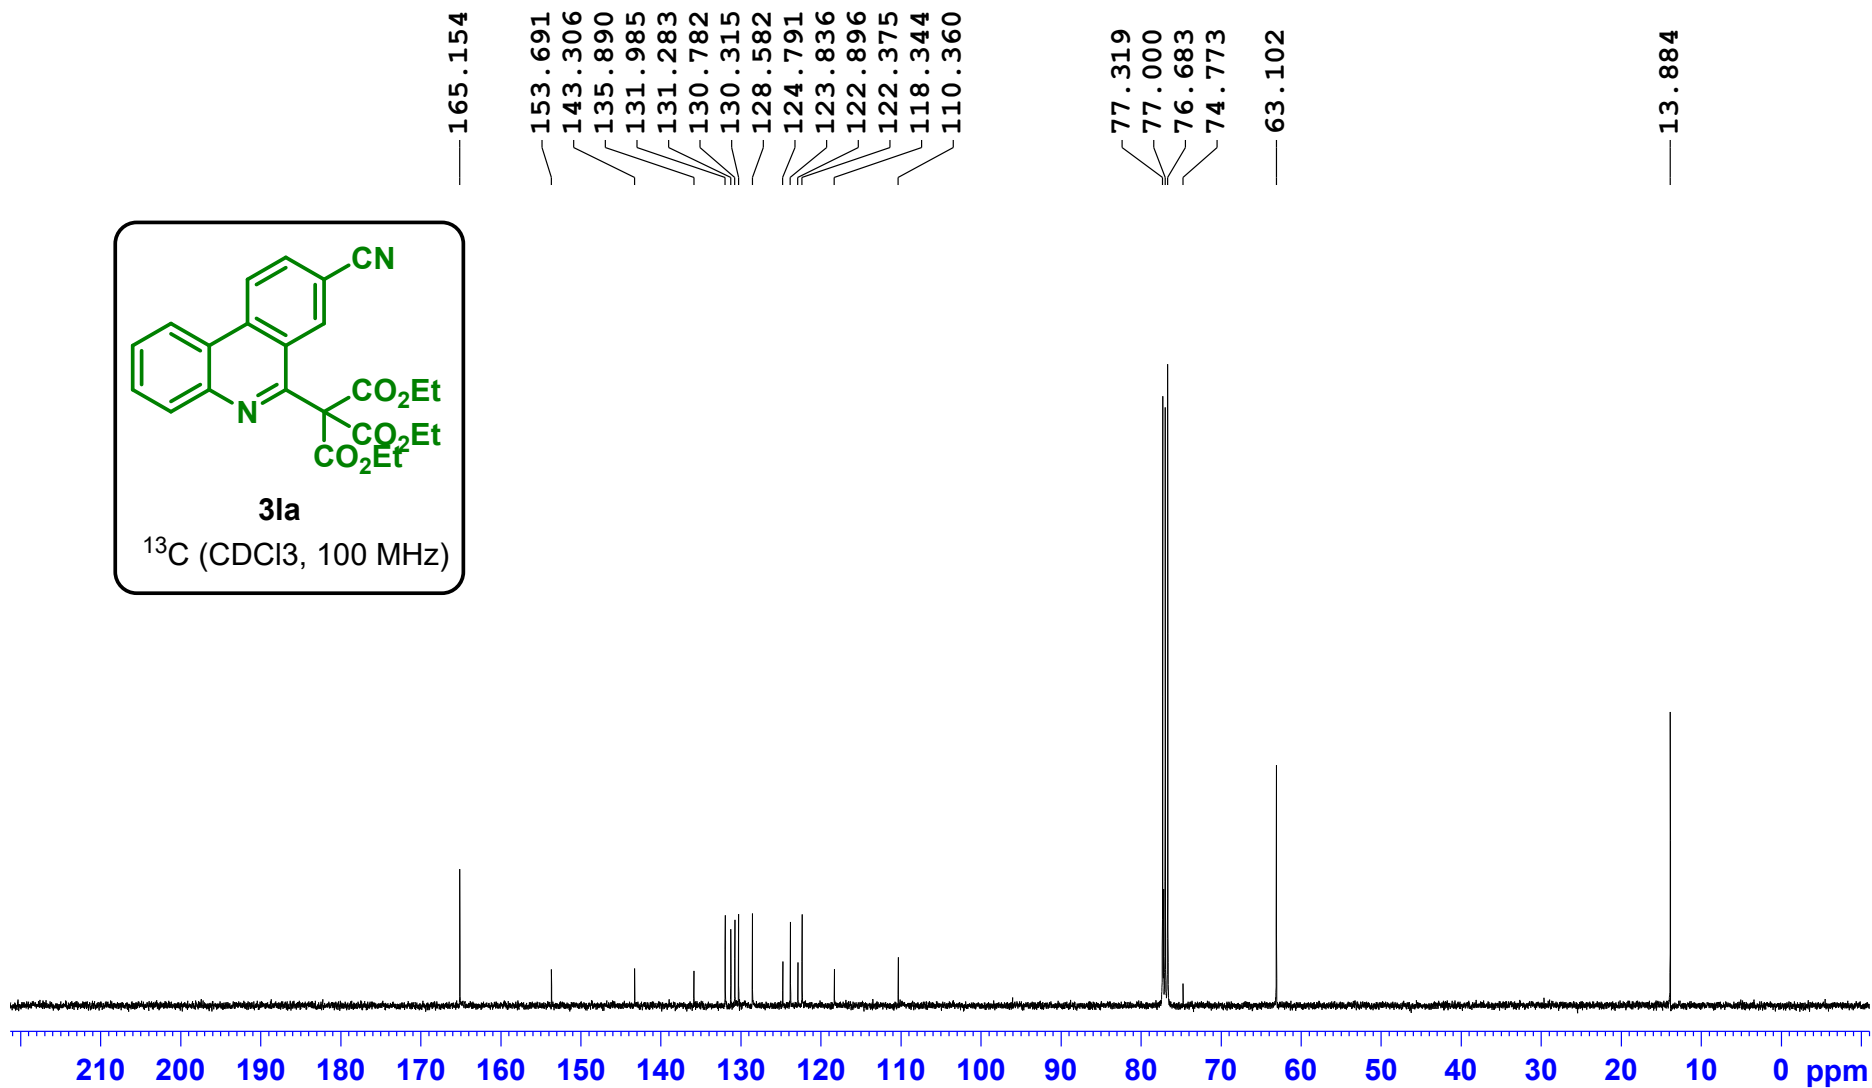

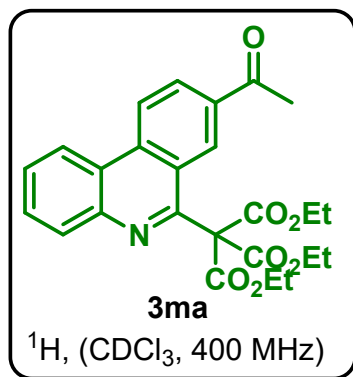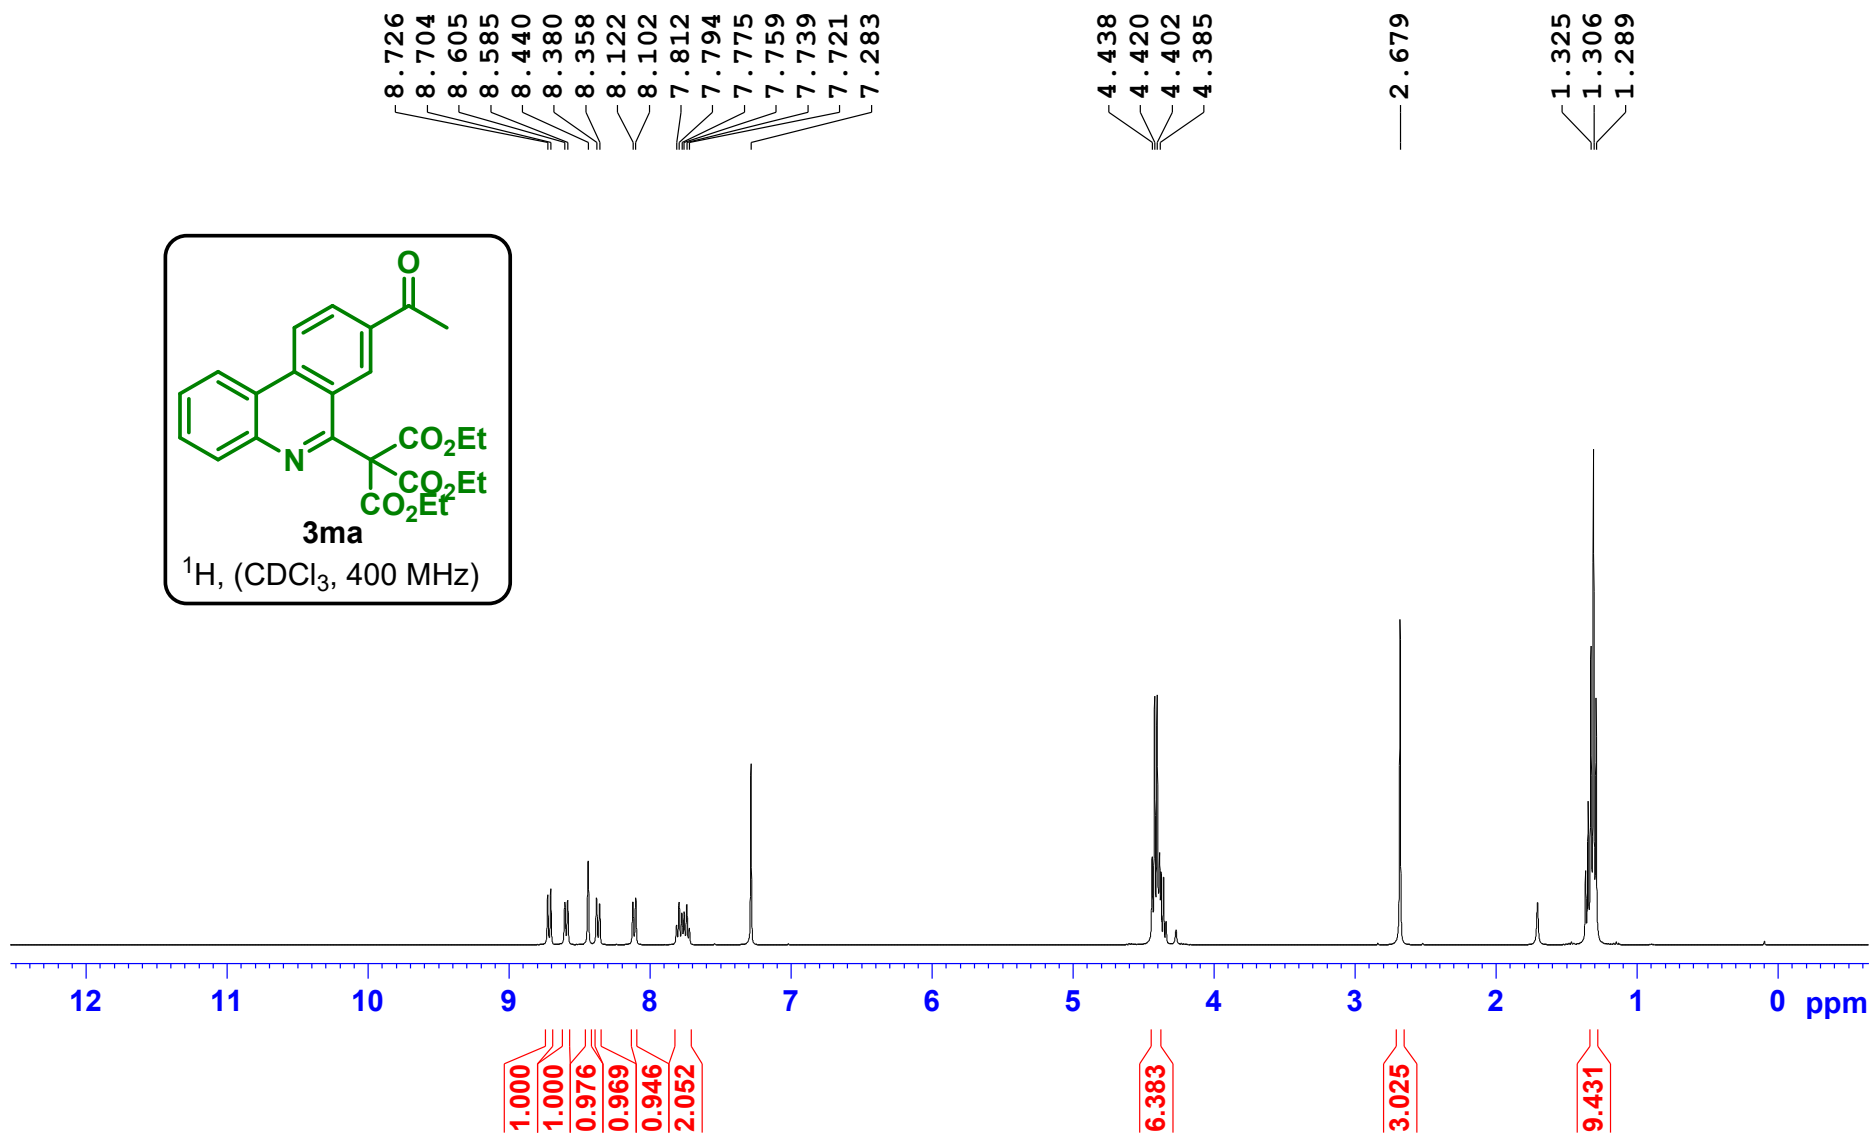

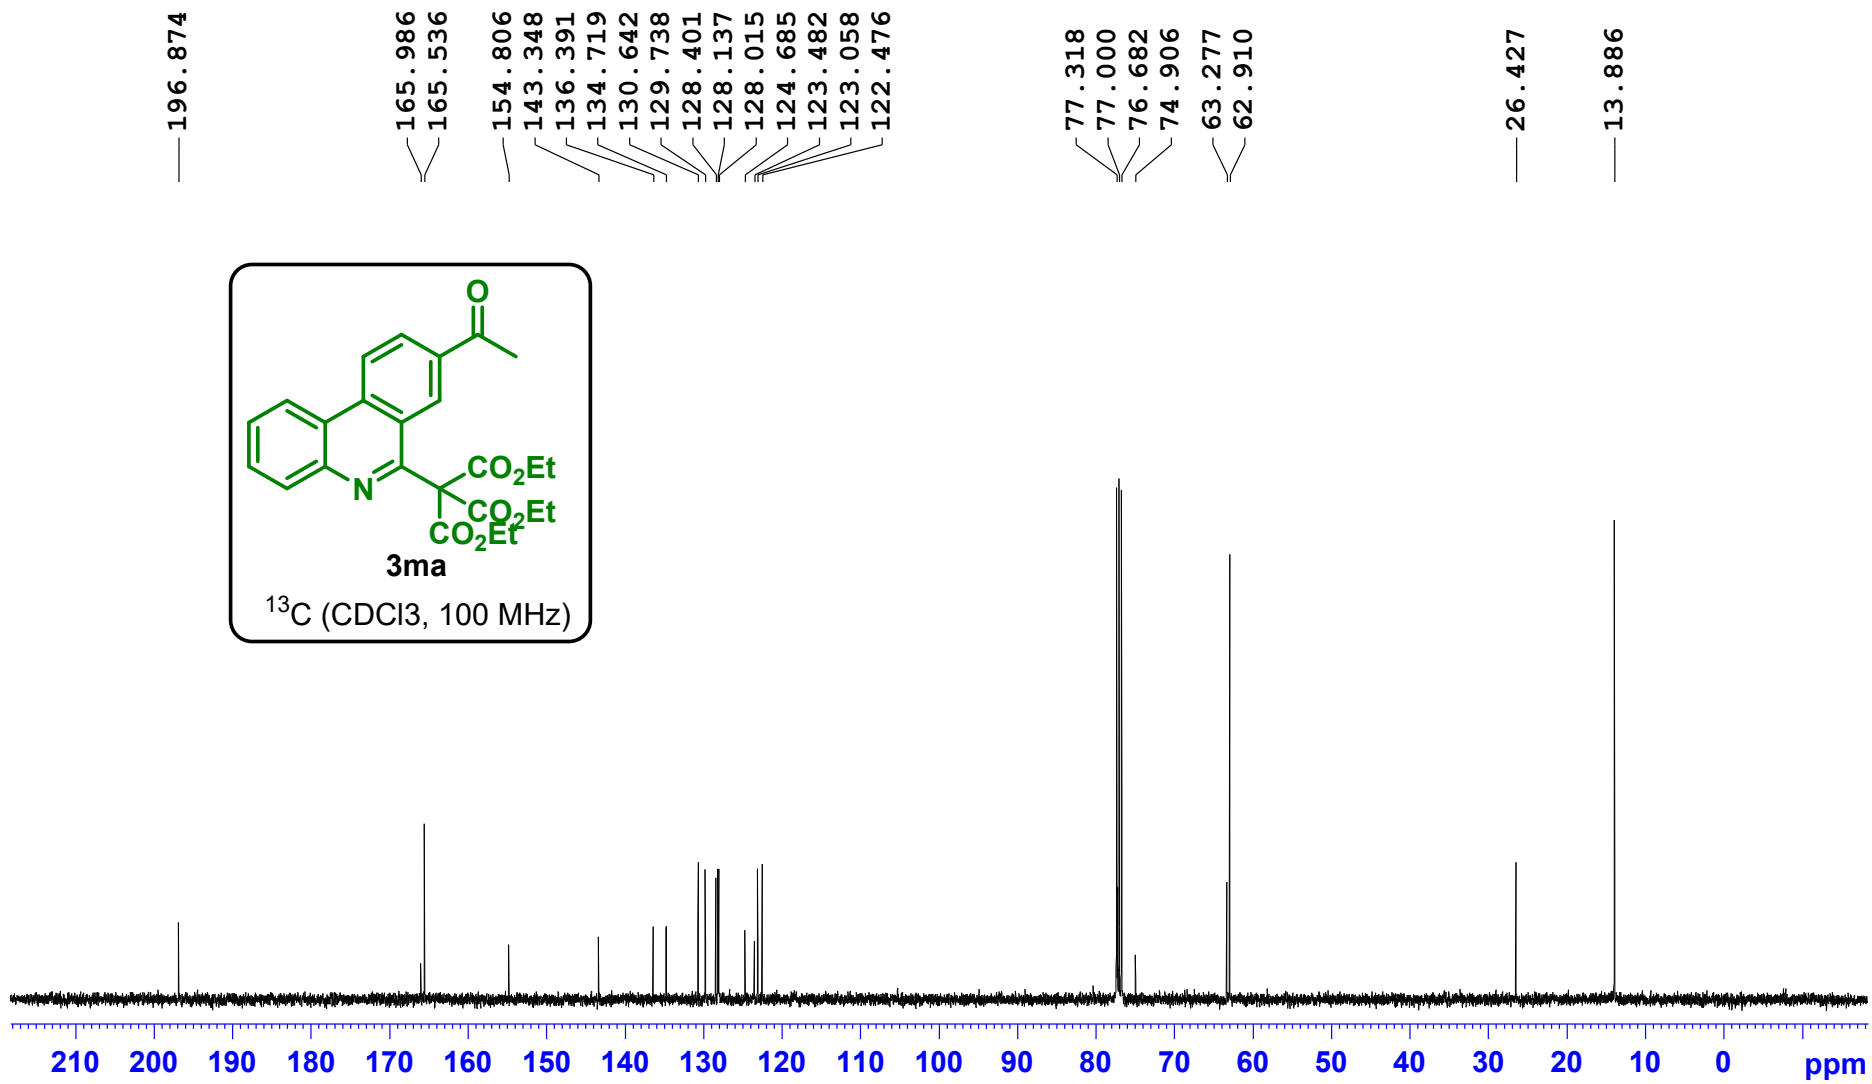

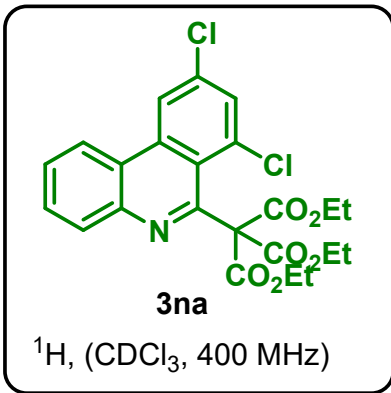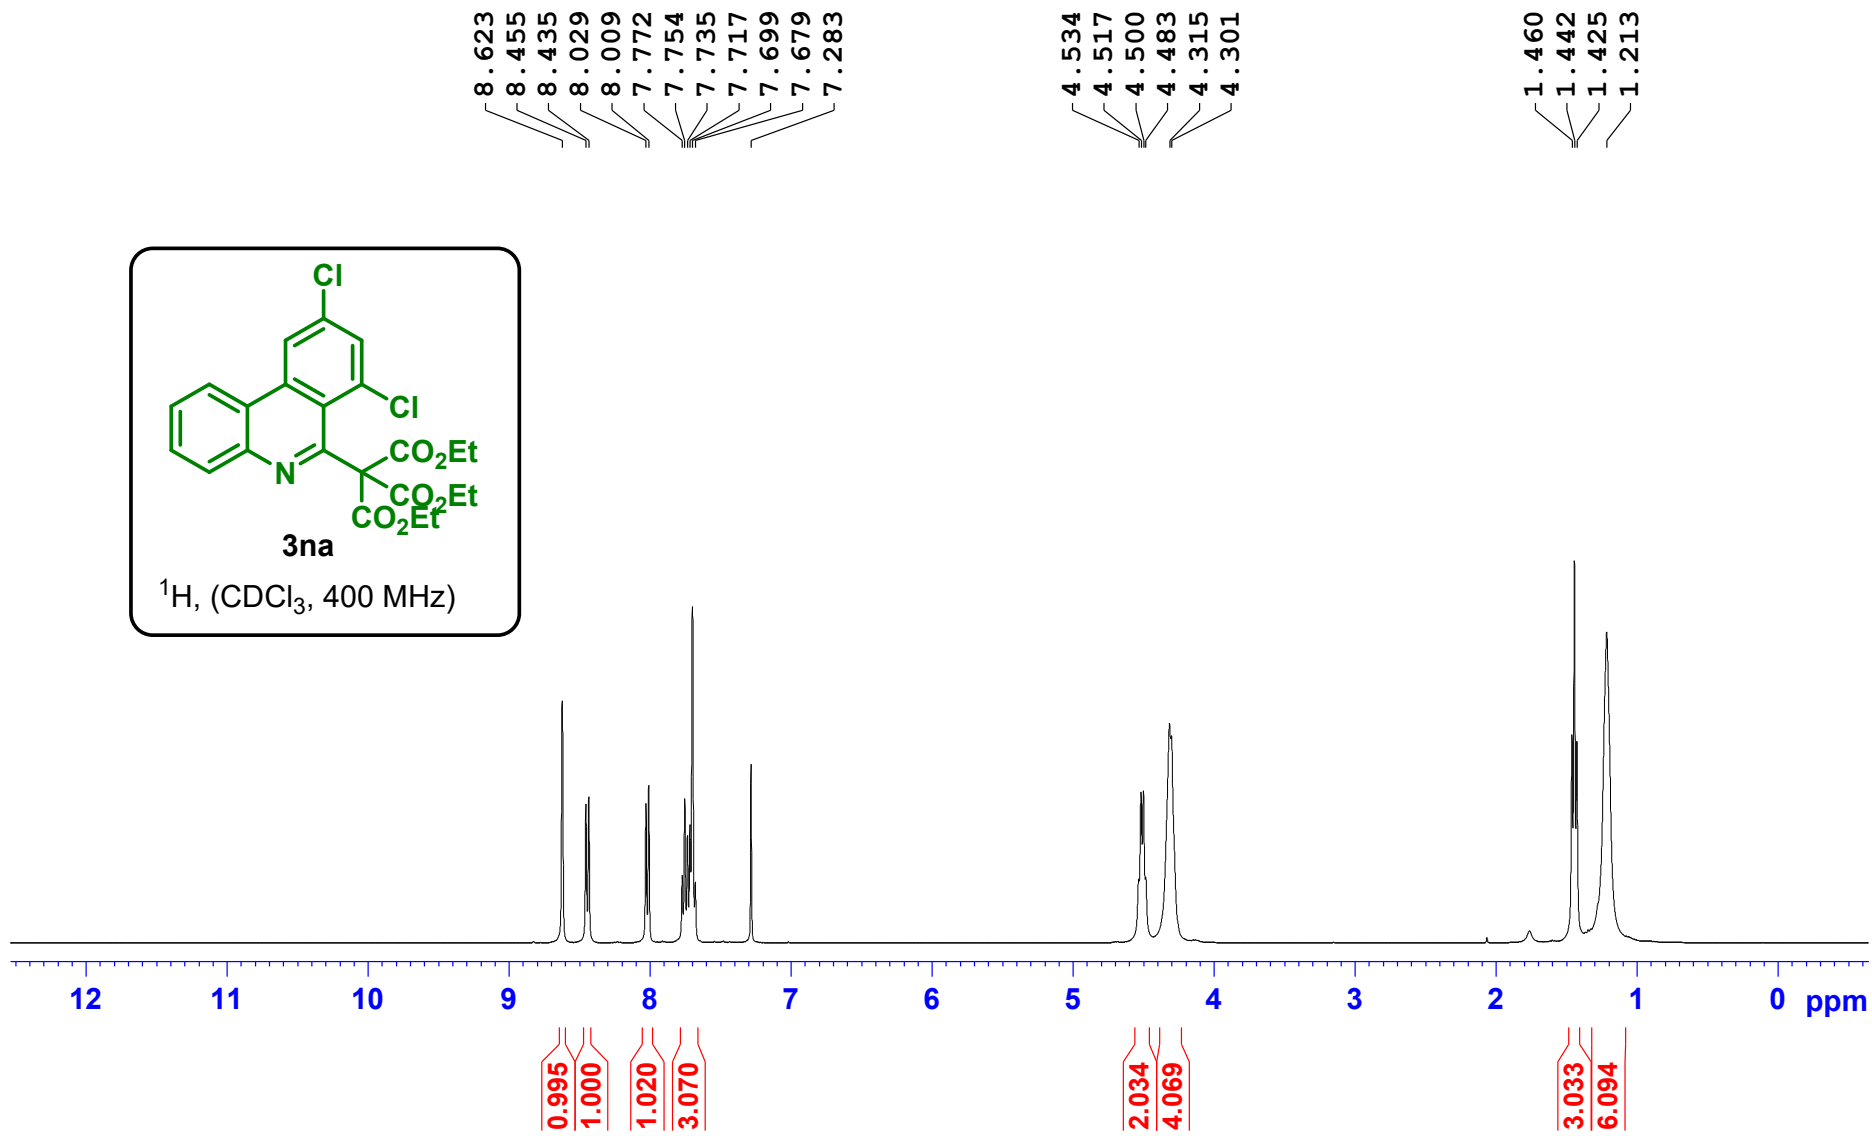

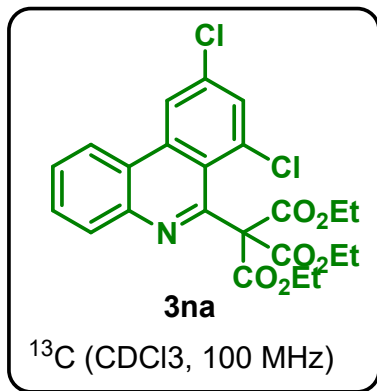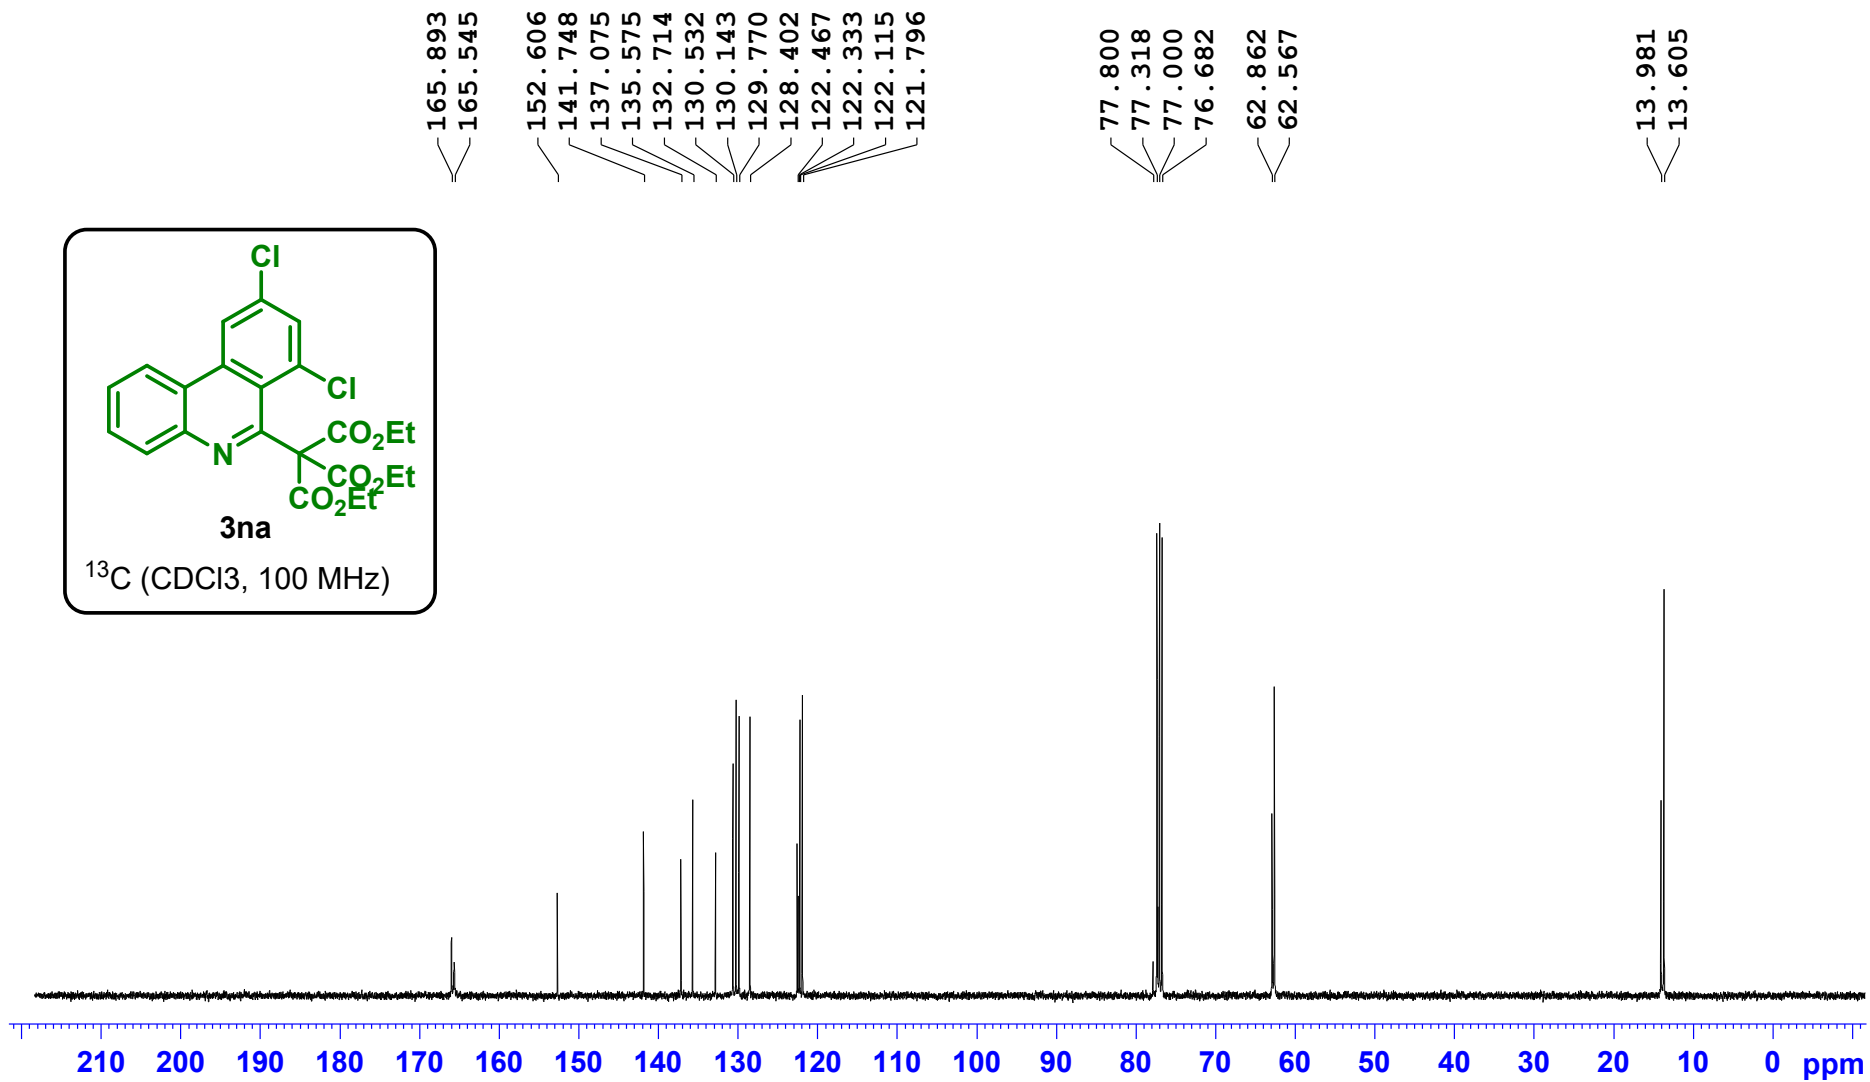

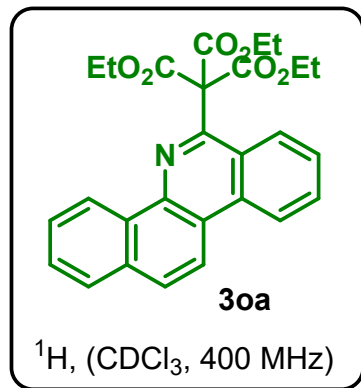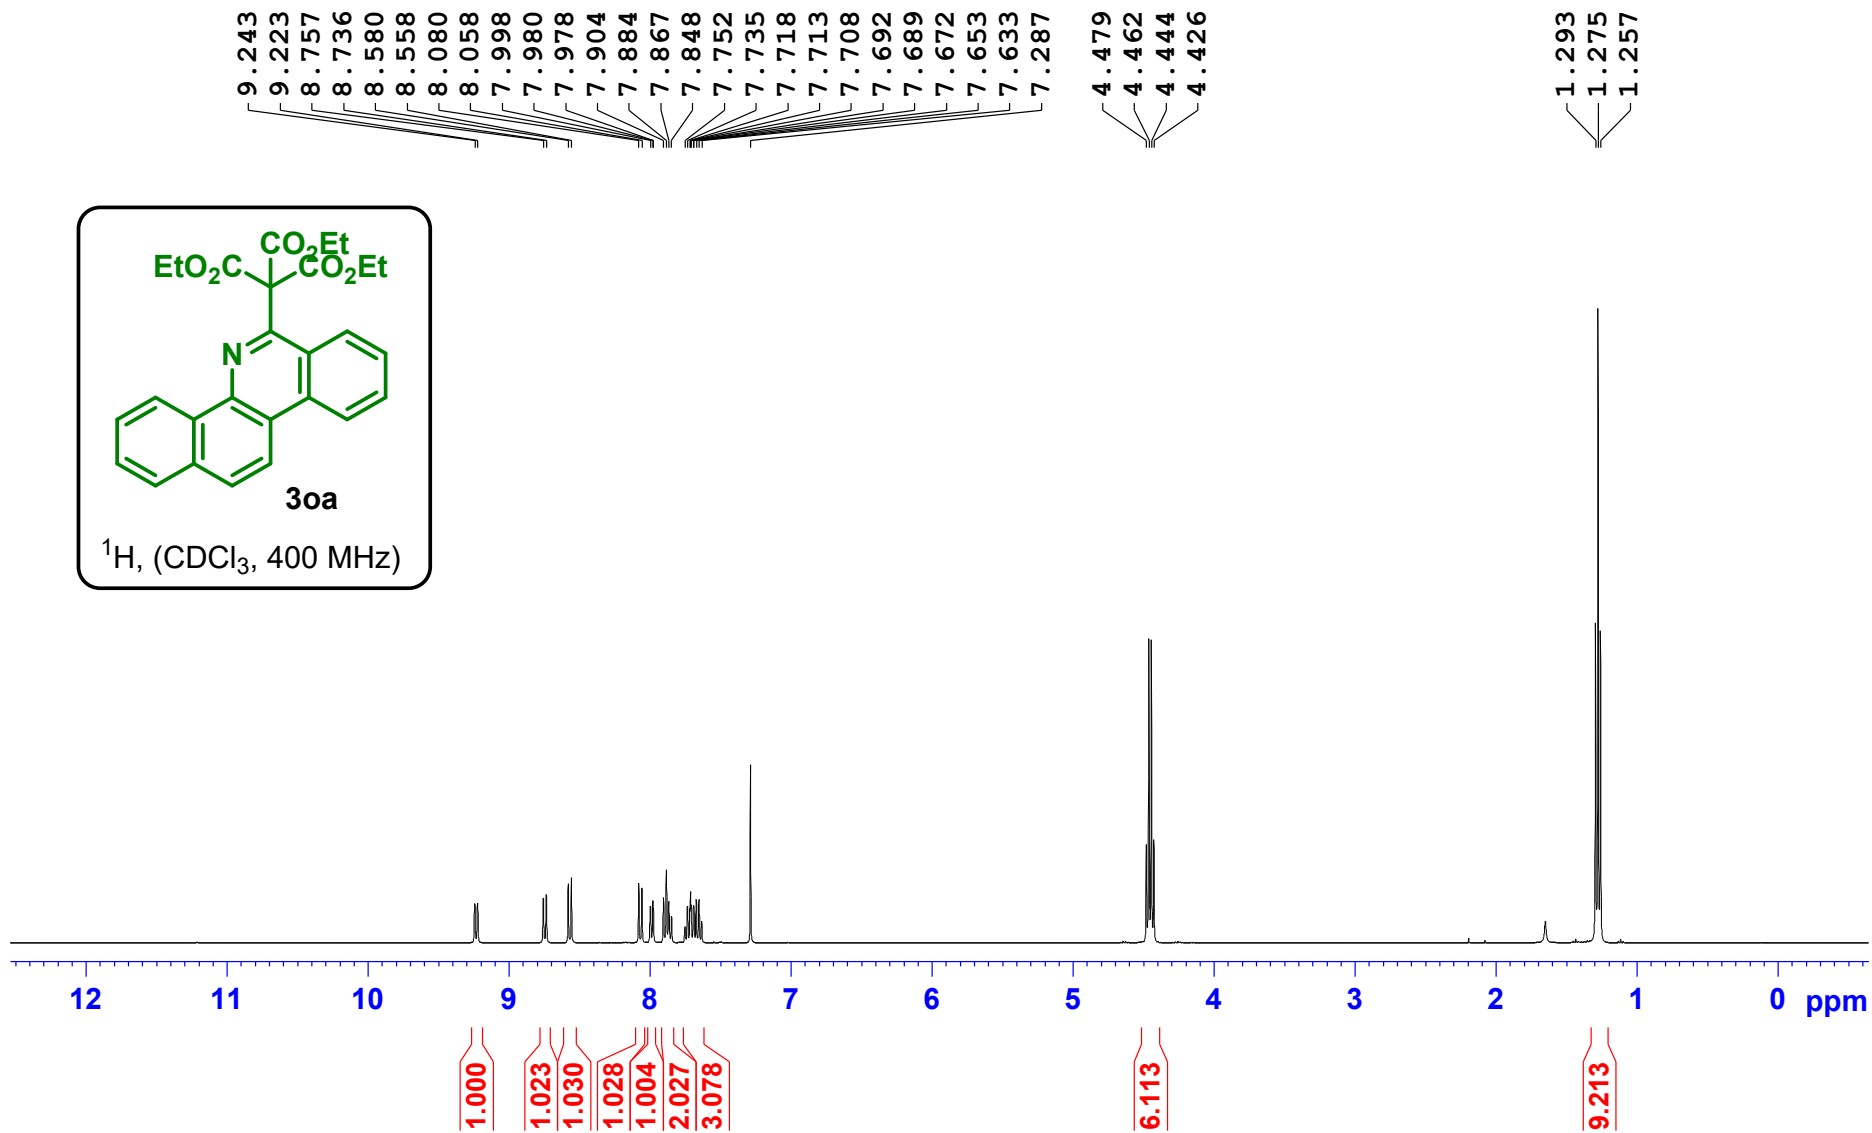



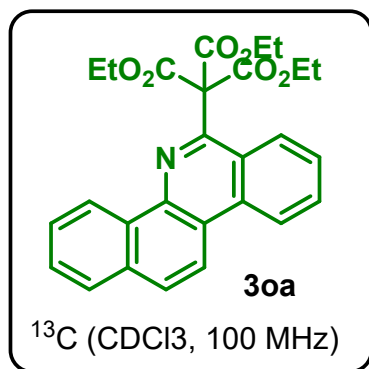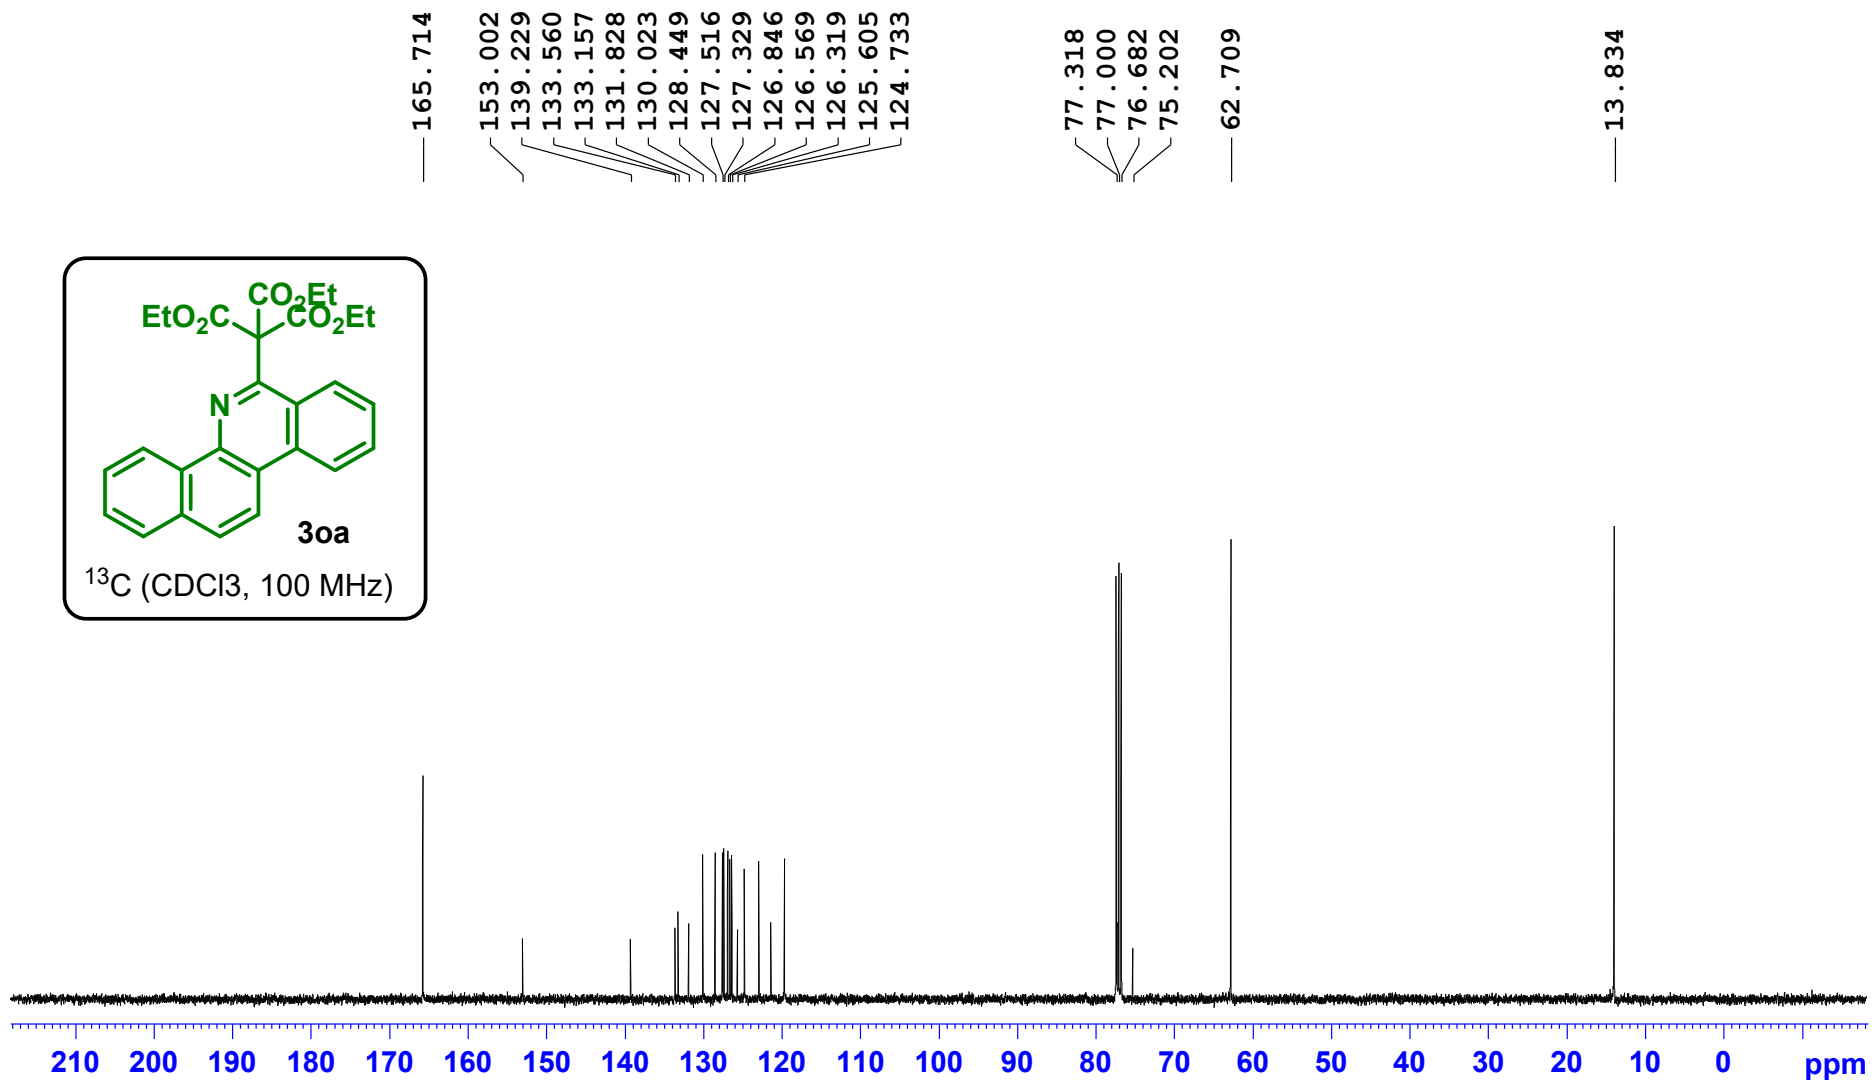

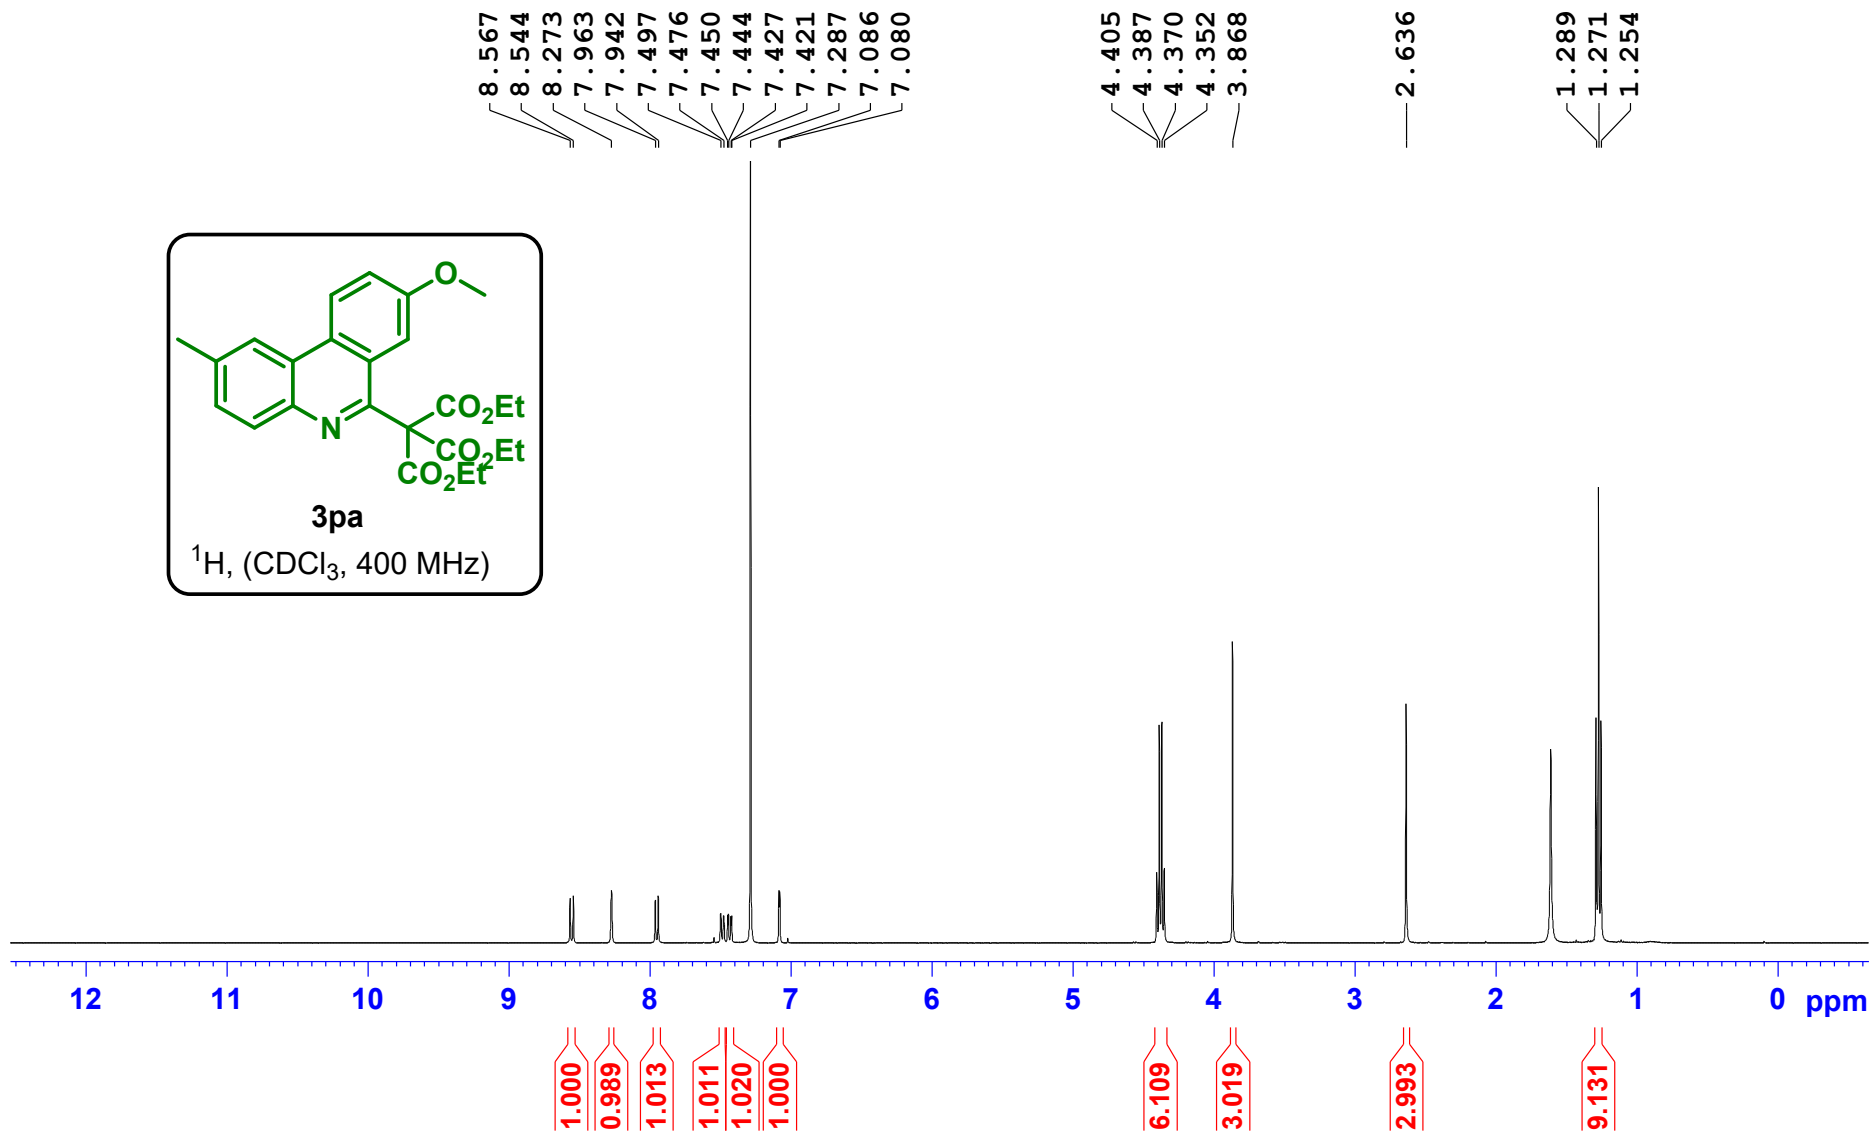

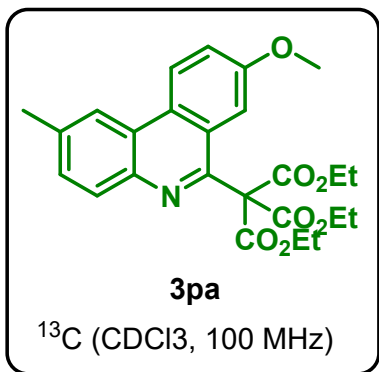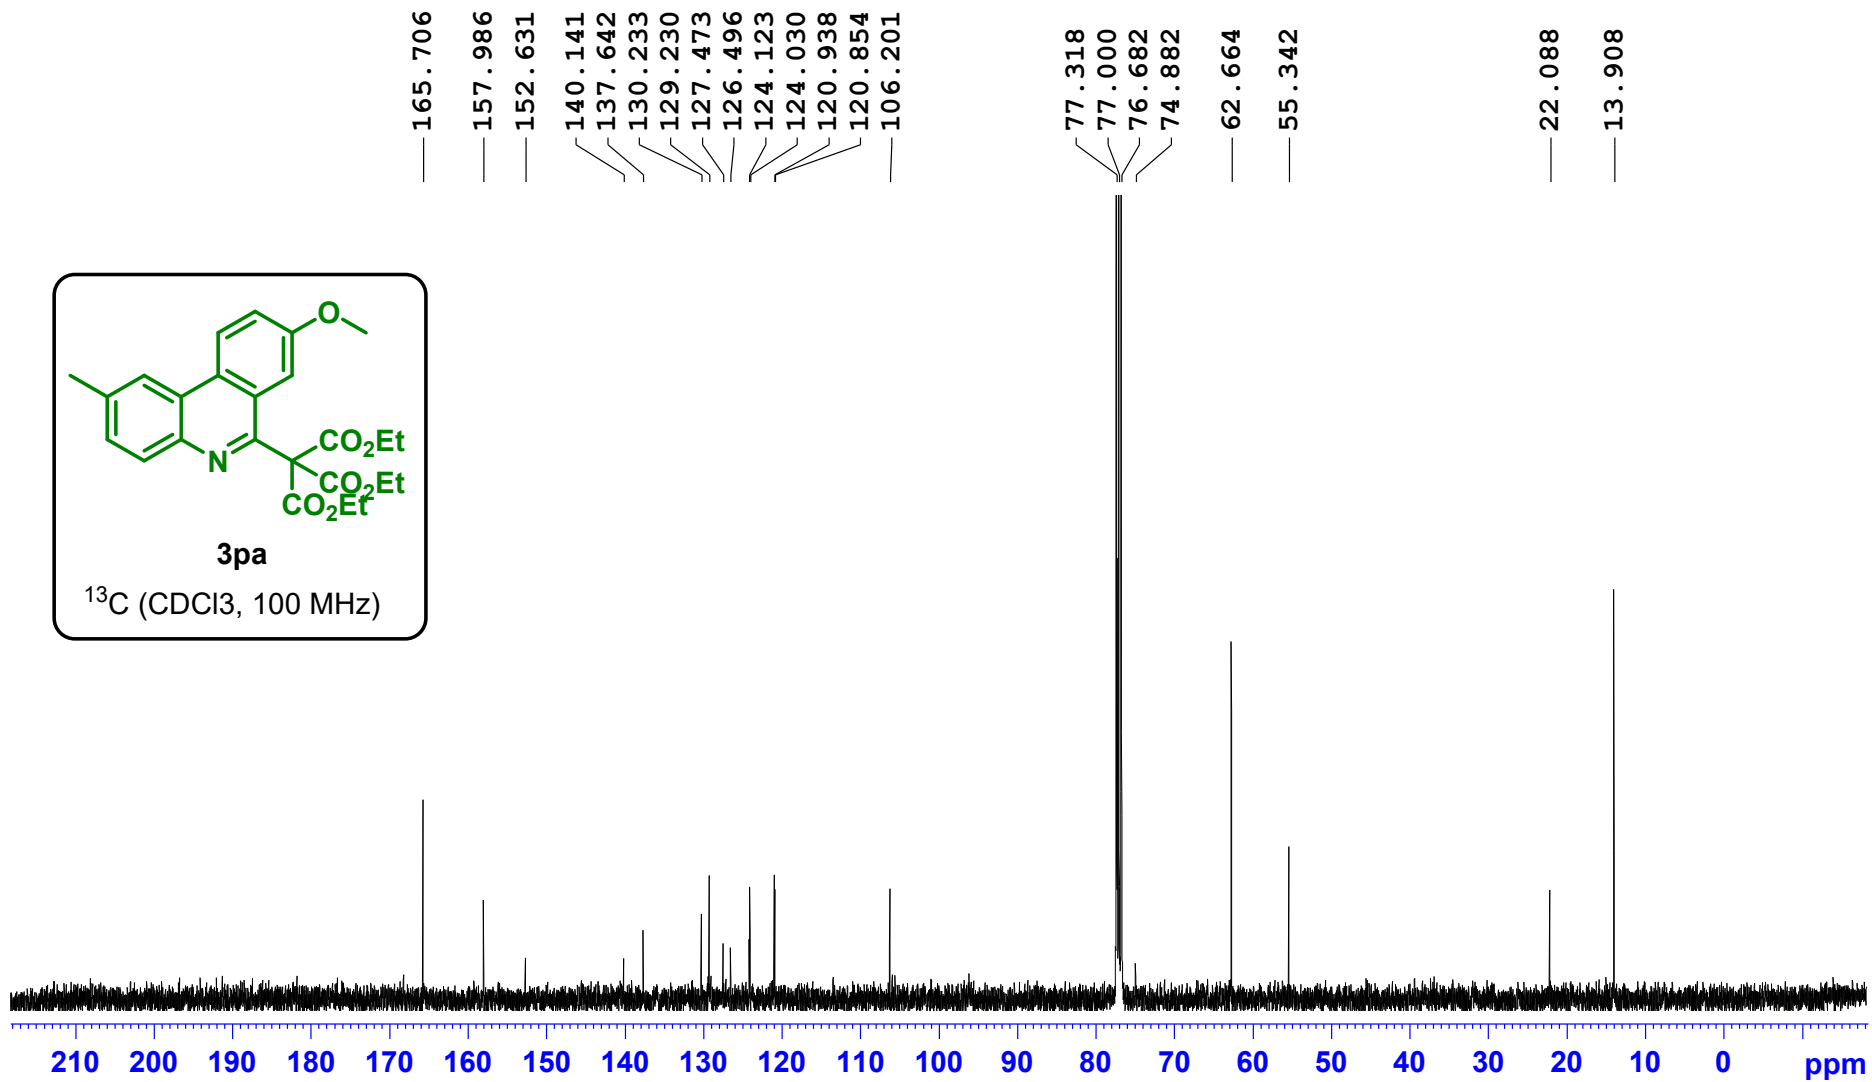

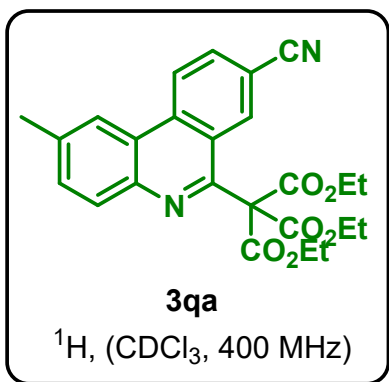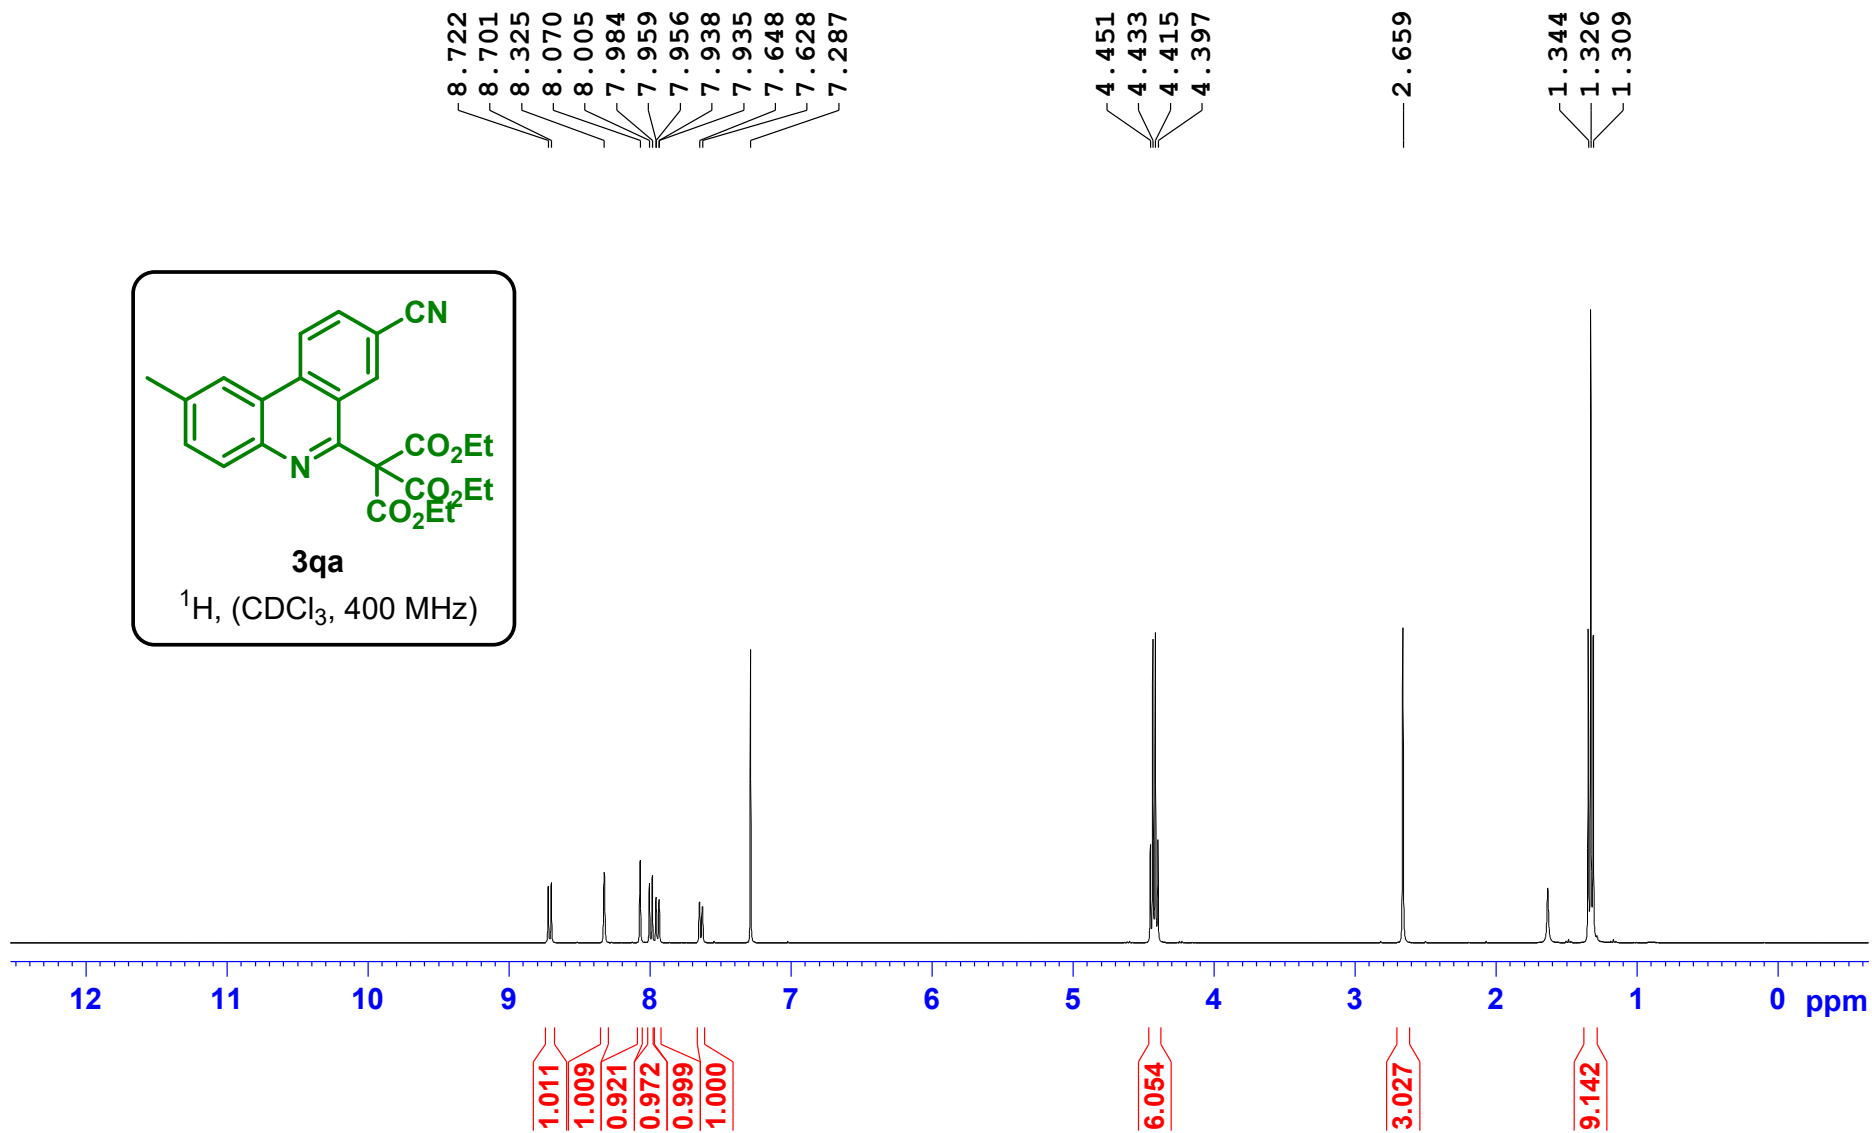

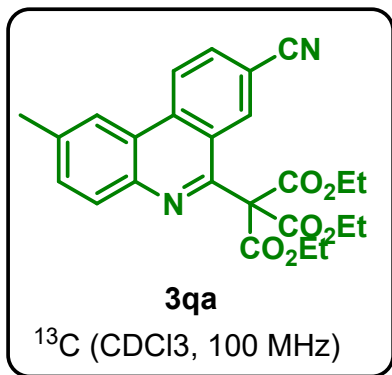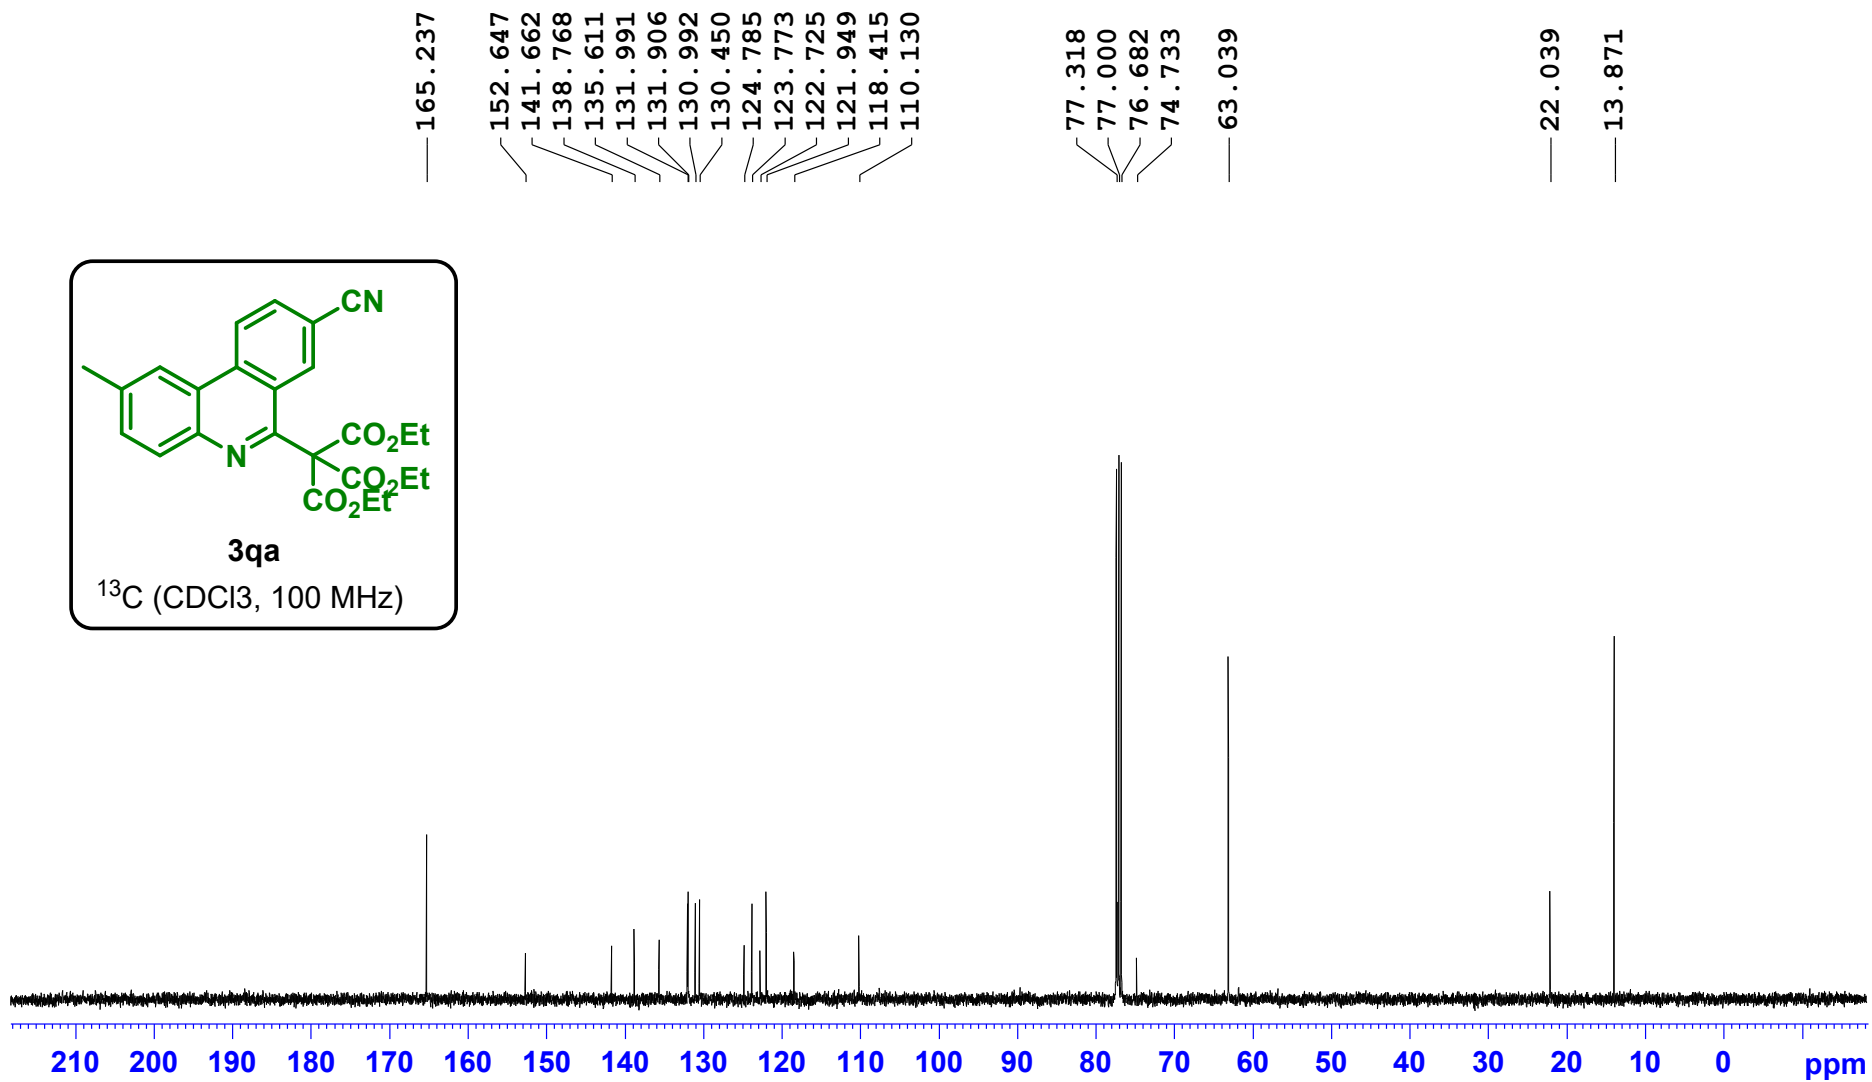

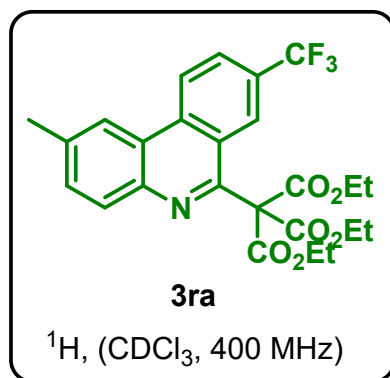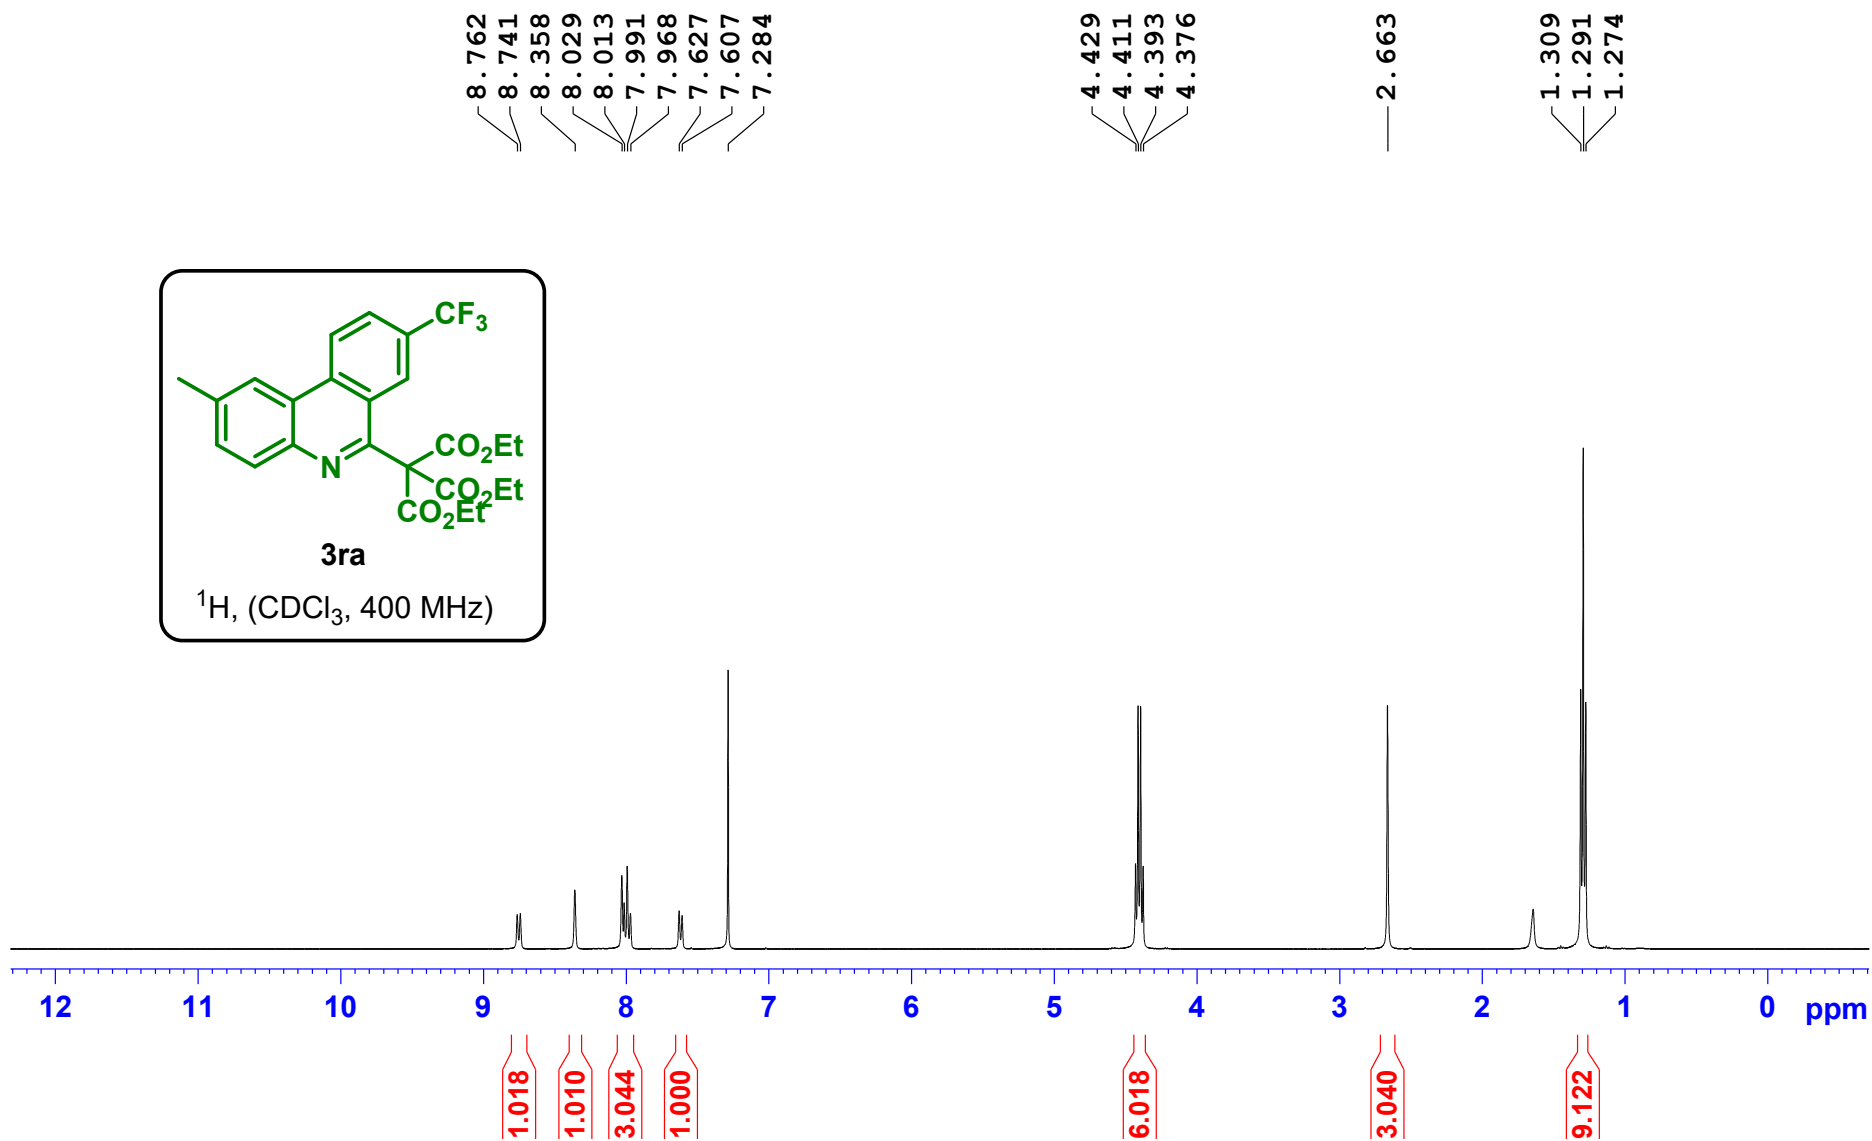

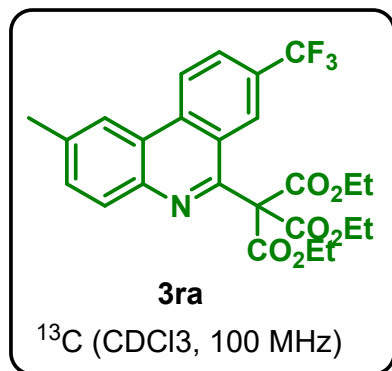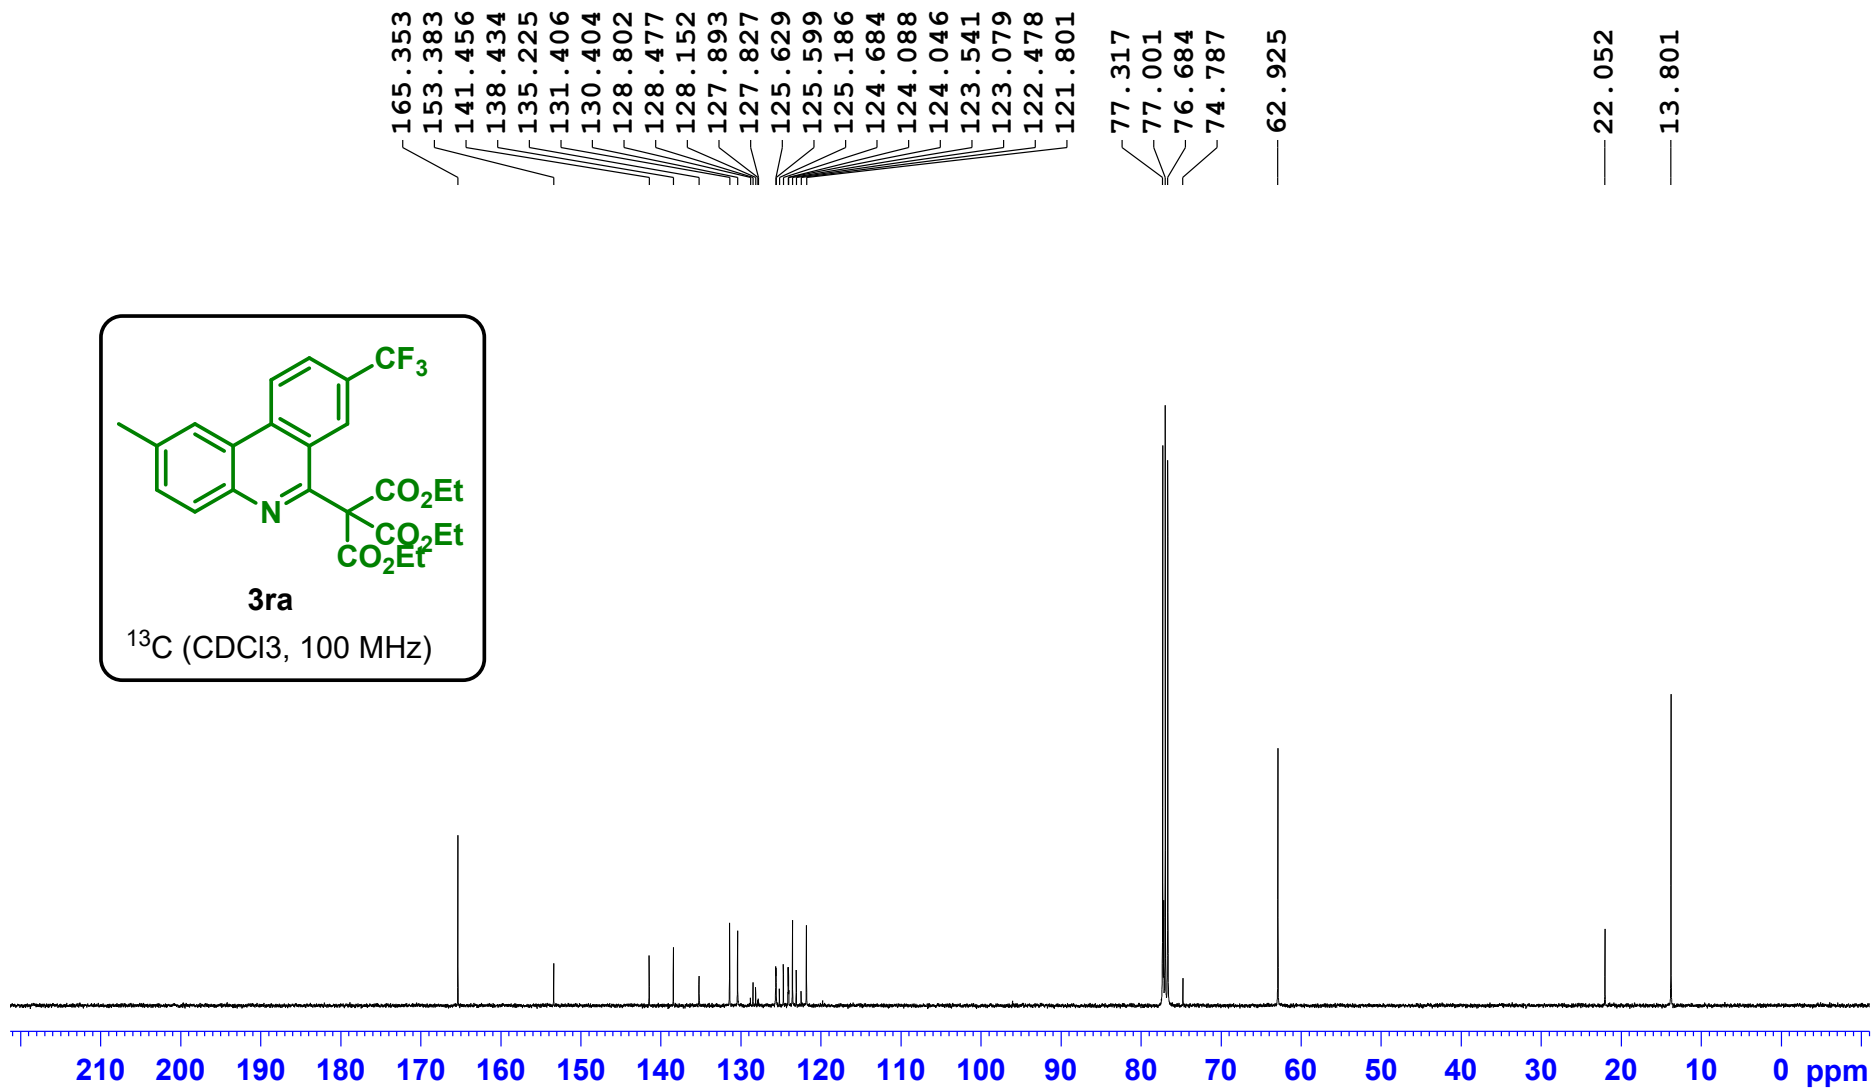

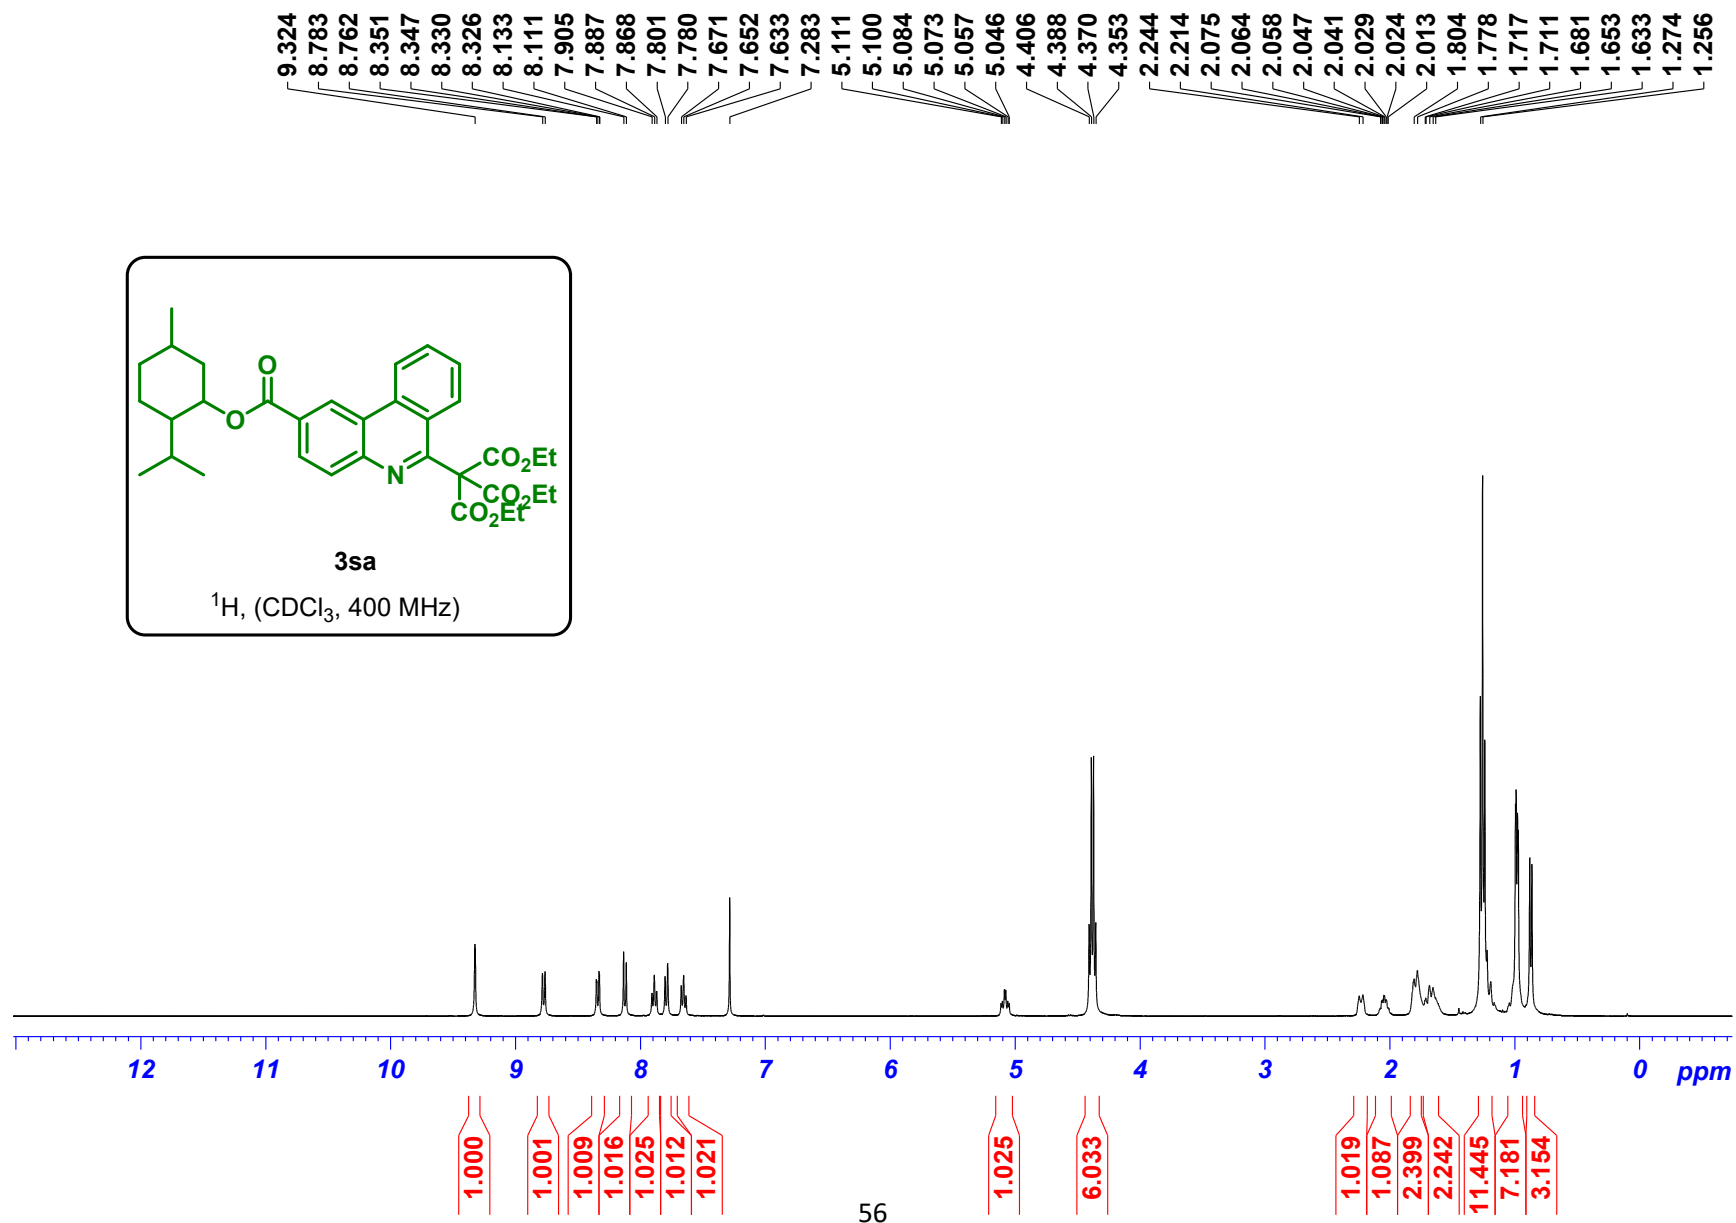



165.872  
165.328  
156.701  
144.764  
133.334  
130.676  
130.516  
129.480  
128.510  
127.307  
126.386  
125.329  
124.484  
123.702  
122.685

77.318  
77.201  
77.000  
76.682  
75.344  
74.766  
62.785

47.270  
40.972  
34.268  
31.451  
26.617  
23.701  
22.018  
20.717  
16.601  
13.781

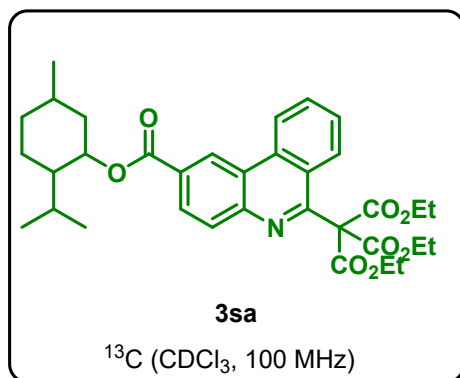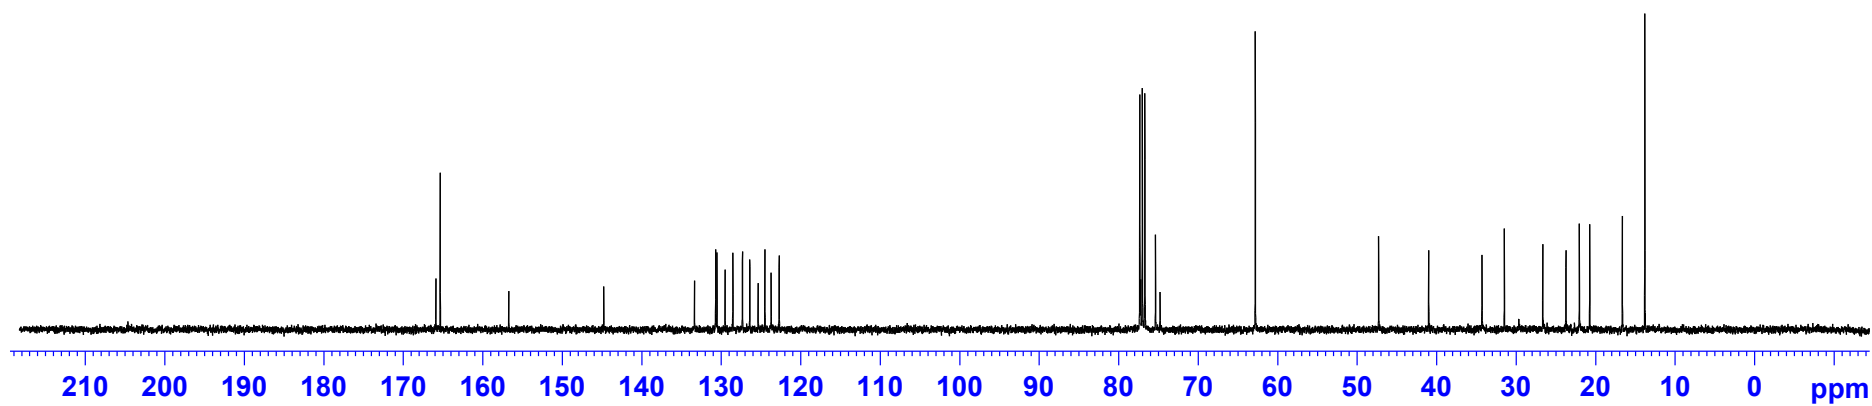

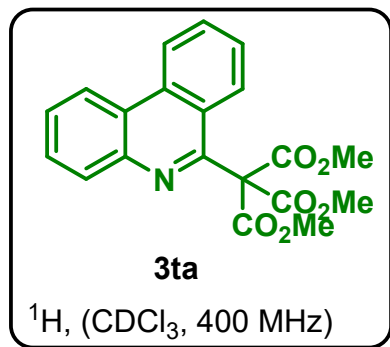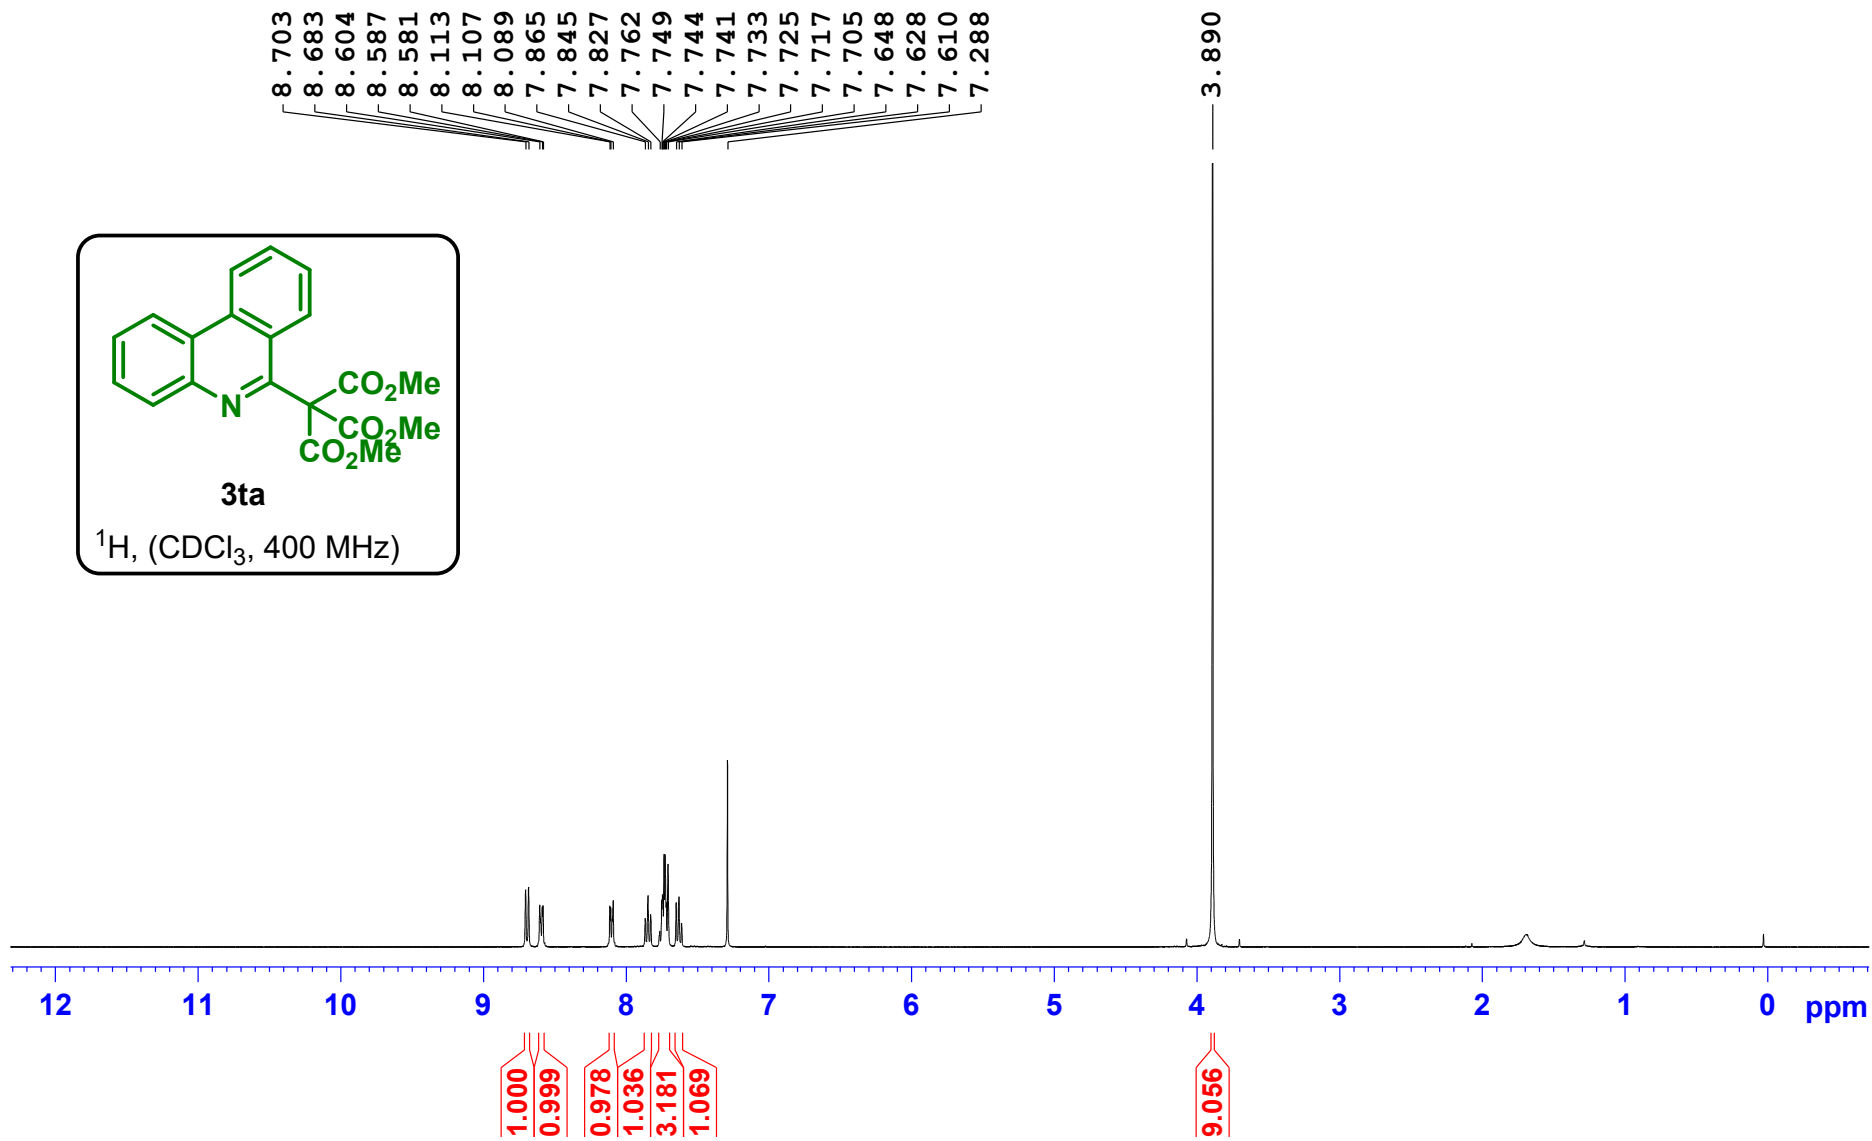

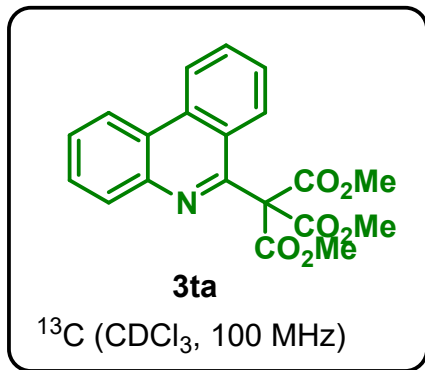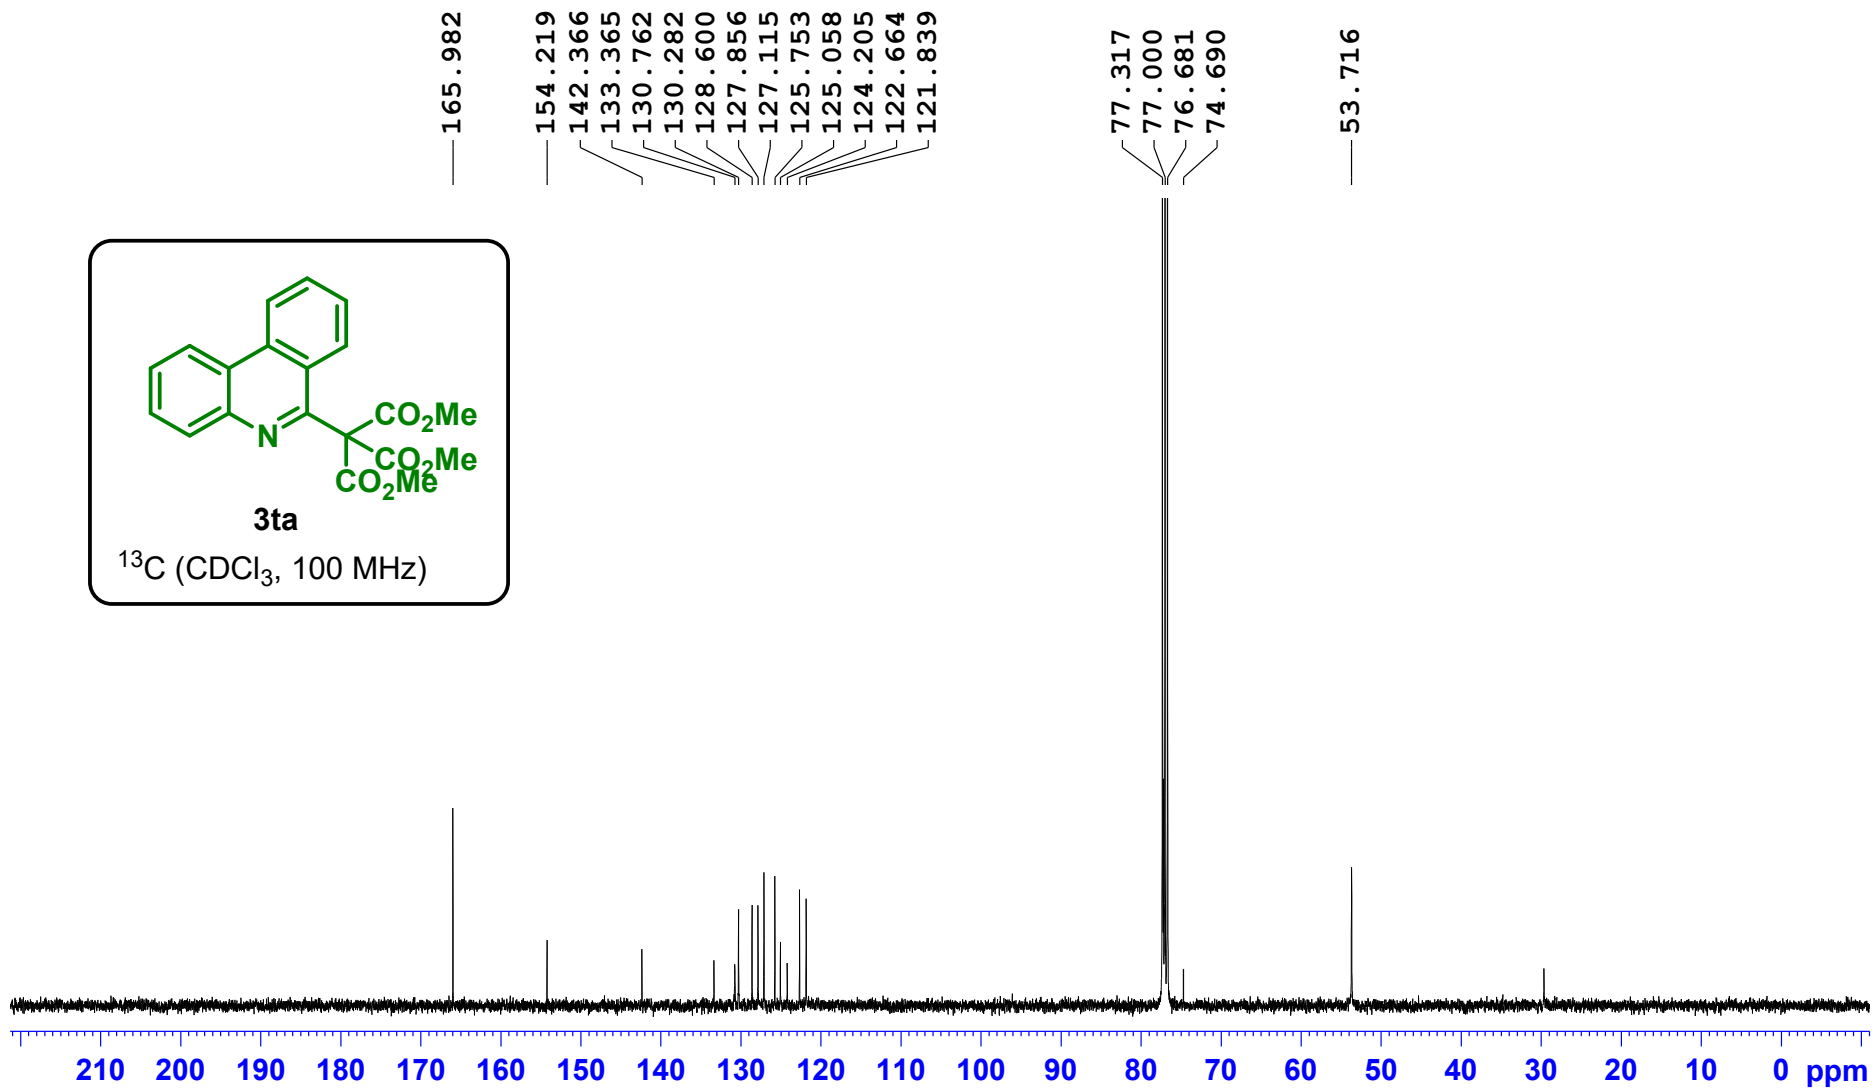

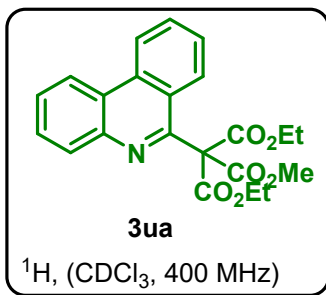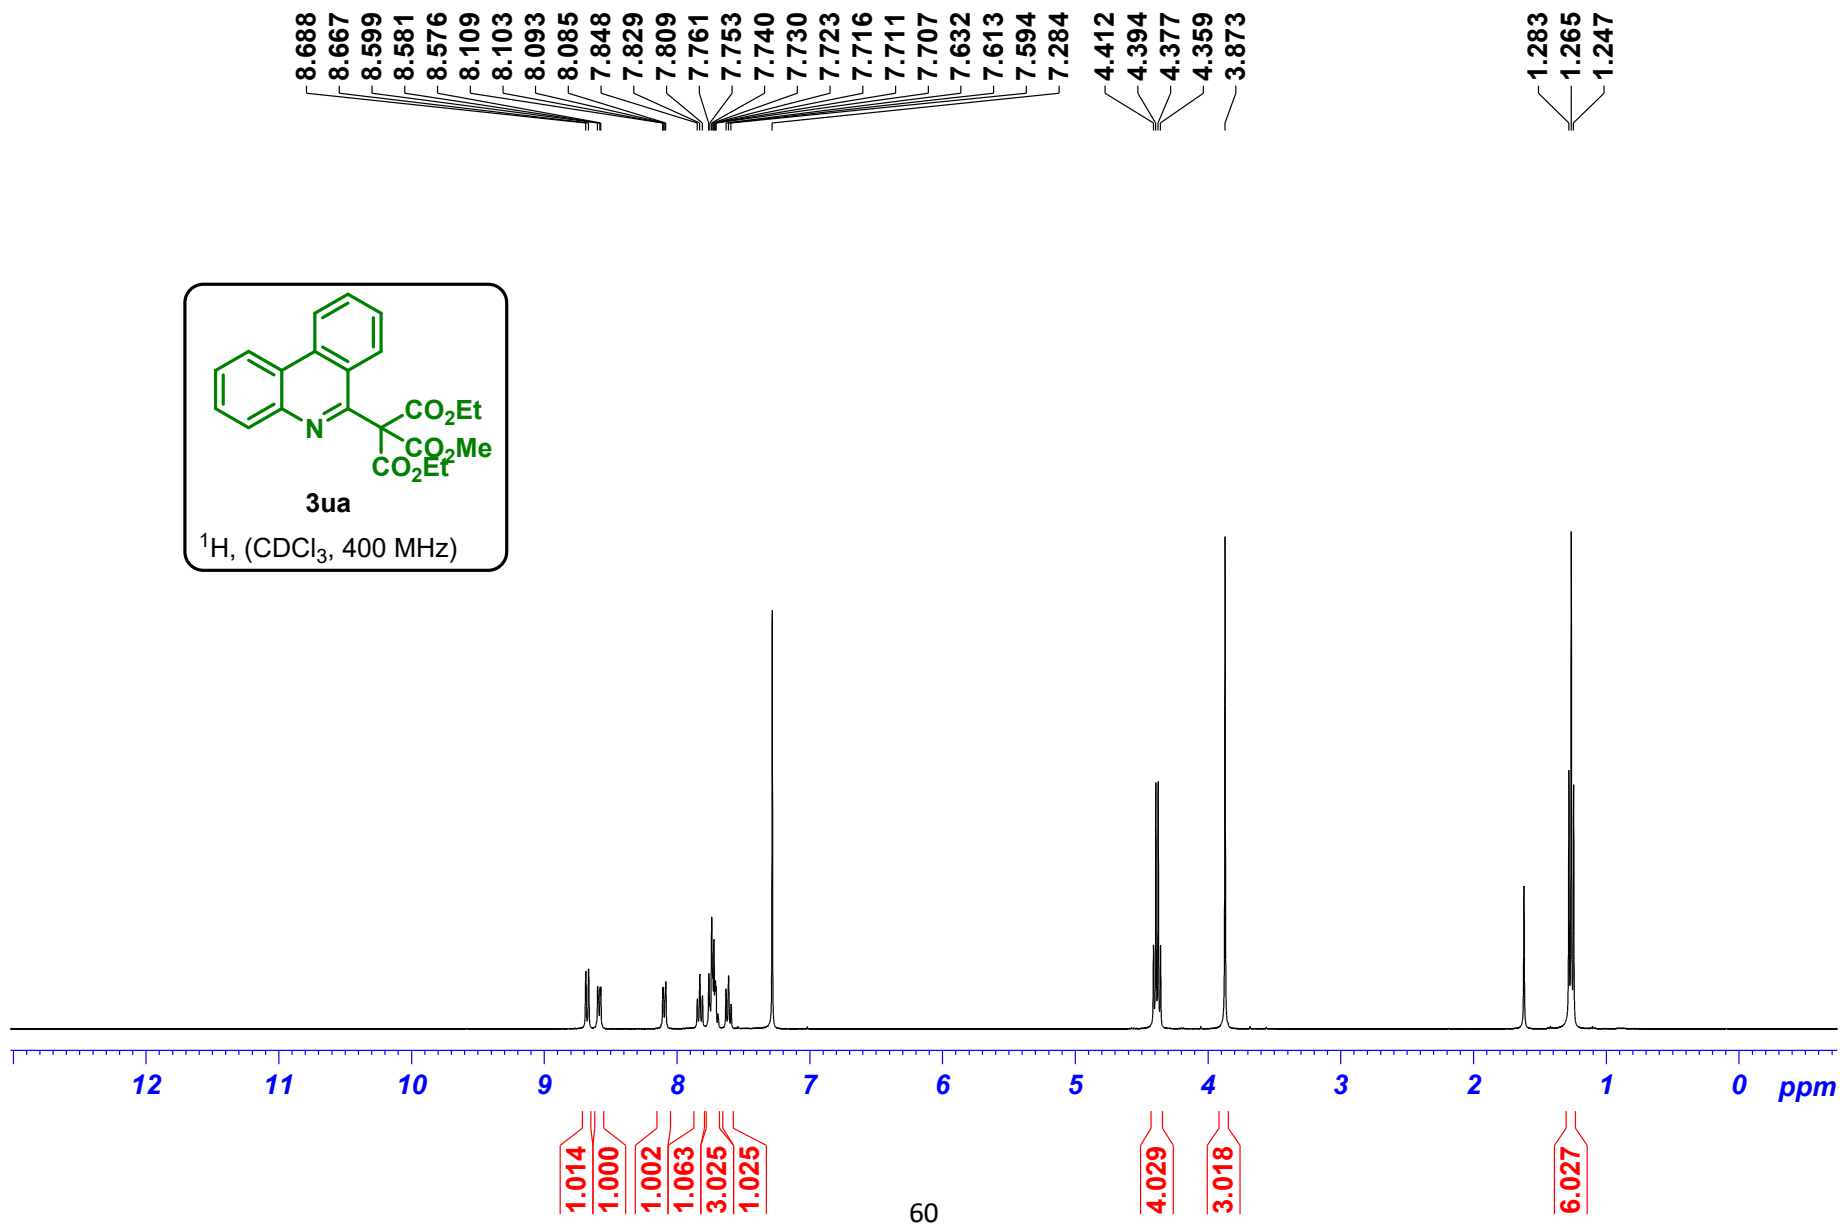

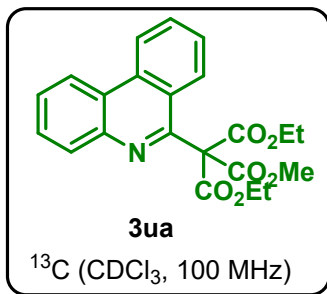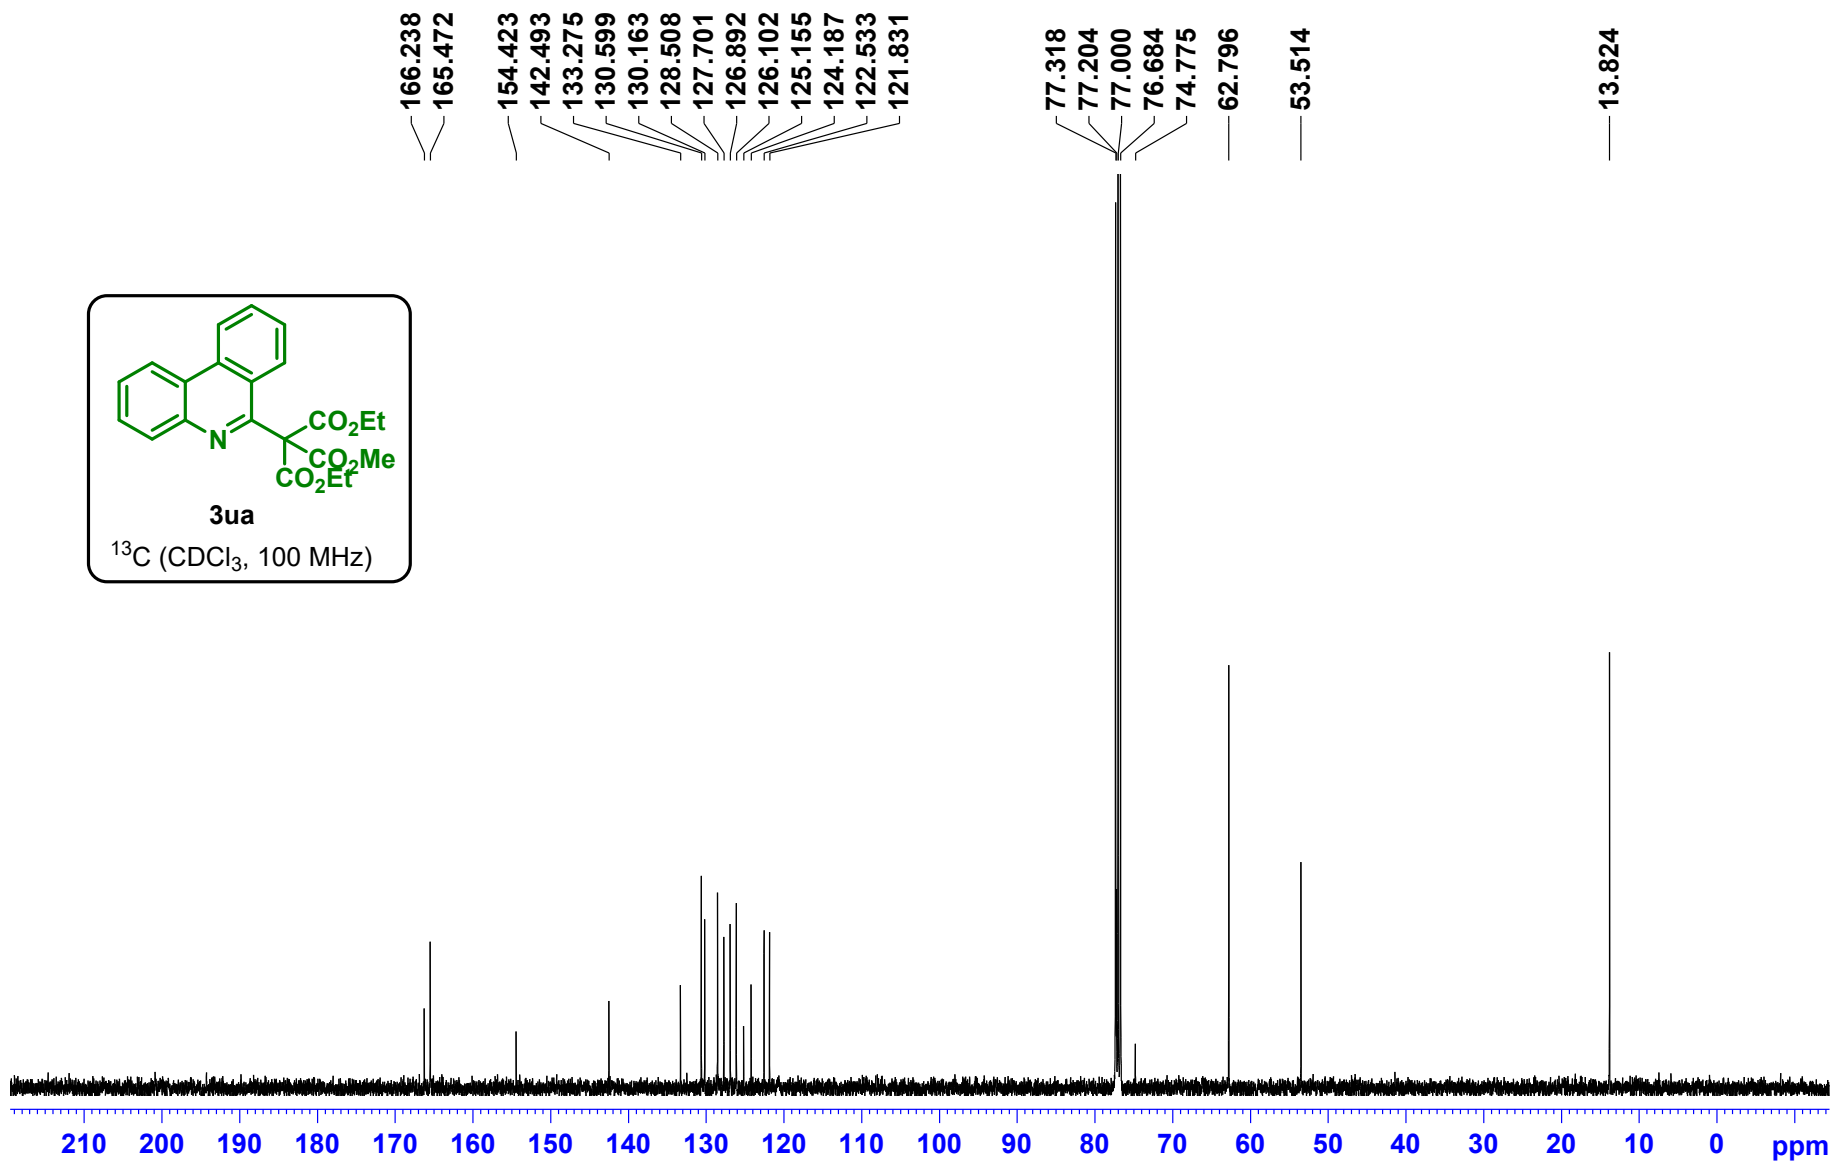

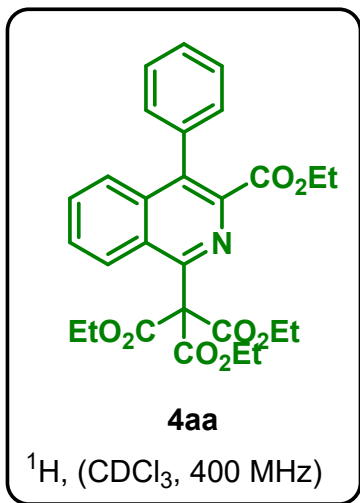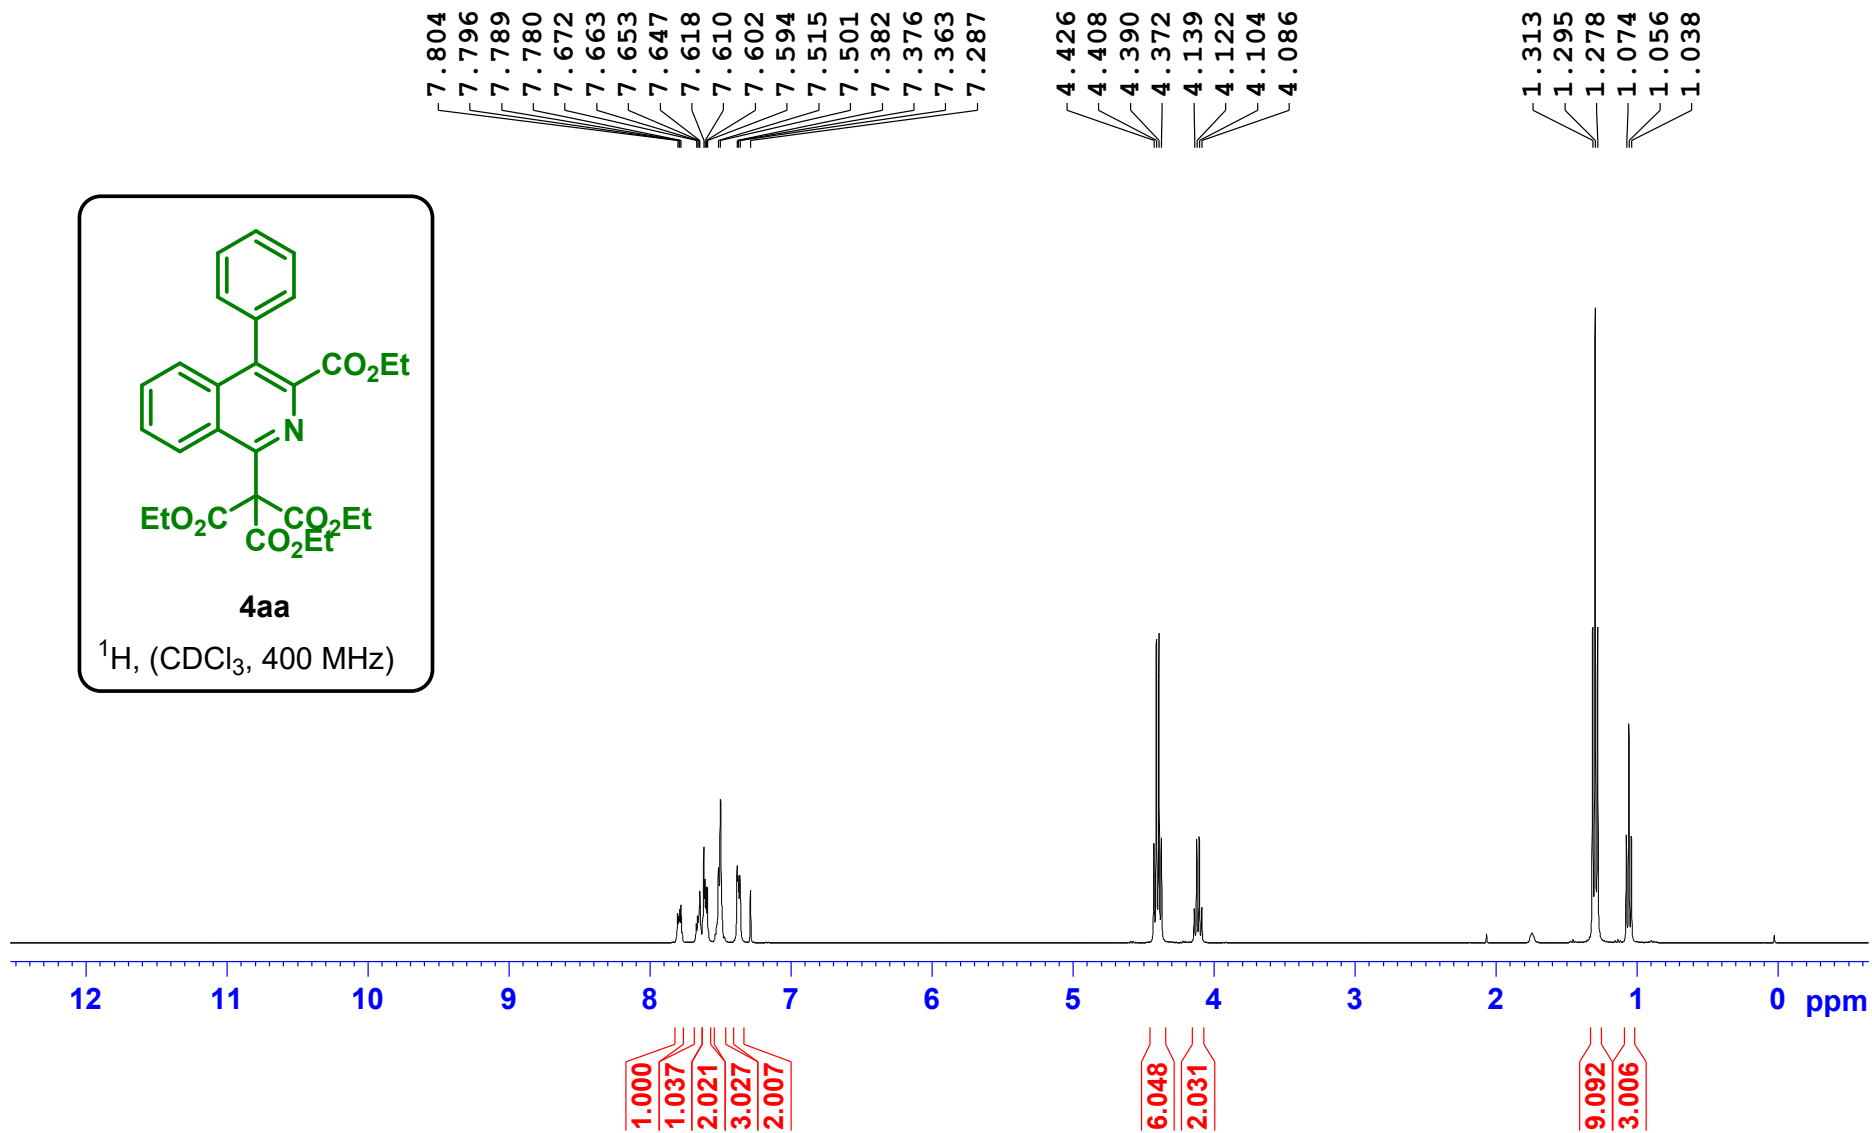

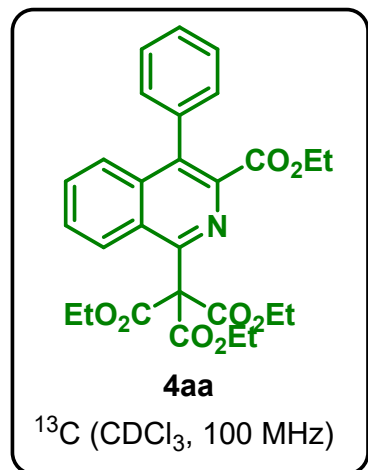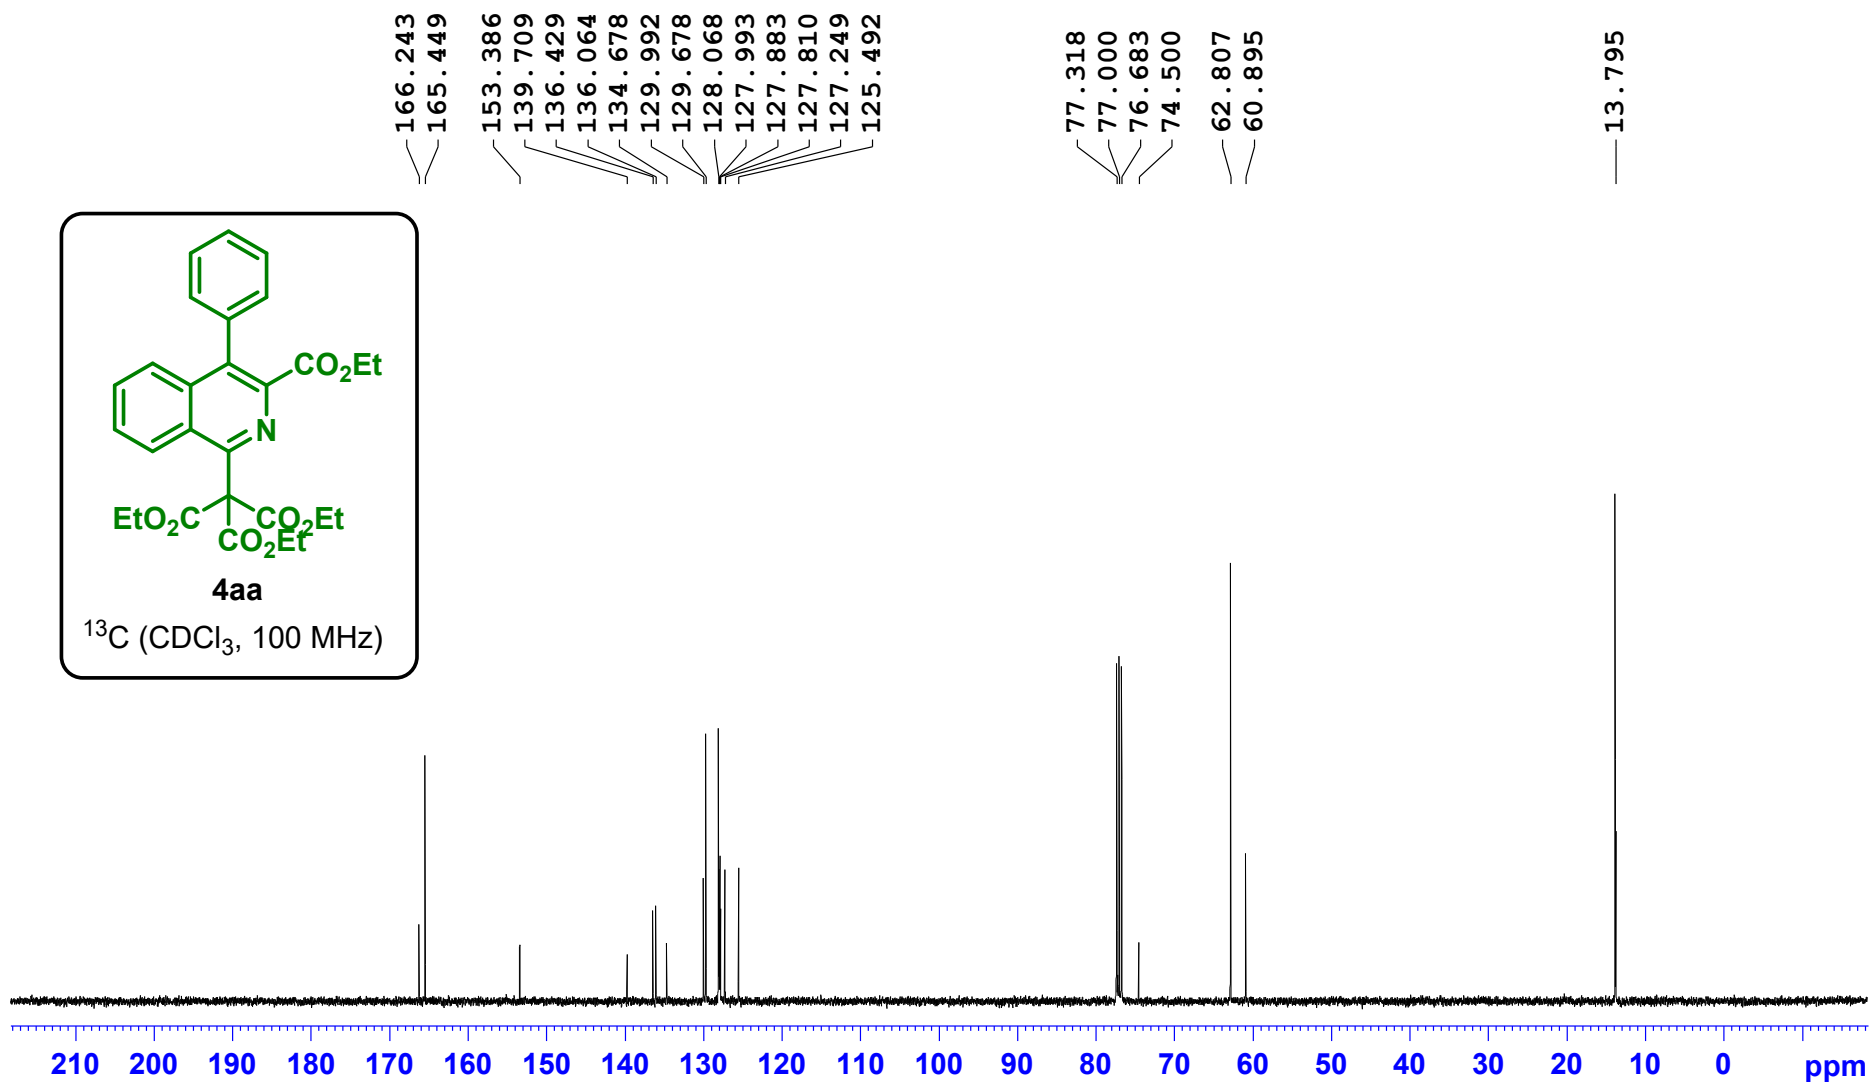

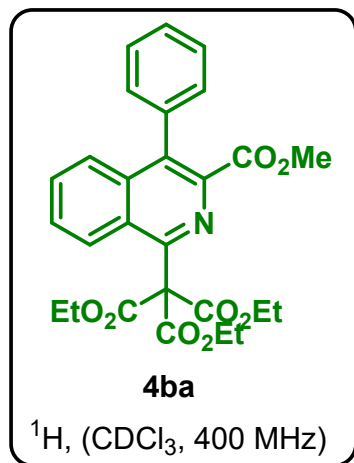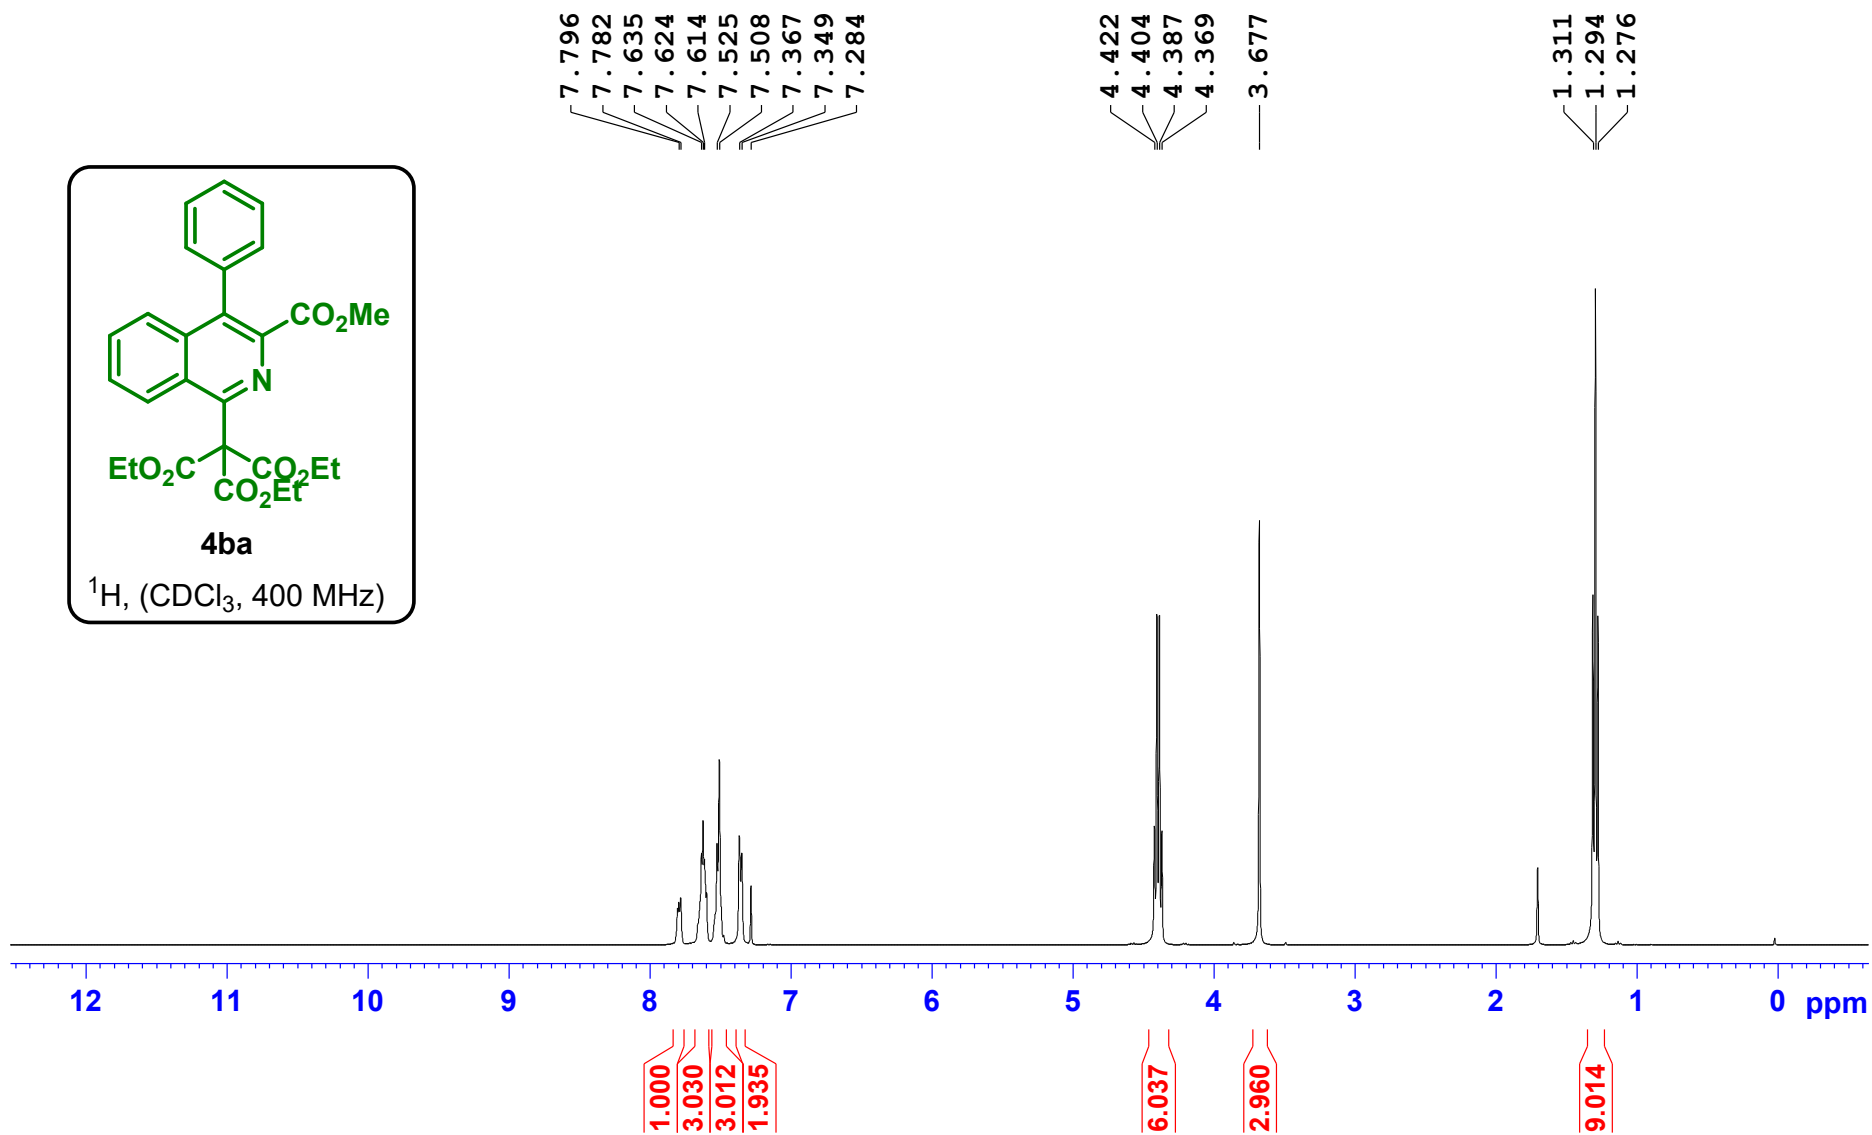



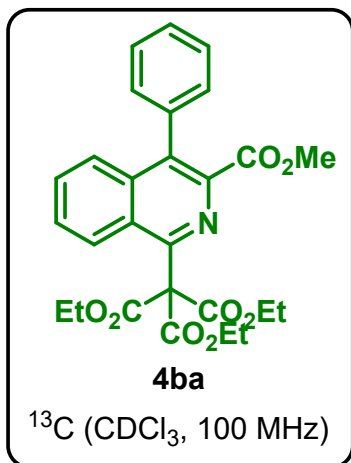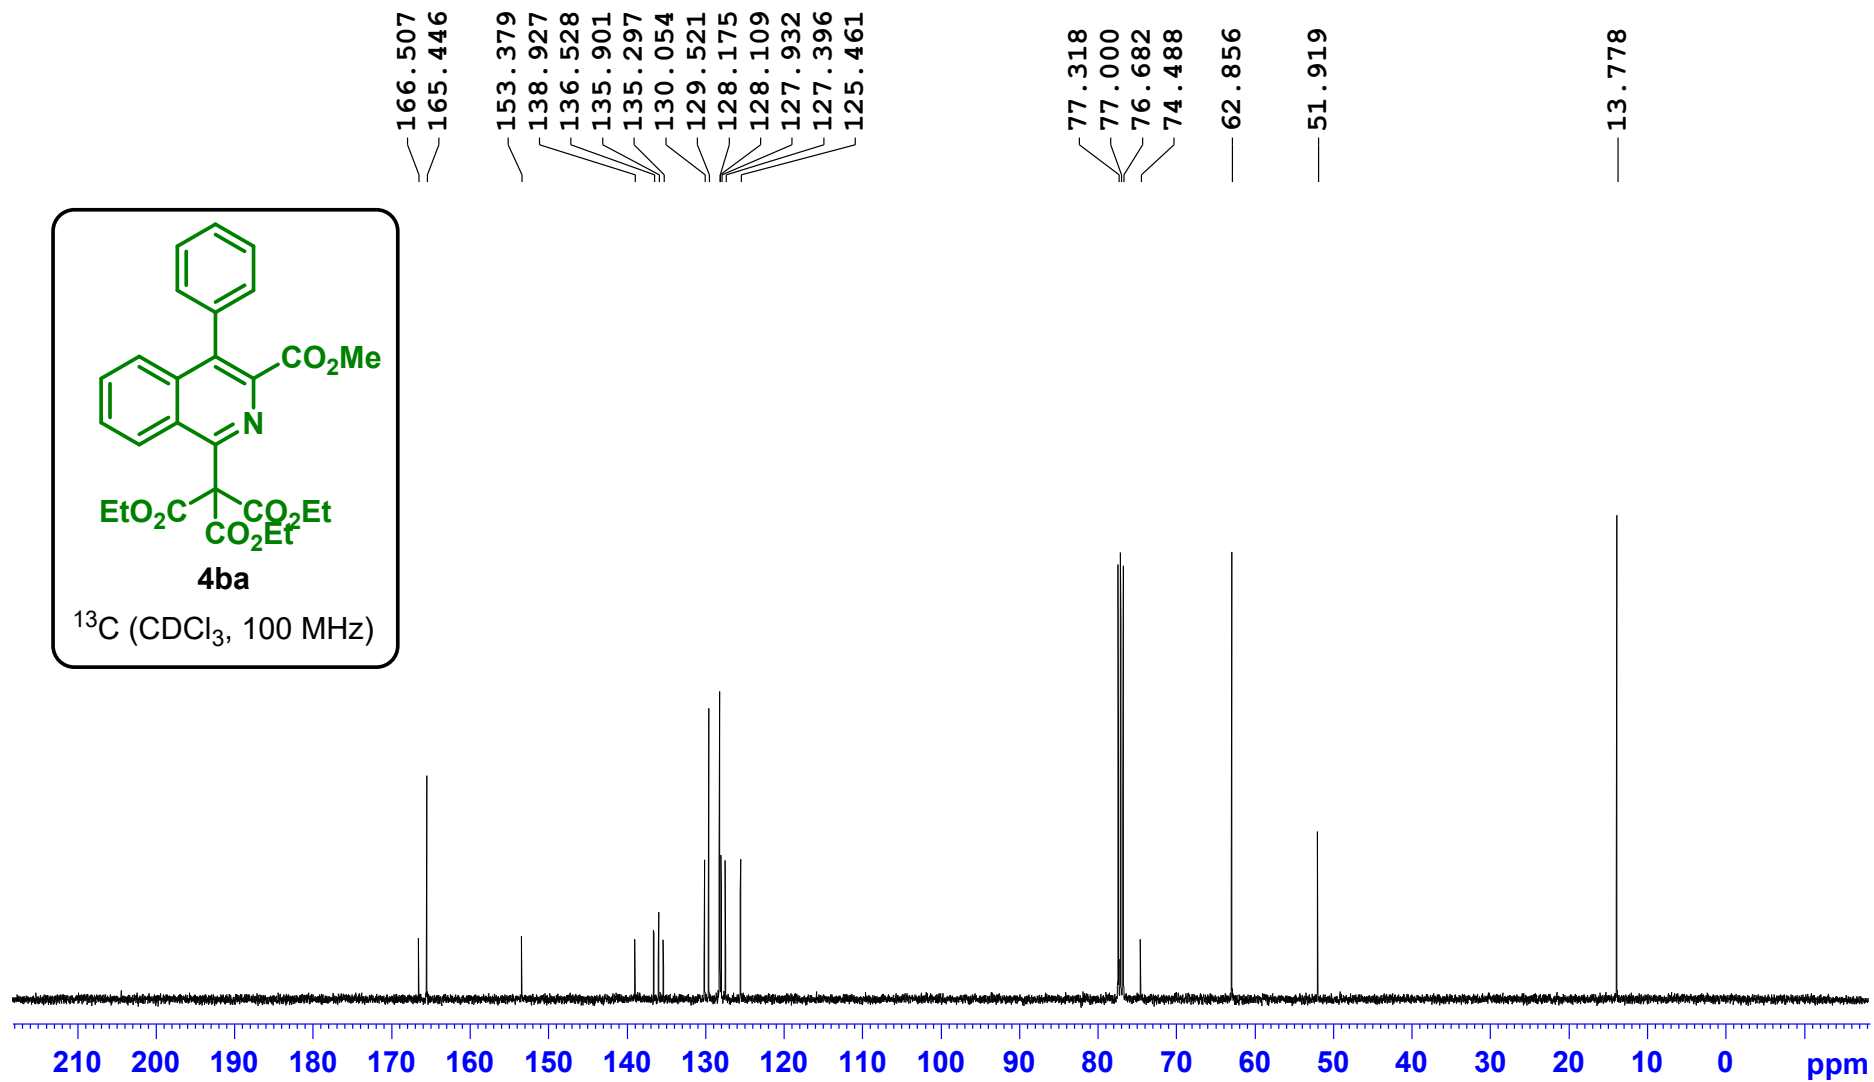

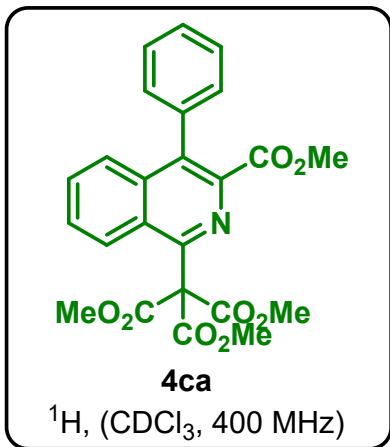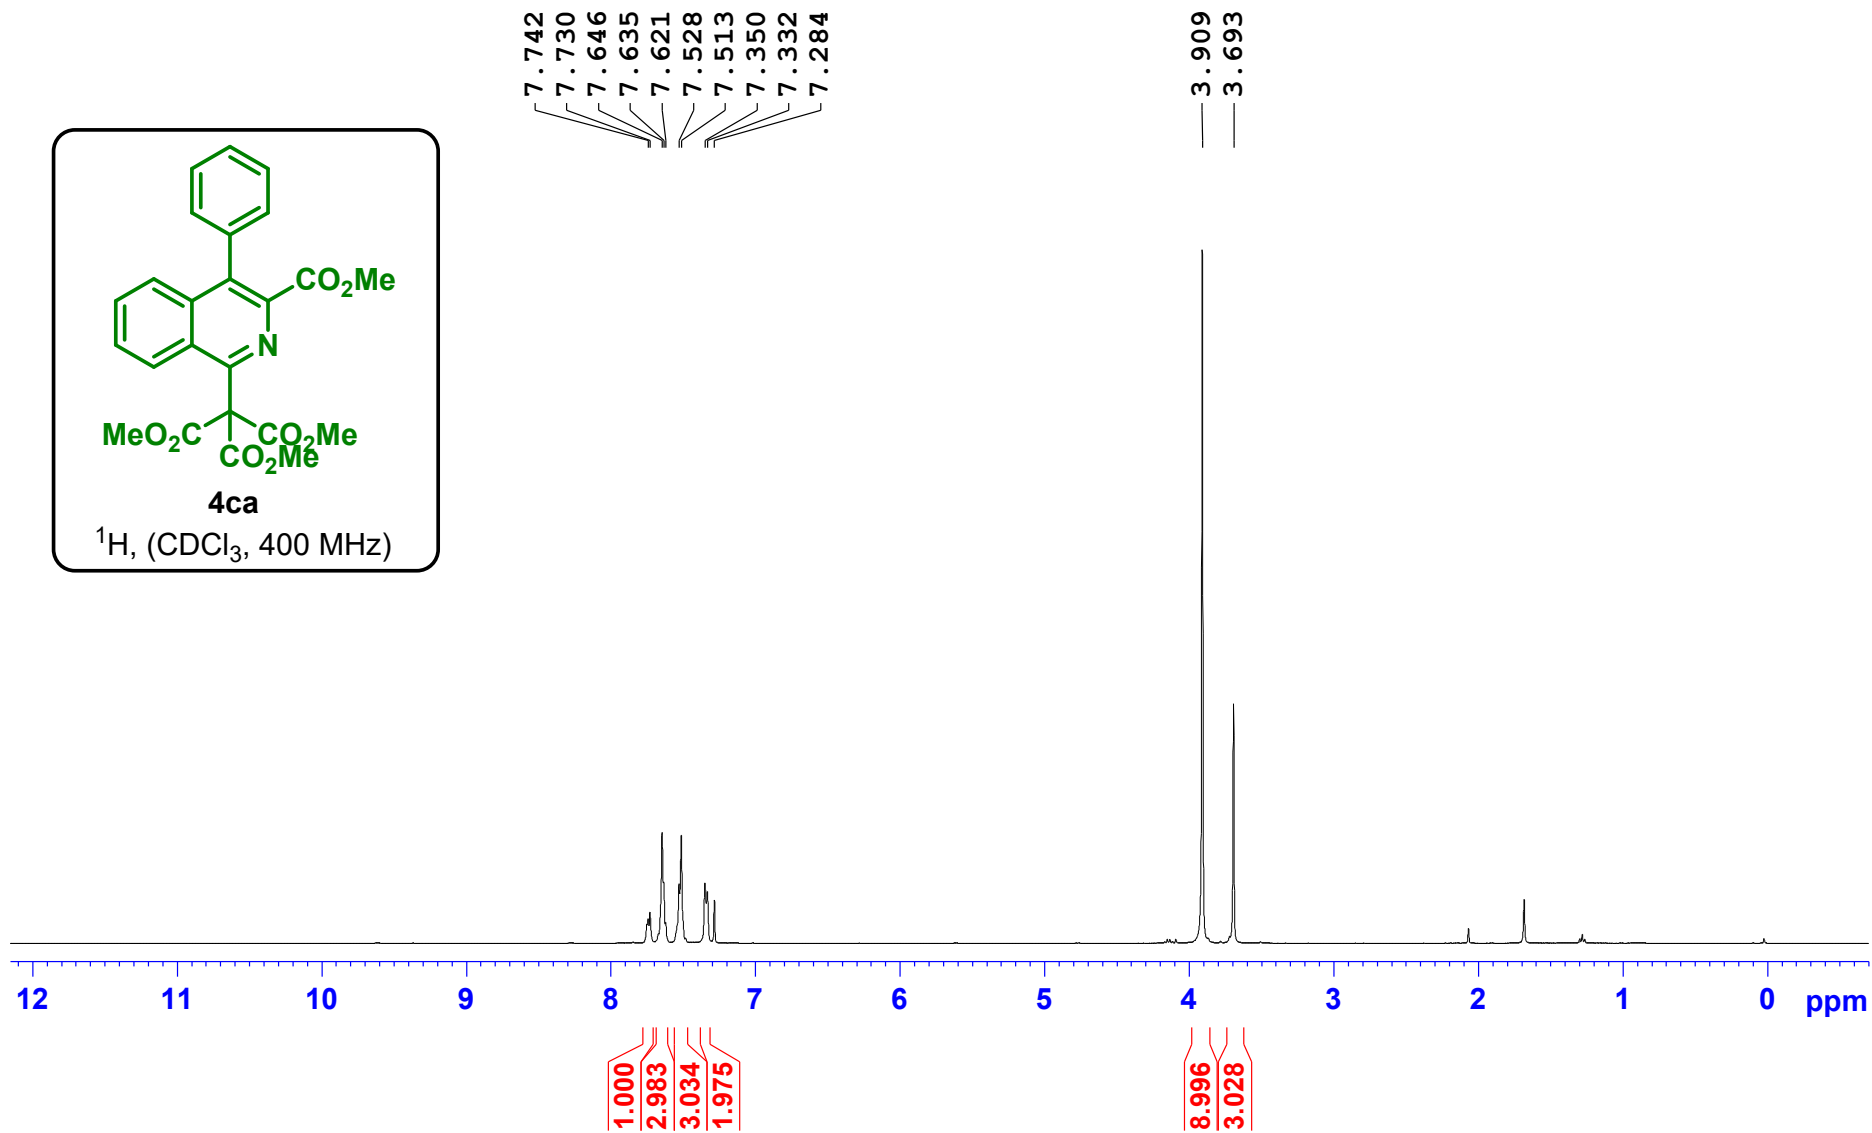

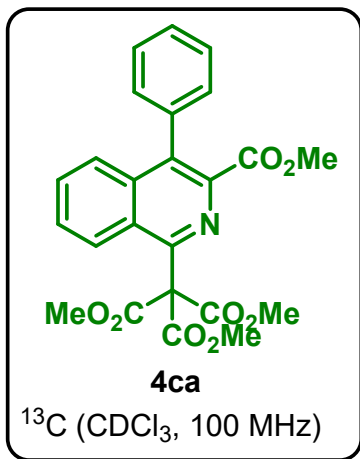

166.267  
165.841

153.066  
138.558  
136.722  
135.881  
130.212  
129.421  
128.629  
128.134  
127.964  
127.861  
127.672  
124.958

77.318  
77.000  
76.683  
74.362

53.771  
52.081

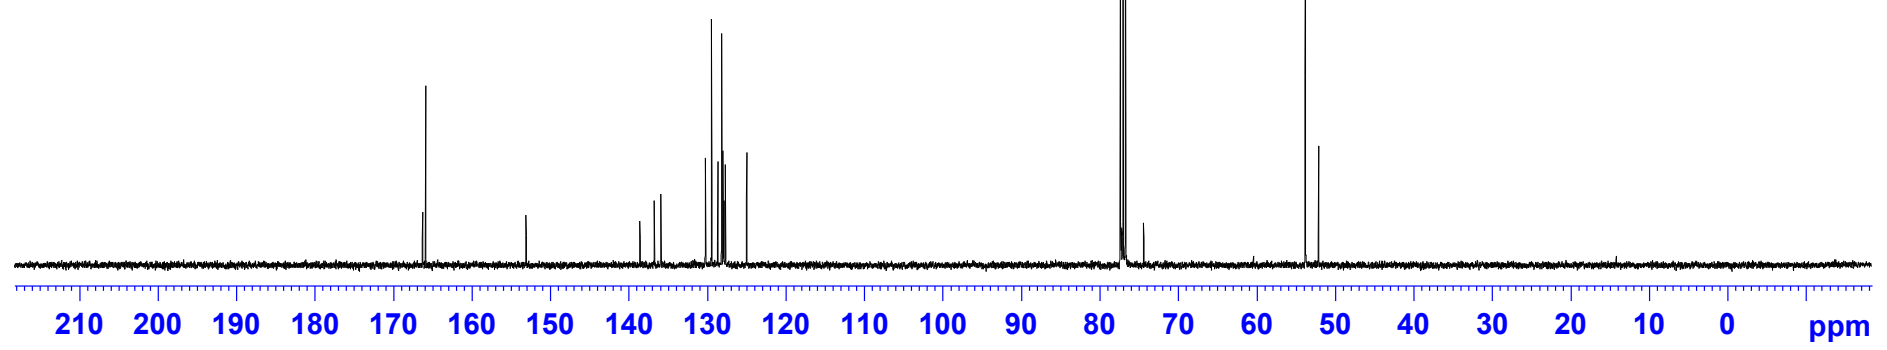

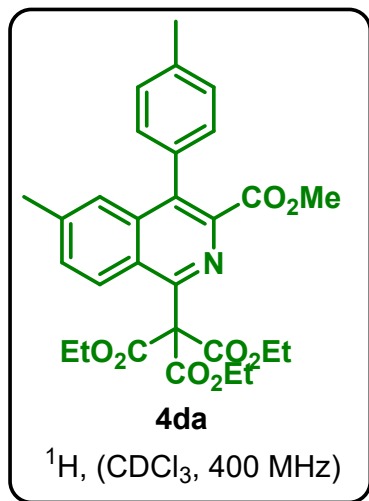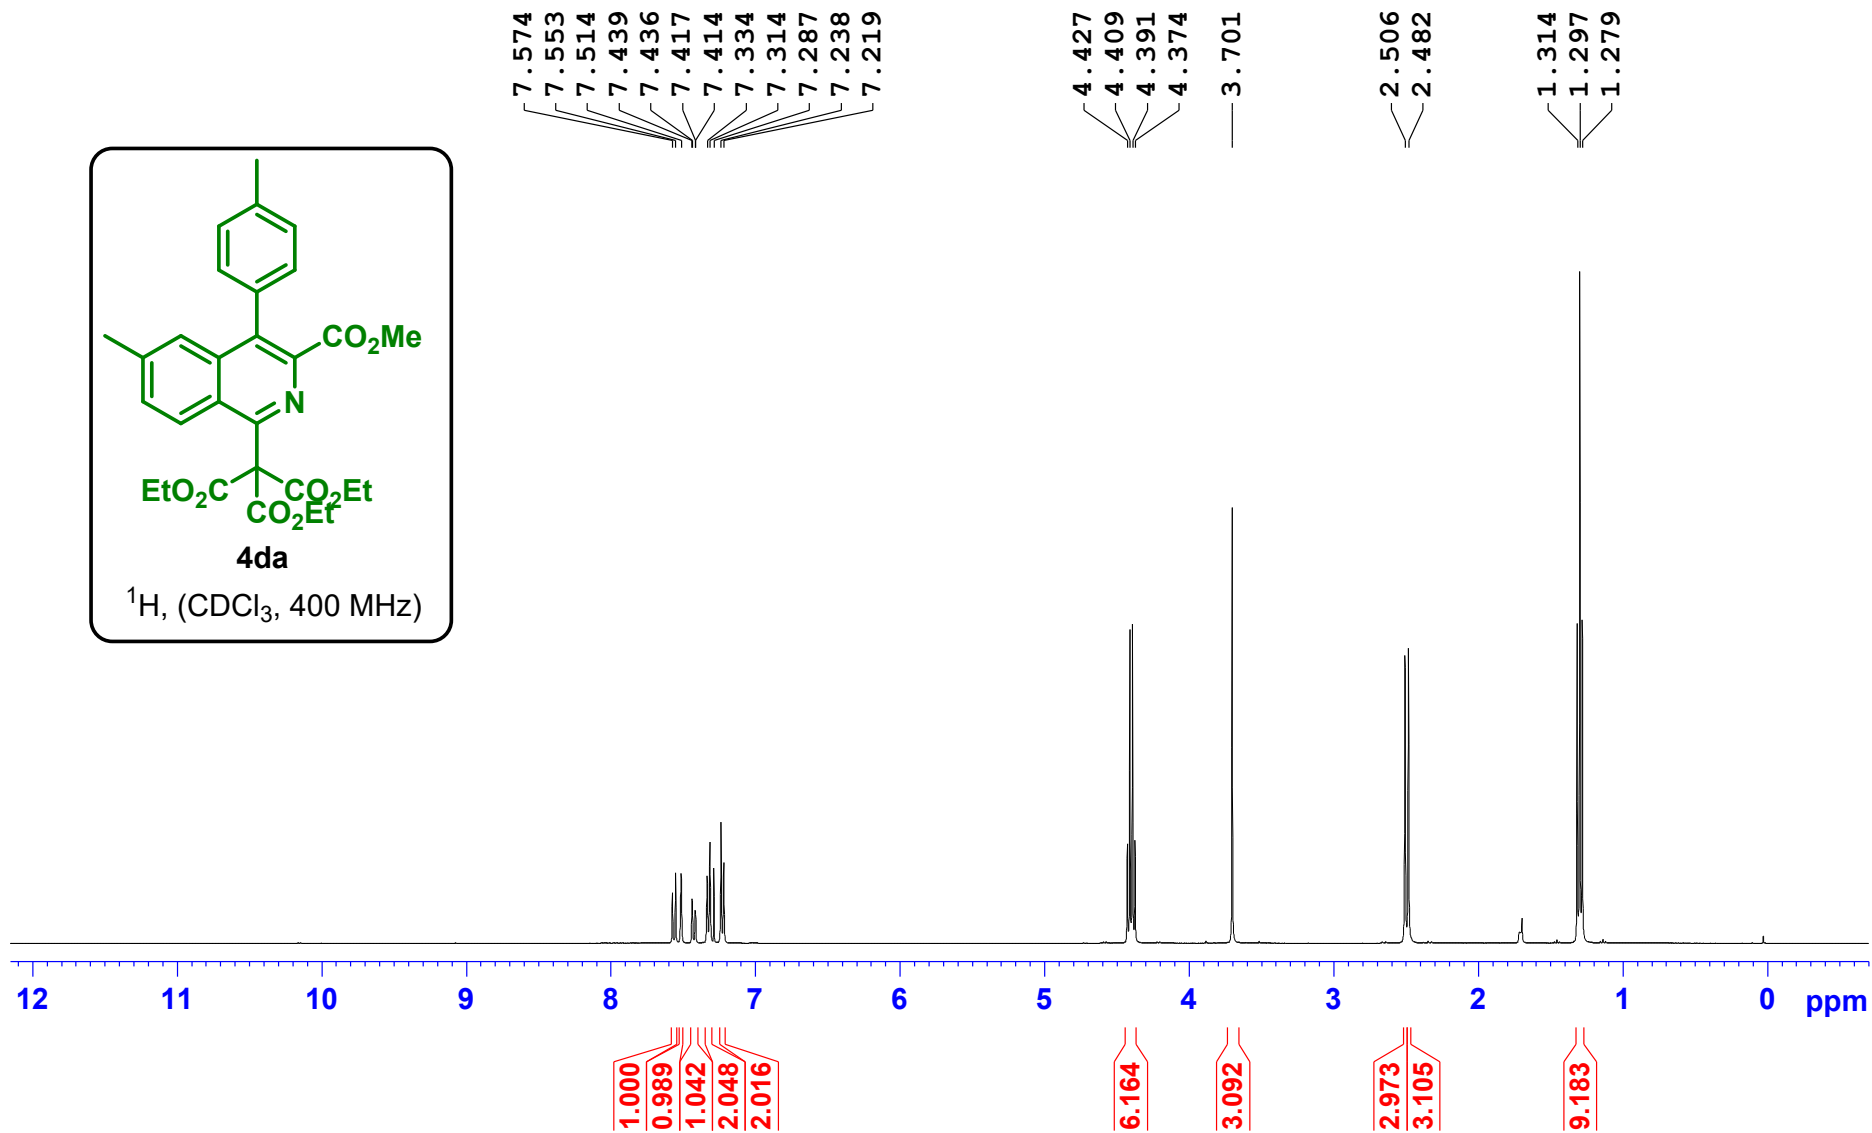

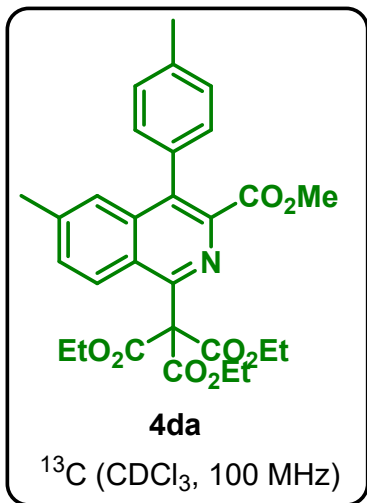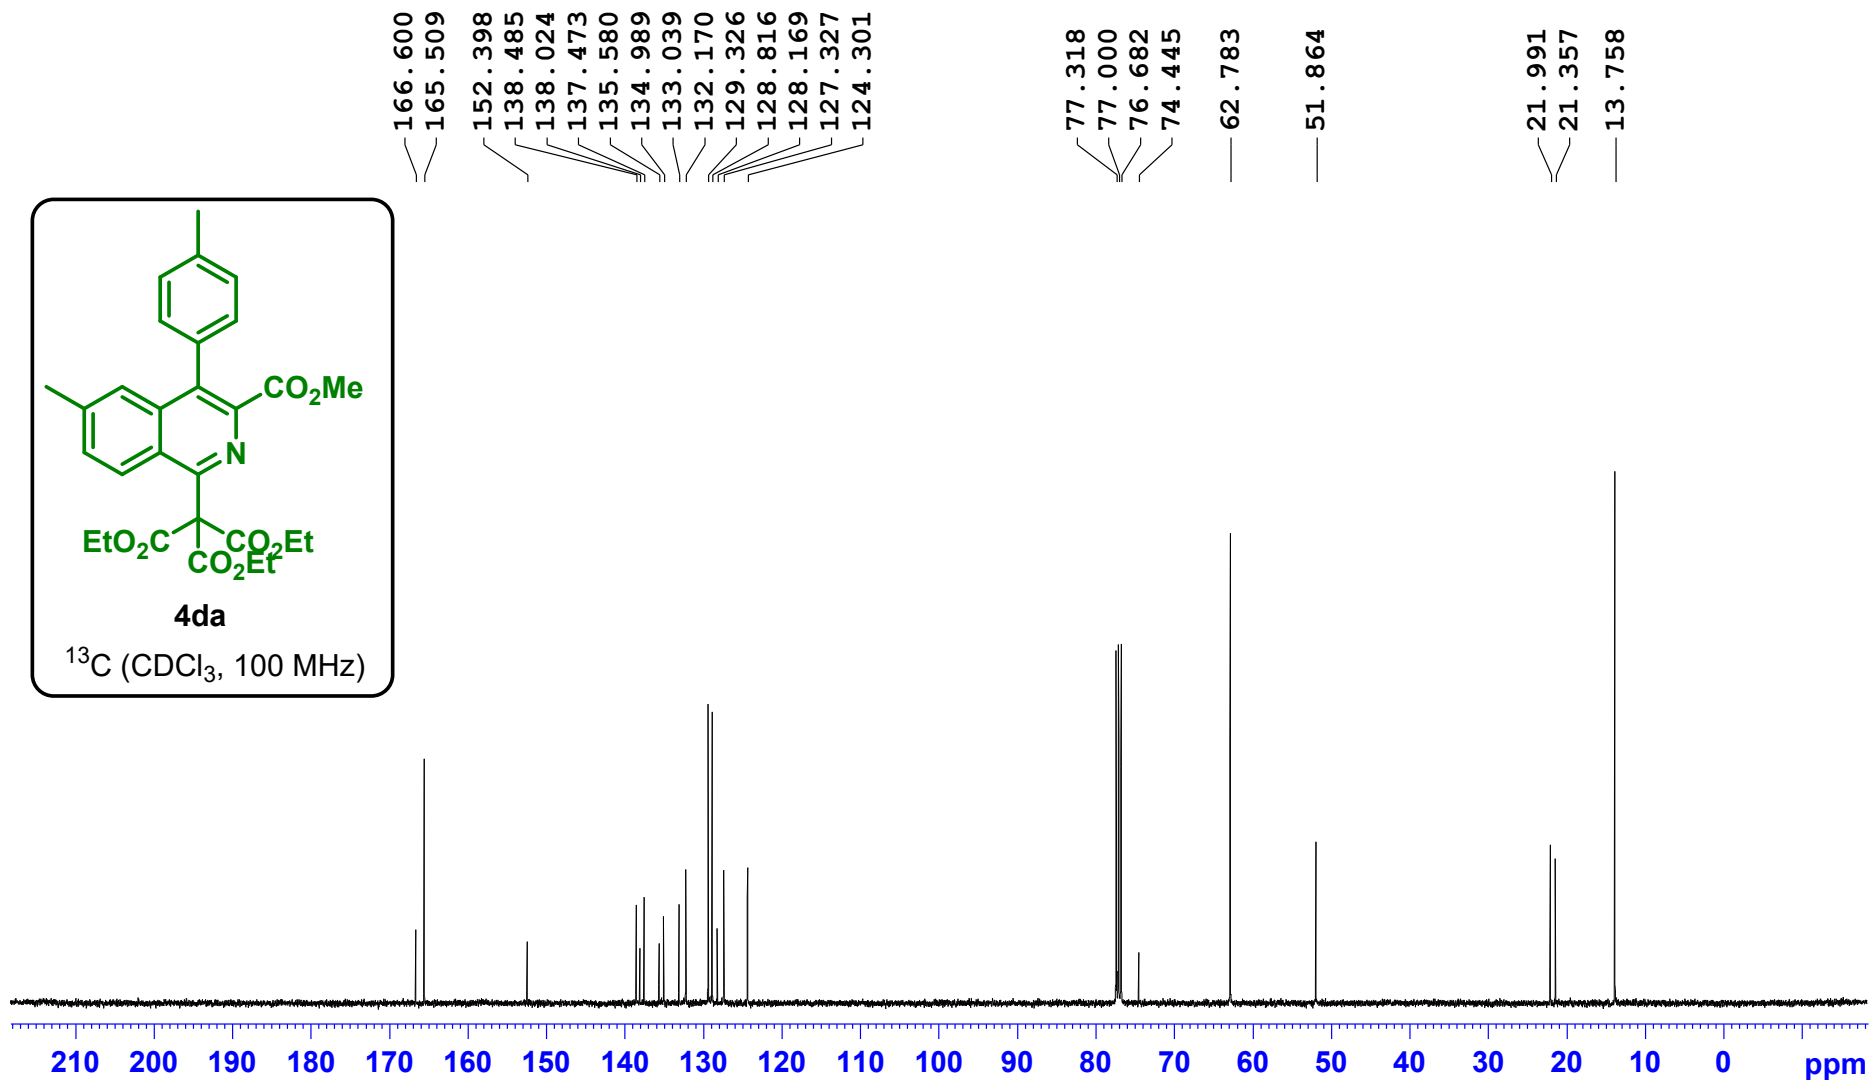

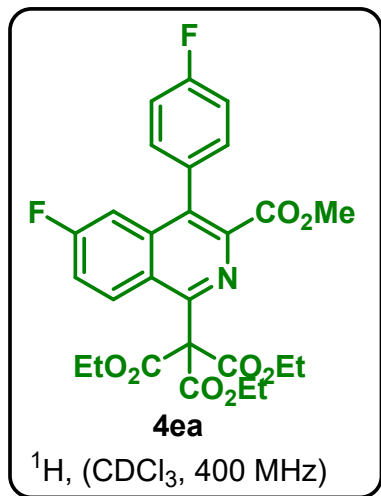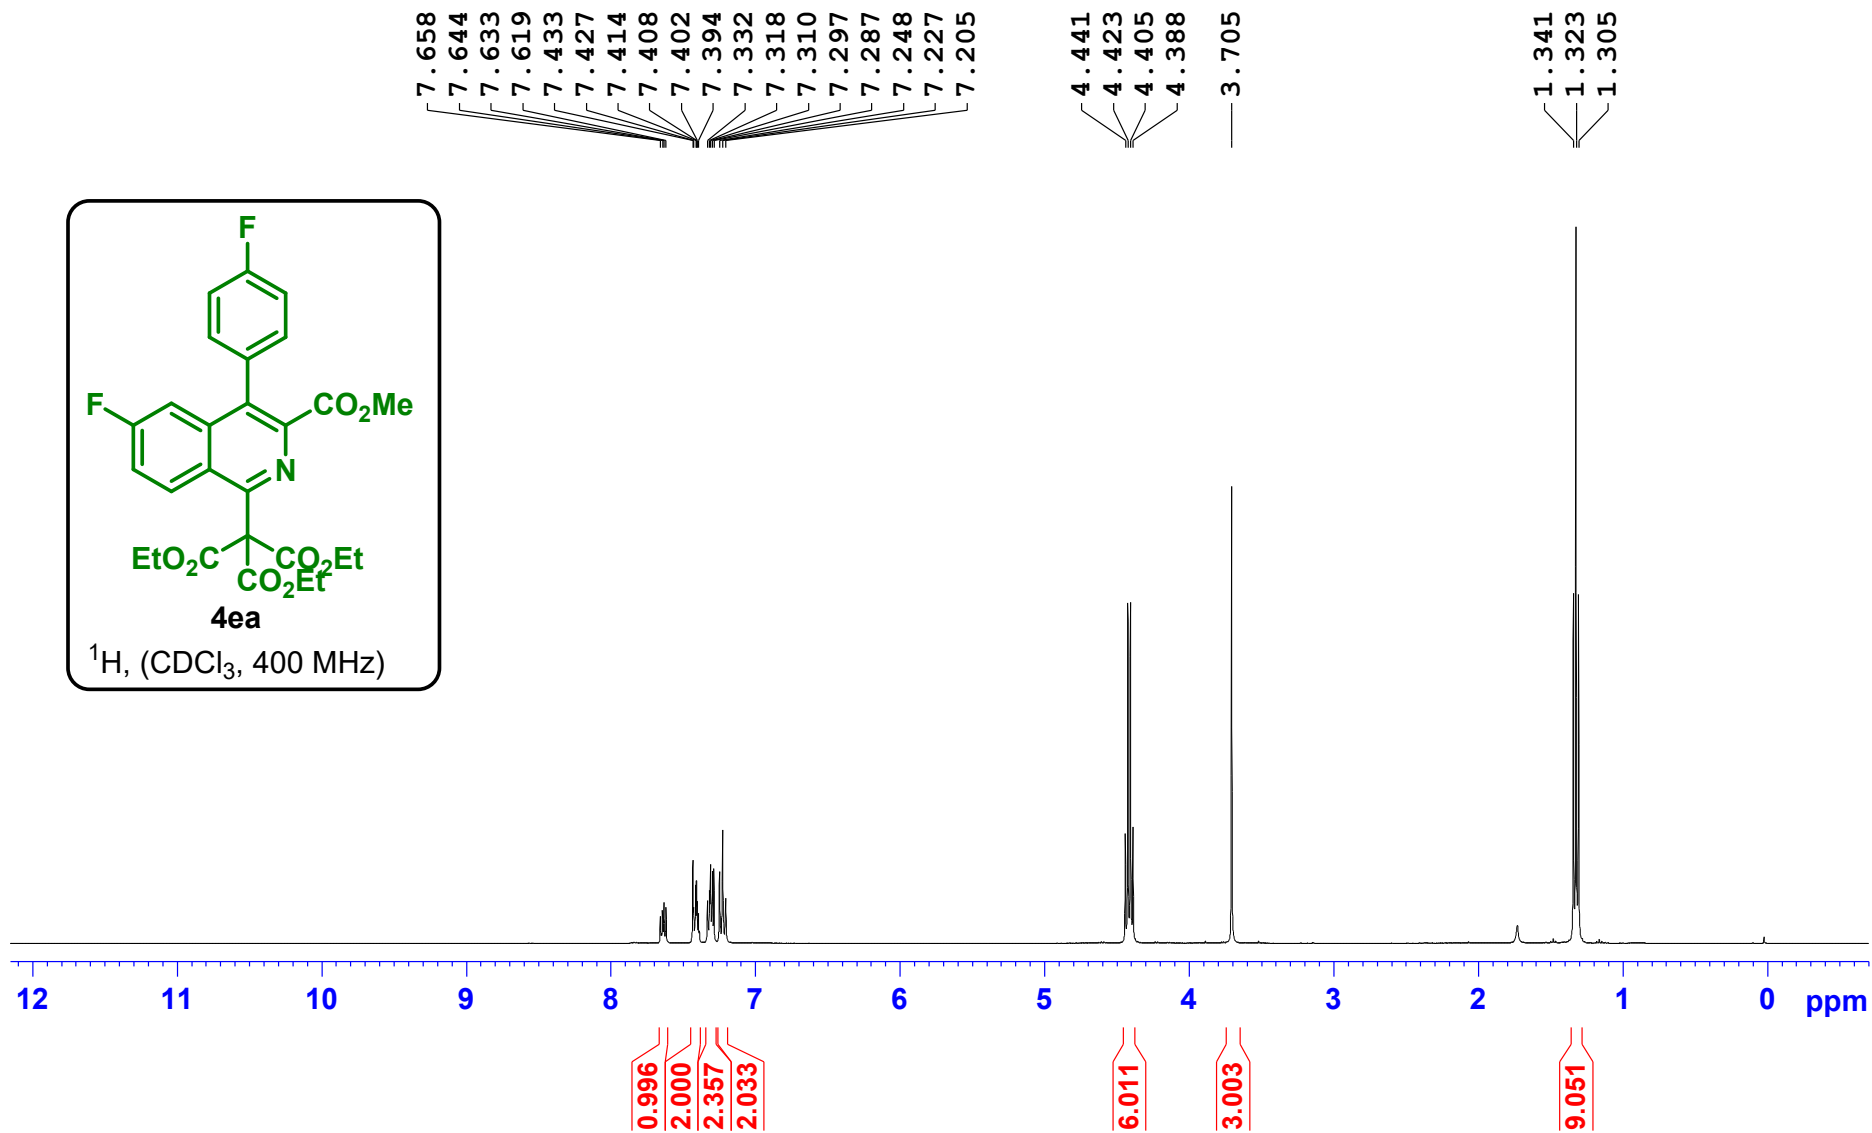

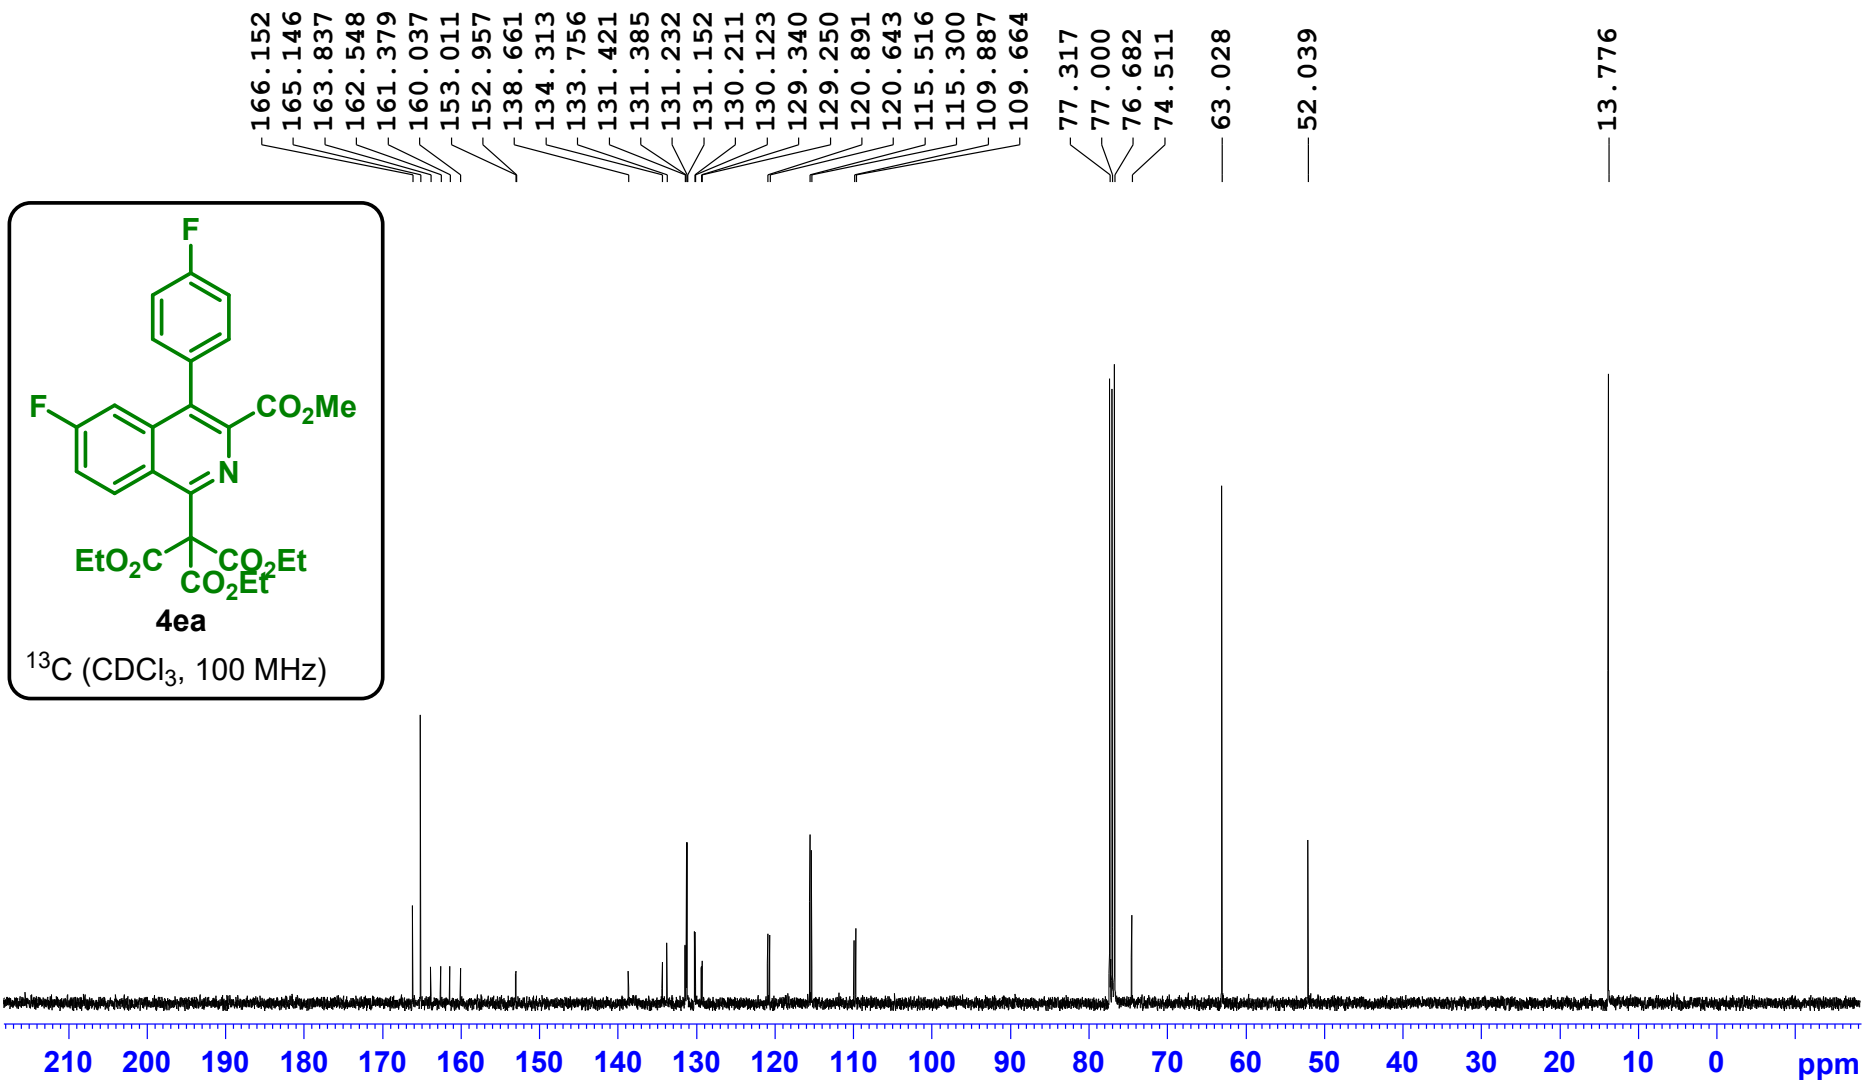

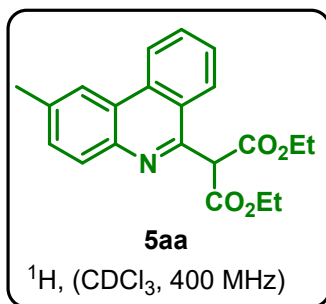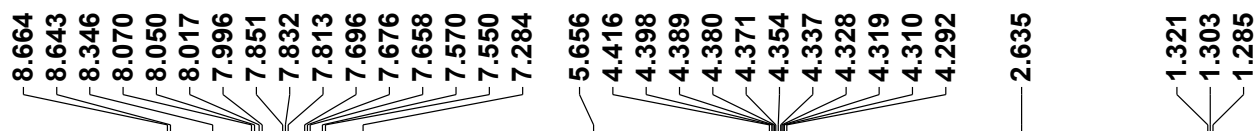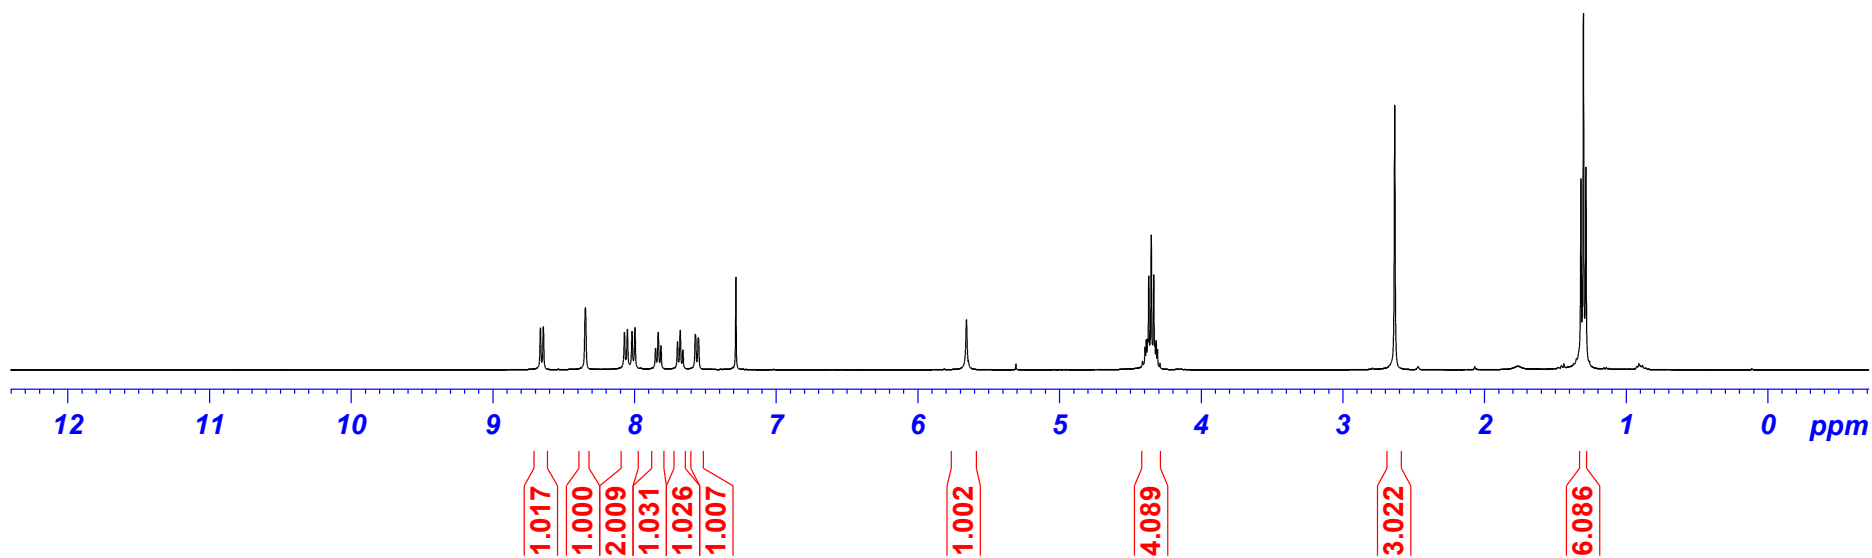



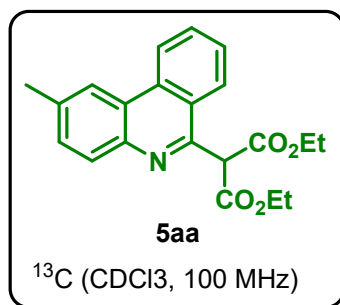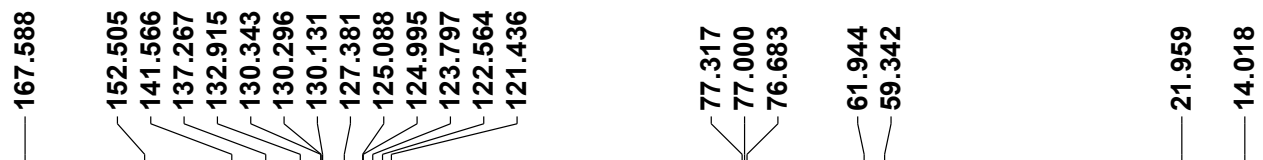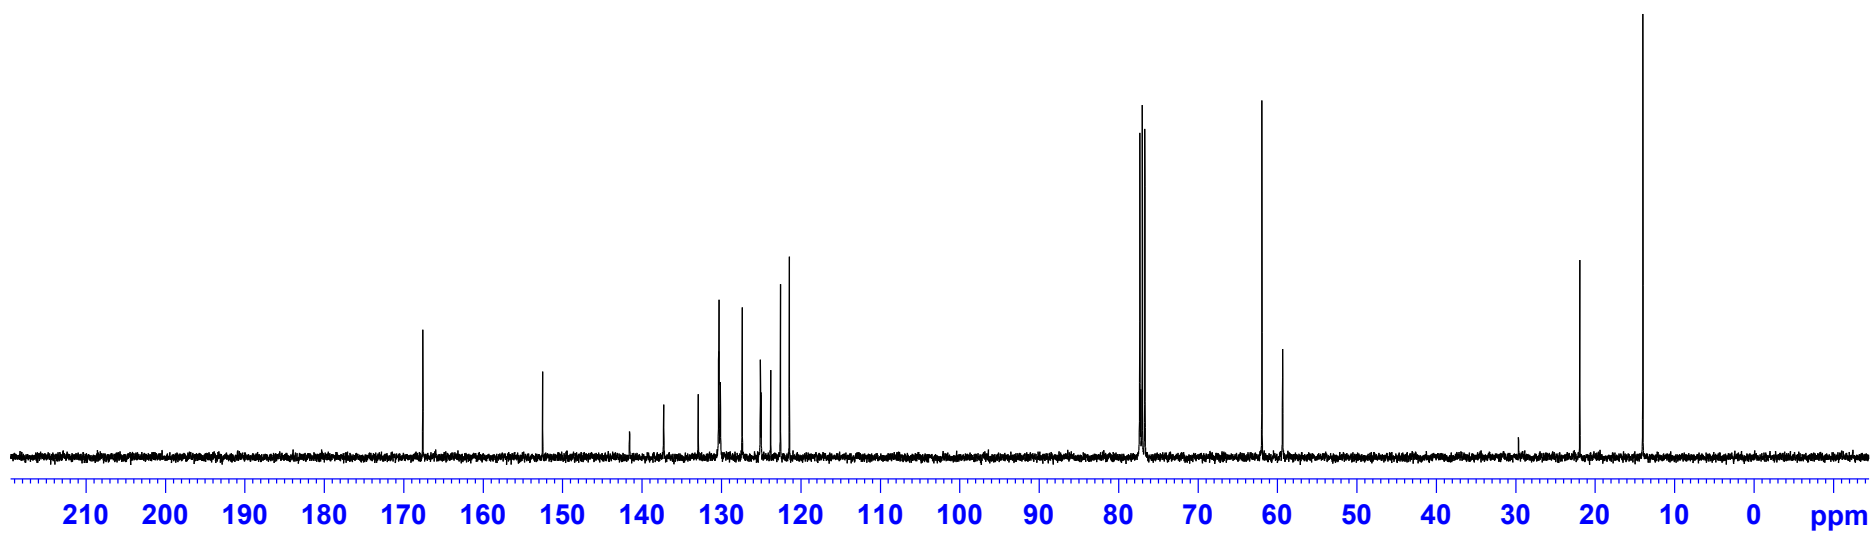

8.641  
8.620  
8.335  
8.231  
8.211  
8.028  
8.008  
7.862  
7.860  
7.842  
7.824  
7.821  
7.719  
7.717  
7.699  
7.681  
7.679  
7.566  
7.562  
7.545  
7.542  
7.284

3.050  
2.633

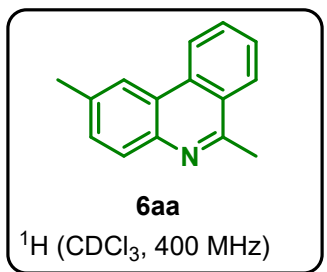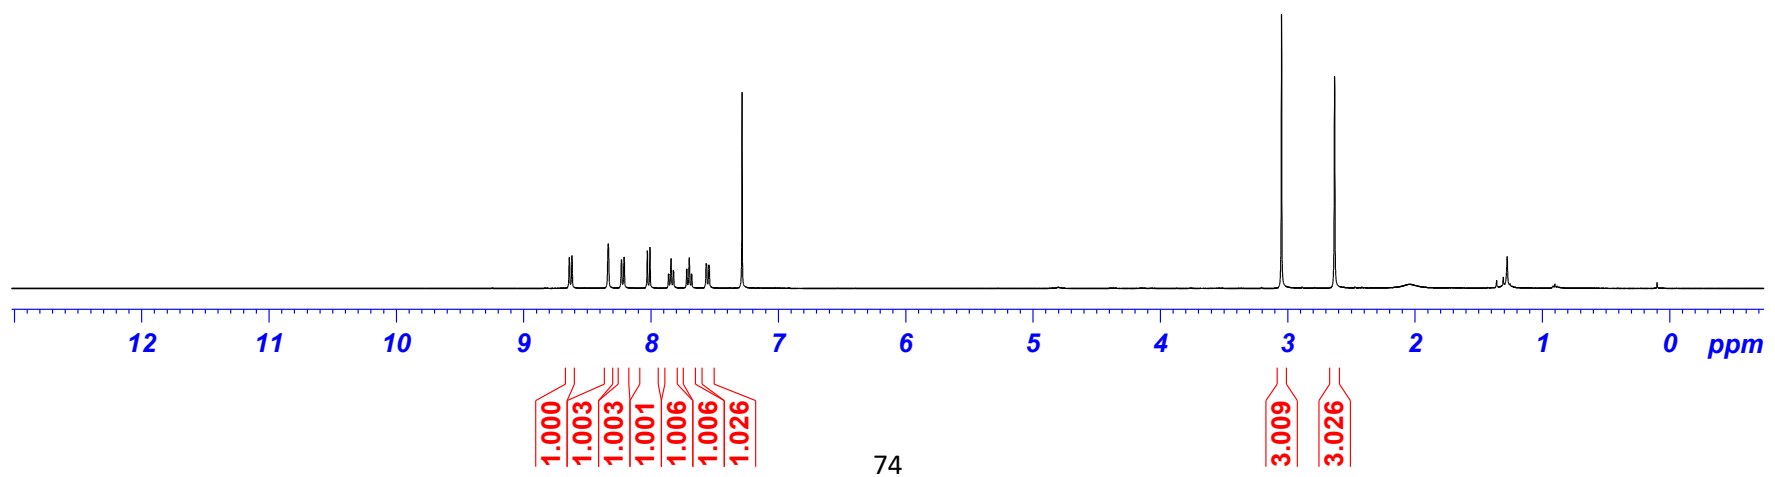

157.811  
141.874  
136.097  
132.338  
130.300  
130.277  
128.974  
127.127  
126.497  
125.942  
123.571  
122.252  
121.583

77.318  
77.000  
76.682

23.224  
21.876

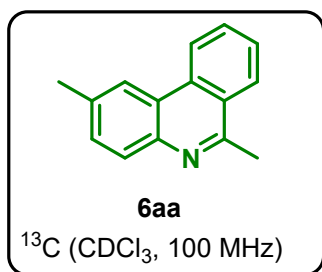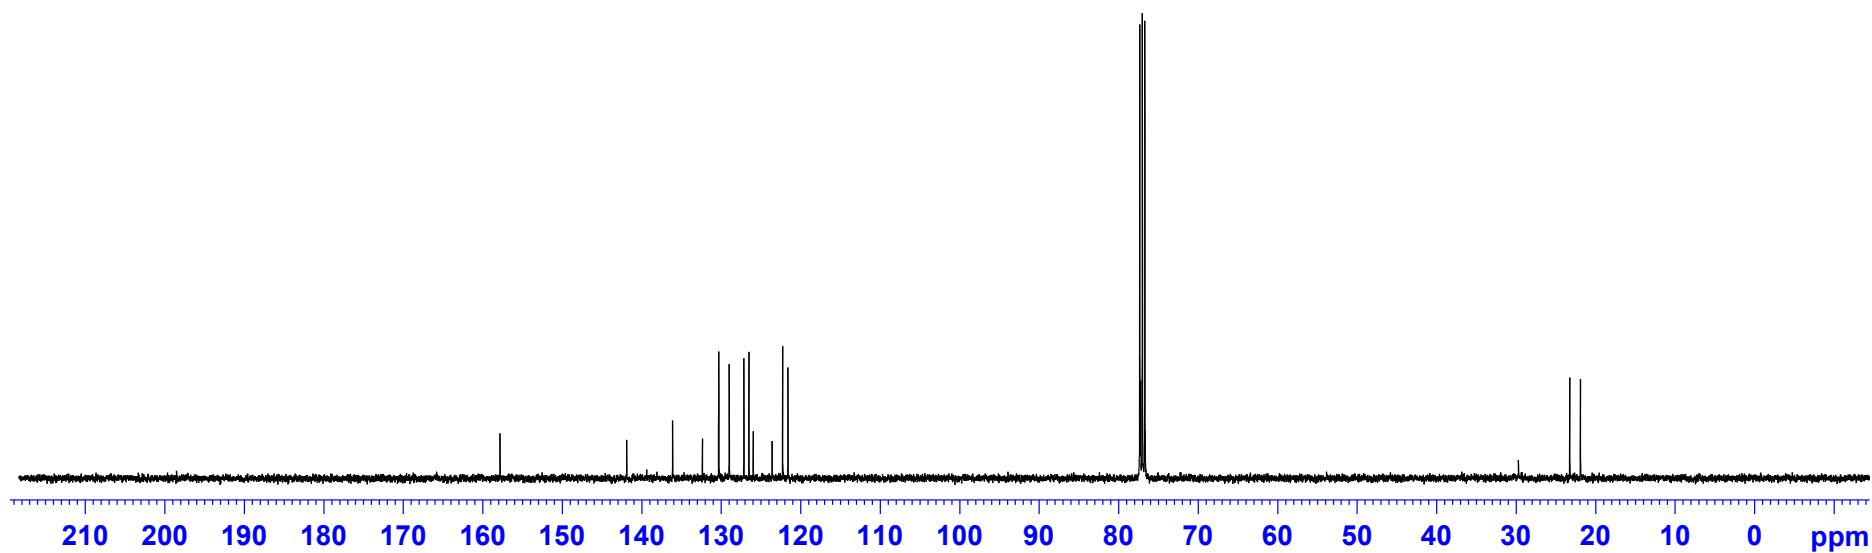

Supplement: d4ob01405g2.pdf [file d4ob01405g2.pdf]
